# Supplementary material
Source: PubMed Central journal article supplement (PMC4103369)
Supplement: 1404807111_pnas.1404807111.sapp.pdf [file 1404807111_pnas.1404807111.sapp.pdf]

## SUPPORTING INFORMATION

for

### Regulation of gene expression by the BLM helicase

#### correlates with the presence of G4 motifs

Giang Huong Nguyen<sup>1,2</sup>, Weiliang Tang<sup>3</sup>, Ana I. Robles<sup>1</sup>, Richard P. Beyer<sup>4</sup>, Lucas T. Gray<sup>5</sup>, Judith A. Welsh<sup>1</sup>, Aaron J. Schetter<sup>1</sup>, Kensuke Kumamoto<sup>1,6</sup>, Xin Wei Wang<sup>1</sup>, Ian D. Hickson<sup>2,7</sup>, Nancy Maizels<sup>5</sup>, Raymond J. Monnat, Jr.<sup>3,8</sup> and Curtis C. Harris<sup>1</sup>

<sup>1</sup>Laboratory of Human Carcinogenesis, National Cancer Institute, National Institutes of Health, Bethesda, Maryland, U.S.A.; <sup>2</sup>Department of Medical Oncology, Weatherall Institute of Molecular Medicine, John Radcliffe Hospital, University of Oxford, Oxford, U.K.; <sup>3</sup>Department of Pathology, University of Washington, Seattle, WA U.S.A.; <sup>4</sup> Center for Ecogenetics and Environmental Health, University of Washington, Seattle, WA U.S.A.; <sup>5</sup>Department of Immunology and Department of Biochemistry, University of Washington, Seattle, WA U.S.A.; <sup>6</sup>Department of Organ Regulatory Surgery, Fukushima Medical University, Fukushima, Japan; <sup>7</sup>Cellular and Molecular Medicine, Nordea Center for Healthy Aging, University of Copenhagen, Denmark; <sup>8</sup>Department of Genome Sciences, University of WA, Seattle, WA U.S.A.

**SI Index:** Supporting Information for this manuscript includes the following 19 items. A more detailed Materials and Methods section is followed by 18 Tables and Figures in order of their appearance in the manuscript text:

- 1) SI Materials and Methods
- 2) Figure S1. Study design and experimental workflow.
- 3) Figure S2. Immunoblot verification of BLM depletion from human fibroblasts.
- 4) Figure S3. PCA of mRNA and miRNA expression in BLM-depleted human fibroblasts.
- 5) Figure S4. qPCR confirmation of mRNA array data.
- 6) Table S1. BS patient and control detail.
- 7) Table S2A. Significantly differentially expressed mRNAs identified in BS compared with matched control human fibroblasts.
- 8) Table S2B. Significantly differentially expressed mRNAs identified in BLM-depleted compared with

isogenic, nonspecific shRNA-treated control human 82-6 fibroblasts.

- 9) Table S2C. Common significantly differentially expressed mRNAs in BS and BLM-depleted cells.
- 10) Table S3. Gene Set Enrichment Analysis (GSEA) detail.
- 11) Table S4. Significantly differentially expressed miRNAs identified in BS or BLM-depleted fibroblasts.
- 12) Table S5. Experimentally validated targets of miRNAs significantly altered in BS or BLM-depleted cells.
- 13) Figure S5. qPCR confirmation of miRNA array data.
- 14) Figure S6. G4 motif frequencies and enrichment near transcription start sites and intron 1 boundaries of genes with altered expression in BLM-depleted cells.
- 15) Table S6. Hypergeometric test of miRNA targeting vs. significantly altered mRNA expression
- 16) Table S6a. Selected target genes differentially expressed in BS and BLM depleted cells
- 17) Table S7A. Differentially Expressed Genes in BS patient vs NM cells that have at least one G4 motif in each region
- 18) Table S7B. Differentially Expressed Genes in BLM-depleted vs NS-treated that have at least one G4 motif in each region
- 19) Table S8. G4 statistics for genes significantly altered in BS and BLM-depleted cells.

## 1. SI Materials and Methods:

**Cells and cell culture conditions.** We analyzed mRNA and miRNA expression in primary fibroblast strains from BS patients and from matched primary human skin fibroblasts from healthy individuals (NM), as well as in primary human fibroblasts depleted for BLM protein by expression of a *BLM*-specific shRNA. Primary human skin fibroblast strains from BS patients (n=16, donor median age 11.5 years) or from control donors (n=15, donor median age 19 years) were obtained from the Coriell Cell Repositories (Camden, NJ, USA). Normal control fibroblasts (NM) were age and gender-matched to BS cases. Additional detail on these BS patient and NM fibroblasts is given in Table S1. Cells were cultured in Eagle's Minimum Essential Medium with Earle's salts, supplemented with 15% fetal bovine serum, non-essential amino acids, penicillin/streptomycin and 2mM L-glutamine (all supplied by Invitrogen, Carlsbad, CA, USA). All cells were cultured at 37°C in a humidified 5% CO<sub>2</sub> incubator. Passage number was calculated based on the number of passages at purchase plus the number of

passages performed prior to cell harvesting. The human primary fibroblast strain 82-6 was initiated from a foreskin fibroblast preparation as previously described (1), and grown in Dulbecco-modified Eagle medium (Mediatech, Manassas, VA, USA) supplemented with 10% fetal bovine serum (HyClone, Logan, UT, USA), 100 U/mL penicillin, and 100 µg/mL streptomycin at 37°C in a humidified 5% CO<sub>2</sub> incubator.

**BLM depletion experiments.** BLM protein was depleted from 82-6 primary human fibroblasts by lentiviral transduction with expression of a *BLM*-specific shRNA as previously described (2, 3). In brief, a *BLM*-specific shRNA (BLM-3: 5'-GTACTAAATGGCAATTTAA-3') was cloned into the lentiviral vector pLKO.1 under control of the human U6 promoter (4). Depletions were performed by transducing 10<sup>6</sup> primary fibroblasts cells with a *BLM*-shRNA-expressing lentivirus at a multiplicity of infection (MOI) of 10 for 2 d, followed by puromycin selection (2.0 µg/mL) for 8 d. BLM protein depletion to ≥90% was verified on day 10 by Western blot analysis, where day 0 was the start of viral transduction (2)(Figure S2). Depletions were performed in triplicate, using either the *BLM*-specific shRNA or a scrambled shRNA with no known target sequence in the human genome (plasmid 1864, Addgene, Cambridge, MA), to provide controls for comparison with untransduced cells.

**RNA isolation and quality control.** RNA was isolated from human diploid 82-6 primary fibroblast cultures when 75% confluent. Cells were washed in 1X PBS, scrapped off plates and collected as pellets that were stored at -80°C. Total RNA was isolated using TRIZOL reagent, following the manufacturer's protocol (Invitrogen). Total RNA samples were isolated using Qiagen's miRNAeasy Mini Kit (Qiagen, Valencia, CA). RNA quality was assessed using the Agilent 2100 Bioanalyzer (Agilent Technologies, Palo Alto, CA), and only samples of high quality, defined by distinct 28S and 18S rRNA bands together with a RIN (RNA integrity number) >7, were used for further analyses.

**mRNA expression profiling.** Whole genome transcript exon profiling of BS and NM fibroblasts obtained from the Coriell collection of human primary fibroblasts, and of BLM-depleted 82-6 primary

human fibroblasts were performed using the Affymetrix GeneChip Human Exon 1.0 ST Array, which contains four probes/exon and ~40 probes/gene (Affymetrix, Santa Clara, CA). RNA labeling, hybridization, washing, and image acquisition were performed at the Laboratory of Molecular Technology (NCI-Frederick) using a standard Affymetrix labeling, hybridization and wash protocol.

**miRNA expression profiling.** Profiling of miRNA expression in BS and NM primary fibroblasts was performed using a custom miRNA microarray chip (OSU-CCC version 4.0) that includes 898 probes to human and 704 probes to mouse mature or precursor miRNAs, spotted in duplicate (5). Briefly, total RNA (5µg) was converted to biotin-labeled complementary DNA, hybridized onto the chips, and processed by direct detection of the biotin-containing transcripts by streptavidin-Alexa 647 conjugate. Slides were subsequently scanned with the Axon 4000B Scanner (Molecular Device) and spot intensities were quantified with Genepix (version Pro 6.0.1.00). Profiling of miRNA expression in BLM-depleted primary human fibroblasts was performed using the Nanostring nCounter Human miRNA Expression Assay Kit (Nanostring, Seattle, WA). For these analyses we used 100 ng RNA and the processing protocol recommended by the manufacturer.

In order to confirm miRNA expression differences we used qPCR. RNA samples were reverse-transcribed using an Applied Biosystems High-Capacity cDNA Archive Kit (Applied Biosystems/AB, Foster City, CA) prior to assay in triplicate using miRNA-specific Taqman Gene Expression Assays (ABI). Double-stranded cDNA for each sample was amplified for 40 cycles using the TaqMan Universal PCR Master Mix using the manufacturer's protocol on the 7500HT Sequence Detection System (ABI). For quality control, any samples with either an 18S rRNA or RNAU66 cycle value >20, or a gene or miRNA cycle value >36, were considered to be of poor quality and removed. Alternatively, PCR reactions were run following a 12-round pre-amplification on a BioMark 48.48 Dynamic Array System (Fluidigm, South San Francisco, CA). The mRNA or miRNA readings were calculated using the comparative method ( $2^{-\Delta Ct}$ ), where Ct = threshold cycle and  $\Delta Ct = (Ct \text{ gene (or miRNA)} - Ct \text{ 18S rRNA (or RNAU66)})$ .

**Identification of differentially expressed mRNAs.** Raw Human Exon 1.0 ST microarray expression data were pre-processed and normalized with Affymetrix® Expression Console™ Software using RMA normalization (affymetrix.com). From normalized data, genes with significant evidence for differential expression were identified using the Bioconductor limma package using a linear fixed effects model with adjustments for age and gender for the primary fibroblast data to calculate the contrast BS-NM (6, 7). For the BLM-depleted 82-6 normal human fibroblasts, a linear fixed effects model was used to calculate three contrasts, BLM-control, NS-control, and BLM-NS. The limma methodology calculates a p-value for each gene using a modified t-test in conjunction with an empirical Bayes method to moderate the standard errors of the estimated log-fold changes. This method of detecting differentially expressed genes draws strength across genes for more robust and accurate detection of differentially expressed genes. Such an adjustment has repeatedly been shown to avoid an excess of false positives when identifying differentially expressed genes (8). We then used the p-values from limma together with the Bioconductor package qvalue (9, 10) to estimate the false discovery rate associated with our list of differentially expressed genes (DEGs). This methodology allows us to address the multiple testing problem without resorting to an excessively conservative approach that controls the familywise error, such as a Bonferroni correction. In order to directly compare the genes from the two data sets instead of probesets, we removed duplicate probesets by choosing the probesets with the maximum median variance across all the samples (11).

Exploratory analyses and visualizations were also performed for set of results using the Partek Genomics Suite version 6.6 (Partek Inc, St Louis, MO, USA) with default import parameters. Interrogating probes were imported using the Core Meta-Probeset filter (most confident probes) with adjustment for GC content and RMA background correction, followed by Quantile Normalization and Median Polish. Gene-level data was obtained by mean summarization of the core transcripts.

**Identification of differentially expressed miRNAs.** Preprocessing and normalization of OSU-CCC miRNA microarrays from BS and NM primary fibroblasts were done in R (version 2.6.0). nCounter RCC files generated from BLM-depleted samples were imported into nSolver (Nanostring), quality

control-verified and normalized to the geometric mean of the top 100 expressed miRNAs. Normalized probes were imported into Partek Genomics Suite. Further, miRNAs were deemed absent if intensity <10, and excluded from the analysis if they were not present in at least 40% of samples (in the case of BS-NM comparison) or at least 2 samples (in the case of BLM-depleted set), leaving 274 and 392 miRNAs, respectively. Differential expression of these miRNAs was then analyzed using ANOVA adjusted for age and gender for BS-NM samples. Exploratory analyses and visualizations were again performed using Partek.

**Ingenuity pathway analysis.** In order to better characterize *in vivo* roles of differentially-expressed genes, we used mRNA expression profiling results to perform an Ingenuity Pathway Analysis (IPA Ingenuity Systems, [www.ingenuity.com](http://www.ingenuity.com)) Core Analysis using default parameters. The output consisted of lists of Networks, Diseases, Biological Functions, and Canonical Pathways enriched within a given sample type and differentially expressed gene list. IPA also identifies potential upstream regulators (i.e., which genes affect the expression of other genes), and predicts whether putative regulatory interactions are activating or repressive based on the magnitude and direction of gene expression changes.

**Gene set enrichment analyses.** In order to investigate biological categories of genes and pathways altered in BS and BLM-depleted samples, we performed a Gene Set Enrichment Analysis (GSEA) on BS primary fibroblast and 82-6 cell strain data using the *romer* function in the *limma* package (7). *Romer* is a gene set enrichment analysis program for linear models using rotation tests (ROtation testing using MEan Ranks). *Romer* considers all genes in an experiment, and allows the identification of gene sets with strong cross-correlation by boosting the signal-to-noise ratio. This makes it possible to confidently detect even modest changes in gene expression. We used *romer* to perform GSEA using the 15 gene set collections contained in the Molecular Signature Database version 4.0 (12) ([http://www.broad.mit.edu/gsea/msigdb/msigdb\\_index.html](http://www.broad.mit.edu/gsea/msigdb/msigdb_index.html)).

We also determined which genes that were significantly altered in both BS primary fibroblasts and BLM-depleted 82-6 cells were over-represented in statistically significant gene sets. The p-values for

the intersection of the common genes with the gene sets were calculated with the R package's `phyper` function (13), which uses a hypergeometric distribution and sampling *without* replacement. This is the same statistical test used to test associations in Gene Ontology analysis (14).

**miRNA targets analysis.** In order to determine whether differentially expressed miRNAs might be modulating gene expression in BLM-deficient cells, we used our miRNA expression profiling results to search miRTarBase (15) (<http://mirtarbase.mbc.nctu.edu.tw/>), a curated database of miRNA-target gene interactions that have been experimentally validated. Only targets validated by strong experimental methods such as reporter assay or immunoblotting were chosen for this analysis. We searched among the miRNA target gene lists to identify genes that were significantly differentially expressed in BS and/or BLM-depleted cells. A hypergeometric test was then performed to determine the significance of the association of a given miRNA with differentially expressed genes as compared with the expectation from chance alone.

**G4 enrichment statistics.** In order to determine the frequency of G4 DNA motifs near TSS and in the first intron of genes in the hg19 human genome, the RefSeq Gene table and FASTA genome sequence for the hg19 human genome were downloaded from the UCSC Genome Browser Database (16) G4 motifs were located in the hg19 genome using Quadparser (17) with settings for 4 or more runs of 3 or more consecutive Gs separated by 1-12 nt loops on either strand of the genome (GC 3 4 1 12) in DAS format. Quadparser results were converted to BED format using Perl scripts. This resulted in 722,264 G4 motif annotations. R scripts were used to select regions near RefSeq TSS (-250bp to TSS, TSS to +250 bp, and the first 250 bp of the first intron), and to calculate the number of G4 motifs that overlapped these regions on each strand relative to the direction of gene transcription (template and non-template) for each gene surveyed in the expression arrays. Genes from expression arrays were matched to RefSeq regions using mRNA accessions. Of 17,318 expression array genes, 16,745 were matched to TSS in the RefSeq table (>96%). For the same 17,318 array genes, 15,728 genes were matched to Intron 1 locations (>90%).

The gene sets used for G4 analysis were those with altered expression ( $\geq 1.5$ -fold up or down-regulated) in BS patients (BS) compared to matched normal controls (NM), or in BLM-depleted control primary fibroblasts (BLM) versus the same cells treated with a non-specific shRNA (NS). Genes up- or down-regulated  $\geq 1.5$ -fold in the NS samples compared to an untreated control were excluded. For each set, we calculated the number of genes in each set with 1 or more G4 motif, the average number of G4 motifs per gene, and the total number of G4s per gene for each gene set in each region (250bp to TSS, TSS to +250bp, and 5' end of intron 1) and for G4 motifs on each strand (both, non-template, and template). We also selected a list of all genes with a G4 motif on either strand among up- or down-regulated genes (Table S7A and Table S7B).

False discovery rates of G4 motif enrichment were empirically determined for each gene set by selecting 1000 gene sets each made up of an equal number of regions selected at random from the RefSeq-based region locations described above. False discovery rates were determined by calculating the fraction of the 1000 randomly selected sets with a higher or equal value or lower or equal value compared to the results tabulated among the genes with altered expression. A result of  $< 0.001$  means that the value found in the experimental set was not observed within the range of 1000 random matching sets. In Figure 3 we present only the FDR statistics for the sum of the G4 motifs over all of the regions in each set. Statistics for the number of genes with at least one G4 motif, and the average number of motifs per G4-containing gene and their respective FDRs are available in Supplemental Table S8.

In order to generate G4 motif frequency plots we took regions 250 bp up- or downstream of the TSS and 250 bp up or downstream of the 5' end of first introns for all genes on the expression arrays. Genes in the up- or down-regulated gene sets were selected from these region tables using mRNA accessions, as described above. G4 motif BED files for each strand of the genome (+ and -) and for both strands together were converted to BEDGraph files with a value of 1 for each position that a G4 motif overlapped. These BEDGraphs were converted to bigWig format for subsequent analysis using the UCSC Kent source utility `bedGraphToBigWig` (18). Perl scripts that utilized the `Bio::DB::BigWig` library from BioPerl (19) were used to calculate the frequency of overlap for each G4 motif set, at each



position relative to the TSS or 5' end of the first intron in each gene set. Frequency plots were generated using the R package ggplot2 (20)

### SI Materials and Methods references:

1. Dhillon KK, *et al.* (2008) Werner syndrome protein loss leads to divergent mouse and human cell phenotypes. *DNA Repair* 9:11-22.
2. Mao FJ, Sidorova JM, Lauper JM, Emond MJ, & Monnat RJ (2010) The human WRN and BLM RecQ helicases differentially regulate cell proliferation and survival after chemotherapeutic DNA damage. *Cancer Research* 70(16):6548-6555. PMID:PMC2941797.
3. Sidorova JM, Kehrli K, Mao F, & Monnat Jr R (2013) Distinct functions of human RECQ helicases WRN and BLM in replication fork recovery and progression after hydroxyurea-induced stalling. *DNA Repair* 12(2):128-139.
4. Moffat J, *et al.* (2006) A lentiviral RNAi library for human and mouse genes applied to an arrayed viral high-content screen. *Cell (Cambridge MA)* 124(6):1283-1298.
5. Mathé EA, *et al.* (2009) MicroRNA expression in squamous cell carcinoma and adenocarcinoma of the esophagus: associations with survival. *Clinical Cancer Research* 15(19):6192-6200.
6. Smyth GK (2004) Linear models and empirical bayes methods for assessing differential expression in microarray experiments. *Stat Appl Genet Mol Biol* 3(Article 3).
7. Gentleman R, *et al.* (2004) Bioconductor: open software development for computational biology and bioinformatics. *Genome Biology* 5(10):R80.
8. Allison DB, Cui X, Page GP, & Sabripour M (2006) Microarray data analysis: from disarray to consolidation and consensus. *Nat Rev Genet* 7(1):55-65.
9. Dabney A & Storey J (2006) A reanalysis of a published Affymetrix GeneChip control dataset. *Genome Biology* 7(3):401.
10. Tusher VG, Tibshirani R, & Chu G (2001) Significance analysis of microarrays applied to the ionizing radiation response. *Proceedings of the National Academy of Sciences* 98(9):5116-5121.
11. Efron B & Tibshirani R (2007) On testing the significance of sets of genes. *Annals of Applied Statistics* 1:1070129.
12. Subramanian A, *et al.* (2005) Gene set enrichment analysis: A knowledge-based approach for interpreting genome-wide expression profiles. *Proceedings of the National Academy of Sciences of the United States of America* 102(43):15545-15550.
13. Johnson NL, Kotz S, & Kemp AW (1992) *Univariate Discrete Distributions* (Wiley, New York) 2 Ed.
14. Ashburner M, *et al.* (2000) Gene Ontology: tool for the unification of biology. *Nat Genet* 25(1):25-29.
15. Hsu S-D, *et al.* (2010) miRTarBase: a database curates experimentally validated microRNA–target interactions. *Nucleic Acids Research*.
16. Meyer LR, *et al.* (2013) The UCSC Genome Browser database: extensions and updates 2013. *Nucleic Acids Research* 41(D1):D64-D69.
17. Huppert JL & Balasubramanian S (2005) Prevalence of quadruplexes in the human genome. *Nucleic Acids Research* 33(9):2908-2916.
18. Kent WJ, Zweig AS, Barber G, Hinrichs AS, & Karolchik D (2010) BigWig and BigBed: enabling browsing of large distributed datasets. *Bioinformatics* 26(17):2204-2207.
19. Stajich JE, *et al.* (2002) The Bioperl Toolkit: Perl modules for the life sciences. *Genome Research* 12(10):1611-1618.
20. Wickham H (2009) *ggplot2: Elegant Graphics for Data Analysis* (Springer, New York).

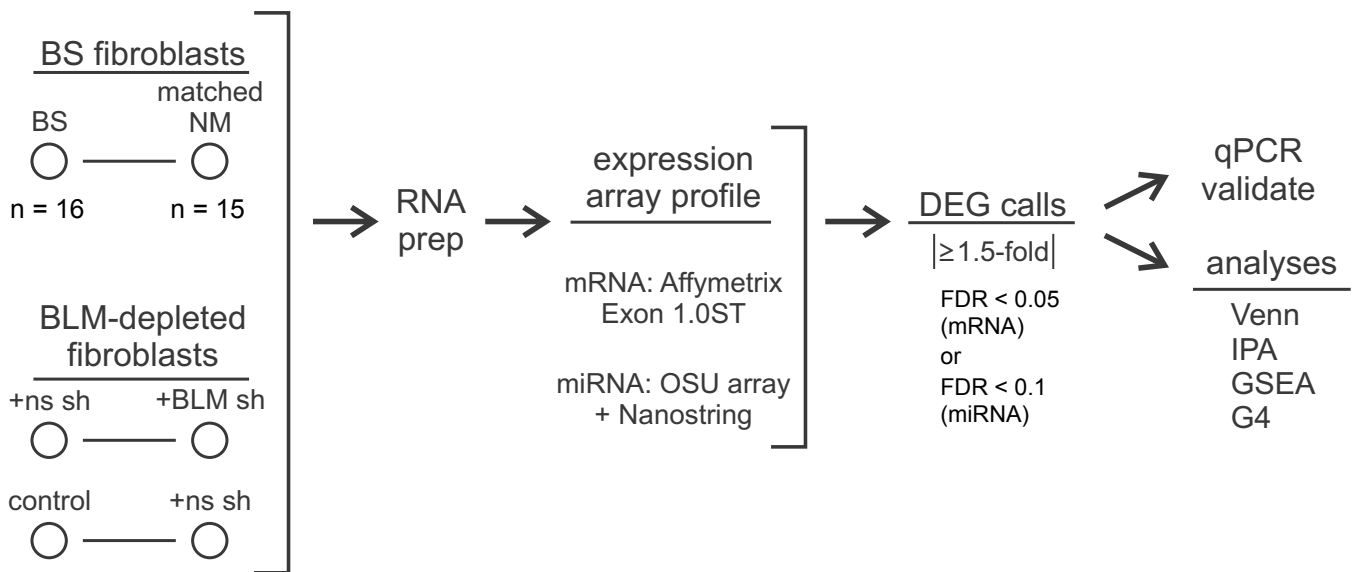

**Supplementary Figure S1: Study design and experimental workflow.** Messenger RNA and miRNA expression profiling analyses were performed using primary fibroblasts from Bloom syndrome patients (BS) and age-, gender- and passage-matched controls (NM), and an isogenic pair of control diploid human fibroblasts (strain 82-6) expressing either a *BLM*-specific (BLM sh) or nonspecific (ns sh) shRNA from a lentiviral expression vector. Differentially expressed mRNAs and miRNAs were identified on the basis of absolute fold changes in expression of  $\geq 1.5$ -fold under conditions where the false discovery rate (FDR) was  $< 0.05$  for mRNA and  $< 0.1$  for miRNA (see Methods for detail). A subset of both mRNA and miRNA expression changes were verified by quantitative PCR, prior to analyzing expression data using several different strategies (Venn overlap, gene set enrichment analyses (GSEA), analysis of expression as a function of G4 gene/miRNA content and by Ingenuity Pathway Analyses (IPA)).

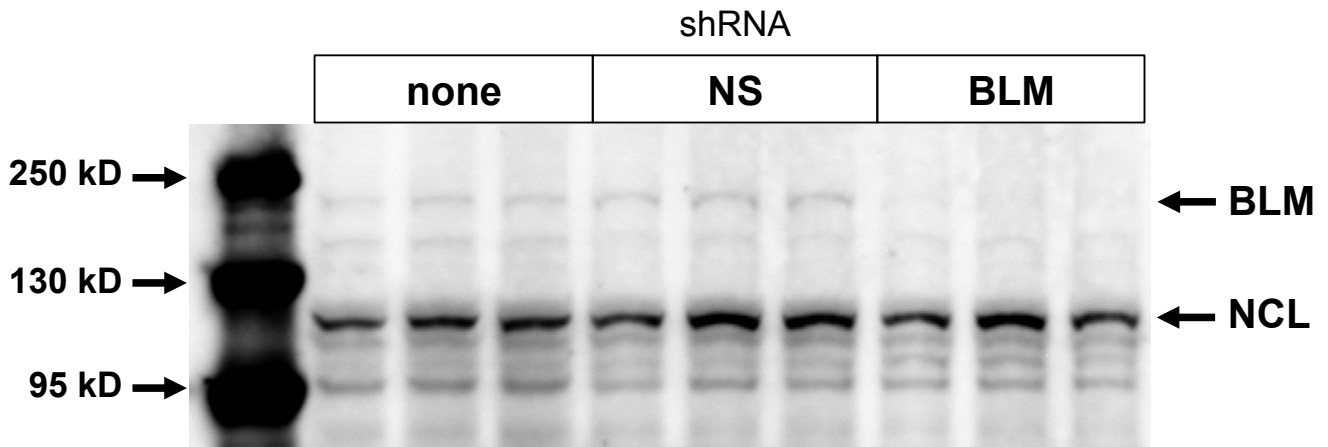

**Supplementary Figure S2: Immunoblot verification of BLM depletion from human fibroblasts.** Whole cell lysate from BLM-depleted and control 82-6 human diploid fibroblasts were immunoblotted with a human BLM-specific antibody to detect and quantify BLM protein expression. Controls included cells that were not depleted (none) or depleted with a non-specific, scrambled shRNA (NS). Each set of 3 lanes are samples from biological triplicate depletion experiments. The nuclear protein nucleolin was used as a loading control across all samples (NCL). Aliquots of the same sets of triplicate samples were used for mRNA/miRNA profiling analyses.

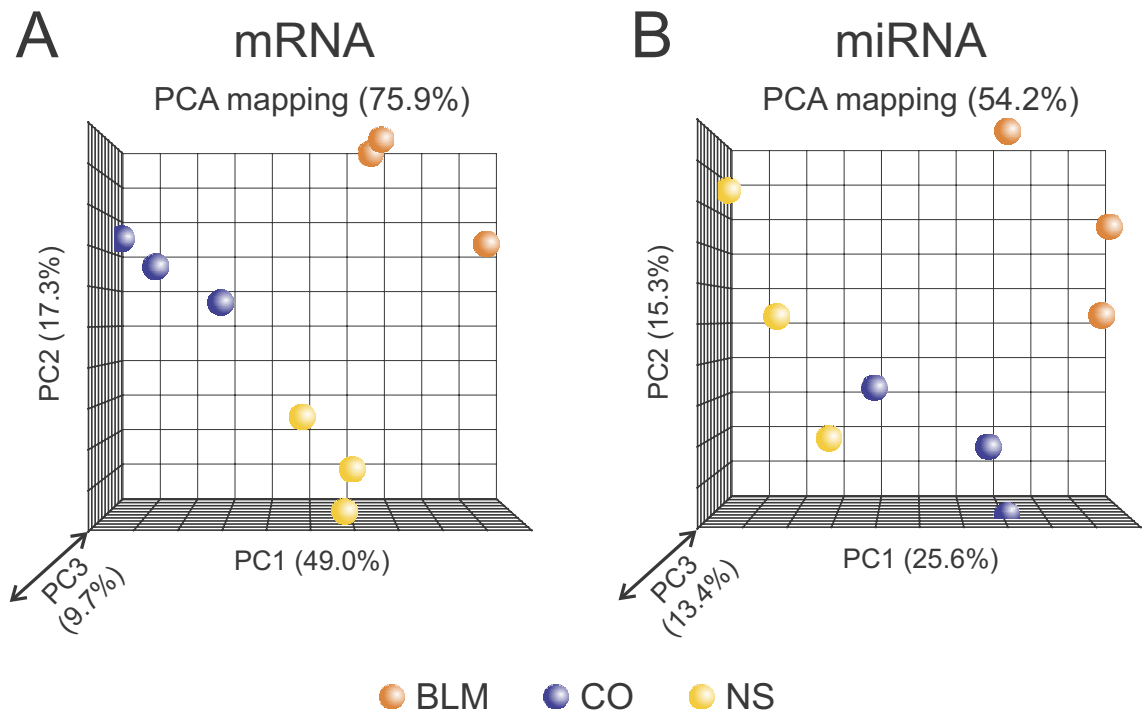

**Supplementary Figure S3:** Principal component analyses (PCA) of (A). mRNA expression and (B). miRNA expression in BLM-depleted (BLM, orange), non-specific shRNA depleted (NS, yellow) and normal control (CO, blue) primary human fibroblasts (strain 82-6) using average distance and linkage measures. Percentages indicate the portion of expression differences that can be attributed to specific principal components.

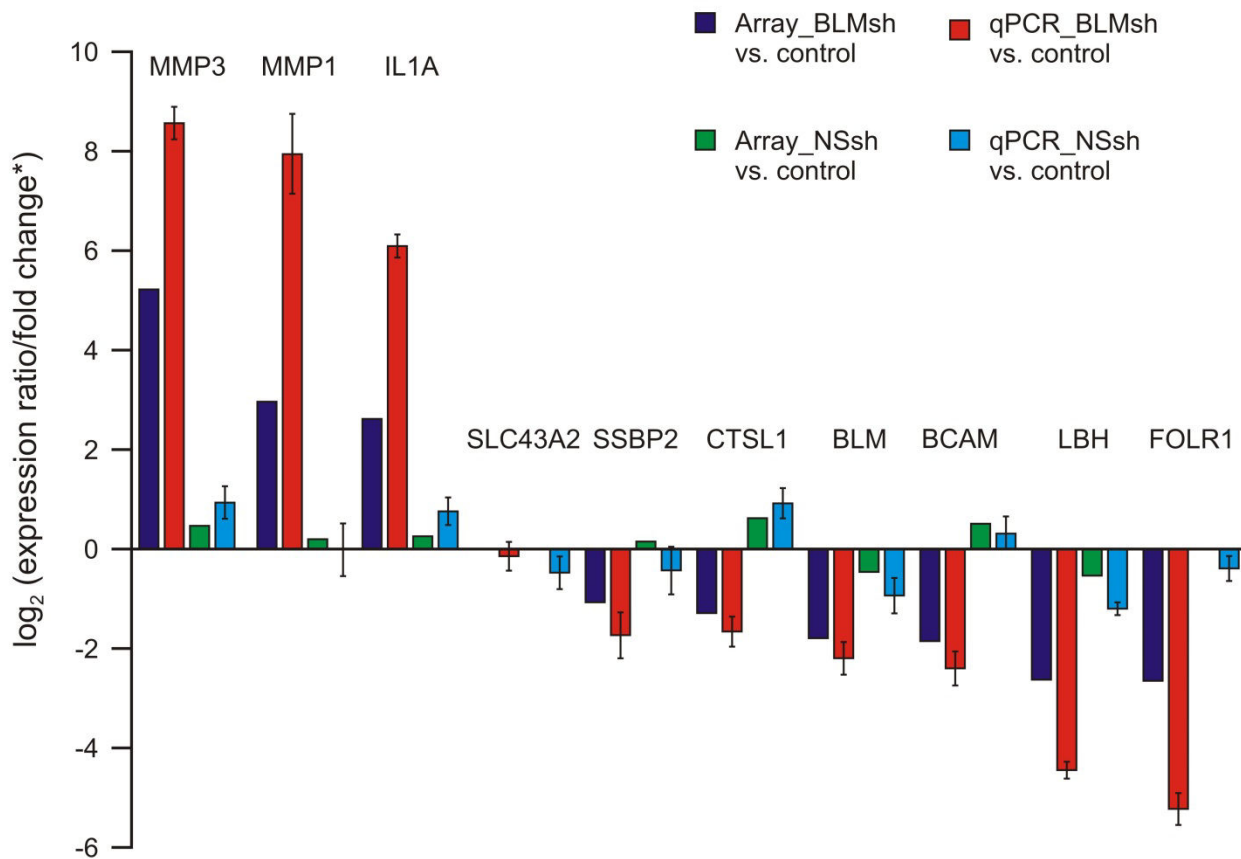

**Figure S4: qPCR verification of mRNA expression levels determined by microarray.** \*Expression ratios are plotted for initial array-based measurements, and fold changes for qPCR confirmatory assays.

**Methods:** RNA was reverse-transcribed using an Applied Biosystems High-Capacity cDNA Archive Kit (Applied Biosystems/AB, Foster City, CA). Expression levels for individual genes and miRNAs were evaluated in triplicate using Taqman Gene Expression Assays (ABI). Double-stranded cDNA for each sample was amplified for 40 cycles using the TaqMan Universal PCR Master Mix using the manufacturer's protocol on the 7500HT Sequence Detection System (ABI). For quality control, any samples with either an 18S rRNA or RNAU66 cycle value >20, or a gene or miRNA cycle value >36, were considered to be of poor quality and removed. Alternatively, PCR reactions were run following a 12-round pre-amplification on a BioMark 48.48 Dynamic Array System (Fluidigm, South San Francisco, CA), or a Rotor-Gene RG-3000 PCR machine (Qiagen, Germantown, MD, USA) according to the manufacturer's instructions. The gene mRNA or miRNA readings were then calculated using the comparative method ( $2^{-\Delta Ct}$ ), where Ct = threshold cycle and  $\Delta Ct = (Ct \text{ gene (or miRNA)} - Ct \text{ 18S rRNA (or RNAU66)})$ .

Table S1 BS patient and control detail

| Coriell reposit | Genotype                                                                                | Donor phenotype         | Age | Gender | No. passage | miRNA array | mRNA array |
|-----------------|-----------------------------------------------------------------------------------------|-------------------------|-----|--------|-------------|-------------|------------|
| <b>(N=16)</b>   |                                                                                         |                         |     |        |             |             |            |
| GM 01492        | homozygous (2281delT of RECQL3) and T>G transversion resulting a transcatcd p53 protein | Bloom syndrome          | 15  | M      | 18          | included    | included   |
| GM 03498        | compound heterozygous (2281delT and 3233delT of RECQL3 gene)                            | Bloom syndrome          | 4   | M      | 15          | included    | included   |
| GM 03402        | homozygous (2281delT of RECQL3 gene)                                                    | Bloom syndrome          | 30  | M      | 12          | included    | included   |
| GM 05289        | homozygous (1544insA of RECQL3 gene)                                                    | Bloom syndrome          | 5   | F      | 18          | included    | included   |
| GM 16882        | compound heterozygous (3261delT and 2281delT of RECQL3 gene)                            | Bloom syndrome          | 3   | F      | 19          | included    | included   |
| GM 16886        | Q700X missen mutation in BLM protein                                                    | Bloom syndrome          | 7   | M      | 20          | included    | included   |
| GM 16881        | homozyguous (2293delC of RECQL3 gene)                                                   | Bloom syndrome          | 31  | M      | 17          | included    | included   |
| GM 02520        | compound hererozygous (2293delC and deletion of exon 15 resulting in a frameshift )     | Bloom syndrome          | 10  | F      | 15          | included    | included   |
| GM 02548        | compound hererozygous (1544insA and T2328C transition of the RECQL3 gene)               | Bloom syndrome          | 6   | M      | 12          | included    | included   |
| GM 00811        | homozygous (6-bp del/7-bp insertion at nucleotide 2281 of REQL3 gene)                   | Bloom syndrome          | 4   | M      | 30          | included    | no         |
| GM 16883        | compound heterozygous ([2015A>G] and [IVS5-2A>G] of RECQL3 gene)                        | Bloom syndrome          | 25  | F      | 13          | included    | included   |
| GM 16859        | homozygous (6-bp del/7-bp ins] at nucleotide 2,281 of RECQL3 gene)                      | Bloom syndrome          | 43  | F      | 10          | included    | included   |
| GM 02932        | homozygous (6-bp del/7-bp insertion at nucleotide 2281 of REQL3 gene)                   | Bloom syndrome          | 28  | M      | 11          | included    | included   |
| GM 02085        | homozygous (6-bp del/7-bp insertion at nucleotide 2281 of REQL3 gene)                   | Bloom syndrome          | 2   | F      | 30          | included    | included   |
| GM 16890        | homozygous (Q645X missen mutation of BLM protein)                                       | Bloom syndrome          | 30  | F      | Unknown     | included    | no         |
| GM 16891        | homozygous (Q645X missen mutation of BLM protein)                                       | Bloom syndrome          | 13  | M      | Unknown     | included    | included   |
| <b>(N=15)</b>   |                                                                                         |                         |     |        |             |             |            |
| GM 02185        | Wildtype                                                                                | Not clinically affected | 36  | M      | 13          | included    | no         |
| GM 07532        | Wildtype                                                                                | Not clinically affected | 16  | F      | 12          | included    | included   |
| GM 00408        | Wildtype                                                                                | Not clinically affected | 5   | M      | 19          | included    | included   |
| GM 00497        | Wildtype                                                                                | Not clinically affected | 4   | M      | 19          | included    | included   |
| GM 00499        | Wildtype                                                                                | Not clinically affected | 8   | M      | 15          | included    | no         |
| GM 00969        | Wildtype                                                                                | Not clinically affected | 2   | F      | 17          | included    | included   |
| GM 02674        | Wildtype                                                                                | Not clinically affected | 29  | F      | 14          | included    | included   |
| GM 03377        | Wildtype                                                                                | Not clinically affected | 19  | M      | 9           | included    | included   |
| GM 01651        | Wildtype                                                                                | Not clinically affected | 13  | F      | 16          | included    | included   |
| GM 03651        | Wildtype                                                                                | Not clinically affected | 25  | F      | 13          | included    | no         |
| GM 04260        | Wildtype                                                                                | Not clinically affected | 60  | M      | 16          | included    | included   |
| GM 08398        | Wildtype                                                                                | Not clinically affected | 8   | M      | 7           | included    | included   |
| GM 01948        | Wildtype                                                                                | Not clinically affected | 27  | F      | 6           | included    | included   |
| GM 08402        | Wildtype                                                                                | Not clinically affected | 32  | M      | 11          | no          | included   |
| GM 00730        | Wildtype                                                                                | Not clinically affected | 45  | F      | 9           | included    | included   |

**Table S2A. Significantly differentially expressed mRNAs identified in BS compared with matched control human fibroblasts**

| Probe Set ID | Gene Symbol     | Gene Description                                                                       | log <sub>2</sub> (ER) | unadjusted P-Value | FDR   |
|--------------|-----------------|----------------------------------------------------------------------------------------|-----------------------|--------------------|-------|
| 3919033      | <b>SLC5A3</b>   | solute carrier family 5 (sodium/myo-inositol cotransporter), member 3                  | 2.59                  | 0.000              | 0.004 |
| 3388807      | <b>MMP1</b>     | matrix metalloproteinase 1 (interstitial collagenase)                                  | 2.24                  | 0.001              | 0.007 |
| 7385515      | <b>MALAT1</b>   | metastasis associated lung adenocarcinoma transcript 1 (non-protein coding)            | 2.06                  | 0.001              | 0.009 |
| 3770632      | <b>SUMO2</b>    | SMT3 suppressor of mif two 3 homolog 2 (S. cerevisiae)                                 | 1.88                  | 0.001              | 0.008 |
| 3151086      | <b>HAS2</b>     | hyaluronan synthase 2                                                                  | 1.86                  | 0.002              | 0.013 |
| 3843662      | <b>ZNF587</b>   | zinc finger protein 587                                                                | 1.76                  | 0.000              | 0.003 |
| 2786322      | <b>SLC7A11</b>  | solute carrier family 7, (cationic amino acid transporter, y+ system) member 11        | 1.76                  | 0.001              | 0.009 |
| 3385769      | <b>CTSC</b>     | cathepsin C                                                                            | 1.73                  | 0.000              | 0.002 |
| 2857416      | <b>IL6ST</b>    | interleukin 6 signal transducer (gp130, oncostatin M receptor)                         | 1.70                  | 0.000              | 0.001 |
| 2646818      | <b>ZIC1</b>     | Zic family member 1 (odd-paired homolog, Drosophila)                                   | 1.68                  | 0.000              | 0.004 |
| 2423829      | <b>ARHGAP29</b> | Rho GTPase activating protein 29                                                       | 1.68                  | 0.000              | 0.002 |
| 2741236      | <b>USP53</b>    | ubiquitin specific peptidase 53                                                        | 1.66                  | 0.000              | 0.006 |
| 2686023      | <b>DCBLD2</b>   | discoidin, CUB and LCCL domain containing 2                                            | 1.64                  | 0.000              | 0.001 |
| 3812074      | <b>DSEL</b>     | dermatan sulfate epimerase-like                                                        | 1.64                  | 0.000              | 0.003 |
| 2991233      | <b>AHR</b>      | aryl hydrocarbon receptor                                                              | 1.63                  | 0.000              | 0.001 |
| 2652027      | <b>CLDN11</b>   | claudin 11                                                                             | 1.63                  | 0.002              | 0.012 |
| 3449068      | <b>TMTC1</b>    | transmembrane and tetratricopeptide repeat containing 1                                | 1.63                  | 0.000              | 0.004 |
| 3296046      | <b>KCNMA1</b>   | potassium large conductance calcium-activated channel, subfamily M, alpha member 1     | 1.62                  | 0.000              | 0.001 |
| 2816459      | <b>F2R</b>      | coagulation factor II (thrombin) receptor                                              | 1.59                  | 0.000              | 0.002 |
| 2565902      | <b>ANKRD36B</b> | ankyrin repeat domain 36B                                                              | 1.56                  | 0.004              | 0.016 |
| 3041122      | <b>MGC87042</b> | STEAP family protein MGC87042                                                          | 1.51                  | 0.003              | 0.014 |
| 2720584      | <b>SLIT2</b>    | slit homolog 2 (Drosophila)                                                            | 1.49                  | 0.000              | 0.002 |
| 2649367      | <b>PTX3</b>     | pentraxin 3, long                                                                      | 1.48                  | 0.010              | 0.027 |
| 3766960      | <b>SMURF2</b>   | SMAD specific E3 ubiquitin protein ligase 2                                            | 1.45                  | 0.000              | 0.003 |
| 2733360      | <b>FGF5</b>     | fibroblast growth factor 5                                                             | 1.42                  | 0.000              | 0.006 |
| 3376556      | <b>ATL3</b>     | atlastin GTPase 3                                                                      | 1.40                  | 0.001              | 0.009 |
| 2815043      | <b>TNPO1</b>    | transportin 1                                                                          | 1.37                  | 0.000              | 0.002 |
| 2514566      | <b>SSB</b>      | Sjogren syndrome antigen B (autoantigen La)                                            | 1.34                  | 0.003              | 0.015 |
| 2580802      | <b>RND3</b>     | Rho family GTPase 3                                                                    | 1.33                  | 0.000              | 0.003 |
| 2992814      | <b>GNMB</b>     | glycoprotein (transmembrane) nmb                                                       | 1.33                  | 0.000              | 0.005 |
| 3325503      | <b>RCN1</b>     | reticulocalbin 1, EF-hand calcium binding domain                                       | 1.32                  | 0.005              | 0.018 |
| 3020302      | <b>CAV1</b>     | caveolin 1, caveolae protein, 22kDa                                                    | 1.29                  | 0.000              | 0.003 |
| 3319840      | <b>IPO7</b>     | importin 7                                                                             | 1.28                  | 0.000              | 0.003 |
| 3059464      | <b>SEMA3A</b>   | sema domain, immunoglobulin domain (Ig), short basic domain, secreted, (semaphorin) 3A | 1.28                  | 0.000              | 0.005 |
| 3253438      | <b>RPS24</b>    | ribosomal protein S24                                                                  | 1.28                  | 0.020              | 0.041 |
| 2417174      | <b>SERBP1</b>   | SERPINE1 mRNA binding protein 1                                                        | 1.26                  | 0.004              | 0.017 |
| 3890333      | <b>TFAP2C</b>   | transcription factor AP-2 gamma (activating enhancer binding protein 2 gamma)          | 1.26                  | 0.000              | 0.006 |
| 2750594      | <b>SC4MOL</b>   | sterol-C4-methyl oxidase-like                                                          | 1.26                  | 0.000              | 0.005 |
| 3774906      | <b>SECTM1</b>   | secreted and transmembrane 1                                                           | 1.26                  | 0.001              | 0.009 |
| 3464983      | <b>ATP2B1</b>   | ATPase, Ca <sup>++</sup> transporting, plasma membrane 1                               | 1.25                  | 0.000              | 0.005 |
| 2592268      | <b>STAT1</b>    | signal transducer and activator of transcription 1, 91kDa                              | 1.25                  | 0.002              | 0.011 |
| 3292448      | <b>HERC4</b>    | hect domain and RLD 4                                                                  | 1.25                  | 0.000              | 0.001 |
| 2422722      | <b>TGFBR3</b>   | transforming growth factor, beta receptor III                                          | 1.24                  | 0.011              | 0.030 |
| 3759335      | <b>GJC1</b>     | gap junction protein, gamma 1, 45kDa                                                   | 1.24                  | 0.000              | 0.006 |
| 2809245      | <b>ITGA2</b>    | integrin, alpha 2 (CD49B, alpha 2 subunit of VLA-2 receptor)                           | 1.23                  | 0.006              | 0.022 |
| 2362394      | <b>IFI16</b>    | interferon, gamma-inducible protein 16                                                 | 1.23                  | 0.000              | 0.006 |
| 3718555      | <b>SLFN5</b>    | schlafen family member 5                                                               | 1.23                  | 0.000              | 0.005 |
| 3021158      | <b>C7ORF58</b>  | chromosome 7 open reading frame 58                                                     | 1.22                  | 0.000              | 0.004 |
| 2711644      | <b>ATP13A3</b>  | ATPase type 13A3                                                                       | 1.22                  | 0.000              | 0.005 |
| 2352228      | <b>CAPZA1</b>   | capping protein (actin filament) muscle Z-line, alpha 1                                | 1.22                  | 0.000              | 0.003 |
| 2593670      | <b>SF3B1</b>    | splicing factor 3b, subunit 1, 155kDa                                                  | 1.21                  | 0.000              | 0.003 |
| 2512330      | <b>MARCH7</b>   | membrane-associated ring finger (C3HC4) 7                                              | 1.21                  | 0.000              | 0.003 |
| 2473571      | <b>RAB10</b>    | RAB10, member RAS oncogene family                                                      | 1.20                  | 0.000              | 0.003 |
| 2626167      | <b>PXK</b>      | PX domain containing serine/threonine kinase                                           | 1.20                  | 0.000              | 0.004 |
| 2434609      | <b>CTSK</b>     | cathepsin K                                                                            | 1.20                  | 0.024              | 0.047 |
| 2659577      | <b>PAK2</b>     | p21 protein (Cdc42/Rac)-activated kinase 2                                             | 1.19                  | 0.000              | 0.003 |
| 2406064      | <b>SFPQ</b>     | splicing factor proline/glutamine-rich                                                 | 1.19                  | 0.000              | 0.004 |
| 3058944      | <b>HGF</b>      | hepatocyte growth factor (hepapoietin A; scatter factor)                               | 1.18                  | 0.009              | 0.026 |
| 2879509      | <b>YIPF5</b>    | Yip1 domain family, member 5                                                           | 1.18                  | 0.000              | 0.003 |
| 3190659      | <b>SET</b>      | SET nuclear oncogene                                                                   | 1.18                  | 0.000              | 0.006 |
| 2940551      | <b>SSR1</b>     | signal sequence receptor, alpha                                                        | 1.18                  | 0.000              | 0.002 |

|         |                   |                                                                                                                                             |      |       |       |
|---------|-------------------|---------------------------------------------------------------------------------------------------------------------------------------------|------|-------|-------|
| 3472755 | <b>TBX3</b>       | T-box 3                                                                                                                                     | 1.17 | 0.000 | 0.006 |
| 3353876 | <b>OR10G9</b>     | olfactory receptor, family 10, subfamily G, member 9                                                                                        | 1.17 | 0.001 | 0.010 |
| 3807474 | <b>C18ORF32</b>   | chromosome 18 open reading frame 32                                                                                                         | 1.17 | 0.002 | 0.010 |
| 2997376 | <b>ANLN</b>       | anillin, actin binding protein                                                                                                              | 1.17 | 0.007 | 0.022 |
| 2584018 | <b>DPP4</b>       | dipeptidyl-peptidase 4                                                                                                                      | 1.17 | 0.006 | 0.021 |
| 2976360 | <b>PERP</b>       | PERP, TP53 apoptosis effector                                                                                                               | 1.16 | 0.000 | 0.002 |
| 2500615 | <b>TMEM87B</b>    | transmembrane protein 87B                                                                                                                   | 1.15 | 0.000 | 0.001 |
| 3729172 | <b>CLTC</b>       | clathrin, heavy chain (Hc)                                                                                                                  | 1.15 | 0.000 | 0.002 |
| 3415046 | <b>FLJ33996</b>   | hypothetical protein FLJ33996                                                                                                               | 1.15 | 0.001 | 0.006 |
| 3505319 | <b>SACS</b>       | spastic ataxia of Charlevoix-Saguenay (sacsin)                                                                                              | 1.15 | 0.000 | 0.005 |
| 2347096 | <b>DR1</b>        | down-regulator of transcription 1, TBP-binding (negative cofactor 2)                                                                        | 1.14 | 0.000 | 0.005 |
| 2601414 | <b>SERPINE2</b>   | serpin peptidase inhibitor, clade E (nexin, plasminogen activator inhibitor type 1), member 2                                               | 1.14 | 0.000 | 0.003 |
| 3550392 | <b>PAPOLA</b>     | poly(A) polymerase alpha                                                                                                                    | 1.14 | 0.000 | 0.004 |
| 2571979 | <b>SLC35F5</b>    | solute carrier family 35, member F5                                                                                                         | 1.14 | 0.000 | 0.003 |
| 2404819 | <b>PTP4A2</b>     | protein tyrosine phosphatase type IVA, member 2                                                                                             | 1.13 | 0.001 | 0.007 |
| 3715109 | <b>WSB1</b>       | WD repeat and SOCS box-containing 1                                                                                                         | 1.13 | 0.001 | 0.008 |
| 2831124 | <b>MATR3</b>      | matrin 3                                                                                                                                    | 1.13 | 0.000 | 0.002 |
| 3564872 | <b>GPNAT1</b>     | glucosamine-phosphate N-acetyltransferase 1                                                                                                 | 1.13 | 0.001 | 0.007 |
| 2583602 | <b>RBMS1</b>      | RNA binding motif, single stranded interacting protein 1                                                                                    | 1.13 | 0.001 | 0.007 |
| 3058759 | <b>SEMA3C</b>     | sema domain, immunoglobulin domain (Ig), short basic domain, secreted, (semaphorin) 3C                                                      | 1.12 | 0.002 | 0.010 |
| 2930753 | <b>C6ORF72</b>    | chromosome 6 open reading frame 72                                                                                                          | 1.12 | 0.001 | 0.008 |
| 3462816 | <b>PHLDA1</b>     | pleckstrin homology-like domain, family A, member 1                                                                                         | 1.12 | 0.000 | 0.002 |
| 2911903 | <b>PTP4A1</b>     | protein tyrosine phosphatase type IVA, member 1                                                                                             | 1.12 | 0.000 | 0.003 |
| 2766456 | <b>UGDH</b>       | UDP-glucose 6-dehydrogenase                                                                                                                 | 1.12 | 0.000 | 0.005 |
| 3103187 | <b>TERF1</b>      | telomeric repeat binding factor (NIMA-interacting) 1                                                                                        | 1.11 | 0.000 | 0.003 |
| 3082590 | <b>LOC286161</b>  | hypothetical protein LOC286161                                                                                                              | 1.11 | 0.011 | 0.029 |
| 3429312 | <b>HSP90B1</b>    | heat shock protein 90kDa beta (Grp94), member 1                                                                                             | 1.11 | 0.001 | 0.008 |
| 2714818 | <b>CRIPAK</b>     | cysteine-rich PAK1 inhibitor                                                                                                                | 1.11 | 0.003 | 0.015 |
| 2945677 | <b>C6ORF62</b>    | chromosome 6 open reading frame 62                                                                                                          | 1.11 | 0.000 | 0.004 |
| 3434393 | <b>DYNLL1</b>     | dynein, light chain, LC8-type 1                                                                                                             | 1.11 | 0.004 | 0.018 |
| 2911372 | <b>BAG2</b>       | BCL2-associated athanogene 2                                                                                                                | 1.11 | 0.000 | 0.001 |
| 3942648 | <b>TUG1</b>       | taurine upregulated 1 (non-protein coding)                                                                                                  | 1.11 | 0.000 | 0.006 |
| 3464747 | <b>KITLG</b>      | KIT ligand                                                                                                                                  | 1.10 | 0.000 | 0.004 |
| 3344990 | <b>PANX1</b>      | pannexin 1                                                                                                                                  | 1.10 | 0.000 | 0.001 |
| 3061651 | <b>BET1</b>       | blocked early in transport 1 homolog ( <i>S. cerevisiae</i> )                                                                               | 1.10 | 0.000 | 0.004 |
| 3624697 | <b>ARPP19</b>     | cAMP-regulated phosphoprotein, 19kDa                                                                                                        | 1.10 | 0.001 | 0.010 |
| 2712632 | <b>TFRC</b>       | transferrin receptor (p90, CD71)                                                                                                            | 1.10 | 0.000 | 0.004 |
| 2876257 | <b>SAR1B</b>      | SAR1 homolog B ( <i>S. cerevisiae</i> )                                                                                                     | 1.09 | 0.000 | 0.004 |
| 2336271 | <b>BTF3L4</b>     | basic transcription factor 3-like 4                                                                                                         | 1.09 | 0.001 | 0.009 |
| 3362934 | <b>ZBED5</b>      | zinc finger, BED-type containing 5                                                                                                          | 1.09 | 0.000 | 0.004 |
| 2643157 | <b>CDV3</b>       | CDV3 homolog (mouse)                                                                                                                        | 1.09 | 0.000 | 0.002 |
| 3764738 | <b>SKA2</b>       | spindle and kinetochore associated complex subunit 2                                                                                        | 1.09 | 0.002 | 0.010 |
| 2847967 | <b>SEMA5A</b>     | sema domain, seven thrombospondin repeats (type 1 and type 1-like), transmembrane domain (TM) and short cytoplasmic domain, (semaphorin) 5A | 1.08 | 0.002 | 0.010 |
| 2921374 | <b>RPF2</b>       | ribosome production factor 2 homolog ( <i>S. cerevisiae</i> )                                                                               | 1.08 | 0.008 | 0.024 |
| 3301857 | <b>TM9SF3</b>     | transmembrane 9 superfamily member 3                                                                                                        | 1.08 | 0.001 | 0.009 |
| 2815791 | <b>HEXB</b>       | hexosaminidase B (beta polypeptide)                                                                                                         | 1.08 | 0.000 | 0.001 |
| 3174816 | <b>ANXA1</b>      | annexin A1                                                                                                                                  | 1.07 | 0.000 | 0.006 |
| 3103523 | <b>LY96</b>       | lymphocyte antigen 96                                                                                                                       | 1.07 | 0.000 | 0.002 |
| 2395177 | <b>ERRF1</b>      | ERBB receptor feedback inhibitor 1                                                                                                          | 1.07 | 0.000 | 0.005 |
| 2693081 | <b>ZNF148</b>     | zinc finger protein 148                                                                                                                     | 1.07 | 0.000 | 0.004 |
| 3002640 | <b>EGFR</b>       | epidermal growth factor receptor                                                                                                            | 1.07 | 0.000 | 0.001 |
| 2635641 | <b>PVRL3</b>      | poliovirus receptor-related 3                                                                                                               | 1.06 | 0.000 | 0.004 |
| 3764103 | <b>SRSF1</b>      | serine/arginine-rich splicing factor 1                                                                                                      | 1.06 | 0.000 | 0.004 |
| 2961317 | <b>TMEM30A</b>    | transmembrane protein 30A                                                                                                                   | 1.06 | 0.000 | 0.006 |
| 2838598 | <b>CCNG1</b>      | cyclin G1                                                                                                                                   | 1.06 | 0.000 | 0.002 |
| 3107342 | <b>PDP1</b>       | pyruvate dehydrogenase phosphatase catalytic subunit 1                                                                                      | 1.06 | 0.000 | 0.005 |
| 3623865 | <b>SPPL2A</b>     | signal peptide peptidase-like 2A                                                                                                            | 1.06 | 0.002 | 0.010 |
| 2551924 | <b>CALM2</b>      | calmodulin 2 (phosphorylase kinase, delta)                                                                                                  | 1.05 | 0.002 | 0.012 |
| 2813060 | <b>PIK3R1</b>     | phosphoinositide-3-kinase, regulatory subunit 1 (alpha)                                                                                     | 1.05 | 0.000 | 0.006 |
| 3087167 | <b>TUSC3</b>      | tumor suppressor candidate 3                                                                                                                | 1.05 | 0.000 | 0.002 |
| 2492496 | <b>NCRNA00152</b> | non-protein coding RNA 152                                                                                                                  | 1.05 | 0.012 | 0.032 |
| 2559807 | <b>MOBK1B</b>     | MOB1, Mps One Binder kinase activator-like 1B (yeast)                                                                                       | 1.05 | 0.000 | 0.004 |
| 3610110 | <b>NR2F2</b>      | nuclear receptor subfamily 2, group F, member 2                                                                                             | 1.05 | 0.001 | 0.009 |
| 3012019 | <b>CLDN12</b>     | claudin 12                                                                                                                                  | 1.04 | 0.000 | 0.003 |
| 3971877 | <b>EIF2S3</b>     | eukaryotic translation initiation factor 2, subunit 3 gamma, 52kDa                                                                          | 1.04 | 0.000 | 0.003 |
| 2369796 | <b>TOR1AIP1</b>   | torsin A interacting protein 1                                                                                                              | 1.04 | 0.000 | 0.001 |
| 2522439 | <b>BZW1</b>       | basic leucine zipper and W2 domains 1                                                                                                       | 1.04 | 0.002 | 0.013 |



|         |                  |                                                                              |      |       |       |
|---------|------------------|------------------------------------------------------------------------------|------|-------|-------|
| 3150455 | <b>TNFRSF11B</b> | tumor necrosis factor receptor superfamily, member 11b                       | 1.04 | 0.002 | 0.013 |
| 3771800 | <b>SRSF2</b>     | serine/arginine-rich splicing factor 2                                       | 1.04 | 0.000 | 0.002 |
| 3210808 | <b>GNAQ</b>      | guanine nucleotide binding protein (G protein), q polypeptide                | 1.04 | 0.001 | 0.007 |
| 3322048 | <b>C11ORF58</b>  | chromosome 11 open reading frame 58                                          | 1.04 | 0.006 | 0.022 |
| 2852333 | <b>ZFR</b>       | zinc finger RNA binding protein                                              | 1.04 | 0.000 | 0.002 |
| 2978026 | <b>FBXO30</b>    | F-box protein 30                                                             | 1.03 | 0.000 | 0.003 |
| 3938817 | <b>BMS1</b>      | BMS1 homolog, ribosome assembly protein (yeast)                              | 1.03 | 0.004 | 0.016 |
| 3904226 | <b>RBM39</b>     | RNA binding motif protein 39                                                 | 1.03 | 0.001 | 0.007 |
| 2975680 | <b>BCLAF1</b>    | BCL2-associated transcription factor 1                                       | 1.03 | 0.000 | 0.006 |
| 3766893 | <b>DDX5</b>      | DEAD (Asp-Glu-Ala-Asp) box polypeptide 5                                     | 1.03 | 0.000 | 0.005 |
| 3209623 | <b>ZFAND5</b>    | zinc finger, AN1-type domain 5                                               | 1.03 | 0.002 | 0.013 |
| 3471374 | <b>PPP1CC</b>    | protein phosphatase 1, catalytic subunit, gamma isozyme                      | 1.03 | 0.001 | 0.007 |
| 2910364 | <b>TMEM14A</b>   | transmembrane protein 14A                                                    | 1.03 | 0.000 | 0.004 |
| 3256560 | <b>MINPP1</b>    | multiple inositol-polyphosphate phosphatase 1                                | 1.03 | 0.000 | 0.005 |
| 2367154 | <b>BAT2L2</b>    | HLA-B associated transcript 2-like 2                                         | 1.03 | 0.000 | 0.004 |
| 3012978 | <b>GNG11</b>     | guanine nucleotide binding protein (G protein), gamma 11                     | 1.03 | 0.000 | 0.004 |
| 3393946 | <b>DDX6</b>      | DEAD (Asp-Glu-Ala-Asp) box polypeptide 6                                     | 1.03 | 0.000 | 0.005 |
| 2522094 | <b>SPATS2L</b>   | spermatogenesis associated, serine-rich 2-like                               | 1.02 | 0.000 | 0.004 |
| 2677653 | <b>C3ORF63</b>   | chromosome 3 open reading frame 63                                           | 1.02 | 0.000 | 0.005 |
| 2820925 | <b>RHOBTB3</b>   | Rho-related BTB domain containing 3                                          | 1.02 | 0.001 | 0.007 |
| 2649723 | <b>MFSD1</b>     | major facilitator superfamily domain containing 1                            | 1.02 | 0.000 | 0.004 |
| 3751463 | <b>NUFIP2</b>    | nuclear fragile X mental retardation protein interacting protein 2           | 1.02 | 0.000 | 0.006 |
| 3425134 | <b>TMTC3</b>     | transmembrane and tetratricopeptide repeat containing 3                      | 1.02 | 0.002 | 0.011 |
| 2707764 | <b>DCUN1D1</b>   | DCN1, defective in cullin neddylation 1, domain containing 1 (S. cerevisiae) | 1.02 | 0.000 | 0.006 |
| 3535515 | <b>FRMD6</b>     | FERM domain containing 6                                                     | 1.02 | 0.003 | 0.014 |
| 3580179 | <b>HSP90AA1</b>  | heat shock protein 90kDa alpha (cytosolic), class A member 1                 | 1.02 | 0.004 | 0.016 |
| 2590736 | <b>NCKAP1</b>    | NCK-associated protein 1                                                     | 1.02 | 0.000 | 0.003 |
| 2806468 | <b>IL7R</b>      | interleukin 7 receptor                                                       | 1.02 | 0.002 | 0.011 |
| 2518428 | <b>SSFA2</b>     | sperm specific antigen 2                                                     | 1.02 | 0.000 | 0.001 |
| 2463864 | <b>CEP170</b>    | centrosomal protein 170kDa                                                   | 1.01 | 0.000 | 0.004 |
| 2548699 | <b>CYP1B1</b>    | cytochrome P450, family 1, subfamily B, polypeptide 1                        | 1.01 | 0.015 | 0.036 |
| 2732273 | <b>SEPT11</b>    | septin 11                                                                    | 1.01 | 0.002 | 0.011 |
| 2331822 | <b>ZMPSTE24</b>  | zinc metalloproteinase (STE24 homolog, S. cerevisiae)                        | 1.01 | 0.000 | 0.003 |
| 2958325 | <b>DST</b>       | dystonin                                                                     | 1.01 | 0.000 | 0.006 |
| 2738664 | <b>SGMS2</b>     | sphingomyelin synthase 2                                                     | 1.01 | 0.000 | 0.004 |
| 3764066 | <b>VEZF1</b>     | vascular endothelial zinc finger 1                                           | 1.01 | 0.000 | 0.003 |
| 2378256 | <b>SYT14</b>     | synaptotagmin XIV                                                            | 1.01 | 0.000 | 0.006 |
| 2500919 | <b>SLC20A1</b>   | solute carrier family 20 (phosphate transporter), member 1                   | 1.00 | 0.003 | 0.014 |
| 3538470 | <b>C14ORF135</b> | chromosome 14 open reading frame 135                                         | 1.00 | 0.001 | 0.009 |
| 3074640 | <b>LUZP6</b>     | leucine zipper protein 6                                                     | 1.00 | 0.000 | 0.005 |
| 3445908 | <b>EPS8</b>      | epidermal growth factor receptor pathway substrate 8                         | 1.00 | 0.000 | 0.006 |
| 3185063 | <b>UGCG</b>      | UDP-glucose ceramide glucosyltransferase                                     | 1.00 | 0.002 | 0.012 |
| 2812435 | <b>ERBB2IP</b>   | erbB2 interacting protein                                                    | 1.00 | 0.000 | 0.006 |
| 2325593 | <b>CLIC4</b>     | chloride intracellular channel 4                                             | 1.00 | 0.004 | 0.017 |
| 2971801 | <b>MAN1A1</b>    | mannosidase, alpha, class 1A, member 1                                       | 1.00 | 0.000 | 0.002 |
| 3519309 | <b>SPRY2</b>     | sprouty homolog 2 (Drosophila)                                               | 1.00 | 0.001 | 0.007 |
| 2879312 | <b>NR3C1</b>     | nuclear receptor subfamily 3, group C, member 1 (glucocorticoid receptor)    | 1.00 | 0.000 | 0.004 |
| 3969855 | <b>CA5B</b>      | carbonic anhydrase VB, mitochondrial                                         | 1.00 | 0.001 | 0.007 |
| 3320944 | <b>TEAD1</b>     | TEA domain family member 1 (SV40 transcriptional enhancer factor)            | 1.00 | 0.000 | 0.005 |
| 2417390 | <b>WLS</b>       | wntless homolog (Drosophila)                                                 | 0.99 | 0.019 | 0.041 |
| 3298977 | <b>GLUD1</b>     | glutamate dehydrogenase 1                                                    | 0.99 | 0.000 | 0.006 |
| 2924898 | <b>RNF146</b>    | ring finger protein 146                                                      | 0.99 | 0.002 | 0.011 |
| 2569908 | <b>SEPT10</b>    | septin 10                                                                    | 0.99 | 0.000 | 0.004 |
| 3988740 | <b>PGRMC1</b>    | progesterone receptor membrane component 1                                   | 0.99 | 0.000 | 0.006 |
| 2550522 | <b>ZFP36L2</b>   | zinc finger protein 36, C3H type-like 2                                      | 0.99 | 0.000 | 0.001 |
| 3105904 | <b>CPNE3</b>     | copine III                                                                   | 0.99 | 0.000 | 0.003 |
| 2417272 | <b>GNG12</b>     | guanine nucleotide binding protein (G protein), gamma 12                     | 0.98 | 0.000 | 0.004 |
| 2869880 | <b>EFNA5</b>     | ephrin-A5                                                                    | 0.98 | 0.003 | 0.015 |
| 3283991 | <b>KIF5B</b>     | kinesin family member 5B                                                     | 0.98 | 0.002 | 0.011 |
| 3628469 | <b>RPS27L</b>    | ribosomal protein S27-like                                                   | 0.98 | 0.017 | 0.038 |
| 3364759 | <b>PIK3C2A</b>   | phosphoinositide-3-kinase, class 2, alpha polypeptide                        | 0.98 | 0.005 | 0.019 |
| 3692895 | <b>NUDT21</b>    | nudix (nucleoside diphosphate linked moiety X)-type motif 21                 | 0.98 | 0.000 | 0.003 |
| 2915828 | <b>NT5E</b>      | 5'-nucleotidase, ecto (CD73)                                                 | 0.98 | 0.000 | 0.003 |
| 2821761 | <b>RGMB</b>      | RGM domain family, member B                                                  | 0.98 | 0.000 | 0.003 |
| 3143660 | <b>MMP16</b>     | matrix metalloproteinase 16 (membrane-inserted)                              | 0.97 | 0.003 | 0.015 |
| 3507798 | <b>UBL3</b>      | ubiquitin-like 3                                                             | 0.97 | 0.003 | 0.013 |
| 3299585 | <b>LIPA</b>      | lipase A, lysosomal acid, cholesterol esterase                               | 0.97 | 0.001 | 0.007 |
| 3589141 | <b>SPRED1</b>    | sprouty-related, EVH1 domain containing 1                                    | 0.97 | 0.000 | 0.002 |
| 2588066 | <b>ATF2</b>      | activating transcription factor 2                                            | 0.97 | 0.000 | 0.005 |

|         |                  |                                                                                          |      |       |       |
|---------|------------------|------------------------------------------------------------------------------------------|------|-------|-------|
| 2844203 | <b>CANX</b>      | calnexin                                                                                 | 0.97 | 0.000 | 0.005 |
| 2997097 | <b>SEPT7</b>     | septin 7                                                                                 | 0.97 | 0.001 | 0.008 |
| 3066818 | <b>NAMPT</b>     | nicotinamide phosphoribosyltransferase                                                   | 0.97 | 0.004 | 0.016 |
| 3024275 | <b>MKLN1</b>     | muskelin 1, intracellular mediator containing kelch motifs                               | 0.96 | 0.000 | 0.003 |
| 2659560 | <b>PIGX</b>      | phosphatidylinositol glycan anchor biosynthesis, class X                                 | 0.96 | 0.001 | 0.009 |
| 2815965 | <b>HMGR</b>      | 3-hydroxy-3-methylglutaryl-CoA reductase                                                 | 0.96 | 0.000 | 0.005 |
| 3218067 | <b>MRPL50</b>    | mitochondrial ribosomal protein L50                                                      | 0.96 | 0.000 | 0.006 |
| 2642887 | <b>CCRL1</b>     | chemokine (C-C motif) receptor-like 1                                                    | 0.96 | 0.010 | 0.028 |
| 3020273 | <b>CAV2</b>      | caveolin 2                                                                               | 0.96 | 0.000 | 0.004 |
| 2684187 | <b>GBE1</b>      | glucan (1,4-alpha-), branching enzyme 1                                                  | 0.96 | 0.000 | 0.005 |
| 3325680 | <b>EIF3M</b>     | eukaryotic translation initiation factor 3, subunit M                                    | 0.95 | 0.001 | 0.006 |
| 3178416 | <b>SPIN1</b>     | spindlin 1                                                                               | 0.95 | 0.000 | 0.004 |
| 2459173 | <b>PRO2012</b>   | hypothetical protein PRO2012                                                             | 0.95 | 0.004 | 0.016 |
| 3626555 | <b>ADAM10</b>    | ADAM metallopeptidase domain 10                                                          | 0.95 | 0.002 | 0.011 |
| 2548617 | <b>CDC42EP3</b>  | CDC42 effector protein (Rho GTPase binding) 3                                            | 0.95 | 0.001 | 0.010 |
| 3623424 | <b>COPS2</b>     | COP9 constitutive photomorphogenic homolog subunit 2 (Arabidopsis)                       | 0.95 | 0.000 | 0.004 |
| 3452323 | <b>SLC38A2</b>   | solute carrier family 38, member 2                                                       | 0.95 | 0.000 | 0.006 |
| 3565361 | <b>GMFB</b>      | glia maturation factor, beta                                                             | 0.95 | 0.002 | 0.010 |
| 2593159 | <b>STK17B</b>    | serine/threonine kinase 17b                                                              | 0.95 | 0.000 | 0.005 |
| 2649113 | <b>TIPARP</b>    | TCDD-inducible poly(ADP-ribose) polymerase                                               | 0.95 | 0.001 | 0.008 |
| 2819044 | <b>RASA1</b>     | RAS p21 protein activator (GTPase activating protein) 1                                  | 0.95 | 0.001 | 0.007 |
| 3716579 | <b>LRRC37BP1</b> | leucine rich repeat containing 37B pseudogene 1                                          | 0.95 | 0.000 | 0.005 |
| 3427098 | <b>ELK3</b>      | ELK3, ETS-domain protein (SRF accessory protein 2)                                       | 0.95 | 0.000 | 0.003 |
| 2979056 | <b>NUP43</b>     | nucleoporin 43kDa                                                                        | 0.94 | 0.000 | 0.006 |
| 2706297 | <b>TBL1XR1</b>   | transducin (beta)-like 1 X-linked receptor 1                                             | 0.94 | 0.002 | 0.010 |
| 3886639 | <b>YWHAB</b>     | tyrosine 3-monooxygenase/tryptophan 5-monooxygenase activation protein, beta polypeptide | 0.94 | 0.000 | 0.005 |
| 2423907 | <b>F3</b>        | coagulation factor III (thromboplastin, tissue factor)                                   | 0.94 | 0.008 | 0.025 |
| 2809831 | <b>GPX8</b>      | glutathione peroxidase 8 (putative)                                                      | 0.94 | 0.000 | 0.006 |
| 3402315 | <b>CD9</b>       | CD9 molecule                                                                             | 0.94 | 0.009 | 0.027 |
| 3566304 | <b>EXOC5</b>     | exocyst complex component 5                                                              | 0.94 | 0.000 | 0.005 |
| 3252036 | <b>PLAU</b>      | plasminogen activator, urokinase                                                         | 0.94 | 0.000 | 0.003 |
| 3304624 | <b>NT5C2</b>     | 5'-nucleotidase, cytosolic II                                                            | 0.94 | 0.001 | 0.009 |
| 3628923 | <b>FAM96A</b>    | family with sequence similarity 96, member A                                             | 0.94 | 0.002 | 0.010 |
| 3223872 | <b>RAB14</b>     | RAB14, member RAS oncogene family                                                        | 0.94 | 0.001 | 0.007 |
| 2835960 | <b>G3BP1</b>     | GTPase activating protein (SH3 domain) binding protein 1                                 | 0.94 | 0.000 | 0.005 |
| 3247818 | <b>BICC1</b>     | bicaudal C homolog 1 (Drosophila)                                                        | 0.94 | 0.001 | 0.008 |
| 2866704 | <b>ARRDC3</b>    | arrestin domain containing 3                                                             | 0.94 | 0.001 | 0.008 |
| 2774971 | <b>ANTXR2</b>    | anthrax toxin receptor 2                                                                 | 0.93 | 0.000 | 0.005 |
| 2687739 | <b>CD47</b>      | CD47 molecule                                                                            | 0.93 | 0.000 | 0.002 |
| 2677356 | <b>WNT5A</b>     | wingless-type MMTV integration site family, member 5A                                    | 0.93 | 0.005 | 0.019 |
| 3075531 | <b>ZC3HAV1L</b>  | zinc finger CCCH-type, antiviral 1-like                                                  | 0.93 | 0.001 | 0.008 |
| 2778856 | <b>TSPAN5</b>    | tetraspanin 5                                                                            | 0.93 | 0.000 | 0.002 |
| 3130161 | <b>GSR</b>       | glutathione reductase                                                                    | 0.93 | 0.000 | 0.006 |
| 2697792 | <b>COPB2</b>     | coatamer protein complex, subunit beta 2 (beta prime)                                    | 0.93 | 0.000 | 0.004 |
| 2791197 | <b>PDGFC</b>     | platelet derived growth factor C                                                         | 0.93 | 0.003 | 0.014 |
| 3996755 | <b>BRCC3</b>     | BRCA1/BRCA2-containing complex, subunit 3                                                | 0.93 | 0.001 | 0.010 |
| 3139882 | <b>TRAM1</b>     | translocation associated membrane protein 1                                              | 0.93 | 0.000 | 0.005 |
| 3463571 | <b>PPP1R12A</b>  | protein phosphatase 1, regulatory (inhibitor) subunit 12A                                | 0.93 | 0.002 | 0.013 |
| 2875555 | <b>AFF4</b>      | AF4/FMR2 family, member 4                                                                | 0.93 | 0.000 | 0.002 |
| 2520533 | <b>OBFC2A</b>    | oligonucleotide/oligosaccharide-binding fold containing 2A                               | 0.93 | 0.001 | 0.007 |
| 3927480 | <b>ADAMTS5</b>   | ADAM metallopeptidase with thrombospondin type 1 motif, 5                                | 0.93 | 0.014 | 0.034 |
| 2601648 | <b>DOCK10</b>    | dedicator of cytokinesis 10                                                              | 0.93 | 0.000 | 0.003 |
| 2870889 | <b>C5ORF13</b>   | chromosome 5 open reading frame 13                                                       | 0.92 | 0.012 | 0.031 |
| 2810458 | <b>GPBP1</b>     | GC-rich promoter binding protein 1                                                       | 0.92 | 0.000 | 0.005 |
| 3885464 | <b>TOP1</b>      | topoisomerase (DNA) I                                                                    | 0.92 | 0.000 | 0.004 |
| 2731831 | <b>USO1</b>      | USO1 vesicle docking protein homolog (yeast)                                             | 0.92 | 0.000 | 0.005 |
| 3363923 | <b>COPB1</b>     | coatamer protein complex, subunit beta 1                                                 | 0.92 | 0.001 | 0.008 |
| 2638962 | <b>DTX3L</b>     | deltex 3-like (Drosophila)                                                               | 0.92 | 0.009 | 0.026 |
| 2349043 | <b>SLC30A7</b>   | solute carrier family 30 (zinc transporter), member 7                                    | 0.92 | 0.000 | 0.002 |
| 3505781 | <b>PARP4</b>     | poly (ADP-ribose) polymerase family, member 4                                            | 0.92 | 0.000 | 0.003 |
| 2332566 | <b>PPCS</b>      | phosphopantothencysteine synthetase                                                      | 0.92 | 0.000 | 0.002 |
| 2375810 | <b>ZC3H11A</b>   | zinc finger CCCH-type containing 11A                                                     | 0.92 | 0.004 | 0.017 |
| 2602901 | <b>TRIP12</b>    | thyroid hormone receptor interactor 12                                                   | 0.92 | 0.000 | 0.003 |
| 3020444 | <b>CAPZA2</b>    | capping protein (actin filament) muscle Z-line, alpha 2                                  | 0.92 | 0.000 | 0.005 |
| 2696764 | <b>MSL2</b>      | male-specific lethal 2 homolog (Drosophila)                                              | 0.92 | 0.000 | 0.004 |
| 3109191 | <b>POLR2K</b>    | polymerase (RNA) II (DNA directed) polypeptide K, 7.0kDa                                 | 0.92 | 0.004 | 0.018 |
| 3284302 | <b>NRP1</b>      | neuropilin 1                                                                             | 0.92 | 0.000 | 0.005 |
| 3429754 | <b>KIAA1033</b>  | KIAA1033                                                                                 | 0.92 | 0.001 | 0.009 |
| 2830861 | <b>EGR1</b>      | early growth response 1                                                                  | 0.92 | 0.005 | 0.018 |

|         |                 |                                                                                                        |      |       |       |
|---------|-----------------|--------------------------------------------------------------------------------------------------------|------|-------|-------|
| 3146433 | <b>COX6C</b>    | cytochrome c oxidase subunit VIc                                                                       | 0.92 | 0.008 | 0.025 |
| 3388631 | <b>TMEM123</b>  | transmembrane protein 123                                                                              | 0.91 | 0.007 | 0.022 |
| 2364155 | <b>UHMK1</b>    | U2AF homology motif (UHM) kinase 1                                                                     | 0.91 | 0.000 | 0.003 |
| 2727226 | <b>PDGFRA</b>   | platelet-derived growth factor receptor, alpha polypeptide                                             | 0.91 | 0.000 | 0.004 |
| 3618333 | <b>MEIS2</b>    | Meis homeobox 2                                                                                        | 0.91 | 0.000 | 0.005 |
| 3638607 | <b>ANPEP</b>    | alanyl (membrane) aminopeptidase                                                                       | 0.91 | 0.000 | 0.002 |
| 3982811 | <b>SH3BGRL</b>  | SH3 domain binding glutamic acid-rich protein like                                                     | 0.91 | 0.003 | 0.014 |
| 3430389 | <b>C12ORF23</b> | chromosome 12 open reading frame 23                                                                    | 0.91 | 0.001 | 0.007 |
| 3631397 | <b>UACA</b>     | veal autoantigen with coiled-coil domains and ankyrin repeats                                          | 0.91 | 0.000 | 0.006 |
| 2345929 | <b>LRRC8C</b>   | leucine rich repeat containing 8 family, member C                                                      | 0.91 | 0.001 | 0.009 |
| 3153428 | <b>ASAP1</b>    | ArfGAP with SH3 domain, ankyrin repeat and PH domain 1                                                 | 0.90 | 0.000 | 0.005 |
| 3300350 | <b>IDE</b>      | insulin-degrading enzyme                                                                               | 0.90 | 0.001 | 0.007 |
| 3763270 | <b>MMD</b>      | monocyte to macrophage differentiation-associated                                                      | 0.90 | 0.020 | 0.042 |
| 3126191 | <b>PSD3</b>     | pleckstrin and Sec7 domain containing 3                                                                | 0.90 | 0.002 | 0.011 |
| 2973376 | <b>PTPRK</b>    | protein tyrosine phosphatase, receptor type, K                                                         | 0.90 | 0.000 | 0.004 |
| 3212919 | <b>ISCA1</b>    | iron-sulfur cluster assembly 1 homolog (S. cerevisiae)                                                 | 0.90 | 0.005 | 0.019 |
| 3352503 | <b>ARHGEF12</b> | Rho guanine nucleotide exchange factor (GEF) 12                                                        | 0.90 | 0.000 | 0.004 |
| 3311832 | <b>ADAM12</b>   | ADAM metallopeptidase domain 12                                                                        | 0.90 | 0.003 | 0.014 |
| 4019849 | <b>LAMP2</b>    | lysosomal-associated membrane protein 2                                                                | 0.90 | 0.000 | 0.004 |
| 2588827 | <b>NFE2L2</b>   | nuclear factor (erythroid-derived 2)-like 2                                                            | 0.90 | 0.000 | 0.005 |
| 3513883 | <b>KPNA3</b>    | karyopherin alpha 3 (importin alpha 4)                                                                 | 0.90 | 0.001 | 0.009 |
| 2905118 | <b>SRSF3</b>    | serine/arginine-rich splicing factor 3                                                                 | 0.90 | 0.001 | 0.010 |
| 2958670 | <b>RAB23</b>    | RAB23, member RAS oncogene family                                                                      | 0.89 | 0.001 | 0.007 |
| 3066751 | <b>SYPL1</b>    | synaptophysin-like 1                                                                                   | 0.89 | 0.000 | 0.003 |
| 2742109 | <b>FGF2</b>     | fibroblast growth factor 2 (basic)                                                                     | 0.89 | 0.016 | 0.037 |
| 2458082 | <b>WDR26</b>    | WD repeat domain 26                                                                                    | 0.89 | 0.000 | 0.003 |
| 3809826 | <b>ATP8B1</b>   | ATPase, aminophospholipid transporter, class I, type 8B, member 1                                      | 0.89 | 0.001 | 0.010 |
| 2361154 | <b>SYT11</b>    | synaptotagmin XI                                                                                       | 0.89 | 0.001 | 0.010 |
| 2526980 | <b>XRCC5</b>    | X-ray repair complementing defective repair in Chinese hamster cells 5 (double-strand-break rejoining) | 0.89 | 0.000 | 0.003 |
| 2821194 | <b>CAST</b>     | calpastatin                                                                                            | 0.89 | 0.000 | 0.006 |
| 2518583 | <b>DNAJC10</b>  | DnaJ (Hsp40) homolog, subfamily C, member 10                                                           | 0.89 | 0.000 | 0.006 |
| 2342391 | <b>TYW3</b>     | tRNA-yW synthesizing protein 3 homolog (S. cerevisiae)                                                 | 0.89 | 0.000 | 0.002 |
| 2520429 | <b>MYO1B</b>    | myosin IB                                                                                              | 0.89 | 0.002 | 0.011 |
| 3214668 | <b>IARS</b>     | isoleucyl-tRNA synthetase                                                                              | 0.89 | 0.001 | 0.007 |
| 2548402 | <b>EIF2AK2</b>  | eukaryotic translation initiation factor 2-alpha kinase 2                                              | 0.89 | 0.007 | 0.023 |
| 2648141 | <b>MBNL1</b>    | muscleblind-like (Drosophila)                                                                          | 0.88 | 0.000 | 0.005 |
| 2915133 | <b>TPBG</b>     | trophoblast glycoprotein                                                                               | 0.88 | 0.000 | 0.001 |
| 2664452 | <b>ANKRD28</b>  | ankyrin repeat domain 28                                                                               | 0.88 | 0.001 | 0.008 |
| 3408733 | <b>RASSF8</b>   | Ras association (RalGDS/AF-6) domain family (N-terminal) member 8                                      | 0.88 | 0.000 | 0.003 |
| 3620590 | <b>ZFP106</b>   | zinc finger protein 106 homolog (mouse)                                                                | 0.88 | 0.000 | 0.006 |
| 2536298 | <b>SEPT2</b>    | septin 2                                                                                               | 0.88 | 0.000 | 0.005 |
| 3407824 | <b>GOLT1B</b>   | golgi transport 1B                                                                                     | 0.88 | 0.005 | 0.019 |
| 2994342 | <b>TAX1BP1</b>  | Tax1 (human T-cell leukemia virus type I) binding protein 1                                            | 0.88 | 0.001 | 0.008 |
| 2401275 | <b>HNRNPR</b>   | heterogeneous nuclear ribonucleoprotein R                                                              | 0.88 | 0.000 | 0.006 |
| 3760625 | <b>CDC27</b>    | cell division cycle 27 homolog (S. cerevisiae)                                                         | 0.88 | 0.001 | 0.007 |
| 3689922 | <b>VPS35</b>    | vacuolar protein sorting 35 homolog (S. cerevisiae)                                                    | 0.88 | 0.000 | 0.006 |
| 2871821 | <b>TMED7</b>    | transmembrane emp24 protein transport domain containing 7                                              | 0.88 | 0.000 | 0.004 |
| 2390307 | <b>OR2L3</b>    | olfactory receptor, family 2, subfamily L, member 3                                                    | 0.88 | 0.003 | 0.015 |
| 2823551 | <b>MAN2A1</b>   | mannosidase, alpha, class 2A, member 1                                                                 | 0.88 | 0.000 | 0.006 |
| 3446868 | <b>LDHB</b>     | lactate dehydrogenase B                                                                                | 0.88 | 0.000 | 0.005 |
| 3603408 | <b>PSMA4</b>    | proteasome (prosome, macropain) subunit, alpha type, 4                                                 | 0.88 | 0.002 | 0.011 |
| 3327906 | <b>API5</b>     | apoptosis inhibitor 5                                                                                  | 0.87 | 0.001 | 0.008 |
| 2997952 | <b>STARD3NL</b> | STARD3 N-terminal like                                                                                 | 0.87 | 0.000 | 0.004 |
| 3608113 | <b>IQGAP1</b>   | IQ motif containing GTPase activating protein 1                                                        | 0.87 | 0.001 | 0.008 |
| 2435383 | <b>S100A10</b>  | S100 calcium binding protein A10                                                                       | 0.87 | 0.000 | 0.004 |
| 3100166 | <b>RAB2A</b>    | RAB2A, member RAS oncogene family                                                                      | 0.87 | 0.003 | 0.013 |
| 2839671 | <b>RARS</b>     | arganyl-tRNA synthetase                                                                                | 0.87 | 0.000 | 0.003 |
| 3220384 | <b>LPAR1</b>    | lysophosphatidic acid receptor 1                                                                       | 0.87 | 0.001 | 0.007 |
| 2769539 | <b>CHIC2</b>    | cysteine-rich hydrophobic domain 2                                                                     | 0.87 | 0.001 | 0.009 |
| 2870397 | <b>PJA2</b>     | praja ring finger 2                                                                                    | 0.87 | 0.001 | 0.007 |
| 2588319 | <b>KIAA1715</b> | KIAA1715                                                                                               | 0.87 | 0.003 | 0.013 |
| 2883609 | <b>CLINT1</b>   | clathrin interactor 1                                                                                  | 0.87 | 0.000 | 0.004 |
| 2429277 | <b>CSDE1</b>    | cold shock domain containing E1, RNA-binding                                                           | 0.87 | 0.001 | 0.007 |
| 3510450 | <b>LHFP</b>     | lipoma HMGIC fusion partner                                                                            | 0.86 | 0.002 | 0.013 |
| 2700404 | <b>WWTR1</b>    | WW domain containing transcription regulator 1                                                         | 0.86 | 0.000 | 0.002 |
| 2340078 | <b>CACHD1</b>   | cache domain containing 1                                                                              | 0.86 | 0.001 | 0.008 |
| 3666779 | <b>NFAT5</b>    | nuclear factor of activated T-cells 5, tonicity-responsive                                             | 0.86 | 0.000 | 0.005 |
| 2555490 | <b>XPO1</b>     | exportin 1 (CRM1 homolog, yeast)                                                                       | 0.86 | 0.000 | 0.005 |
| 3984779 | <b>HNRNPH2</b>  | heterogeneous nuclear ribonucleoprotein H2 (H')                                                        | 0.86 | 0.001 | 0.008 |

|         |                  |                                                                                   |      |       |       |
|---------|------------------|-----------------------------------------------------------------------------------|------|-------|-------|
| 3909354 | <b>ADNP</b>      | activity-dependent neuroprotector homeobox                                        | 0.86 | 0.000 | 0.004 |
| 2328465 | <b>KHDRBS1</b>   | KH domain containing, RNA binding, signal transduction associated 1               | 0.86 | 0.000 | 0.002 |
| 2462511 | <b>HEATR1</b>    | HEAT repeat containing 1                                                          | 0.86 | 0.000 | 0.003 |
| 3409006 | <b>MED21</b>     | mediator complex subunit 21                                                       | 0.86 | 0.003 | 0.013 |
| 2319340 | <b>SLC25A33</b>  | solute carrier family 25, member 33                                               | 0.86 | 0.002 | 0.010 |
| 2867693 | <b>TTC37</b>     | tetratricopeptide repeat domain 37                                                | 0.86 | 0.000 | 0.006 |
| 3264004 | <b>SHOC2</b>     | soc-2 suppressor of clear homolog (C. elegans)                                    | 0.86 | 0.001 | 0.009 |
| 3072435 | <b>TMEM209</b>   | transmembrane protein 209                                                         | 0.85 | 0.000 | 0.006 |
| 2366028 | <b>DCAF6</b>     | DDB1 and CUL4 associated factor 6                                                 | 0.85 | 0.001 | 0.008 |
| 2913694 | <b>CD109</b>     | CD109 molecule                                                                    | 0.85 | 0.003 | 0.013 |
| 3099750 | <b>SDCBP</b>     | syndecan binding protein (syntenin)                                               | 0.85 | 0.001 | 0.006 |
| 3768412 | <b>SLC16A6</b>   | solute carrier family 16, member 6 (monocarboxylic acid transporter 7)            | 0.85 | 0.012 | 0.032 |
| 3602723 | <b>RCN2</b>      | reticulocalbin 2, EF-hand calcium binding domain                                  | 0.85 | 0.010 | 0.027 |
| 2973694 | <b>ARHGAP18</b>  | Rho GTPase activating protein 18                                                  | 0.85 | 0.000 | 0.001 |
| 2772968 | <b>COX18</b>     | COX18 cytochrome c oxidase assembly homolog (S. cerevisiae)                       | 0.85 | 0.000 | 0.005 |
| 3282213 | <b>YME1L1</b>    | YME1-like 1 (S. cerevisiae)                                                       | 0.85 | 0.000 | 0.005 |
| 3374746 | <b>PATL1</b>     | protein associated with topoisomerase II homolog 1 (yeast)                        | 0.85 | 0.000 | 0.005 |
| 2558511 | <b>TIA1</b>      | TIA1 cytotoxic granule-associated RNA binding protein                             | 0.85 | 0.000 | 0.005 |
| 2556529 | <b>SERTAD2</b>   | SERTA domain containing 2                                                         | 0.85 | 0.001 | 0.008 |
| 3014904 | <b>ZNF655</b>    | zinc finger protein 655                                                           | 0.85 | 0.000 | 0.003 |
| 2779638 | <b>PPP3CA</b>    | protein phosphatase 3, catalytic subunit, alpha isozyme                           | 0.85 | 0.000 | 0.004 |
| 3197318 | <b>AK3</b>       | adenylate kinase 3                                                                | 0.84 | 0.001 | 0.008 |
| 4004819 | <b>DYNLT3</b>    | dynein, light chain, Tctex-type 3                                                 | 0.84 | 0.003 | 0.014 |
| 3189311 | <b>PBX3</b>      | pre-B-cell leukemia homeobox 3                                                    | 0.84 | 0.001 | 0.007 |
| 2377427 | <b>CD46</b>      | CD46 molecule, complement regulatory protein                                      | 0.84 | 0.001 | 0.007 |
| 2501697 | <b>ACTR3</b>     | ARP3 actin-related protein 3 homolog (yeast)                                      | 0.84 | 0.004 | 0.016 |
| 3529082 | <b>PABPN1</b>    | poly(A) binding protein, nuclear 1                                                | 0.84 | 0.000 | 0.004 |
| 2972310 | <b>SERINC1</b>   | serine incorporator 1                                                             | 0.84 | 0.001 | 0.009 |
| 2960955 | <b>SLC17A5</b>   | solute carrier family 17 (anion/sugar transporter), member 5                      | 0.84 | 0.001 | 0.008 |
| 2374345 | <b>CAMSAP1L1</b> | calmodulin regulated spectrin-associated protein 1-like 1                         | 0.84 | 0.000 | 0.005 |
| 3553607 | <b>EIF5</b>      | eukaryotic translation initiation factor 5                                        | 0.84 | 0.000 | 0.006 |
| 3886050 | <b>SRSF6</b>     | serine/arginine-rich splicing factor 6                                            | 0.83 | 0.001 | 0.007 |
| 2766492 | <b>C4ORF34</b>   | chromosome 4 open reading frame 34                                                | 0.83 | 0.003 | 0.015 |
| 3888133 | <b>CSE1L</b>     | CSE1 chromosome segregation 1-like (yeast)                                        | 0.83 | 0.002 | 0.010 |
| 2353881 | <b>MAN1A2</b>    | mannosidase, alpha, class 1A, member 2                                            | 0.83 | 0.000 | 0.004 |
| 3134511 | <b>SNAI2</b>     | snail homolog 2 (Drosophila)                                                      | 0.83 | 0.005 | 0.019 |
| 2730673 | <b>MOBK1A</b>    | MOB1, Mps One Binder kinase activator-like 1A (yeast)                             | 0.83 | 0.001 | 0.009 |
| 3508330 | <b>HSPH1</b>     | heat shock 105kDa/110kDa protein 1                                                | 0.83 | 0.000 | 0.004 |
| 3061438 | <b>SAMD9</b>     | sterile alpha motif domain containing 9                                           | 0.83 | 0.008 | 0.025 |
| 2829416 | <b>SEC24A</b>    | SEC24 family, member A (S. cerevisiae)                                            | 0.83 | 0.000 | 0.003 |
| 3152220 | <b>KIAA0196</b>  | KIAA0196                                                                          | 0.83 | 0.000 | 0.003 |
| 2553282 | <b>PSME4</b>     | proteasome (prosome, macropain) activator subunit 4                               | 0.83 | 0.000 | 0.004 |
| 2879105 | <b>SPRY4</b>     | sprouty homolog 4 (Drosophila)                                                    | 0.83 | 0.000 | 0.005 |
| 2657250 | <b>LPP</b>       | LIM domain containing preferred translocation partner in lipoma                   | 0.83 | 0.000 | 0.006 |
| 3306516 | <b>SMNDC1</b>    | survival motor neuron domain containing 1                                         | 0.83 | 0.000 | 0.004 |
| 2809399 | <b>FST</b>       | follicle-stimulating hormone receptor                                             | 0.83 | 0.011 | 0.030 |
| 2831209 | <b>PAIP2</b>     | poly(A) binding protein interacting protein 2                                     | 0.83 | 0.000 | 0.005 |
| 2615600 | <b>STT3B</b>     | STT3, subunit of the oligosaccharyltransferase complex, homolog B (S. cerevisiae) | 0.83 | 0.001 | 0.009 |
| 2766893 | <b>APBB2</b>     | amyloid beta (A4) precursor protein-binding, family B, member 2                   | 0.82 | 0.000 | 0.006 |
| 3039177 | <b>ETV1</b>      | ets variant 1                                                                     | 0.82 | 0.002 | 0.012 |
| 2922215 | <b>MARCKS</b>    | myristoylated alanine-rich protein kinase C substrate                             | 0.82 | 0.003 | 0.016 |
| 2636185 | <b>SLC35A5</b>   | solute carrier family 35, member A5                                               | 0.82 | 0.001 | 0.007 |
| 2875929 | <b>C5ORF15</b>   | chromosome 5 open reading frame 15                                                | 0.82 | 0.000 | 0.004 |
| 2683763 | <b>ROBO1</b>     | roundabout, axon guidance receptor, homolog 1 (Drosophila)                        | 0.82 | 0.002 | 0.011 |
| 4054117 | <b>TAF13</b>     | TAF13 RNA polymerase II, TATA box binding protein (TBP)-associated factor, 18kDa  | 0.82 | 0.023 | 0.046 |
| 3625674 | <b>RFX7</b>      | regulatory factor X, 7                                                            | 0.82 | 0.000 | 0.003 |
| 7385547 | <b>CCL2</b>      | chemokine (C-C motif) ligand 2                                                    | 0.82 | 0.022 | 0.044 |
| 3136782 | <b>NSMAF</b>     | neutral sphingomyelinase (N-SMase) activation associated factor                   | 0.82 | 0.000 | 0.005 |
| 2515240 | <b>CYBRD1</b>    | cytochrome b reductase 1                                                          | 0.82 | 0.003 | 0.015 |
| 2407439 | <b>SF3A3</b>     | splicing factor 3a, subunit 3, 60kDa                                              | 0.82 | 0.002 | 0.011 |
| 3281621 | <b>ARHGAP21</b>  | Rho GTPase activating protein 21                                                  | 0.82 | 0.002 | 0.010 |
| 2408855 | <b>FOXJ3</b>     | forkhead box J3                                                                   | 0.82 | 0.000 | 0.004 |
| 3448975 | <b>ERGIC2</b>    | ERGIC and golgi 2                                                                 | 0.82 | 0.001 | 0.008 |
| 3346584 | <b>BIRC2</b>     | baculoviral IAP repeat-containing 2                                               | 0.82 | 0.001 | 0.010 |
| 2943808 | <b>NUP153</b>    | nucleoporin 153kDa                                                                | 0.82 | 0.001 | 0.008 |
| 3560617 | <b>SNX6</b>      | sorting nexin 6                                                                   | 0.82 | 0.014 | 0.034 |
| 2726323 | <b>SLAIN2</b>    | SLAIN motif family, member 2                                                      | 0.82 | 0.000 | 0.005 |

|         |                 |                                                                                                   |      |       |       |
|---------|-----------------|---------------------------------------------------------------------------------------------------|------|-------|-------|
| 3659858 | <b>TMEM188</b>  | transmembrane protein 188                                                                         | 0.82 | 0.002 | 0.013 |
| 3542689 | <b>PCNX</b>     | pecanex homolog (Drosophila)                                                                      | 0.82 | 0.001 | 0.009 |
| 3560673 | <b>CFL2</b>     | cofilin 2 (muscle)                                                                                | 0.81 | 0.004 | 0.016 |
| 3110317 | <b>CTHRC1</b>   | collagen triple helix repeat containing 1                                                         | 0.81 | 0.010 | 0.027 |
| 3351315 | <b>UBE4A</b>    | ubiquitination factor E4A (UFD2 homolog, yeast)                                                   | 0.81 | 0.000 | 0.005 |
| 2942504 | <b>RANBP9</b>   | RAN binding protein 9                                                                             | 0.81 | 0.001 | 0.008 |
| 3961664 | <b>ST13</b>     | suppression of tumorigenicity 13 (colon carcinoma) (Hsp70 interacting protein)                    | 0.81 | 0.000 | 0.003 |
| 3237088 | <b>STAM</b>     | signal transducing adaptor molecule (SH3 domain and ITAM motif) 1                                 | 0.81 | 0.000 | 0.005 |
| 3595096 | <b>TCF12</b>    | transcription factor 12                                                                           | 0.81 | 0.001 | 0.009 |
| 3043936 | <b>FKBP14</b>   | FK506 binding protein 14, 22 kDa                                                                  | 0.81 | 0.000 | 0.005 |
| 2412529 | <b>NRD1</b>     | nardilysin (N-arginine dibasic convertase)                                                        | 0.81 | 0.000 | 0.004 |
| 2642791 | <b>DNAJC13</b>  | DnaJ (Hsp40) homolog, subfamily C, member 13                                                      | 0.81 | 0.001 | 0.008 |
| 2628682 | <b>ARL6IP5</b>  | ADP-ribosylation-like factor 6 interacting protein 5                                              | 0.81 | 0.001 | 0.007 |
| 3468103 | <b>GNPTAB</b>   | N-acetylglucosamine-1-phosphate transferase, alpha and beta subunits                              | 0.81 | 0.001 | 0.008 |
| 3923426 | <b>AGPAT3</b>   | 1-acylglycerol-3-phosphate O-acyltransferase 3                                                    | 0.81 | 0.001 | 0.007 |
| 4018729 | <b>IL13RA2</b>  | interleukin 13 receptor, alpha 2                                                                  | 0.81 | 0.024 | 0.047 |
| 3809324 | <b>TXNL1</b>    | thioredoxin-like 1                                                                                | 0.81 | 0.000 | 0.003 |
| 3511031 | <b>ELF1</b>     | E74-like factor 1 (ets domain transcription factor)                                               | 0.81 | 0.000 | 0.004 |
| 2601995 | <b>IRS1</b>     | insulin receptor substrate 1                                                                      | 0.81 | 0.000 | 0.001 |
| 2968054 | <b>SEC63</b>    | SEC63 homolog (S. cerevisiae)                                                                     | 0.81 | 0.001 | 0.010 |
| 3061805 | <b>SGCE</b>     | sarcoglycan, epsilon                                                                              | 0.81 | 0.001 | 0.009 |
| 3999395 | <b>MID1</b>     | midline 1 (Opitz/BBB syndrome)                                                                    | 0.80 | 0.001 | 0.007 |
| 3020343 | <b>MET</b>      | met proto-oncogene (hepatocyte growth factor receptor)                                            | 0.80 | 0.006 | 0.020 |
| 3114358 | <b>FAM91A1</b>  | family with sequence similarity 91, member A1                                                     | 0.80 | 0.000 | 0.006 |
| 2370991 | <b>DHX9</b>     | DEAH (Asp-Glu-Ala-His) box polypeptide 9                                                          | 0.80 | 0.000 | 0.005 |
| 3795733 | <b>COLEC12</b>  | collectin sub-family member 12                                                                    | 0.80 | 0.018 | 0.040 |
| 2512701 | <b>PSMD14</b>   | proteasome (prosome, macropain) 26S subunit, non-ATPase, 14                                       | 0.80 | 0.000 | 0.004 |
| 3422269 | <b>RAB21</b>    | RAB21, member RAS oncogene family                                                                 | 0.80 | 0.005 | 0.019 |
| 2773907 | <b>SDAD1</b>    | SDA1 domain containing 1                                                                          | 0.80 | 0.000 | 0.006 |
| 2666904 | <b>SLC4A7</b>   | solute carrier family 4, sodium bicarbonate cotransporter, member 7                               | 0.80 | 0.000 | 0.006 |
| 2701927 | <b>SLC33A1</b>  | solute carrier family 33 (acetyl-CoA transporter), member 1                                       | 0.80 | 0.000 | 0.004 |
| 3498502 | <b>TM9SF2</b>   | transmembrane 9 superfamily member 2                                                              | 0.80 | 0.005 | 0.018 |
| 3041294 | <b>FAM126A</b>  | family with sequence similarity 126, member A                                                     | 0.80 | 0.002 | 0.012 |
| 2966636 | <b>ASCC3</b>    | activating signal cointegrator 1 complex subunit 3                                                | 0.80 | 0.001 | 0.007 |
| 2746024 | <b>ABCE1</b>    | ATP-binding cassette, sub-family E (OABP), member 1                                               | 0.80 | 0.000 | 0.006 |
| 3810472 | <b>LMAN1</b>    | lectin, mannose-binding, 1                                                                        | 0.80 | 0.002 | 0.011 |
| 3013255 | <b>PEG10</b>    | paternally expressed 10                                                                           | 0.80 | 0.001 | 0.010 |
| 2705748 | <b>NCEH1</b>    | neutral cholesterol ester hydrolase 1                                                             | 0.80 | 0.000 | 0.006 |
| 3263555 | <b>ADD3</b>     | adducin 3 (gamma)                                                                                 | 0.80 | 0.001 | 0.008 |
| 3248999 | <b>REEP3</b>    | receptor accessory protein 3                                                                      | 0.80 | 0.004 | 0.017 |
| 2591421 | <b>TFPI</b>     | tissue factor pathway inhibitor (lipoprotein-associated coagulation inhibitor)                    | 0.80 | 0.001 | 0.010 |
| 3060051 | <b>C7ORF23</b>  | chromosome 7 open reading frame 23                                                                | 0.80 | 0.001 | 0.008 |
| 3728964 | <b>PRR11</b>    | proline rich 11                                                                                   | 0.80 | 0.008 | 0.025 |
| 3541137 | <b>EIF2S1</b>   | eukaryotic translation initiation factor 2, subunit 1 alpha, 35kDa                                | 0.80 | 0.003 | 0.015 |
| 3421300 | <b>MDM2</b>     | Mdm2 p53 binding protein homolog (mouse)                                                          | 0.80 | 0.000 | 0.006 |
| 2990342 | <b>TMEM106B</b> | transmembrane protein 106B                                                                        | 0.79 | 0.000 | 0.004 |
| 2636589 | <b>ATP6V1A</b>  | ATPase, H+ transporting, lysosomal 70kDa, V1 subunit A                                            | 0.79 | 0.000 | 0.002 |
| 2341565 | <b>SRSF11</b>   | serine/arginine-rich splicing factor 11                                                           | 0.79 | 0.001 | 0.008 |
| 2651782 | <b>SEC62</b>    | SEC62 homolog (S. cerevisiae)                                                                     | 0.79 | 0.000 | 0.006 |
| 3765689 | <b>MED13</b>    | mediator complex subunit 13                                                                       | 0.79 | 0.001 | 0.008 |
| 3405587 | <b>GPRC5A</b>   | G protein-coupled receptor, family C, group 5, member A                                           | 0.79 | 0.013 | 0.033 |
| 3913712 | <b>YTHDF1</b>   | YTH domain family, member 1                                                                       | 0.79 | 0.000 | 0.003 |
| 3801943 | <b>ZNF521</b>   | zinc finger protein 521                                                                           | 0.79 | 0.001 | 0.008 |
| 3429857 | <b>C12ORF75</b> | chromosome 12 open reading frame 75                                                               | 0.79 | 0.005 | 0.019 |
| 3590388 | <b>NUSAP1</b>   | nucleolar and spindle associated protein 1                                                        | 0.79 | 0.016 | 0.036 |
| 3563922 | <b>MAP4K5</b>   | mitogen-activated protein kinase kinase kinase 5                                                  | 0.79 | 0.001 | 0.010 |
| 3017547 | <b>MLL5</b>     | myeloid/lymphoid or mixed-lineage leukemia 5 (trithorax homolog, Drosophila)                      | 0.79 | 0.000 | 0.005 |
| 3114832 | <b>SQLE</b>     | squalene epoxidase                                                                                | 0.79 | 0.001 | 0.010 |
| 4021149 | <b>SMARCA1</b>  | SWI/SNF related, matrix associated, actin dependent regulator of chromatin, subfamily a, member 1 | 0.79 | 0.001 | 0.007 |
| 3033209 | <b>INSIG1</b>   | insulin induced gene 1                                                                            | 0.79 | 0.001 | 0.007 |
| 2614142 | <b>NR1D2</b>    | nuclear receptor subfamily 1, group D, member 2                                                   | 0.79 | 0.002 | 0.013 |
| 2366156 | <b>SFT2D2</b>   | SFT2 domain containing 2                                                                          | 0.79 | 0.001 | 0.010 |
| 3597476 | <b>RAB8B</b>    | RAB8B, member RAS oncogene family                                                                 | 0.78 | 0.000 | 0.003 |
| 2682436 | <b>RYBP</b>     | RING1 and YY1 binding protein                                                                     | 0.78 | 0.000 | 0.006 |
| 2496727 | <b>MAP4K4</b>   | mitogen-activated protein kinase kinase kinase 4                                                  | 0.78 | 0.000 | 0.003 |
| 2414998 | <b>MYSM1</b>    | Myb-like, SWIRM and MPN domains 1                                                                 | 0.78 | 0.004 | 0.016 |

|         |                  |                                                                                  |      |       |       |
|---------|------------------|----------------------------------------------------------------------------------|------|-------|-------|
| 2601021 | <b>FARSB</b>     | phenylalanyl-tRNA synthetase, beta subunit                                       | 0.78 | 0.000 | 0.006 |
| 2551786 | <b>MCFD2</b>     | multiple coagulation factor deficiency 2                                         | 0.78 | 0.000 | 0.005 |
| 3061456 | <b>SAMD9L</b>    | sterile alpha motif domain containing 9-like                                     | 0.78 | 0.005 | 0.019 |
| 2366132 | <b>TIPRL</b>     | TIP41, TOR signaling pathway regulator-like (S. cerevisiae)                      | 0.78 | 0.001 | 0.007 |
| 3421630 | <b>CCT2</b>      | chaperonin containing TCP1, subunit 2 (beta)                                     | 0.78 | 0.001 | 0.007 |
| 3058156 | <b>TMEM60</b>    | transmembrane protein 60                                                         | 0.78 | 0.002 | 0.012 |
| 2970532 | <b>HDAC2</b>     | histone deacetylase 2                                                            | 0.78 | 0.000 | 0.005 |
| 3041550 | <b>TRA2A</b>     | transformer 2 alpha homolog (Drosophila)                                         | 0.78 | 0.004 | 0.016 |
| 3503119 | <b>ZNF828</b>    | zinc finger protein 828                                                          | 0.78 | 0.000 | 0.005 |
| 3731826 | <b>PRKCA</b>     | protein kinase C, alpha                                                          | 0.78 | 0.001 | 0.009 |
| 3362719 | <b>EIF4G2</b>    | eukaryotic translation initiation factor 4 gamma, 2                              | 0.78 | 0.001 | 0.008 |
| 3632492 | <b>NPTN</b>      | neuroplastin                                                                     | 0.78 | 0.003 | 0.015 |
| 3273484 | <b>LARP4B</b>    | La ribonucleoprotein domain family, member 4B                                    | 0.78 | 0.003 | 0.014 |
| 3419641 | <b>SRGAP1</b>    | SLIT-ROBO Rho GTPase activating protein 1                                        | 0.78 | 0.000 | 0.005 |
| 2364231 | <b>DDR2</b>      | discoidin domain receptor tyrosine kinase 2                                      | 0.78 | 0.001 | 0.008 |
| 2827388 | <b>PRRC1</b>     | proline-rich coiled-coil 1                                                       | 0.77 | 0.000 | 0.006 |
| 2614120 | <b>RPL15</b>     | ribosomal protein L15                                                            | 0.77 | 0.008 | 0.024 |
| 3809671 | <b>NARS</b>      | asparaginyl-tRNA synthetase                                                      | 0.77 | 0.003 | 0.014 |
| 2581430 | <b>STAM2</b>     | signal transducing adaptor molecule (SH3 domain and ITAM motif) 2                | 0.77 | 0.000 | 0.006 |
| 2336497 | <b>ZYG11B</b>    | zyg-11 homolog B (C. elegans)                                                    | 0.77 | 0.001 | 0.008 |
| 2555277 | <b>USP34</b>     | ubiquitin specific peptidase 34                                                  | 0.77 | 0.001 | 0.007 |
| 2703217 | <b>KPNA4</b>     | karyopherin alpha 4 (importin alpha 3)                                           | 0.77 | 0.001 | 0.007 |
| 3894228 | <b>CSNK2A1</b>   | casein kinase 2, alpha 1 polypeptide                                             | 0.77 | 0.001 | 0.008 |
| 3075566 | <b>ZC3HAV1</b>   | zinc finger CCCH-type, antiviral 1                                               | 0.77 | 0.000 | 0.006 |
| 3717052 | <b>NF1</b>       | neurofibromin 1                                                                  | 0.77 | 0.000 | 0.006 |
| 3045739 | <b>HERPUD2</b>   | HERPUD family member 2                                                           | 0.77 | 0.000 | 0.006 |
| 2728448 | <b>POLR2B</b>    | polymerase (RNA) II (DNA directed) polypeptide B, 140kDa                         | 0.77 | 0.000 | 0.005 |
| 3247757 | <b>UBE2D1</b>    | ubiquitin-conjugating enzyme E2D 1 (UBC4/5 homolog, yeast)                       | 0.77 | 0.001 | 0.007 |
| 2515369 | <b>HAT1</b>      | histone acetyltransferase 1                                                      | 0.77 | 0.001 | 0.008 |
| 3451375 | <b>PRICKLE1</b>  | prickle homolog 1 (Drosophila)                                                   | 0.77 | 0.017 | 0.038 |
| 2458289 | <b>LBR</b>       | lamin B receptor                                                                 | 0.77 | 0.001 | 0.008 |
| 2881554 | <b>DCTN4</b>     | dynactin 4 (p62)                                                                 | 0.77 | 0.000 | 0.004 |
| 2691014 | <b>GSK3B</b>     | glycogen synthase kinase 3 beta                                                  | 0.77 | 0.001 | 0.007 |
| 3422231 | <b>TMEM19</b>    | transmembrane protein 19                                                         | 0.77 | 0.002 | 0.012 |
| 2382360 | <b>DEGS1</b>     | degenerative spermatocyte homolog 1, lipid desaturase (Drosophila)               | 0.77 | 0.002 | 0.011 |
| 3804195 | <b>SLC39A6</b>   | solute carrier family 39 (zinc transporter), member 6                            | 0.77 | 0.001 | 0.010 |
| 2711034 | <b>C3ORF59</b>   | chromosome 3 open reading frame 59                                               | 0.77 | 0.002 | 0.013 |
| 2689208 | <b>NAA50</b>     | N(alpha)-acetyltransferase 50, NatE catalytic subunit                            | 0.76 | 0.001 | 0.008 |
| 2726483 | <b>OCIAD1</b>    | OCIA domain containing 1                                                         | 0.76 | 0.000 | 0.005 |
| 2877171 | <b>FAM13B</b>    | family with sequence similarity 13, member B                                     | 0.76 | 0.000 | 0.006 |
| 3097152 | <b>MCM4</b>      | minichromosome maintenance complex component 4                                   | 0.76 | 0.002 | 0.011 |
| 2732942 | <b>BMP2K</b>     | BMP2 inducible kinase                                                            | 0.76 | 0.001 | 0.007 |
| 3724782 | <b>KPNB1</b>     | karyopherin (importin) beta 1                                                    | 0.76 | 0.001 | 0.006 |
| 3136413 | <b>IMPAD1</b>    | inositol monophosphatase domain containing 1                                     | 0.76 | 0.001 | 0.010 |
| 3146012 | <b>NIPAL2</b>    | NIPA-like domain containing 2                                                    | 0.76 | 0.002 | 0.012 |
| 2335986 | <b>RNF11</b>     | ring finger protein 11                                                           | 0.76 | 0.004 | 0.017 |
| 2482230 | <b>ERLEC1</b>    | endoplasmic reticulum lectin 1                                                   | 0.76 | 0.001 | 0.009 |
| 2800906 | <b>MTRR</b>      | 5-methyltetrahydrofolate-homocysteine methyltransferase reductase                | 0.76 | 0.000 | 0.003 |
| 3042610 | <b>SKAP2</b>     | src kinase associated phosphoprotein 2                                           | 0.76 | 0.000 | 0.003 |
| 2325251 | <b>TCEB3</b>     | transcription elongation factor B (SIII), polypeptide 3 (110kDa, elongin A)      | 0.76 | 0.000 | 0.003 |
| 3137530 | <b>ASPH</b>      | aspartate beta-hydroxylase                                                       | 0.76 | 0.001 | 0.009 |
| 2648873 | <b>GMPS</b>      | guanine monophosphate synthetase                                                 | 0.76 | 0.002 | 0.011 |
| 2807359 | <b>OSMR</b>      | oncostatin M receptor                                                            | 0.76 | 0.003 | 0.015 |
| 3406589 | <b>MGST1</b>     | microsomal glutathione S-transferase 1                                           | 0.75 | 0.006 | 0.021 |
| 3150663 | <b>TAF2</b>      | TAF2 RNA polymerase II, TATA box binding protein (TBP)-associated factor, 150kDa | 0.75 | 0.000 | 0.006 |
| 2523213 | <b>BMPR2</b>     | bone morphogenetic protein receptor, type II (serine/threonine kinase)           | 0.75 | 0.003 | 0.014 |
| 2507495 | <b>UBXN4</b>     | UBX domain protein 4                                                             | 0.75 | 0.000 | 0.006 |
| 2782545 | <b>CAMK2D</b>    | calcium/calmodulin-dependent protein kinase II delta                             | 0.75 | 0.002 | 0.011 |
| 2523045 | <b>FZD7</b>      | frizzled homolog 7 (Drosophila)                                                  | 0.75 | 0.000 | 0.005 |
| 3303255 | <b>ERLIN1</b>    | ER lipid raft associated 1                                                       | 0.75 | 0.015 | 0.035 |
| 2668021 | <b>CMTM6</b>     | CKLF-like MARVEL transmembrane domain containing 6                               | 0.75 | 0.000 | 0.005 |
| 3536663 | <b>MAPK1IP1L</b> | mitogen-activated protein kinase 1 interacting protein 1-like                    | 0.75 | 0.001 | 0.009 |
| 2400322 | <b>HP1BP3</b>    | heterochromatin protein 1, binding protein 3                                     | 0.75 | 0.000 | 0.006 |
| 3959203 | <b>RBFOX2</b>    | RNA binding protein, fox-1 homolog (C. elegans) 2                                | 0.75 | 0.000 | 0.006 |
| 3693673 | <b>CNOT1</b>     | CCR4-NOT transcription complex, subunit 1                                        | 0.75 | 0.000 | 0.006 |
| 3005956 | <b>C7ORF42</b>   | chromosome 7 open reading frame 42                                               | 0.75 | 0.000 | 0.004 |
| 3918959 | <b>MRPS6</b>     | mitochondrial ribosomal protein S6                                               | 0.75 | 0.000 | 0.005 |
| 3212294 | <b>HNRNPK</b>    | heterogeneous nuclear ribonucleoprotein K                                        | 0.75 | 0.000 | 0.005 |

|         |                  |                                                                                            |      |       |       |
|---------|------------------|--------------------------------------------------------------------------------------------|------|-------|-------|
| 3732885 | <b>PRKAR1A</b>   | protein kinase, cAMP-dependent, regulatory, type I, alpha (tissue specific extinguisher 1) | 0.75 | 0.001 | 0.009 |
| 3666732 | <b>CYB5B</b>     | cytochrome b5 type B (outer mitochondrial membrane)                                        | 0.75 | 0.002 | 0.011 |
| 2902574 | <b>LY6G5B</b>    | lymphocyte antigen 6 complex, locus G5B                                                    | 0.75 | 0.000 | 0.005 |
| 4011096 | <b>EDA2R</b>     | ectodysplasin A2 receptor                                                                  | 0.75 | 0.001 | 0.007 |
| 2806091 | <b>RAI14</b>     | retinoic acid induced 14                                                                   | 0.75 | 0.001 | 0.008 |
| 3719702 | <b>MRPL45</b>    | mitochondrial ribosomal protein L45                                                        | 0.75 | 0.000 | 0.005 |
| 2669157 | <b>EPM2AIP1</b>  | EPM2A (laforin) interacting protein 1                                                      | 0.74 | 0.001 | 0.009 |
| 2822407 | <b>PP1P5K2</b>   | diphosphoinositol pentakisphosphate kinase 2                                               | 0.74 | 0.000 | 0.004 |
| 3662612 | <b>RSPRY1</b>    | ring finger and SPRY domain containing 1                                                   | 0.74 | 0.000 | 0.005 |
| 2510884 | <b>ARL6IP6</b>   | ADP-ribosylation-like factor 6 interacting protein 6                                       | 0.74 | 0.008 | 0.025 |
| 2558045 | <b>GFPT1</b>     | glutamine--fructose-6-phosphate transaminase 1                                             | 0.74 | 0.003 | 0.015 |
| 3136178 | <b>PLAG1</b>     | pleiomorphic adenoma gene 1                                                                | 0.74 | 0.005 | 0.019 |
| 2329341 | <b>ZSCAN20</b>   | zinc finger and SCAN domain containing 20                                                  | 0.74 | 0.002 | 0.010 |
| 3887635 | <b>NCOA3</b>     | nuclear receptor coactivator 3                                                             | 0.74 | 0.003 | 0.014 |
| 2616317 | <b>PDCD6IP</b>   | programmed cell death 6 interacting protein                                                | 0.74 | 0.000 | 0.006 |
| 3768015 | <b>HELZ</b>      | helicase with zinc finger                                                                  | 0.74 | 0.001 | 0.009 |
| 2722151 | <b>RBPJ</b>      | recombination signal binding protein for immunoglobulin kappa J region                     | 0.74 | 0.001 | 0.009 |
| 3874751 | <b>PRNP</b>      | prion protein                                                                              | 0.74 | 0.002 | 0.011 |
| 2456849 | <b>RAB3GAP2</b>  | RAB3 GTPase activating protein subunit 2 (non-catalytic)                                   | 0.74 | 0.000 | 0.004 |
| 3960629 | <b>DDX17</b>     | DEAD (Asp-Glu-Ala-Asp) box polypeptide 17                                                  | 0.74 | 0.002 | 0.010 |
| 3680610 | <b>GSPT1</b>     | G1 to S phase transition 1                                                                 | 0.74 | 0.000 | 0.003 |
| 3328069 | <b>HSD17B12</b>  | hydroxysteroid (17-beta) dehydrogenase 12                                                  | 0.74 | 0.002 | 0.010 |
| 2969677 | <b>REV3L</b>     | REV3-like, catalytic subunit of DNA polymerase zeta (yeast)                                | 0.74 | 0.002 | 0.011 |
| 3228007 | <b>SETX</b>      | senataxin                                                                                  | 0.74 | 0.002 | 0.010 |
| 2601544 | <b>CUL3</b>      | cullin 3                                                                                   | 0.74 | 0.000 | 0.005 |
| 3948898 | <b>LOC150381</b> | hypothetical LOC150381                                                                     | 0.74 | 0.000 | 0.002 |
| 3788302 | <b>SMAD4</b>     | SMAD family member 4                                                                       | 0.74 | 0.001 | 0.009 |
| 2830638 | <b>KIF20A</b>    | kinesin family member 20A                                                                  | 0.74 | 0.020 | 0.042 |
| 2457988 | <b>ZNF706</b>    | zinc finger protein 706                                                                    | 0.74 | 0.001 | 0.009 |
| 3454331 | <b>LIMA1</b>     | LIM domain and actin binding 1                                                             | 0.74 | 0.010 | 0.028 |
| 3490655 | <b>CKAP2</b>     | cytoskeleton associated protein 2                                                          | 0.73 | 0.016 | 0.037 |
| 2477203 | <b>VIT</b>       | vitrin                                                                                     | 0.73 | 0.023 | 0.046 |
| 2550790 | <b>LRPPRC</b>    | leucine-rich PPR-motif containing                                                          | 0.73 | 0.000 | 0.005 |
| 3275132 | <b>GDI2</b>      | GDP dissociation inhibitor 2                                                               | 0.73 | 0.001 | 0.007 |
| 2457261 | <b>DUSP10</b>    | dual specificity phosphatase 10                                                            | 0.73 | 0.012 | 0.032 |
| 3060245 | <b>SLC25A40</b>  | solute carrier family 25, member 40                                                        | 0.73 | 0.007 | 0.023 |
| 3581221 | <b>AHNAK2</b>    | AHNAK nucleoprotein 2                                                                      | 0.73 | 0.011 | 0.029 |
| 3376155 | <b>NXF1</b>      | nuclear RNA export factor 1                                                                | 0.73 | 0.000 | 0.002 |
| 3183111 | <b>SLC44A1</b>   | solute carrier family 44, member 1                                                         | 0.73 | 0.003 | 0.015 |
| 2544179 | <b>SF3B14</b>    | splicing factor 3B, 14 kDa subunit                                                         | 0.73 | 0.001 | 0.007 |
| 2725332 | <b>TMEM33</b>    | transmembrane protein 33                                                                   | 0.73 | 0.000 | 0.003 |
| 3435853 | <b>TMED2</b>     | transmembrane emp24 domain trafficking protein 2                                           | 0.73 | 0.004 | 0.016 |
| 3682135 | <b>C16ORF63</b>  | chromosome 16 open reading frame 63                                                        | 0.73 | 0.002 | 0.012 |
| 3100909 | <b>YTHDF3</b>    | YTH domain family, member 3                                                                | 0.73 | 0.000 | 0.006 |
| 3724698 | <b>NPEPPS</b>    | aminopeptidase puromycin sensitive                                                         | 0.73 | 0.001 | 0.008 |
| 3742756 | <b>DERL2</b>     | Der1-like domain family, member 2                                                          | 0.73 | 0.001 | 0.009 |
| 3390180 | <b>KDEL2</b>     | KDEL (Lys-Asp-Glu-Leu) containing 2                                                        | 0.73 | 0.003 | 0.014 |
| 2840002 | <b>CCDC99</b>    | coiled-coil domain containing 99                                                           | 0.72 | 0.016 | 0.036 |
| 3256279 | <b>FAM35A</b>    | family with sequence similarity 35, member A                                               | 0.72 | 0.000 | 0.003 |
| 2829542 | <b>C5ORF24</b>   | chromosome 5 open reading frame 24                                                         | 0.72 | 0.003 | 0.015 |
| 2825907 | <b>PRR16</b>     | proline rich 16                                                                            | 0.72 | 0.001 | 0.007 |
| 3653317 | <b>RBBP6</b>     | retinoblastoma binding protein 6                                                           | 0.72 | 0.000 | 0.005 |
| 2369557 | <b>SOAT1</b>     | sterol O-acyltransferase 1                                                                 | 0.72 | 0.001 | 0.008 |
| 3205506 | <b>FBXO10</b>    | F-box protein 10                                                                           | 0.72 | 0.001 | 0.007 |
| 2646327 | <b>C3ORF58</b>   | chromosome 3 open reading frame 58                                                         | 0.72 | 0.000 | 0.003 |
| 2531522 | <b>CAB39</b>     | calcium binding protein 39                                                                 | 0.72 | 0.000 | 0.005 |
| 3539070 | <b>HIF1A</b>     | hypoxia inducible factor 1, alpha subunit (basic helix-loop-helix transcription factor)    | 0.72 | 0.019 | 0.040 |
| 3339167 | <b>FAM86C</b>    | family with sequence similarity 86, member C                                               | 0.72 | 0.002 | 0.012 |
| 3466826 | <b>CDK17</b>     | cyclin-dependent kinase 17                                                                 | 0.72 | 0.000 | 0.003 |
| 2685304 | <b>PROS1</b>     | protein S (alpha)                                                                          | 0.72 | 0.002 | 0.011 |
| 2814756 | <b>MAP1B</b>     | microtubule-associated protein 1B                                                          | 0.72 | 0.002 | 0.013 |
| 3672830 | <b>MAP1LC3B</b>  | microtubule-associated protein 1 light chain 3 beta                                        | 0.72 | 0.002 | 0.011 |
| 2584134 | <b>FAP</b>       | fibroblast activation protein, alpha                                                       | 0.72 | 0.004 | 0.016 |
| 3290785 | <b>CCDC6</b>     | coiled-coil domain containing 6                                                            | 0.72 | 0.001 | 0.009 |
| 3145149 | <b>TP53INP1</b>  | tumor protein p53 inducible nuclear protein 1                                              | 0.72 | 0.009 | 0.026 |
| 3017123 | <b>PMPCB</b>     | peptidase (mitochondrial processing) beta                                                  | 0.72 | 0.000 | 0.005 |
| 4023274 | <b>MMGT1</b>     | membrane magnesium transporter 1                                                           | 0.72 | 0.001 | 0.008 |
| 2442134 | <b>TMCO1</b>     | transmembrane and coiled-coil domains 1                                                    | 0.72 | 0.001 | 0.010 |

|         |                |                                                                                              |      |       |       |
|---------|----------------|----------------------------------------------------------------------------------------------|------|-------|-------|
| 2890148 | <b>HNRNPH1</b> | heterogeneous nuclear ribonucleoprotein H1 (H)                                               | 0.72 | 0.002 | 0.012 |
| 3395464 | <b>ASAM</b>    | adipocyte-specific adhesion molecule                                                         | 0.72 | 0.002 | 0.011 |
| 2719361 | <b>CPEB2</b>   | cytoplasmic polyadenylation element binding protein 2                                        | 0.71 | 0.000 | 0.002 |
| 2979679 | <b>ZBTB2</b>   | zinc finger and BTB domain containing 2                                                      | 0.71 | 0.000 | 0.003 |
| 3497790 | <b>IPO5</b>    | importin 5                                                                                   | 0.71 | 0.007 | 0.023 |
| 3537747 | <b>PSMA3</b>   | proteasome (prosome, macropain) subunit, alpha type, 3                                       | 0.71 | 0.005 | 0.020 |
| 2935475 | <b>QKI</b>     | quaking homolog, KH domain RNA binding (mouse)                                               | 0.71 | 0.005 | 0.018 |
| 2984573 | <b>SFT2D1</b>  | SFT2 domain containing 1                                                                     | 0.71 | 0.003 | 0.015 |
| 3971329 | <b>MBTPS2</b>  | membrane-bound transcription factor peptidase, site 2                                        | 0.71 | 0.000 | 0.006 |
| 2890413 | <b>RNF130</b>  | ring finger protein 130                                                                      | 0.71 | 0.003 | 0.014 |
| 3249788 | <b>CCAR1</b>   | cell division cycle and apoptosis regulator 1                                                | 0.71 | 0.000 | 0.004 |
| 2632051 | <b>C3ORF38</b> | chromosome 3 open reading frame 38                                                           | 0.71 | 0.001 | 0.007 |
| 2766588 | <b>PDS5A</b>   | PDS5, regulator of cohesion maintenance, homolog A ( <i>S. cerevisiae</i> )                  | 0.71 | 0.001 | 0.007 |
| 3991698 | <b>HPRT1</b>   | hypoxanthine phosphoribosyltransferase 1                                                     | 0.71 | 0.005 | 0.018 |
| 3561952 | <b>SEC23A</b>  | Sec23 homolog A ( <i>S. cerevisiae</i> )                                                     | 0.71 | 0.006 | 0.021 |
| 3402978 | <b>DSTNP2</b>  | destrin (actin depolymerizing factor) pseudogene 2                                           | 0.71 | 0.007 | 0.022 |
| 3653398 | <b>TNRC6A</b>  | trinucleotide repeat containing 6A                                                           | 0.71 | 0.000 | 0.005 |
| 3387537 | <b>MAML2</b>   | mastermind-like 2 ( <i>Drosophila</i> )                                                      | 0.71 | 0.002 | 0.012 |
| 2504883 | <b>UGGT1</b>   | UDP-glucose glycoprotein glucosyltransferase 1                                               | 0.71 | 0.001 | 0.010 |
| 2556667 | <b>RAB1A</b>   | RAB1A, member RAS oncogene family                                                            | 0.71 | 0.005 | 0.019 |
| 3405531 | <b>DDX47</b>   | DEAD (Asp-Glu-Ala-Asp) box polypeptide 47                                                    | 0.71 | 0.002 | 0.012 |
| 3362124 | <b>TMEM9B</b>  | TMEM9 domain family, member B                                                                | 0.71 | 0.001 | 0.008 |
| 2475209 | <b>PPP1CB</b>  | protein phosphatase 1, catalytic subunit, beta isozyme                                       | 0.71 | 0.000 | 0.005 |
| 2531712 | <b>PSMD1</b>   | proteasome (prosome, macropain) 26S subunit, non-ATPase, 1                                   | 0.71 | 0.001 | 0.008 |
| 2817386 | <b>PAPD4</b>   | PAP associated domain containing 4                                                           | 0.71 | 0.000 | 0.005 |
| 2394784 | <b>NOL9</b>    | nucleolar protein 9                                                                          | 0.71 | 0.000 | 0.004 |
| 2652410 | <b>FNDC3B</b>  | fibronectin type III domain containing 3B                                                    | 0.71 | 0.002 | 0.012 |
| 3716664 | <b>SUZ12P</b>  | suppressor of zeste 12 homolog pseudogene                                                    | 0.71 | 0.013 | 0.033 |
| 3489020 | <b>RB1</b>     | retinoblastoma 1                                                                             | 0.70 | 0.002 | 0.012 |
| 3564210 | <b>PYGL</b>    | phosphorylase, glycogen, liver                                                               | 0.70 | 0.026 | 0.049 |
| 3661718 | <b>LPCAT2</b>  | lysophosphatidylcholine acyltransferase 2                                                    | 0.70 | 0.012 | 0.031 |
| 2702154 | <b>SSR3</b>    | signal sequence receptor, gamma (translocon-associated protein gamma)                        | 0.70 | 0.015 | 0.035 |
| 3352904 | <b>SC5DL</b>   | sterol-C5-desaturase (ERG3 delta-5-desaturase homolog, <i>S. cerevisiae</i> )-like           | 0.70 | 0.003 | 0.015 |
| 2968232 | <b>SNX3</b>    | sorting nexin 3                                                                              | 0.70 | 0.003 | 0.013 |
| 2734629 | <b>PTPN13</b>  | protein tyrosine phosphatase, non-receptor type 13 (APO-1/CD95 (Fas)-associated phosphatase) | 0.70 | 0.004 | 0.017 |
| 3802129 | <b>SS18</b>    | synovial sarcoma translocation, chromosome 18                                                | 0.70 | 0.002 | 0.011 |
| 3443891 | <b>CLEC2B</b>  | C-type lectin domain family 2, member B                                                      | 0.70 | 0.013 | 0.033 |
| 2854737 | <b>PRKAA1</b>  | protein kinase, AMP-activated, alpha 1 catalytic subunit                                     | 0.70 | 0.000 | 0.005 |
| 2999485 | <b>STK17A</b>  | serine/threonine kinase 17a                                                                  | 0.70 | 0.005 | 0.018 |
| 3724197 | <b>NSF</b>     | N-ethylmaleimide-sensitive factor                                                            | 0.70 | 0.001 | 0.008 |
| 2480619 | <b>SOCS5</b>   | suppressor of cytokine signaling 5                                                           | 0.70 | 0.002 | 0.011 |
| 2403158 | <b>AHDC1</b>   | AT hook, DNA binding motif, containing 1                                                     | 0.70 | 0.000 | 0.003 |
| 2603460 | <b>NCL</b>     | nucleolin                                                                                    | 0.70 | 0.001 | 0.008 |
| 3538324 | <b>JKAMP</b>   | JNK1/MAPK8-associated membrane protein                                                       | 0.70 | 0.002 | 0.011 |
| 3683037 | <b>ARL6IP1</b> | ADP-ribosylation factor-like 6 interacting protein 1                                         | 0.70 | 0.012 | 0.031 |
| 3054165 | <b>SBDS</b>    | Shwachman-Bodian-Diamond syndrome                                                            | 0.70 | 0.010 | 0.028 |
| 3690193 | <b>ITFG1</b>   | integrin alpha FG-GAP repeat containing 1                                                    | 0.70 | 0.005 | 0.019 |
| 3497270 | <b>DNAJC3</b>  | DnaJ (Hsp40) homolog, subfamily C, member 3                                                  | 0.70 | 0.002 | 0.013 |
| 3351531 | <b>ARCN1</b>   | archain 1                                                                                    | 0.70 | 0.002 | 0.011 |
| 2932360 | <b>RBM16</b>   | RNA binding motif protein 16                                                                 | 0.69 | 0.000 | 0.004 |
| 2329752 | <b>ZMYM4</b>   | zinc finger, MYM-type 4                                                                      | 0.69 | 0.001 | 0.007 |
| 3535395 | <b>TMX1</b>    | thioredoxin-related transmembrane protein 1                                                  | 0.69 | 0.001 | 0.009 |
| 3351359 | <b>ATP5L</b>   | ATP synthase, H+ transporting, mitochondrial Fo complex, subunit G                           | 0.69 | 0.020 | 0.042 |
| 3901333 | <b>CST4</b>    | cystatin S                                                                                   | 0.69 | 0.009 | 0.026 |
| 3042919 | <b>HOXA9</b>   | homeobox A9                                                                                  | 0.69 | 0.000 | 0.004 |
| 3717635 | <b>ZNF207</b>  | zinc finger protein 207                                                                      | 0.69 | 0.001 | 0.009 |
| 3180263 | <b>HIATL1</b>  | hippocampus abundant transcript-like 1                                                       | 0.69 | 0.003 | 0.014 |
| 2787459 | <b>INPP4B</b>  | inositol polyphosphate-4-phosphatase, type II, 105kDa                                        | 0.69 | 0.001 | 0.007 |
| 2531779 | <b>ARMC9</b>   | armadillo repeat containing 9                                                                | 0.69 | 0.005 | 0.020 |
| 2989050 | <b>RAC1</b>    | ras-related C3 botulinum toxin substrate 1 (rho family, small GTP binding protein Rac1)      | 0.69 | 0.001 | 0.007 |
| 3574207 | <b>SEL1L</b>   | sel-1 suppressor of lin-12-like ( <i>C. elegans</i> )                                        | 0.69 | 0.003 | 0.015 |
| 3806913 | <b>SMAD2</b>   | SMAD family member 2                                                                         | 0.69 | 0.001 | 0.007 |
| 2434438 | <b>MCL1</b>    | myeloid cell leukemia sequence 1 (BCL2-related)                                              | 0.69 | 0.003 | 0.015 |
| 2613386 | <b>RAB5A</b>   | RAB5A, member RAS oncogene family                                                            | 0.69 | 0.002 | 0.011 |
| 3502710 | <b>TFDP1</b>   | transcription factor Dp-1                                                                    | 0.69 | 0.002 | 0.013 |
| 2964771 | <b>MAP3K7</b>  | mitogen-activated protein kinase kinase kinase 7                                             | 0.69 | 0.000 | 0.005 |
| 3346453 | <b>YAP1</b>    | Yes-associated protein 1                                                                     | 0.69 | 0.000 | 0.005 |



|         |                  |                                                                                              |      |       |       |
|---------|------------------|----------------------------------------------------------------------------------------------|------|-------|-------|
| 2542816 | <b>PUM2</b>      | pumilio homolog 2 (Drosophila)                                                               | 0.69 | 0.001 | 0.009 |
| 2727793 | <b>TMEM165</b>   | transmembrane protein 165                                                                    | 0.69 | 0.001 | 0.010 |
| 2774049 | <b>SCARB2</b>    | scavenger receptor class B, member 2                                                         | 0.69 | 0.002 | 0.012 |
| 3042421 | <b>HNRNPA2B1</b> | heterogeneous nuclear ribonucleoprotein A2/B1                                                | 0.69 | 0.003 | 0.015 |
| 2648378 | <b>RAP2B</b>     | RAP2B, member of RAS oncogene family                                                         | 0.69 | 0.000 | 0.002 |
| 3129121 | <b>CCDC25</b>    | coiled-coil domain containing 25                                                             | 0.69 | 0.000 | 0.005 |
| 3716048 | <b>TAOK1</b>     | TAO kinase 1                                                                                 | 0.69 | 0.001 | 0.008 |
| 2714644 | <b>C4ORF42</b>   | chromosome 4 open reading frame 42                                                           | 0.69 | 0.000 | 0.006 |
| 3148582 | <b>EIF3E</b>     | eukaryotic translation initiation factor 3, subunit E                                        | 0.69 | 0.000 | 0.005 |
| 2363919 | <b>ATF6</b>      | activating transcription factor 6                                                            | 0.68 | 0.000 | 0.005 |
| 3040363 | <b>TWIST1</b>    | twist homolog 1 (Drosophila)                                                                 | 0.68 | 0.004 | 0.017 |
| 2708922 | <b>IGF2BP2</b>   | insulin-like growth factor 2 mRNA binding protein 2                                          | 0.68 | 0.001 | 0.007 |
| 2416522 | <b>JAK1</b>      | Janus kinase 1                                                                               | 0.68 | 0.003 | 0.014 |
| 2550959 | <b>PREPL</b>     | prolyl endopeptidase-like                                                                    | 0.68 | 0.001 | 0.008 |
| 3592484 | <b>PLDN</b>      | pallidin homolog (mouse)                                                                     | 0.68 | 0.000 | 0.006 |
| 2822215 | <b>PAM</b>       | peptidylglycine alpha-amidating monooxygenase                                                | 0.68 | 0.008 | 0.025 |
| 3952718 | <b>UFD1L</b>     | ubiquitin fusion degradation 1 like (yeast)                                                  | 0.68 | 0.003 | 0.014 |
| 3003193 | <b>CCT6A</b>     | chaperonin containing TCP1, subunit 6A (zeta 1)                                              | 0.68 | 0.000 | 0.005 |
| 3326183 | <b>CAPRIN1</b>   | cell cycle associated protein 1                                                              | 0.68 | 0.002 | 0.011 |
| 2876046 | <b>PPP2CA</b>    | protein phosphatase 2, catalytic subunit, alpha isozyme                                      | 0.68 | 0.000 | 0.006 |
| 2688759 | <b>ATG3</b>      | ATG3 autophagy related 3 homolog (S. cerevisiae)                                             | 0.68 | 0.002 | 0.012 |
| 2769947 | <b>CLOCK</b>     | clock homolog (mouse)                                                                        | 0.68 | 0.000 | 0.005 |
| 3775686 | <b>USP14</b>     | ubiquitin specific peptidase 14 (tRNA-guanine transglycosylase)                              | 0.68 | 0.001 | 0.007 |
| 2817053 | <b>SCAMP1</b>    | secretory carrier membrane protein 1                                                         | 0.68 | 0.001 | 0.010 |
| 2382336 | <b>FBXO28</b>    | F-box protein 28                                                                             | 0.68 | 0.000 | 0.005 |
| 2860666 | <b>TAF9</b>      | TAF9 RNA polymerase II, TATA box binding protein (TBP)-associated factor, 32kDa              | 0.68 | 0.000 | 0.004 |
| 2863885 | <b>LHFPL2</b>    | lipoma HMGIC fusion partner-like 2                                                           | 0.68 | 0.001 | 0.009 |
| 3426215 | <b>MRPL42</b>    | mitochondrial ribosomal protein L42                                                          | 0.68 | 0.005 | 0.019 |
| 3680524 | <b>ZC3H7A</b>    | zinc finger CCCH-type containing 7A                                                          | 0.68 | 0.001 | 0.008 |
| 3284188 | <b>ITGB1</b>     | integrin, beta 1 (fibronectin receptor, beta polypeptide, antigen CD29 includes MDF2, MSK12) | 0.68 | 0.005 | 0.019 |
| 3740171 | <b>CRK</b>       | v-crk sarcoma virus CT10 oncogene homolog (avian)                                            | 0.68 | 0.001 | 0.009 |
| 2642325 | <b>ATP2C1</b>    | ATPase, Ca <sup>++</sup> transporting, type 2C, member 1                                     | 0.68 | 0.001 | 0.008 |
| 2922972 | <b>DCBLD1</b>    | discoidin, CUB and LCCL domain containing 1                                                  | 0.68 | 0.002 | 0.013 |
| 2582562 | <b>ACVR1</b>     | activin A receptor, type I                                                                   | 0.68 | 0.001 | 0.008 |
| 2842101 | <b>SFXN1</b>     | sideroflexin 1                                                                               | 0.68 | 0.001 | 0.009 |
| 2647216 | <b>HPS3</b>      | Hermansky-Pudlak syndrome 3                                                                  | 0.67 | 0.001 | 0.008 |
| 3096545 | <b>SGK196</b>    | protein kinase-like protein SgK196                                                           | 0.67 | 0.002 | 0.010 |
| 3909395 | <b>DPM1</b>      | dolichyl-phosphate mannosyltransferase polypeptide 1, catalytic subunit                      | 0.67 | 0.004 | 0.018 |
| 3147726 | <b>SLC25A32</b>  | solute carrier family 25, member 32                                                          | 0.67 | 0.001 | 0.009 |
| 2452637 | <b>NUCKS1</b>    | nuclear casein kinase and cyclin-dependent kinase substrate 1                                | 0.67 | 0.005 | 0.018 |
| 3556323 | <b>SUPT16H</b>   | suppressor of Ty 16 homolog (S. cerevisiae)                                                  | 0.67 | 0.004 | 0.016 |
| 3570454 | <b>COX16</b>     | COX16 cytochrome c oxidase assembly homolog (S. cerevisiae)                                  | 0.67 | 0.009 | 0.026 |
| 2823745 | <b>SLC25A46</b>  | solute carrier family 25, member 46                                                          | 0.67 | 0.000 | 0.004 |
| 2927506 | <b>TNFAIP3</b>   | tumor necrosis factor, alpha-induced protein 3                                               | 0.67 | 0.001 | 0.008 |
| 3755714 | <b>MED1</b>      | mediator complex subunit 1                                                                   | 0.67 | 0.001 | 0.008 |
| 3149754 | <b>EIF3H</b>     | eukaryotic translation initiation factor 3, subunit H                                        | 0.67 | 0.001 | 0.008 |
| 2418929 | <b>PIGK</b>      | phosphatidylinositol glycan anchor biosynthesis, class K                                     | 0.67 | 0.002 | 0.012 |
| 3847959 | <b>TUBB4Q</b>    | tubulin, beta 4 // tubulin, beta 4                                                           | 0.67 | 0.007 | 0.023 |
| 2470654 | <b>DDX1</b>      | DEAD (Asp-Glu-Ala-Asp) box polypeptide 1                                                     | 0.67 | 0.001 | 0.009 |
| 2423264 | <b>TMED5</b>     | transmembrane emp24 protein transport domain containing 5                                    | 0.67 | 0.000 | 0.004 |
| 3294438 | <b>ANXA7</b>     | annexin A7                                                                                   | 0.67 | 0.001 | 0.007 |
| 3850501 | <b>LOC147727</b> | hypothetical LOC147727                                                                       | 0.67 | 0.009 | 0.026 |
| 2496962 | <b>IL1R1</b>     | interleukin 1 receptor, type I                                                               | 0.67 | 0.010 | 0.027 |
| 2962767 | <b>PGM3</b>      | phosphoglucomutase 3                                                                         | 0.67 | 0.000 | 0.006 |
| 2615060 | <b>RBMS3</b>     | RNA binding motif, single stranded interacting protein 3                                     | 0.67 | 0.004 | 0.017 |
| 3533184 | <b>SSTR1</b>     | somatostatin receptor 1                                                                      | 0.67 | 0.007 | 0.024 |
| 2696252 | <b>RYK</b>       | RYK receptor-like tyrosine kinase                                                            | 0.67 | 0.002 | 0.011 |
| 2487696 | <b>PCYOX1</b>    | prenylcysteine oxidase 1                                                                     | 0.67 | 0.011 | 0.029 |
| 3469319 | <b>APPL2</b>     | adaptor protein, phosphotyrosine interaction, PH domain and leucine zipper containing 2      | 0.67 | 0.001 | 0.010 |
| 3518169 | <b>COMMD6</b>    | COMM domain containing 6                                                                     | 0.67 | 0.024 | 0.047 |
| 3998444 | <b>HDHD1</b>     | haloacid dehalogenase-like hydrolase domain containing 1                                     | 0.67 | 0.004 | 0.017 |
| 3400034 | <b>WNK1</b>      | WNK lysine deficient protein kinase 1                                                        | 0.67 | 0.001 | 0.008 |
| 3509910 | <b>FAM48A</b>    | family with sequence similarity 48, member A                                                 | 0.67 | 0.001 | 0.009 |
| 3775842 | <b>TYMS</b>      | thymidylate synthetase                                                                       | 0.66 | 0.017 | 0.038 |
| 3108433 | <b>MTDH</b>      | metadherin                                                                                   | 0.66 | 0.002 | 0.010 |
| 2620641 | <b>LIMD1</b>     | LIM domains containing 1                                                                     | 0.66 | 0.000 | 0.003 |
| 3018535 | <b>BCAP29</b>    | B-cell receptor-associated protein 29                                                        | 0.66 | 0.001 | 0.008 |

|         |                 |                                                                                                      |      |       |       |
|---------|-----------------|------------------------------------------------------------------------------------------------------|------|-------|-------|
| 2768981 | <b>SGCB</b>     | sarcoglycan, beta (43kDa dystrophin-associated glycoprotein)                                         | 0.66 | 0.014 | 0.034 |
| 3225348 | <b>PPP6C</b>    | protein phosphatase 6, catalytic subunit                                                             | 0.66 | 0.006 | 0.022 |
| 3629103 | <b>KIAA0101</b> | KIAA0101                                                                                             | 0.66 | 0.019 | 0.040 |
| 2645764 | <b>ATP1B3</b>   | ATPase, Na <sup>+</sup> /K <sup>+</sup> transporting, beta 3 polypeptide                             | 0.66 | 0.000 | 0.005 |
| 2644155 | <b>NCK1</b>     | NCK adaptor protein 1                                                                                | 0.66 | 0.001 | 0.007 |
| 3111530 | <b>ENY2</b>     | enhancer of yellow 2 homolog (Drosophila)                                                            | 0.66 | 0.005 | 0.019 |
| 4006841 | <b>SLC9A7</b>   | solute carrier family 9 (sodium/hydrogen exchanger), member 7                                        | 0.66 | 0.003 | 0.014 |
| 3074362 | <b>CNOT4</b>    | CCR4-NOT transcription complex, subunit 4                                                            | 0.66 | 0.000 | 0.003 |
| 3223928 | <b>STOM</b>     | stomatin                                                                                             | 0.66 | 0.008 | 0.024 |
| 3918574 | <b>IFNAR1</b>   | interferon (alpha, beta and omega) receptor 1                                                        | 0.66 | 0.001 | 0.007 |
| 3695268 | <b>NAE1</b>     | NEDD8 activating enzyme E1 subunit 1                                                                 | 0.66 | 0.000 | 0.006 |
| 2960010 | <b>LMBRD1</b>   | LMBR1 domain containing 1                                                                            | 0.66 | 0.008 | 0.025 |
| 3987996 | <b>PLS3</b>     | plastin 3                                                                                            | 0.66 | 0.010 | 0.028 |
| 2830010 | <b>SMAD5</b>    | SMAD family member 5                                                                                 | 0.66 | 0.000 | 0.004 |
| 3930360 | <b>RUNX1</b>    | runt-related transcription factor 1                                                                  | 0.66 | 0.000 | 0.006 |
| 3426917 | <b>METAP2</b>   | methionyl aminopeptidase 2                                                                           | 0.66 | 0.002 | 0.011 |
| 2476219 | <b>BIRC6</b>    | baculoviral IAP repeat-containing 6                                                                  | 0.66 | 0.001 | 0.007 |
| 2951916 | <b>STK38</b>    | serine/threonine kinase 38                                                                           | 0.66 | 0.005 | 0.018 |
| 3010082 | <b>PHTF2</b>    | putative homeodomain transcription factor 2                                                          | 0.66 | 0.000 | 0.006 |
| 3309215 | <b>EIF3A</b>    | eukaryotic translation initiation factor 3, subunit A                                                | 0.66 | 0.002 | 0.011 |
| 3445670 | <b>WBP11</b>    | WW domain binding protein 11                                                                         | 0.66 | 0.000 | 0.005 |
| 3765299 | <b>APPBP2</b>   | amyloid beta precursor protein (cytoplasmic tail) binding protein 2                                  | 0.66 | 0.000 | 0.003 |
| 2380991 | <b>IARS2</b>    | isoleucyl-tRNA synthetase 2, mitochondrial                                                           | 0.66 | 0.000 | 0.004 |
| 3252534 | <b>SAMD8</b>    | sterile alpha motif domain containing 8                                                              | 0.66 | 0.001 | 0.009 |
| 3147591 | <b>AZIN1</b>    | antizyme inhibitor 1                                                                                 | 0.66 | 0.001 | 0.009 |
| 2813364 | <b>SLC30A5</b>  | solute carrier family 30 (zinc transporter), member 5                                                | 0.66 | 0.000 | 0.006 |
| 2746269 | <b>LSM6</b>     | LSM6 homolog, U6 small nuclear RNA associated ( <i>S. cerevisiae</i> )                               | 0.65 | 0.003 | 0.015 |
| 2688882 | <b>C3ORF17</b>  | chromosome 3 open reading frame 17                                                                   | 0.65 | 0.000 | 0.004 |
| 2455418 | <b>PTPN14</b>   | protein tyrosine phosphatase, non-receptor type 14                                                   | 0.65 | 0.001 | 0.008 |
| 2929168 | <b>UTRN</b>     | utrophin                                                                                             | 0.65 | 0.002 | 0.012 |
| 3090922 | <b>PPP2R2A</b>  | protein phosphatase 2, regulatory subunit B, alpha                                                   | 0.65 | 0.000 | 0.003 |
| 3427767 | <b>TMPO</b>     | thymopoietin                                                                                         | 0.65 | 0.010 | 0.027 |
| 3559570 | <b>HECTD1</b>   | HECT domain containing 1                                                                             | 0.65 | 0.003 | 0.014 |
| 3047660 | <b>GLI3</b>     | GLI family zinc finger 3                                                                             | 0.65 | 0.008 | 0.025 |
| 3134034 | <b>PRKDC</b>    | protein kinase, DNA-activated, catalytic polypeptide                                                 | 0.65 | 0.003 | 0.015 |
| 3624607 | <b>MYO5A</b>    | myosin VA (heavy chain 12, myosin)                                                                   | 0.65 | 0.000 | 0.005 |
| 2974188 | <b>MED23</b>    | mediator complex subunit 23                                                                          | 0.65 | 0.000 | 0.005 |
| 3591963 | <b>EIF3J</b>    | eukaryotic translation initiation factor 3, subunit J                                                | 0.65 | 0.004 | 0.018 |
| 3717395 | <b>SUZ12</b>    | suppressor of zeste 12 homolog ( <i>Drosophila</i> )                                                 | 0.65 | 0.001 | 0.009 |
| 3460593 | <b>TMBIM4</b>   | transmembrane BAX inhibitor motif containing 4                                                       | 0.65 | 0.001 | 0.010 |
| 2580635 | <b>MMADHC</b>   | methylmalonic aciduria (cobalamin deficiency) cblD type, with homocystinuria                         | 0.65 | 0.002 | 0.013 |
| 2412624 | <b>RAB3B</b>    | RAB3B, member RAS oncogene family                                                                    | 0.65 | 0.017 | 0.038 |
| 3087501 | <b>ZDHC2</b>    | zinc finger, DHHC-type containing 2                                                                  | 0.65 | 0.000 | 0.001 |
| 3431376 | <b>ANKRD13A</b> | ankyrin repeat domain 13A                                                                            | 0.65 | 0.005 | 0.018 |
| 3974838 | <b>DDX3X</b>    | DEAD (Asp-Glu-Ala-Asp) box polypeptide 3, X-linked                                                   | 0.65 | 0.004 | 0.016 |
| 2610336 | <b>VHL</b>      | von Hippel-Lindau tumor suppressor                                                                   | 0.65 | 0.001 | 0.007 |
| 2921296 | <b>AMD1</b>     | adenosylmethionine decarboxylase 1                                                                   | 0.65 | 0.005 | 0.018 |
| 2957596 | <b>ELOVL5</b>   | ELOVL family member 5, elongation of long chain fatty acids (FEN1/Elo2, SUR4/Elo3-like, yeast)       | 0.65 | 0.003 | 0.016 |
| 2457496 | <b>HHIP2</b>    | HHIP-like 2                                                                                          | 0.65 | 0.010 | 0.028 |
| 3453218 | <b>CCNT1</b>    | cyclin T1                                                                                            | 0.65 | 0.002 | 0.011 |
| 2371346 | <b>RGL1</b>     | ral guanine nucleotide dissociation stimulator-like 1                                                | 0.65 | 0.000 | 0.004 |
| 3379777 | <b>MRGPRF</b>   | MAS-related GPR, member F                                                                            | 0.65 | 0.001 | 0.008 |
| 2476116 | <b>SLC30A6</b>  | solute carrier family 30 (zinc transporter), member 6                                                | 0.65 | 0.000 | 0.006 |
| 2709631 | <b>MASP1</b>    | mannan-binding lectin serine peptidase 1 (C4/C2 activating component of Ra-reactive factor)          | 0.65 | 0.024 | 0.047 |
| 2728189 | <b>PAICS</b>    | phosphoribosylaminoimidazole carboxylase, phosphoribosylaminoimidazole succinocarboxamide synthetase | 0.64 | 0.000 | 0.004 |
| 2355615 | <b>SEC22B</b>   | SEC22 vesicle trafficking protein homolog B ( <i>S. cerevisiae</i> ) (gene/pseudogene)               | 0.64 | 0.002 | 0.013 |
| 2733287 | <b>PRDM8</b>    | PR domain containing 8                                                                               | 0.64 | 0.000 | 0.002 |
| 2404254 | <b>PUM1</b>     | pumilio homolog 1 ( <i>Drosophila</i> )                                                              | 0.64 | 0.000 | 0.005 |
| 3598959 | <b>SMAD3</b>    | SMAD family member 3                                                                                 | 0.64 | 0.002 | 0.011 |
| 3518455 | <b>FBXL3</b>    | F-box and leucine-rich repeat protein 3                                                              | 0.64 | 0.004 | 0.017 |
| 3497659 | <b>RAP2A</b>    | RAP2A, member of RAS oncogene family                                                                 | 0.64 | 0.009 | 0.026 |
| 3532313 | <b>SRP54</b>    | signal recognition particle 54kDa                                                                    | 0.64 | 0.002 | 0.011 |
| 3460127 | <b>GNS</b>      | glucosamine (N-acetyl)-6-sulfatase                                                                   | 0.64 | 0.003 | 0.014 |
| 3212143 | <b>UBQLN1</b>   | ubiquilin 1                                                                                          | 0.64 | 0.001 | 0.009 |
| 3958005 | <b>C22ORF30</b> | chromosome 22 open reading frame 30                                                                  | 0.64 | 0.000 | 0.003 |
| 3229943 | <b>SDCCAG3</b>  | serologically defined colon cancer antigen 3                                                         | 0.64 | 0.000 | 0.004 |

|         |                  |                                                                                 |      |       |       |
|---------|------------------|---------------------------------------------------------------------------------|------|-------|-------|
| 3326635 | <b>CD44</b>      | CD44 molecule (Indian blood group)                                              | 0.64 | 0.000 | 0.003 |
| 3512527 | <b>TPT1</b>      | tumor protein, translationally-controlled 1                                     | 0.64 | 0.002 | 0.012 |
| 3592023 | <b>B2M</b>       | beta-2-microglobulin                                                            | 0.64 | 0.005 | 0.019 |
| 2389789 | <b>SCCPDH</b>    | saccharopine dehydrogenase (putative)                                           | 0.64 | 0.002 | 0.011 |
| 2633773 | <b>TFG</b>       | TRK-fused gene                                                                  | 0.64 | 0.000 | 0.005 |
| 3535922 | <b>STYX</b>      | serine/threonine/tyrosine interacting protein                                   | 0.64 | 0.006 | 0.021 |
| 3956290 | <b>PITPNB</b>    | phosphatidylinositol transfer protein, beta                                     | 0.64 | 0.001 | 0.009 |
| 3929395 | <b>GCFC1</b>     | GC-rich sequence DNA-binding factor 1                                           | 0.64 | 0.021 | 0.043 |
| 2857131 | <b>DHX29</b>     | DEAH (Asp-Glu-Ala-His) box polypeptide 29                                       | 0.64 | 0.001 | 0.007 |
| 2515276 | <b>DYNC112</b>   | dynein, cytoplasmic 1, intermediate chain 2                                     | 0.64 | 0.004 | 0.016 |
| 2752006 | <b>SAP30</b>     | Sin3A-associated protein, 30kDa                                                 | 0.64 | 0.000 | 0.002 |
| 3293244 | <b>SAR1A</b>     | SAR1 homolog A ( <i>S. cerevisiae</i> )                                         | 0.64 | 0.003 | 0.016 |
| 2928392 | <b>VTA1</b>      | Vps20-associated 1 homolog ( <i>S. cerevisiae</i> )                             | 0.64 | 0.002 | 0.011 |
| 2424524 | <b>DPYD</b>      | dihydropyrimidine dehydrogenase                                                 | 0.63 | 0.002 | 0.013 |
| 3162529 | <b>C9ORF150</b>  | chromosome 9 open reading frame 150                                             | 0.63 | 0.001 | 0.007 |
| 2553576 | <b>RTN4</b>      | reticulin 4                                                                     | 0.63 | 0.000 | 0.005 |
| 3815165 | <b>PTBP1</b>     | polypyrimidine tract binding protein 1                                          | 0.63 | 0.000 | 0.004 |
| 2421883 | <b>GBP1</b>      | guanylate binding protein 1, interferon-inducible, 67kDa                        | 0.63 | 0.024 | 0.046 |
| 2772017 | <b>YTHDC1</b>    | YTH domain containing 1                                                         | 0.63 | 0.000 | 0.006 |
| 2344542 | <b>RPF1</b>      | ribosome production factor 1 homolog ( <i>S. cerevisiae</i> )                   | 0.63 | 0.001 | 0.009 |
| 2373336 | <b>CFH</b>       | complement factor H                                                             | 0.63 | 0.015 | 0.035 |
| 3778601 | <b>VAPA</b>      | VAMP (vesicle-associated membrane protein)-associated protein A, 33kDa          | 0.63 | 0.000 | 0.004 |
| 3058991 | <b>CACNA2D1</b>  | calcium channel, voltage-dependent, alpha 2/delta subunit 1                     | 0.63 | 0.001 | 0.009 |
| 3651955 | <b>METTL9</b>    | methyltransferase like 9                                                        | 0.63 | 0.003 | 0.013 |
| 3456630 | <b>CBX5</b>      | chromobox homolog 5                                                             | 0.63 | 0.008 | 0.024 |
| 3681956 | <b>KIAA0430</b>  | KIAA0430                                                                        | 0.63 | 0.003 | 0.014 |
| 3144235 | <b>TMEM55A</b>   | transmembrane protein 55A                                                       | 0.63 | 0.000 | 0.004 |
| 2573232 | <b>TMEM185B</b>  | transmembrane protein 185B (pseudogene)                                         | 0.63 | 0.000 | 0.002 |
| 3974708 | <b>USP9X</b>     | ubiquitin specific peptidase 9, X-linked                                        | 0.63 | 0.008 | 0.024 |
| 3429460 | <b>TXNRD1</b>    | thioredoxin reductase 1                                                         | 0.63 | 0.009 | 0.026 |
| 3762473 | <b>TOB1</b>      | transducer of ERBB2, 1                                                          | 0.63 | 0.000 | 0.006 |
| 3567984 | <b>PPP2R5E</b>   | protein phosphatase 2, regulatory subunit B', epsilon isoform                   | 0.63 | 0.000 | 0.006 |
| 3773426 | <b>NPTX1</b>     | neuronal pentraxin I                                                            | 0.63 | 0.026 | 0.049 |
| 2356344 | <b>RNF115</b>    | ring finger protein 115                                                         | 0.63 | 0.006 | 0.020 |
| 2866590 | <b>LYSMD3</b>    | LysM, putative peptidoglycan-binding, domain containing 3                       | 0.63 | 0.005 | 0.018 |
| 3033924 | <b>UBE3C</b>     | ubiquitin protein ligase E3C                                                    | 0.63 | 0.000 | 0.005 |
| 3954238 | <b>MAPK1</b>     | mitogen-activated protein kinase 1                                              | 0.63 | 0.001 | 0.009 |
| 3597521 | <b>APH1B</b>     | anterior pharynx defective 1 homolog B ( <i>C. elegans</i> )                    | 0.63 | 0.000 | 0.004 |
| 2506570 | <b>GPR39</b>     | G protein-coupled receptor 39                                                   | 0.63 | 0.003 | 0.015 |
| 2491336 | <b>KCMF1</b>     | potassium channel modulatory factor 1                                           | 0.63 | 0.002 | 0.011 |
| 2496628 | <b>C2ORF29</b>   | chromosome 2 open reading frame 29                                              | 0.63 | 0.000 | 0.005 |
| 2676319 | <b>GLT8D1</b>    | glycosyltransferase 8 domain containing 1                                       | 0.63 | 0.002 | 0.011 |
| 3478457 | <b>STX2</b>      | syntaxin 2                                                                      | 0.63 | 0.005 | 0.019 |
| 2926969 | <b>PDE7B</b>     | phosphodiesterase 7B                                                            | 0.63 | 0.002 | 0.011 |
| 2330899 | <b>UTP11L</b>    | UTP11-like, U3 small nucleolar ribonucleoprotein, (yeast)                       | 0.63 | 0.001 | 0.007 |
| 3697799 | <b>AP1G1</b>     | adaptor-related protein complex 1, gamma 1 subunit                              | 0.63 | 0.002 | 0.011 |
| 2464484 | <b>FAM36A</b>    | family with sequence similarity 36, member A                                    | 0.63 | 0.002 | 0.011 |
| 2639129 | <b>DIRC2</b>     | disrupted in renal carcinoma 2                                                  | 0.63 | 0.003 | 0.014 |
| 2415084 | <b>JUN</b>       | jun proto-oncogene                                                              | 0.63 | 0.000 | 0.005 |
| 3917155 | <b>USP16</b>     | ubiquitin specific peptidase 16                                                 | 0.63 | 0.002 | 0.012 |
| 2419046 | <b>ZZZ3</b>      | zinc finger, ZZ-type containing 3                                               | 0.62 | 0.001 | 0.008 |
| 2796790 | <b>KIAA1430</b>  | KIAA1430                                                                        | 0.62 | 0.002 | 0.013 |
| 3110272 | <b>FZD6</b>      | frizzled homolog 6 ( <i>Drosophila</i> )                                        | 0.62 | 0.010 | 0.028 |
| 3094778 | <b>TACC1</b>     | transforming, acidic coiled-coil containing protein 1                           | 0.62 | 0.002 | 0.011 |
| 3359910 | <b>NUP98</b>     | nucleoporin 98kDa                                                               | 0.62 | 0.000 | 0.006 |
| 3603199 | <b>IDH3A</b>     | isocitrate dehydrogenase 3 (NAD+) alpha                                         | 0.62 | 0.008 | 0.024 |
| 2653932 | <b>MFN1</b>      | mitofusin 1                                                                     | 0.62 | 0.000 | 0.005 |
| 2777412 | <b>PIGY</b>      | phosphatidylinositol glycan anchor biosynthesis, class Y                        | 0.62 | 0.003 | 0.014 |
| 3225398 | <b>HSPA5</b>     | heat shock 70kDa protein 5 (glucose-regulated protein, 78kDa)                   | 0.62 | 0.008 | 0.025 |
| 2319252 | <b>SPSB1</b>     | splA/ryanodine receptor domain and SOCS box containing 1                        | 0.62 | 0.000 | 0.004 |
| 3545525 | <b>C14ORF156</b> | chromosome 14 open reading frame 156                                            | 0.62 | 0.015 | 0.036 |
| 3592755 | <b>SEMA6D</b>    | sema domain, transmembrane domain (TM), and cytoplasmic domain, (semaphorin) 6D | 0.62 | 0.004 | 0.016 |
| 2530599 | <b>AGFG1</b>     | ArfGAP with FG repeats 1                                                        | 0.62 | 0.002 | 0.011 |
| 3240340 | <b>WAC</b>       | WW domain containing adaptor with coiled-coil                                   | 0.62 | 0.001 | 0.010 |
| 3725779 | <b>MYST2</b>     | MYST histone acetyltransferase 2                                                | 0.62 | 0.000 | 0.006 |
| 3067302 | <b>LAMB1</b>     | laminin, beta 1                                                                 | 0.62 | 0.010 | 0.028 |
| 2783316 | <b>SEC24D</b>    | SEC24 family, member D ( <i>S. cerevisiae</i> )                                 | 0.62 | 0.004 | 0.017 |
| 3220977 | <b>ROD1</b>      | ROD1 regulator of differentiation 1 ( <i>S. pombe</i> )                         | 0.62 | 0.011 | 0.029 |
| 2808438 | <b>NNT</b>       | nicotinamide nucleotide transhydrogenase                                        | 0.62 | 0.003 | 0.014 |

|         |                 |                                                                              |      |       |       |
|---------|-----------------|------------------------------------------------------------------------------|------|-------|-------|
| 4019900 | <b>CUL4B</b>    | cullin 4B                                                                    | 0.62 | 0.004 | 0.016 |
| 2784687 | <b>ANKRD50</b>  | ankyrin repeat domain 50                                                     | 0.62 | 0.004 | 0.016 |
| 3886512 | <b>TTPAL</b>    | tocopherol (alpha) transfer protein-like                                     | 0.62 | 0.001 | 0.008 |
| 2863730 | <b>AP3B1</b>    | adaptor-related protein complex 3, beta 1 subunit                            | 0.62 | 0.004 | 0.016 |
| 3677795 | <b>CREBBP</b>   | CREB binding protein                                                         | 0.62 | 0.000 | 0.004 |
| 3636470 | <b>BTBD1</b>    | BTB (POZ) domain containing 1                                                | 0.62 | 0.000 | 0.003 |
| 2680819 | <b>SUCLG2</b>   | succinate-CoA ligase, GDP-forming, beta subunit                              | 0.62 | 0.011 | 0.030 |
| 3362468 | <b>SBF2</b>     | SET binding factor 2                                                         | 0.61 | 0.006 | 0.020 |
| 2925590 | <b>TMEM200A</b> | transmembrane protein 200A                                                   | 0.61 | 0.006 | 0.022 |
| 2853768 | <b>NUP155</b>   | nucleoporin 155kDa                                                           | 0.61 | 0.005 | 0.019 |
| 3414739 | <b>METTL7A</b>  | methyltransferase like 7A                                                    | 0.61 | 0.001 | 0.009 |
| 2446198 | <b>TOR1AIP2</b> | torsin A interacting protein 2                                               | 0.61 | 0.000 | 0.006 |
| 3725392 | <b>CALCOCO2</b> | calcium binding and coiled-coil domain 2                                     | 0.61 | 0.000 | 0.006 |
| 2609608 | <b>SETD5</b>    | SET domain containing 5                                                      | 0.61 | 0.000 | 0.005 |
| 3882854 | <b>ITCH</b>     | itchy E3 ubiquitin protein ligase homolog (mouse)                            | 0.61 | 0.001 | 0.009 |
| 3332015 | <b>OR4D10</b>   | olfactory receptor, family 4, subfamily D, member 10                         | 0.61 | 0.015 | 0.035 |
| 3092325 | <b>DCTN6</b>    | dynactin 6                                                                   | 0.61 | 0.002 | 0.011 |
| 3167220 | <b>UBE2R2</b>   | ubiquitin-conjugating enzyme E2R 2                                           | 0.61 | 0.000 | 0.003 |
| 3542207 | <b>SRSF5</b>    | serine/arginine-rich splicing factor 5                                       | 0.61 | 0.003 | 0.015 |
| 2430370 | <b>GDAP2</b>    | ganglioside induced differentiation associated protein 2                     | 0.61 | 0.001 | 0.009 |
| 2975287 | <b>HBS1L</b>    | HBS1-like (S. cerevisiae)                                                    | 0.61 | 0.001 | 0.007 |
| 3792952 | <b>SOCS6</b>    | suppressor of cytokine signaling 6                                           | 0.61 | 0.002 | 0.010 |
| 2951674 | <b>SRPK1</b>    | SRSF protein kinase 1                                                        | 0.61 | 0.000 | 0.005 |
| 2484970 | <b>EHBP1</b>    | EH domain binding protein 1                                                  | 0.61 | 0.003 | 0.016 |
| 3348852 | <b>DLAT</b>     | dihydroliipoamide S-acetyltransferase                                        | 0.61 | 0.000 | 0.004 |
| 3980887 | <b>NONO</b>     | non-POU domain containing, octamer-binding                                   | 0.61 | 0.001 | 0.008 |
| 3149528 | <b>TRPS1</b>    | trichorhinophalangeal syndrome 1                                             | 0.61 | 0.007 | 0.023 |
| 3474372 | <b>PXN</b>      | paxillin                                                                     | 0.61 | 0.000 | 0.003 |
| 2345196 | <b>HS2ST1</b>   | heparan sulfate 2-O-sulfotransferase 1                                       | 0.61 | 0.000 | 0.003 |
| 2577958 | <b>DARS</b>     | aspartyl-tRNA synthetase                                                     | 0.61 | 0.000 | 0.005 |
| 3043165 | <b>HIBADH</b>   | 3-hydroxyisobutyrate dehydrogenase                                           | 0.61 | 0.018 | 0.040 |
| 2608801 | <b>EDEM1</b>    | ER degradation enhancer, mannosidase alpha-like 1                            | 0.61 | 0.001 | 0.009 |
| 2469910 | <b>LPIN1</b>    | lipin 1                                                                      | 0.61 | 0.000 | 0.004 |
| 2437417 | <b>ASH1L</b>    | ash1 (absent, small, or homeotic)-like (Drosophila)                          | 0.61 | 0.003 | 0.014 |
| 2659918 | <b>LRCH3</b>    | leucine-rich repeats and calponin homology (CH) domain containing 3          | 0.61 | 0.001 | 0.009 |
| 3388914 | <b>DCUN1D5</b>  | DCN1, defective in cullin neddylation 1, domain containing 5 (S. cerevisiae) | 0.61 | 0.000 | 0.003 |
| 2485257 | <b>UGP2</b>     | UDP-glucose pyrophosphorylase 2                                              | 0.61 | 0.005 | 0.018 |
| 2805581 | <b>SUB1</b>     | SUB1 homolog (S. cerevisiae)                                                 | 0.61 | 0.004 | 0.017 |
| 3304012 | <b>MGEA5</b>    | meningioma expressed antigen 5 (hyaluronidase)                               | 0.61 | 0.001 | 0.009 |
| 2763805 | <b>DHX15</b>    | DEAH (Asp-Glu-Ala-His) box polypeptide 15                                    | 0.61 | 0.001 | 0.008 |
| 3019981 | <b>MDFIC</b>    | MyoD family inhibitor domain containing                                      | 0.61 | 0.001 | 0.007 |
| 3623771 | <b>TRPM7</b>    | transient receptor potential cation channel, subfamily M, member 7           | 0.61 | 0.003 | 0.013 |
| 2335132 | <b>CMPK1</b>    | cytidine monophosphate (UMP-CMP) kinase 1, cytosolic                         | 0.61 | 0.005 | 0.019 |
| 3428131 | <b>SCYL2</b>    | SCY1-like 2 (S. cerevisiae)                                                  | 0.61 | 0.004 | 0.016 |
| 3488985 | <b>ITM2B</b>    | integral membrane protein 2B                                                 | 0.61 | 0.010 | 0.027 |
| 2880932 | <b>CSNK1A1</b>  | casein kinase 1, alpha 1                                                     | 0.61 | 0.000 | 0.005 |
| 3720228 | <b>CDK12</b>    | cyclin-dependent kinase 12                                                   | 0.61 | 0.000 | 0.005 |
| 3774635 | <b>FASN</b>     | fatty acid synthase                                                          | 0.60 | 0.001 | 0.008 |
| 3303165 | <b>DNMBP</b>    | dynamamin binding protein                                                    | 0.60 | 0.000 | 0.004 |
| 2382117 | <b>CAPN2</b>    | calpain 2, (m/II) large subunit                                              | 0.60 | 0.001 | 0.007 |
| 2458701 | <b>ACBD3</b>    | acyl-CoA binding domain containing 3                                         | 0.60 | 0.001 | 0.006 |
| 2676041 | <b>WDR82</b>    | WD repeat domain 82                                                          | 0.60 | 0.015 | 0.035 |
| 3318009 | <b>RRM1</b>     | ribonucleotide reductase M1                                                  | 0.60 | 0.024 | 0.047 |
| 3319937 | <b>WEE1</b>     | WEE1 homolog (S. pombe)                                                      | 0.60 | 0.002 | 0.012 |
| 3191589 | <b>FUBP3</b>    | far upstream element (FUSE) binding protein 3                                | 0.60 | 0.001 | 0.007 |
| 3670668 | <b>ATMIN</b>    | ATM interactor                                                               | 0.60 | 0.001 | 0.007 |
| 3564919 | <b>FERMT2</b>   | fermitin family member 2                                                     | 0.60 | 0.024 | 0.046 |
| 2828856 | <b>HSPA4</b>    | heat shock 70kDa protein 4                                                   | 0.60 | 0.001 | 0.009 |
| 3342983 | <b>TMEM126B</b> | transmembrane protein 126B                                                   | 0.60 | 0.001 | 0.010 |
| 2962820 | <b>ME1</b>      | malic enzyme 1, NADP(+)-dependent, cytosolic                                 | 0.60 | 0.005 | 0.018 |
| 2364677 | <b>PBX1</b>     | pre-B-cell leukemia homeobox 1                                               | 0.60 | 0.010 | 0.028 |
| 2641263 | <b>RAB7A</b>    | RAB7A, member RAS oncogene family                                            | 0.60 | 0.002 | 0.012 |
| 3707352 | <b>RNF167</b>   | ring finger protein 167                                                      | 0.60 | 0.000 | 0.003 |
| 3728889 | <b>TMEM49</b>   | transmembrane protein 49                                                     | 0.60 | 0.000 | 0.006 |
| 3178545 | <b>C9ORF47</b>  | chromosome 9 open reading frame 47                                           | 0.60 | 0.002 | 0.013 |
| 2916390 | <b>ORC3</b>     | origin recognition complex, subunit 3                                        | 0.60 | 0.002 | 0.011 |
| 3974556 | <b>ATP6AP2</b>  | ATPase, H+ transporting, lysosomal accessory protein 2                       | 0.60 | 0.007 | 0.022 |
| 3599495 | <b>CORO2B</b>   | coronin, actin binding protein, 2B                                           | 0.60 | 0.023 | 0.045 |
| 2807862 | <b>C5ORF51</b>  | chromosome 5 open reading frame 51                                           | 0.60 | 0.010 | 0.027 |

|         |                  |                                                                              |      |       |       |
|---------|------------------|------------------------------------------------------------------------------|------|-------|-------|
| 2894711 | <b>TMEM14B</b>   | transmembrane protein 14B                                                    | 0.60 | 0.023 | 0.046 |
| 3181302 | <b>NCBP1</b>     | nuclear cap binding protein subunit 1, 80kDa                                 | 0.60 | 0.001 | 0.010 |
| 2859195 | <b>DIMT1L</b>    | DIM1 dimethyladenosine transferase 1-like ( <i>S. cerevisiae</i> )           | 0.60 | 0.000 | 0.003 |
| 3772661 | <b>TIMP2</b>     | TIMP metalloproteinase inhibitor 2                                           | 0.60 | 0.000 | 0.004 |
| 3253683 | <b>ZMIZ1</b>     | zinc finger, MIZ-type containing 1                                           | 0.60 | 0.000 | 0.006 |
| 3732230 | <b>PITPNC1</b>   | phosphatidylinositol transfer protein, cytoplasmic 1                         | 0.60 | 0.006 | 0.021 |
| 2574798 | <b>MAP3K2</b>    | mitogen-activated protein kinase kinase kinase 2                             | 0.60 | 0.000 | 0.005 |
| 2886130 | <b>PANK3</b>     | pantothenate kinase 3                                                        | 0.60 | 0.001 | 0.008 |
| 2427469 | <b>SLC16A4</b>   | solute carrier family 16, member 4 (monocarboxylic acid transporter 5)       | 0.60 | 0.009 | 0.026 |
| 3499453 | <b>TPP2</b>      | tripeptidyl peptidase II                                                     | 0.60 | 0.000 | 0.006 |
| 3125775 | <b>CNOT7</b>     | CCR4-NOT transcription complex, subunit 7                                    | 0.60 | 0.002 | 0.013 |
| 3220513 | <b>KIAA0368</b>  | KIAA0368                                                                     | 0.60 | 0.003 | 0.014 |
| 3473083 | <b>MED13L</b>    | mediator complex subunit 13-like                                             | 0.60 | 0.005 | 0.019 |
| 2407729 | <b>RRAGC</b>     | Ras-related GTP binding C                                                    | 0.60 | 0.002 | 0.012 |
| 3134922 | <b>PCMTD1</b>    | protein-L-isoaspartate (D-aspartate) O-methyltransferase domain containing 1 | 0.60 | 0.025 | 0.048 |
| 2772614 | <b>GRSF1</b>     | G-rich RNA sequence binding factor 1                                         | 0.60 | 0.000 | 0.005 |
| 3494102 | <b>UCHL3</b>     | ubiquitin carboxyl-terminal esterase L3 (ubiquitin thiolesterase)            | 0.60 | 0.002 | 0.013 |
| 3279108 | <b>NMT2</b>      | N-myristoyltransferase 2                                                     | 0.60 | 0.007 | 0.023 |
| 2542737 | <b>LAPTM4A</b>   | lysosomal protein transmembrane 4 alpha                                      | 0.60 | 0.000 | 0.006 |
| 3552847 | <b>DYNC1H1</b>   | dynein, cytoplasmic 1, heavy chain 1                                         | 0.60 | 0.005 | 0.019 |
| 2369339 | <b>RALGPS2</b>   | Ral GEF with PH domain and SH3 binding motif 2                               | 0.60 | 0.003 | 0.015 |
| 4022781 | <b>FAM122B</b>   | family with sequence similarity 122B                                         | 0.60 | 0.000 | 0.003 |
| 2982381 | <b>TCP1</b>      | t-complex 1                                                                  | 0.60 | 0.004 | 0.016 |
| 2594812 | <b>TRAK2</b>     | trafficking protein, kinesin binding 2                                       | 0.60 | 0.005 | 0.019 |
| 2790570 | <b>PLRG1</b>     | pleiotropic regulator 1 (PRL1 homolog, Arabidopsis)                          | 0.60 | 0.002 | 0.012 |
| 2977265 | <b>HIVEP2</b>    | human immunodeficiency virus type I enhancer binding protein 2               | 0.60 | 0.001 | 0.009 |
| 2676219 | <b>PBRM1</b>     | polybromo 1                                                                  | 0.59 | 0.002 | 0.013 |
| 3026988 | <b>LUC7L2</b>    | LUC7-like 2 ( <i>S. cerevisiae</i> )                                         | 0.59 | 0.001 | 0.008 |
| 3929664 | <b>TMEM50B</b>   | transmembrane protein 50B                                                    | 0.59 | 0.003 | 0.015 |
| 3489212 | <b>FNDC3A</b>    | fibronectin type III domain containing 3A                                    | 0.59 | 0.000 | 0.004 |
| 2558150 | <b>AAK1</b>      | AP2 associated kinase 1                                                      | 0.59 | 0.001 | 0.007 |
| 2349863 | <b>NTNG1</b>     | netrin G1                                                                    | 0.59 | 0.001 | 0.009 |
| 2506903 | <b>MGAT5</b>     | mannosyl (alpha-1,6-)-glycoprotein beta-1,6-N-acetylglucosaminyltransferase  | 0.59 | 0.005 | 0.018 |
| 2418000 | <b>ZRANB2</b>    | zinc finger, RAN-binding domain containing 2                                 | 0.59 | 0.000 | 0.006 |
| 4012868 | <b>RLIM</b>      | ring finger protein, LIM domain interacting                                  | 0.59 | 0.009 | 0.026 |
| 2887633 | <b>BOD1</b>      | bioorientation of chromosomes in cell division 1                             | 0.59 | 0.001 | 0.008 |
| 2468811 | <b>ASAP2</b>     | ArfGAP with SH3 domain, ankyrin repeat and PH domain 2                       | 0.59 | 0.000 | 0.003 |
| 2402459 | <b>STMN1</b>     | stathmin 1                                                                   | 0.59 | 0.017 | 0.038 |
| 3337618 | <b>PPP6R3</b>    | protein phosphatase 6, regulatory subunit 3                                  | 0.59 | 0.001 | 0.008 |
| 3237548 | <b>ARL5B</b>     | ADP-ribosylation factor-like 5B                                              | 0.59 | 0.008 | 0.024 |
| 3371719 | <b>CKAP5</b>     | cytoskeleton associated protein 5                                            | 0.59 | 0.007 | 0.022 |
| 3812206 | <b>TMX3</b>      | thioredoxin-related transmembrane protein 3                                  | 0.59 | 0.002 | 0.012 |
| 3591838 | <b>CASC4</b>     | cancer susceptibility candidate 4                                            | 0.59 | 0.001 | 0.007 |
| 3240095 | <b>RAB18</b>     | RAB18, member RAS oncogene family                                            | 0.59 | 0.020 | 0.041 |
| 3431483 | <b>ATP2A2</b>    | ATPase, Ca <sup>++</sup> transporting, cardiac muscle, slow twitch 2         | 0.59 | 0.006 | 0.020 |
| 3537813 | <b>ACTR10</b>    | actin-related protein 10 homolog ( <i>S. cerevisiae</i> )                    | 0.59 | 0.005 | 0.019 |
| 2712858 | <b>UBXN7</b>     | UBX domain protein 7                                                         | 0.59 | 0.003 | 0.015 |
| 3163136 | <b>SNAPC3</b>    | small nuclear RNA activating complex, polypeptide 3, 50kDa                   | 0.59 | 0.005 | 0.018 |
| 2973995 | <b>EPB41L2</b>   | erythrocyte membrane protein band 4.1-like 2                                 | 0.59 | 0.002 | 0.013 |
| 3246372 | <b>NCOA4</b>     | nuclear receptor coactivator 4                                               | 0.59 | 0.006 | 0.020 |
| 3984655 | <b>CENPI</b>     | centromere protein I                                                         | 0.59 | 0.009 | 0.026 |
| 3467315 | <b>IKBIP</b>     | IKBKB interacting protein                                                    | 0.59 | 0.001 | 0.007 |
| 3537264 | <b>C14ORF101</b> | chromosome 14 open reading frame 101                                         | 0.59 | 0.000 | 0.005 |
| 2345617 | <b>PKN2</b>      | protein kinase N2                                                            | 0.59 | 0.002 | 0.012 |
| 3565303 | <b>CNIH</b>      | cornichon homolog ( <i>Drosophila</i> )                                      | 0.59 | 0.002 | 0.011 |
| 2529546 | <b>ACSL3</b>     | acyl-CoA synthetase long-chain family member 3                               | 0.59 | 0.001 | 0.008 |
| 3414561 | <b>DIP2B</b>     | DIP2 disco-interacting protein 2 homolog B ( <i>Drosophila</i> )             | 0.59 | 0.000 | 0.004 |
| 2402942 | <b>SLC9A1</b>    | solute carrier family 9 (sodium/hydrogen exchanger), member 1                | 0.59 | 0.000 | 0.002 |
| 2454378 | <b>SLC30A1</b>   | solute carrier family 30 (zinc transporter), member 1                        | 0.59 | 0.001 | 0.007 |
| 3907234 | <b>SDC4</b>      | syndecan 4                                                                   | 0.59 | 0.001 | 0.009 |
| 3217736 | <b>ERP44</b>     | endoplasmic reticulum protein 44                                             | 0.59 | 0.002 | 0.011 |
| 3921391 | <b>WRB</b>       | tryptophan rich basic protein                                                | 0.59 | 0.014 | 0.033 |
| 3030285 | <b>CUL1</b>      | cullin 1                                                                     | 0.59 | 0.000 | 0.006 |
| 2930592 | <b>TAB2</b>      | TGF-beta activated kinase 1/MAP3K7 binding protein 2                         | 0.59 | 0.003 | 0.014 |
| 2403557 | <b>SNORA44</b>   | small nucleolar RNA, H/ACA box 44                                            | 0.59 | 0.008 | 0.024 |
| 3462949 | <b>OSBPL8</b>    | oxysterol binding protein-like 8                                             | 0.59 | 0.015 | 0.035 |
| 3992354 | <b>SLC9A6</b>    | solute carrier family 9 (sodium/hydrogen exchanger), member 6                | 0.59 | 0.000 | 0.005 |
| 3506153 | <b>MTMR6</b>     | myotubularin related protein 6                                               | 0.59 | 0.002 | 0.013 |

|         |                  |                                                                    |       |       |       |
|---------|------------------|--------------------------------------------------------------------|-------|-------|-------|
| 3716411 | <b>CPD</b>       | carboxypeptidase D                                                 | 0.59  | 0.023 | 0.045 |
| 2998333 | <b>C7ORF36</b>   | chromosome 7 open reading frame 36                                 | 0.59  | 0.013 | 0.032 |
| 3781531 | <b>CABLES1</b>   | Cdk5 and Abl enzyme substrate 1                                    | -0.59 | 0.011 | 0.029 |
| 3337835 | <b>IGHMBP2</b>   | immunoglobulin mu binding protein 2                                | -0.59 | 0.002 | 0.010 |
| 3676262 | <b>SEPX1</b>     | selenoprotein X, 1                                                 | -0.59 | 0.002 | 0.011 |
| 2558736 | <b>ADD2</b>      | adducin 2 (beta)                                                   | -0.59 | 0.000 | 0.003 |
| 3378210 | <b>BRMS1</b>     | breast cancer metastasis suppressor 1                              | -0.59 | 0.020 | 0.042 |
| 3205033 | <b>YBX1</b>      | Y box binding protein 1                                            | -0.59 | 0.018 | 0.039 |
| 3191074 | <b>METTL11A</b>  | methyltransferase like 11A                                         | -0.59 | 0.001 | 0.008 |
| 3947036 | <b>MEI1</b>      | meiosis inhibitor 1                                                | -0.59 | 0.001 | 0.008 |
| 3376832 | <b>BAD</b>       | BCL2-associated agonist of cell death                              | -0.59 | 0.001 | 0.009 |
| 3540398 | <b>FNTB</b>      | farnesyltransferase, CAAX box, beta                                | -0.59 | 0.000 | 0.003 |
| 3238761 | <b>MSRB2</b>     | methionine sulfoxide reductase B2                                  | -0.59 | 0.000 | 0.005 |
| 2562271 | <b>CAPG</b>      | capping protein (actin filament), gelsolin-like                    | -0.60 | 0.021 | 0.043 |
| 2492783 | <b>THNSL2</b>    | threonine synthase-like 2 (S. cerevisiae)                          | -0.60 | 0.005 | 0.019 |
| 3884158 | <b>MANBAL</b>    | mannosidase, beta A, lysosomal-like                                | -0.60 | 0.000 | 0.004 |
| 2451043 | <b>LMOD1</b>     | leiomodulin 1 (smooth muscle)                                      | -0.61 | 0.023 | 0.045 |
| 3073981 | <b>AKR1B1</b>    | aldo-keto reductase family 1, member B1 (aldose reductase)         | -0.61 | 0.014 | 0.033 |
| 2450668 | <b>TMEM9</b>     | transmembrane protein 9                                            | -0.61 | 0.000 | 0.004 |
| 3957679 | <b>SELM</b>      | selenoprotein M                                                    | -0.61 | 0.002 | 0.011 |
| 3903836 | <b>EIF6</b>      | eukaryotic translation initiation factor 6                         | -0.61 | 0.002 | 0.012 |
| 2453881 | <b>IRF6</b>      | interferon regulatory factor 6                                     | -0.61 | 0.005 | 0.019 |
| 3601511 | <b>ISLR</b>      | immunoglobulin superfamily containing leucine-rich repeat          | -0.61 | 0.010 | 0.028 |
| 3936951 | <b>SEPT5</b>     | septin 5                                                           | -0.62 | 0.001 | 0.007 |
| 3607183 | <b>MRPS11</b>    | mitochondrial ribosomal protein S11                                | -0.62 | 0.001 | 0.007 |
| 2427208 | <b>GSTM3</b>     | glutathione S-transferase mu 3 (brain)                             | -0.62 | 0.005 | 0.020 |
| 3942838 | <b>LIMK2</b>     | LIM domain kinase 2                                                | -0.62 | 0.000 | 0.005 |
| 3824874 | <b>IFI30</b>     | interferon, gamma-inducible protein 30                             | -0.62 | 0.013 | 0.033 |
| 3714659 | <b>DHRS7B</b>    | dehydrogenase/reductase (SDR family) member 7B                     | -0.62 | 0.000 | 0.004 |
| 2333658 | <b>ATP6V0B</b>   | ATPase, H+ transporting, lysosomal 21kDa, V0 subunit b             | -0.63 | 0.001 | 0.009 |
| 3837081 | <b>NPAS1</b>     | neuronal PAS domain protein 1                                      | -0.63 | 0.000 | 0.006 |
| 3830189 | <b>FXYP1</b>     | FXYP domain containing ion transport regulator 1                   | -0.64 | 0.001 | 0.009 |
| 2528774 | <b>SLC4A3</b>    | solute carrier family 4, anion exchanger, member 3                 | -0.64 | 0.000 | 0.003 |
| 2545953 | <b>FNDC4</b>     | fibronectin type III domain containing 4                           | -0.64 | 0.009 | 0.026 |
| 3923764 | <b>LRRRC3</b>    | leucine rich repeat containing 3                                   | -0.65 | 0.003 | 0.015 |
| 3921933 | <b>BACE2</b>     | beta-site APP-cleaving enzyme 2                                    | -0.65 | 0.011 | 0.029 |
| 3825823 | <b>NDUFA13</b>   | NADH dehydrogenase (ubiquinone) 1 alpha subcomplex, 13             | -0.65 | 0.001 | 0.007 |
| 3832292 | <b>KCNK6</b>     | potassium channel, subfamily K, member 6                           | -0.65 | 0.005 | 0.020 |
| 2875193 | <b>P4HA2</b>     | prolyl 4-hydroxylase, alpha polypeptide II                         | -0.66 | 0.000 | 0.006 |
| 2397025 | <b>DHRS3</b>     | dehydrogenase/reductase (SDR family) member 3                      | -0.66 | 0.016 | 0.036 |
| 3953524 | <b>SCARF2</b>    | scavenger receptor class F, member 2                               | -0.66 | 0.000 | 0.005 |
| 3750939 | <b>SDF2</b>      | stromal cell-derived factor 2                                      | -0.66 | 0.001 | 0.010 |
| 2899171 | <b>HIST1H1E</b>  | histone cluster 1, H1e                                             | -0.67 | 0.025 | 0.048 |
| 3194613 | <b>TMEM141</b>   | transmembrane protein 141                                          | -0.67 | 0.002 | 0.012 |
| 3351775 | <b>TRAPPC4</b>   | trafficking protein particle complex 4                             | -0.68 | 0.001 | 0.010 |
| 4012154 | <b>RPS4X</b>     | ribosomal protein S4, X-linked                                     | -0.68 | 0.000 | 0.004 |
| 3645626 | <b>IL32</b>      | interleukin 32                                                     | -0.68 | 0.015 | 0.035 |
| 2899216 | <b>HIST1H4E</b>  | histone cluster 1, H4e                                             | -0.68 | 0.002 | 0.013 |
| 3881045 | <b>FAM182A</b>   | family with sequence similarity 182, member A                      | -0.68 | 0.002 | 0.012 |
| 3064591 | <b>FIS1</b>      | fission 1 (mitochondrial outer membrane) homolog (S. cerevisiae)   | -0.68 | 0.003 | 0.015 |
| 3771642 | <b>CYGB</b>      | cytoglobin                                                         | -0.69 | 0.012 | 0.032 |
| 3168255 | <b>HRCT1</b>     | histidine rich carboxyl terminus 1                                 | -0.69 | 0.005 | 0.020 |
| 3638760 | <b>IDH2</b>      | isocitrate dehydrogenase 2 (NADP+), mitochondrial                  | -0.69 | 0.000 | 0.005 |
| 3708160 | <b>ALOX12</b>    | arachidonate 12-lipoxygenase                                       | -0.69 | 0.001 | 0.009 |
| 3416977 | <b>ORMDL2</b>    | ORM1-like 2 (S. cerevisiae)                                        | -0.70 | 0.000 | 0.002 |
| 3982462 | <b>PGK1</b>      | phosphoglycerate kinase 1                                          | -0.70 | 0.003 | 0.013 |
| 3403077 | <b>C12ORF57</b>  | chromosome 12 open reading frame 57                                | -0.70 | 0.002 | 0.012 |
| 3337137 | <b>AIP</b>       | aryl hydrocarbon receptor interacting protein                      | -0.70 | 0.001 | 0.008 |
| 3436329 | <b>FAM101A</b>   | family with sequence similarity 101, member A                      | -0.71 | 0.001 | 0.009 |
| 3336680 | <b>RHOD</b>      | ras homolog gene family, member D                                  | -0.71 | 0.002 | 0.012 |
| 3403015 | <b>ENO2</b>      | enolase 2 (gamma, neuronal)                                        | -0.71 | 0.000 | 0.004 |
| 2491676 | <b>VAMP5</b>     | vesicle-associated membrane protein 5 (myobrevin)                  | -0.71 | 0.007 | 0.022 |
| 2950798 | <b>C6ORF125</b>  | chromosome 6 open reading frame 125                                | -0.72 | 0.000 | 0.006 |
| 3907011 | <b>ADA</b>       | adenosine deaminase                                                | -0.74 | 0.004 | 0.016 |
| 3455973 | <b>SPRYD3</b>    | SPRY domain containing 3                                           | -0.74 | 0.000 | 0.002 |
| 3924041 | <b>ADARB1</b>    | adenosine deaminase, RNA-specific, B1                              | -0.74 | 0.001 | 0.010 |
| 3883236 | <b>MMP24</b>     | matrix metalloproteinase 24 (membrane-inserted)                    | -0.75 | 0.000 | 0.003 |
| 3557209 | <b>SLC7A8</b>    | solute carrier family 7 (amino acid transporter, L-type), member 8 | -0.75 | 0.003 | 0.015 |
| 3315217 | <b>C10ORF125</b> | chromosome 10 open reading frame 125                               | -0.75 | 0.001 | 0.007 |
| 2335048 | <b>CYP4A22</b>   | cytochrome P450, family 4, subfamily A, polypeptide 22             | -0.75 | 0.001 | 0.009 |

|         |                 |                                                                                    |       |       |       |
|---------|-----------------|------------------------------------------------------------------------------------|-------|-------|-------|
| 3415915 | <b>PFDN5</b>    | prefoldin subunit 5                                                                | -0.76 | 0.000 | 0.003 |
| 3355145 | <b>ST3GAL4</b>  | ST3 beta-galactoside alpha-2,3-sialyltransferase 4                                 | -0.76 | 0.000 | 0.002 |
| 2977690 | <b>SF3B5</b>    | splicing factor 3b, subunit 5, 10kDa                                               | -0.76 | 0.008 | 0.024 |
| 2447148 | <b>RGS16</b>    | regulator of G-protein signaling 16                                                | -0.76 | 0.003 | 0.015 |
| 3853108 | <b>NOTCH3</b>   | notch 3                                                                            | -0.76 | 0.015 | 0.035 |
| 2902935 | <b>STK19</b>    | serine/threonine kinase 19                                                         | -0.77 | 0.000 | 0.001 |
| 3863869 | <b>PSG8</b>     | pregnancy specific beta-1-glycoprotein 8                                           | -0.79 | 0.011 | 0.030 |
| 3164086 | <b>ADAMTSL1</b> | ADAMTS-like 1                                                                      | -0.80 | 0.005 | 0.019 |
| 3694215 | <b>CDH8</b>     | cadherin 8, type 2                                                                 | -0.80 | 0.021 | 0.043 |
| 3555736 | <b>NDRG2</b>    | NDRG family member 2                                                               | -0.81 | 0.000 | 0.001 |
| 3855104 | <b>CRLF1</b>    | cytokine receptor-like factor 1                                                    | -0.81 | 0.011 | 0.029 |
| 3527684 | <b>RNASE3</b>   | ribonuclease, RNase A family, 3                                                    | -0.82 | 0.000 | 0.006 |
| 3725714 | <b>NXPH3</b>    | neurexophilin 3                                                                    | -0.82 | 0.000 | 0.006 |
| 4007437 | <b>SLC38A5</b>  | solute carrier family 38, member 5                                                 | -0.82 | 0.006 | 0.021 |
| 4007216 | <b>UXT</b>      | ubiquitously-expressed transcript                                                  | -0.83 | 0.000 | 0.004 |
| 3865635 | <b>DMPK</b>     | dystrophia myotonica-protein kinase                                                | -0.83 | 0.000 | 0.003 |
| 2450865 | <b>CSRP1</b>    | cysteine and glycine-rich protein 1                                                | -0.84 | 0.001 | 0.009 |
| 3707199 | <b>PSMB6</b>    | proteasome (prosome, macropain) subunit, beta type, 6                              | -0.84 | 0.001 | 0.008 |
| 3986514 | <b>PRPS1</b>    | phosphoribosyl pyrophosphate synthetase 1                                          | -0.85 | 0.010 | 0.028 |
| 3708074 | <b>XAF1</b>     | XIAP associated factor 1                                                           | -0.86 | 0.023 | 0.046 |
| 2805635 | <b>NPR3</b>     | natriuretic peptide receptor C/guanylate cyclase C (atriuretic peptide receptor C) | -0.87 | 0.024 | 0.047 |
| 3903052 | <b>SNTA1</b>    | syntrophin, alpha 1 (dystrophin-associated protein A1, 59kDa, acidic component)    | -0.88 | 0.000 | 0.003 |
| 4022370 | <b>GPC4</b>     | glypican 4                                                                         | -0.88 | 0.002 | 0.011 |
| 3513147 | <b>HTR2A</b>    | 5-hydroxytryptamine (serotonin) receptor 2A                                        | -0.89 | 0.004 | 0.017 |
| 3719962 | <b>PSMB3</b>    | proteasome (prosome, macropain) subunit, beta type, 3                              | -0.91 | 0.001 | 0.009 |
| 3394315 | <b>C1QTNF5</b>  | C1q and tumor necrosis factor related protein 5                                    | -0.92 | 0.000 | 0.001 |
| 3333622 | <b>POLR2G</b>   | polymerase (RNA) II (DNA directed) polypeptide G                                   | -0.94 | 0.000 | 0.002 |
| 2489606 | <b>POLE4</b>    | polymerase (DNA-directed), epsilon 4 (p12 subunit)                                 | -0.94 | 0.000 | 0.005 |
| 3756689 | <b>KRTAP1-1</b> | keratin associated protein 1-1                                                     | -0.95 | 0.021 | 0.043 |
| 2828787 | <b>UQCRCQ</b>   | ubiquinol-cytochrome c reductase, complex III subunit VII, 9.5kDa                  | -0.95 | 0.000 | 0.004 |
| 3671695 | <b>WFDC1</b>    | WAP four-disulfide core domain 1                                                   | -0.95 | 0.010 | 0.028 |
| 3557048 | <b>PSMB5</b>    | proteasome (prosome, macropain) subunit, beta type, 5                              | -0.96 | 0.000 | 0.004 |
| 2946232 | <b>HIST1H1C</b> | histone cluster 1, H1c                                                             | -0.96 | 0.001 | 0.008 |
| 3286776 | <b>C10ORF10</b> | chromosome 10 open reading frame 10                                                | -0.97 | 0.000 | 0.003 |
| 2600089 | <b>PTPRN</b>    | protein tyrosine phosphatase, receptor type, N                                     | -0.98 | 0.002 | 0.010 |
| 3816509 | <b>GADD45B</b>  | growth arrest and DNA-damage-inducible, beta                                       | -0.98 | 0.000 | 0.001 |
| 2383859 | <b>GUK1</b>     | guanylate kinase 1                                                                 | -0.99 | 0.000 | 0.004 |
| 2351004 | <b>GSTM5</b>    | glutathione S-transferase mu 5                                                     | -1.00 | 0.025 | 0.048 |
| 2716328 | <b>ADRA2C</b>   | adrenergic, alpha-2C-, receptor                                                    | -1.01 | 0.000 | 0.006 |
| 3328600 | <b>TSPAN18</b>  | tetraspanin 18                                                                     | -1.03 | 0.019 | 0.040 |
| 3169331 | <b>ALDH1B1</b>  | aldehyde dehydrogenase 1 family, member B1                                         | -1.04 | 0.000 | 0.005 |
| 2328320 | <b>TINAGL1</b>  | tubulointerstitial nephritis antigen-like 1                                        | -1.04 | 0.005 | 0.019 |
| 3726252 | <b>SGCA</b>     | sarcoglycan, alpha (50kDa dystrophin-associated glycoprotein)                      | -1.06 | 0.000 | 0.004 |
| 3750767 | <b>ALDOC</b>    | aldolase C, fructose-bisphosphate                                                  | -1.08 | 0.000 | 0.003 |
| 3638819 | <b>CIB1</b>     | calcium and integrin binding 1 (calmyrin)                                          | -1.08 | 0.000 | 0.003 |
| 3417457 | <b>MYL6</b>     | myosin, light chain 6, alkali, smooth muscle and non-muscle                        | -1.09 | 0.000 | 0.001 |
| 3638188 | <b>HAPLN3</b>   | hyaluronan and proteoglycan link protein 3                                         | -1.10 | 0.010 | 0.028 |
| 2451693 | <b>FMOD</b>     | fibromodulin                                                                       | -1.10 | 0.015 | 0.035 |
| 3350830 | <b>TAGLN</b>    | transgelin                                                                         | -1.10 | 0.001 | 0.008 |
| 3756911 | <b>KRT34</b>    | keratin 34                                                                         | -1.14 | 0.013 | 0.032 |
| 2475678 | <b>LBH</b>      | limb bud and heart development homolog (mouse)                                     | -1.15 | 0.002 | 0.011 |
| 2397898 | <b>HSPB7</b>    | heat shock 27kDa protein family, member 7 (cardiovascular)                         | -1.17 | 0.007 | 0.023 |
| 2401493 | <b>ID3</b>      | inhibitor of DNA binding 3, dominant negative helix-loop-helix protein             | -1.19 | 0.005 | 0.019 |
| 2764192 | <b>SEL1L3</b>   | sel-1 suppressor of lin-12-like 3 (C. elegans)                                     | -1.20 | 0.000 | 0.004 |
| 3667508 | <b>CALB2</b>    | calbindin 2                                                                        | -1.20 | 0.001 | 0.008 |
| 3414440 | <b>C12ORF62</b> | chromosome 12 open reading frame 62                                                | -1.21 | 0.000 | 0.005 |
| 3630736 | <b>ITGA11</b>   | integrin, alpha 11                                                                 | -1.21 | 0.002 | 0.010 |
| 3852381 | <b>PODNL1</b>   | podocan-like 1                                                                     | -1.23 | 0.000 | 0.001 |
| 3299970 | <b>ANKRD1</b>   | ankyrin repeat domain 1 (cardiac muscle)                                           | -1.28 | 0.013 | 0.032 |
| 3391149 | <b>FDXACB1</b>  | ferredoxin-fold anticodon binding domain containing 1                              | -1.28 | 0.000 | 0.002 |
| 3821263 | <b>CNN1</b>     | calponin 1, basic, smooth muscle                                                   | -1.33 | 0.000 | 0.004 |
| 3349858 | <b>NNMT</b>     | nicotinamide N-methyltransferase                                                   | -1.35 | 0.000 | 0.001 |
| 3617712 | <b>GJD2</b>     | gap junction protein, delta 2, 36kDa                                               | -1.36 | 0.000 | 0.003 |
| 3815097 | <b>FSTL3</b>    | follicle-stimulating-like 3 (secreted glycoprotein)                                | -1.39 | 0.000 | 0.003 |
| 4035833 | <b>CD24</b>     | CD24 molecule                                                                      | -1.42 | 0.001 | 0.010 |
| 3299504 | <b>ACTA2</b>    | actin, alpha 2, smooth muscle, aorta                                               | -1.46 | 0.003 | 0.013 |
| 2363618 | <b>SDHC</b>     | succinate dehydrogenase complex, subunit C, integral membrane protein, 15kDa       | -1.46 | 0.001 | 0.007 |
| 3944210 | <b>RASD2</b>    | RASD family, member 2                                                              | -1.61 | 0.004 | 0.016 |

|         |              |                                     |       |       |       |
|---------|--------------|-------------------------------------|-------|-------|-------|
| 3394264 | <b>MCAM</b>  | melanoma cell adhesion molecule     | -1.69 | 0.000 | 0.002 |
| 3443226 | <b>MFAP5</b> | microfibrillar associated protein 5 | -2.09 | 0.001 | 0.009 |
| 3855218 | <b>COMP</b>  | cartilage oligomeric matrix protein | -2.09 | 0.000 | 0.002 |
| 3607332 | <b>ACAN</b>  | aggrecan                            | -2.90 | 0.000 | 0.004 |
| 3617719 | <b>ACTC1</b> | actin, alpha, cardiac muscle 1      | -2.95 | 0.001 | 0.007 |

1153 protein coding genes (1012 up and 141 down) were identified as significantly differentially expressed in BS cells using the following cutoff: absolute expression ratio (ER)  $\geq 1.5$  and false discovery rate (FDR)  $< 0.05$ . Thus significantly differentially expressed genes have  $\log_2$  expression values of  $\geq |0.59|$ .



**Table S2B. Significantly differentially expressed mRNAs identified in BLM-depleted compared with isogenic, nonspecific shRNA-treated control human 82-6 fibroblasts**

| Probe Set ID | Gene Symbol     | Gene Description                                                                | log <sub>2</sub> (ER) | unadjusted P-Value | FDR     |
|--------------|-----------------|---------------------------------------------------------------------------------|-----------------------|--------------------|---------|
| 2931036      | <b>ULBP1</b>    | UL16 binding protein 1                                                          | 5.05                  | 3.3E-10            | 9.8E-08 |
| 2731542      | <b>AREG</b>     | amphiregulin                                                                    | 3.95                  | 1.3E-10            | 7.6E-08 |
| 3998766      | <b>KAL1</b>     | Kallmann syndrome 1 sequence                                                    | 3.81                  | 1.4E-11            | 2.2E-08 |
| 3768412      | <b>SLC16A6</b>  | solute carrier family 16, member 6 (monocarboxylic acid transporter 7)          | 3.66                  | 1.0E-10            | 7.6E-08 |
| 2710599      | <b>CLDN1</b>    | claudin 1                                                                       | 3.17                  | 1.6E-09            | 2.1E-07 |
| 2642720      | <b>ACPP</b>     | acid phosphatase, prostate                                                      | 2.88                  | 1.5E-09            | 2.1E-07 |
| 3464276      | <b>SLC6A15</b>  | solute carrier family 6 (neutral amino acid transporter), member 15             | 2.85                  | 5.0E-10            | 1.3E-07 |
| 3849894      | <b>OLFM2</b>    | olfactomedin 2                                                                  | 2.73                  | 9.1E-11            | 7.6E-08 |
| 3727928      | <b>NOG</b>      | noggin                                                                          | 2.46                  | 7.3E-07            | 1.3E-05 |
| 3927480      | <b>ADAMTS5</b>  | ADAM metalloproteinase with thrombospondin type 1 motif, 5                      | 2.31                  | 6.9E-08            | 2.5E-06 |
| 3801492      | <b>ANKRD29</b>  | ankyrin repeat domain 29                                                        | 2.30                  | 4.4E-09            | 3.8E-07 |
| 3401704      | <b>CCND2</b>    | cyclin D2                                                                       | 2.28                  | 3.0E-09            | 3.1E-07 |
| 3354443      | <b>SLC37A2</b>  | solute carrier family 37 (glycerol-3-phosphate transporter), member 2           | 2.26                  | 3.4E-09            | 3.3E-07 |
| 3282974      | <b>SVIL</b>     | supervillin                                                                     | 2.19                  | 8.3E-09            | 5.8E-07 |
| 2648677      | <b>MME</b>      | membrane metallo-endopeptidase                                                  | 2.15                  | 2.8E-08            | 1.3E-06 |
| 3132782      | <b>SFRP1</b>    | secreted frizzled-related protein 1                                             | 2.13                  | 6.3E-10            | 1.3E-07 |
| 3463112      | <b>E2F7</b>     | E2F transcription factor 7                                                      | 2.08                  | 4.2E-09            | 3.7E-07 |
| 3546924      | <b>FLRT2</b>    | fibronectin leucine rich transmembrane protein 2                                | 2.04                  | 6.8E-08            | 2.4E-06 |
| 3262129      | <b>INA</b>      | internexin neuronal intermediate filament protein, alpha                        | 2.03                  | 4.5E-10            | 1.2E-07 |
| 2786322      | <b>SLC7A11</b>  | solute carrier family 7, (cationic amino acid transporter, y+ system) member 11 | 2.01                  | 3.3E-07            | 7.4E-06 |
| 3285119      | <b>FZD8</b>     | frizzled homolog 8 (Drosophila)                                                 | 2.00                  | 8.2E-10            | 1.5E-07 |
| 3058944      | <b>HGF</b>      | hepatocyte growth factor (hepapoietin A; scatter factor)                        | 1.99                  | 1.3E-05            | 1.1E-04 |
| 3186491      | <b>PAPPA</b>    | pregnancy-associated plasma protein A, pappalysin 1                             | 1.98                  | 2.4E-08            | 1.2E-06 |
| 2817941      | <b>RASGRF2</b>  | Ras protein-specific guanine nucleotide-releasing factor 2                      | 1.98                  | 1.2E-08            | 7.1E-07 |
| 2946383      | <b>HIST1H4H</b> | histone cluster 1, H4h                                                          | 1.88                  | 9.2E-06            | 8.6E-05 |
| 2791419      | <b>FAM198B</b>  | family with sequence similarity 198, member B                                   | 1.88                  | 8.3E-07            | 1.5E-05 |
| 2571483      | <b>IL1A</b>     | interleukin 1, alpha                                                            | 1.81                  | 3.5E-06            | 4.1E-05 |
| 3519309      | <b>SPRY2</b>    | sprouty homolog 2 (Drosophila)                                                  | 1.81                  | 2.7E-09            | 2.8E-07 |
| 3104489      | <b>STMN2</b>    | stathmin-like 2                                                                 | 1.81                  | 1.9E-08            | 1.0E-06 |
| 3908358      | <b>SULF2</b>    | sulfatase 2                                                                     | 1.80                  | 1.4E-10            | 7.6E-08 |
| 3279313      | <b>ITGA8</b>    | integrin, alpha 8                                                               | 1.80                  | 1.7E-09            | 2.2E-07 |
| 2818517      | <b>VCAN</b>     | versican                                                                        | 1.79                  | 2.4E-07            | 5.8E-06 |
| 2809245      | <b>ITGA2</b>    | integrin, alpha 2 (CD49B, alpha 2 subunit of VLA-2 receptor)                    | 1.76                  | 7.5E-09            | 5.5E-07 |
| 3590275      | <b>CHAC1</b>    | ChaC, cation transport regulator homolog 1 (E. coli)                            | 1.73                  | 2.3E-10            | 9.7E-08 |
| 2930418      | <b>UST</b>      | uronyl-2-sulfotransferase                                                       | 1.73                  | 1.3E-08            | 7.8E-07 |
| 4004853      | <b>SRPX</b>     | sushi-repeat-containing protein, X-linked                                       | 1.73                  | 1.0E-09            | 1.6E-07 |
| 2904485      | <b>SCUBE3</b>   | signal peptide, CUB domain, EGF-like 3                                          | 1.73                  | 1.2E-10            | 7.6E-08 |
| 3790704      | <b>PMAIP1</b>   | phorbol-12-myristate-13-acetate-induced protein 1                               | 1.72                  | 3.5E-08            | 1.5E-06 |
| 2476510      | <b>LTBP1</b>    | latent transforming growth factor beta binding protein 1                        | 1.70                  | 4.8E-08            | 1.9E-06 |
| 3862873      | <b>CYP2A6</b>   | cytochrome P450, family 2, subfamily A, polypeptide 6                           | 1.69                  | 6.6E-03            | 1.5E-02 |
| 3356539      | <b>NTM</b>      | neurotrimin                                                                     | 1.68                  | 1.0E-08            | 6.7E-07 |
| 3781531      | <b>CABLES1</b>  | Cdk5 and Abl enzyme substrate 1                                                 | 1.67                  | 4.2E-07            | 8.8E-06 |
| 3386217      | <b>CHORDC1</b>  | cysteine and histidine-rich domain (CHORD)-containing 1                         | 1.66                  | 3.9E-05            | 2.6E-04 |
| 3143660      | <b>MMP16</b>    | matrix metalloproteinase 16 (membrane-inserted)                                 | 1.65                  | 1.2E-08            | 7.5E-07 |
| 2771342      | <b>EPHA5</b>    | EPH receptor A5                                                                 | 1.64                  | 7.1E-06            | 7.1E-05 |
| 3020192      | <b>TES</b>      | testis derived transcript (3 LIM domains)                                       | 1.63                  | 4.4E-08            | 1.8E-06 |
| 2913694      | <b>CD109</b>    | CD109 molecule                                                                  | 1.61                  | 5.0E-07            | 9.9E-06 |
| 3801943      | <b>ZNF521</b>   | zinc finger protein 521                                                         | 1.61                  | 3.9E-08            | 1.6E-06 |
| 2474071      | <b>MAPRE3</b>   | microtubule-associated protein, RP/EB family, member 3                          | 1.61                  | 4.4E-06            | 4.9E-05 |
| 3819474      | <b>ANGPTL4</b>  | angiopoietin-like 4                                                             | 1.59                  | 9.6E-09            | 6.4E-07 |
| 3808745      | <b>CCDC68</b>   | coiled-coil domain containing 68                                                | 1.59                  | 4.9E-07            | 9.8E-06 |
| 3128046      | <b>STC1</b>     | stanniocalcin 1                                                                 | 1.57                  | 1.1E-07            | 3.4E-06 |
| 3073013      | <b>PODXL</b>    | podocalyxin-like                                                                | 1.56                  | 1.2E-07            | 3.7E-06 |
| 2956052      | <b>TNFRSF21</b> | tumor necrosis factor receptor superfamily, member 21                           | 1.54                  | 9.2E-09            | 6.2E-07 |
| 2872047      | <b>SEMA6A</b>   | sema domain, transmembrane domain (TM), and cytoplasmic domain, (semaphorin) 6A | 1.53                  | 1.0E-07            | 3.2E-06 |
| 2671787      | <b>TMEM158</b>  | transmembrane protein 158 (gene/pseudogene)                                     | 1.50                  | 4.7E-09            | 4.0E-07 |
| 3162529      | <b>C9ORF150</b> | chromosome 9 open reading frame 150                                             | 1.49                  | 4.9E-08            | 1.9E-06 |
| 2343823      | <b>LPHN2</b>    | latrophilin 2                                                                   | 1.48                  | 1.3E-05            | 1.1E-04 |
| 3771642      | <b>CYGB</b>     | cytoglobin                                                                      | 1.47                  | 5.7E-09            | 4.5E-07 |
| 3068097      | <b>DOCK4</b>    | dedicator of cytokinesis 4                                                      | 1.46                  | 7.1E-08            | 2.5E-06 |
| 2611056      | <b>PPARG</b>    | peroxisome proliferator-activated receptor gamma                                | 1.45                  | 2.2E-08            | 1.1E-06 |
| 2711610      | <b>LRRC15</b>   | leucine rich repeat containing 15                                               | 1.45                  | 1.2E-08            | 7.5E-07 |
| 2794704      | <b>ASB5</b>     | ankyrin repeat and SOCS box-containing 5                                        | 1.42                  | 1.5E-06            | 2.3E-05 |
| 3039177      | <b>ETV1</b>     | ets variant 1                                                                   | 1.41                  | 2.4E-08            | 1.2E-06 |
| 3971806      | <b>SAT1</b>     | spermidine/spermine N1-acetyltransferase 1                                      | 1.41                  | 2.4E-08            | 1.2E-06 |
| 4004819      | <b>DYNLT3</b>   | dynein, light chain, Tctex-type 3                                               | 1.40                  | 6.6E-06            | 6.7E-05 |

|         |                  |                                                                                 |      |         |         |
|---------|------------------|---------------------------------------------------------------------------------|------|---------|---------|
| 2835792 | <b>GM2A</b>      | GM2 ganglioside activator                                                       | 1.36 | 1.5E-09 | 2.1E-07 |
| 2566848 | <b>AFF3</b>      | AF4/FMR2 family, member 3                                                       | 1.35 | 1.5E-07 | 4.2E-06 |
| 2970086 | <b>LAMA4</b>     | laminin, alpha 4                                                                | 1.35 | 3.1E-07 | 7.1E-06 |
| 3732793 | <b>ARSG</b>      | arylsulfatase G                                                                 | 1.35 | 3.8E-08 | 1.6E-06 |
| 3844470 | <b>PPAP2C</b>    | phosphatidic acid phosphatase type 2C                                           | 1.34 | 1.3E-09 | 1.9E-07 |
| 2925590 | <b>TMEM200A</b>  | transmembrane protein 200A                                                      | 1.33 | 3.0E-08 | 1.3E-06 |
| 3075778 | <b>HIPK2</b>     | homeodomain interacting protein kinase 2                                        | 1.32 | 3.8E-08 | 1.6E-06 |
| 2626167 | <b>PXK</b>       | PX domain containing serine/threonine kinase                                    | 1.32 | 8.7E-08 | 2.9E-06 |
| 2501204 | <b>IL1RN</b>     | interleukin 1 receptor antagonist                                               | 1.32 | 4.6E-07 | 9.4E-06 |
| 3801621 | <b>OSBPL1A</b>   | oxysterol binding protein-like 1A                                               | 1.32 | 1.6E-07 | 4.4E-06 |
| 2327817 | <b>PTPRU</b>     | protein tyrosine phosphatase, receptor type, U                                  | 1.31 | 8.2E-09 | 5.8E-07 |
| 3420316 | <b>HMGA2</b>     | high mobility group AT-hook 2                                                   | 1.30 | 2.3E-08 | 1.1E-06 |
| 3960930 | <b>CBX6</b>      | chromobox homolog 6                                                             | 1.29 | 9.6E-10 | 1.6E-07 |
| 3504226 | <b>CRYL1</b>     | crystallin, lambda 1                                                            | 1.29 | 4.2E-08 | 1.7E-06 |
| 2359377 | <b>LCE2A</b>     | late cornified envelope 2A                                                      | 1.29 | 7.1E-06 | 7.1E-05 |
| 2832459 | <b>PCDHB14</b>   | protocadherin beta 14                                                           | 1.29 | 9.1E-06 | 8.5E-05 |
| 3594031 | <b>TMOD2</b>     | tropomodulin 2 (neuronal)                                                       | 1.29 | 3.8E-06 | 4.4E-05 |
| 2731513 | <b>EREG</b>      | epiregulin                                                                      | 1.28 | 1.0E-06 | 1.7E-05 |
| 2946714 | <b>HIST1H2BK</b> | histone cluster 1, H2bk                                                         | 1.27 | 4.0E-07 | 8.4E-06 |
| 3043936 | <b>FKBP14</b>    | FK506 binding protein 14, 22 kDa                                                | 1.27 | 6.2E-06 | 6.4E-05 |
| 3151086 | <b>HAS2</b>      | hyaluronan synthase 2                                                           | 1.27 | 5.2E-05 | 3.3E-04 |
| 2915420 | <b>PRSS35</b>    | protease, serine, 35                                                            | 1.26 | 2.5E-06 | 3.2E-05 |
| 3595441 | <b>GCOM1</b>     | GRINL1A complex locus                                                           | 1.26 | 1.6E-06 | 2.4E-05 |
| 3300115 | <b>PPP1R3C</b>   | protein phosphatase 1, regulatory (inhibitor) subunit 3C                        | 1.26 | 5.0E-08 | 1.9E-06 |
| 3812074 | <b>DSEL</b>      | dermatan sulfate epimerase-like                                                 | 1.25 | 6.0E-08 | 2.2E-06 |
| 2890660 | <b>GFPT2</b>     | glutamine-fructose-6-phosphate transaminase 2                                   | 1.25 | 2.6E-07 | 6.2E-06 |
| 3260985 | <b>SFXN3</b>     | sideroflexin 3                                                                  | 1.24 | 5.5E-09 | 4.5E-07 |
| 3160175 | <b>VLDLR</b>     | very low density lipoprotein receptor                                           | 1.24 | 1.6E-07 | 4.3E-06 |
| 3129731 | <b>DUSP4</b>     | dual specificity phosphatase 4                                                  | 1.22 | 4.0E-08 | 1.7E-06 |
| 2671728 | <b>CDCP1</b>     | CUB domain containing protein 1                                                 | 1.22 | 1.5E-06 | 2.2E-05 |
| 3050462 | <b>GRB10</b>     | growth factor receptor-bound protein 10                                         | 1.22 | 9.0E-08 | 2.9E-06 |
| 3928590 | <b>KRTAP21-1</b> | keratin associated protein 21-1                                                 | 1.22 | 6.5E-04 | 2.4E-03 |
| 4018729 | <b>IL13RA2</b>   | interleukin 13 receptor, alpha 2                                                | 1.20 | 1.3E-06 | 2.0E-05 |
| 3399004 | <b>OPCML</b>     | opioid binding protein/cell adhesion molecule-like                              | 1.19 | 1.6E-07 | 4.3E-06 |
| 3061621 | <b>TFPI2</b>     | tissue factor pathway inhibitor 2                                               | 1.19 | 3.7E-05 | 2.6E-04 |
| 2385967 | <b>SLC35F3</b>   | solute carrier family 35, member F3                                             | 1.19 | 1.7E-08 | 9.3E-07 |
| 3936951 | <b>SEPT5</b>     | septin 5                                                                        | 1.19 | 2.2E-08 | 1.1E-06 |
| 3374402 | <b>LPXN</b>      | leupaxin                                                                        | 1.19 | 5.0E-08 | 1.9E-06 |
| 2554018 | <b>EFEMP1</b>    | EGF-containing fibulin-like extracellular matrix protein 1                      | 1.18 | 9.9E-08 | 3.1E-06 |
| 3638607 | <b>ANPEP</b>     | alanyl (membrane) aminopeptidase                                                | 1.18 | 7.8E-10 | 1.5E-07 |
| 3430086 | <b>TCP11L2</b>   | t-complex 11 (mouse)-like 2                                                     | 1.18 | 1.2E-06 | 1.9E-05 |
| 3095313 | <b>C8ORF4</b>    | chromosome 8 open reading frame 4                                               | 1.18 | 1.2E-04 | 6.4E-04 |
| 4002173 | <b>RPS6KA3</b>   | ribosomal protein S6 kinase, 90kDa, polypeptide 3                               | 1.18 | 3.9E-06 | 4.4E-05 |
| 2356115 | <b>TXNIP</b>     | thioredoxin interacting protein                                                 | 1.17 | 4.0E-08 | 1.7E-06 |
| 3882949 | <b>DYNLRB1</b>   | dynein, light chain, roadblock-type 1                                           | 1.16 | 6.1E-07 | 1.2E-05 |
| 3026216 | <b>CHRM2</b>     | cholinergic receptor, muscarinic 2                                              | 1.15 | 2.8E-03 | 7.6E-03 |
| 2837029 | <b>SGCD</b>      | sarcoglycan, delta (35kDa dystrophin-associated glycoprotein)                   | 1.14 | 4.8E-06 | 5.2E-05 |
| 3786868 | <b>SLC14A1</b>   | solute carrier family 14 (urea transporter), member 1 (Kidd blood group)        | 1.13 | 1.1E-05 | 9.8E-05 |
| 3797561 | <b>LAMA1</b>     | laminin, alpha 1                                                                | 1.13 | 2.7E-08 | 1.3E-06 |
| 3288518 | <b>C10ORF72</b>  | chromosome 10 open reading frame 72                                             | 1.13 | 4.5E-07 | 9.2E-06 |
| 3429566 | <b>CHST11</b>    | carbohydrate (chondroitin 4) sulfotransferase 11                                | 1.13 | 1.4E-08 | 8.2E-07 |
| 2991150 | <b>TSPAN13</b>   | tetraspanin 13                                                                  | 1.12 | 2.1E-07 | 5.3E-06 |
| 2594089 | <b>SATB2</b>     | SATB homeobox 2                                                                 | 1.12 | 6.0E-08 | 2.2E-06 |
| 3321150 | <b>ARNTL</b>     | aryl hydrocarbon receptor nuclear translocator-like                             | 1.12 | 7.9E-06 | 7.7E-05 |
| 2386747 | <b>GPR137B</b>   | G protein-coupled receptor 137B                                                 | 1.11 | 3.9E-07 | 8.3E-06 |
| 2502762 | <b>STEAP3</b>    | STEAP family member 3                                                           | 1.11 | 7.0E-07 | 1.3E-05 |
| 3756750 | <b>KRTAP4-12</b> | keratin associated protein 4-12                                                 | 1.11 | 1.1E-04 | 6.0E-04 |
| 3843156 | <b>ZNF460</b>    | zinc finger protein 460                                                         | 1.11 | 7.7E-06 | 7.6E-05 |
| 2835300 | <b>SLC26A2</b>   | solute carrier family 26 (sulfate transporter), member 2                        | 1.11 | 9.1E-06 | 8.5E-05 |
| 4009288 | <b>HSD17B10</b>  | hydroxysteroid (17-beta) dehydrogenase 10                                       | 1.10 | 5.5E-08 | 2.0E-06 |
| 3178147 | <b>CTSL1</b>     | cathepsin L1                                                                    | 1.10 | 3.0E-07 | 6.9E-06 |
| 3942062 | <b>NF2</b>       | neurofibromin 2 (merlin)                                                        | 1.10 | 4.5E-08 | 1.8E-06 |
| 3773241 | <b>TBC1D16</b>   | TBC1 domain family, member 16                                                   | 1.10 | 1.1E-07 | 3.4E-06 |
| 3977299 | <b>CLCN5</b>     | chloride channel 5                                                              | 1.10 | 5.2E-06 | 5.5E-05 |
| 3592755 | <b>SEMA6D</b>    | sema domain, transmembrane domain (TM), and cytoplasmic domain, (semaphorin) 6D | 1.10 | 1.0E-05 | 9.2E-05 |
| 2351294 | <b>KCNC4</b>     | potassium voltage-gated channel, Shaw-related subfamily, member 4               | 1.09 | 1.5E-07 | 4.2E-06 |
| 3140213 | <b>MSC</b>       | musculin                                                                        | 1.09 | 8.2E-07 | 1.4E-05 |
| 2775214 | <b>PRKG2</b>     | protein kinase, cGMP-dependent, type II                                         | 1.09 | 3.0E-07 | 6.9E-06 |
| 2816494 | <b>F2RL1</b>     | coagulation factor II (thrombin) receptor-like 1                                | 1.08 | 1.4E-08 | 8.2E-07 |
| 3608398 | <b>FURIN</b>     | furin (paired basic amino acid cleaving enzyme)                                 | 1.08 | 5.1E-09 | 4.2E-07 |
| 3240452 | <b>BAMBI</b>     | BMP and activin membrane-bound inhibitor homolog (Xenopus laevis)               | 1.07 | 8.7E-05 | 4.9E-04 |
| 2378068 | <b>G0S2</b>      | G0/G1switch 2                                                                   | 1.07 | 2.8E-06 | 3.5E-05 |

|         |                  |                                                                                           |      |         |         |
|---------|------------------|-------------------------------------------------------------------------------------------|------|---------|---------|
| 3075531 | <b>ZC3HAV1L</b>  | zinc finger CCCH-type, antiviral 1-like                                                   | 1.06 | 3.9E-06 | 4.4E-05 |
| 3145149 | <b>TP53INP1</b>  | tumor protein p53 inducible nuclear protein 1                                             | 1.06 | 2.6E-06 | 3.4E-05 |
| 3135567 | <b>LYPLA1</b>    | lysophospholipase I                                                                       | 1.06 | 1.2E-03 | 3.9E-03 |
| 3396593 | <b>FEZ1</b>      | fasciculation and elongation protein zeta 1 (zygin I)                                     | 1.06 | 3.9E-08 | 1.7E-06 |
| 2995254 | <b>C7ORF41</b>   | chromosome 7 open reading frame 41                                                        | 1.06 | 2.0E-06 | 2.8E-05 |
| 3460584 | <b>LLPH</b>      | LLP homolog, long-term synaptic facilitation (Aplysia)                                    | 1.06 | 2.8E-04 | 1.2E-03 |
| 3921933 | <b>BACE2</b>     | beta-site APP-cleaving enzyme 2                                                           | 1.06 | 2.6E-09 | 2.7E-07 |
| 2614120 | <b>RPL15</b>     | ribosomal protein L15                                                                     | 1.06 | 5.9E-06 | 6.2E-05 |
| 2740067 | <b>ANK2</b>      | ankyrin 2, neuronal                                                                       | 1.05 | 1.6E-07 | 4.3E-06 |
| 3457549 | <b>ANKRD52</b>   | ankyrin repeat domain 52                                                                  | 1.05 | 2.4E-06 | 3.2E-05 |
| 3664952 | <b>PDP2</b>      | pyruvate dehydrogenase phosphatase catalytic subunit 2                                    | 1.04 | 2.9E-07 | 6.7E-06 |
| 2816459 | <b>F2R</b>       | coagulation factor II (thrombin) receptor                                                 | 1.04 | 2.3E-08 | 1.1E-06 |
| 3741547 | <b>P2RX5</b>     | purinergic receptor P2X, ligand-gated ion channel, 5                                      | 1.04 | 2.9E-08 | 1.3E-06 |
| 3630736 | <b>ITGA11</b>    | integrin, alpha 11                                                                        | 1.04 | 3.7E-06 | 4.3E-05 |
| 3175971 | <b>PSAT1</b>     | phosphoserine aminotransferase 1                                                          | 1.03 | 3.3E-05 | 2.3E-04 |
| 4002148 | <b>EIF1AX</b>    | eukaryotic translation initiation factor 1A, X-linked                                     | 1.03 | 3.5E-05 | 2.4E-04 |
| 2477438 | <b>QPCT</b>      | glutamyl-peptide cyclotransferase                                                         | 1.02 | 1.4E-06 | 2.1E-05 |
| 2967276 | <b>POPDC3</b>    | popeye domain containing 3                                                                | 1.02 | 5.4E-06 | 5.7E-05 |
| 3392332 | <b>CADM1</b>     | cell adhesion molecule 1                                                                  | 1.02 | 1.9E-06 | 2.7E-05 |
| 3063463 | <b>CYP3A7</b>    | cytochrome P450, family 3, subfamily A, polypeptide 7                                     | 1.01 | 1.1E-06 | 1.8E-05 |
| 3820571 | <b>ATG4D</b>     | ATG4 autophagy related 4 homolog D (S. cerevisiae)                                        | 1.01 | 5.6E-07 | 1.1E-05 |
| 3920850 | <b>KCNJ15</b>    | potassium inwardly-rectifying channel, subfamily J, member 15                             | 1.01 | 8.0E-06 | 7.8E-05 |
| 2343418 | <b>PTGFR</b>     | prostaglandin F receptor (FP)                                                             | 1.01 | 2.6E-06 | 3.3E-05 |
| 2649723 | <b>MFSD1</b>     | major facilitator superfamily domain containing 1                                         | 1.00 | 4.6E-07 | 9.4E-06 |
| 3917305 | <b>BACH1</b>     | BTB and CNC homology 1, basic leucine zipper transcription factor 1                       | 1.00 | 2.2E-06 | 3.0E-05 |
| 3125001 | <b>LONRF1</b>    | LON peptidase N-terminal domain and ring finger 1                                         | 1.00 | 1.9E-05 | 1.5E-04 |
| 3721579 | <b>NKIRAS2</b>   | NFKB inhibitor interacting Ras-like 2                                                     | 0.99 | 5.9E-09 | 4.6E-07 |
| 3759105 | <b>FAM171A2</b>  | family with sequence similarity 171, member A2                                            | 0.99 | 1.0E-06 | 1.7E-05 |
| 2448382 | <b>PTGS2</b>     | prostaglandin-endoperoxide synthase 2 (prostaglandin G/H synthase and cyclooxygenase)     | 0.99 | 2.9E-05 | 2.1E-04 |
| 2791063 | <b>CTSO</b>      | cathepsin O                                                                               | 0.99 | 6.7E-06 | 6.7E-05 |
| 3134922 | <b>PCMTD1</b>    | protein-L-isoaspartate (D-aspartate) O-methyltransferase domain containing 1              | 0.99 | 2.4E-04 | 1.1E-03 |
| 2515627 | <b>ITGA6</b>     | integrin, alpha 6                                                                         | 0.98 | 7.6E-07 | 1.4E-05 |
| 2907568 | <b>KLHDC3</b>    | kelch domain containing 3                                                                 | 0.98 | 1.6E-06 | 2.4E-05 |
| 3984468 | <b>SRPX2</b>     | sushi-repeat-containing protein, X-linked 2                                               | 0.98 | 2.0E-06 | 2.8E-05 |
| 3252036 | <b>PLAU</b>      | plasminogen activator, urokinase                                                          | 0.98 | 8.0E-07 | 1.4E-05 |
| 2950629 | <b>TAPBP</b>     | TAP binding protein (tapasin)                                                             | 0.98 | 9.8E-09 | 6.5E-07 |
| 2372858 | <b>RGS2</b>      | regulator of G-protein signaling 2, 24kDa                                                 | 0.98 | 5.7E-04 | 2.2E-03 |
| 2731332 | <b>IL8</b>       | interleukin 8                                                                             | 0.98 | 6.8E-04 | 2.5E-03 |
| 2421753 | <b>GTF2B</b>     | general transcription factor IIB                                                          | 0.98 | 4.1E-05 | 2.7E-04 |
| 3127745 | <b>TNFRSF10D</b> | tumor necrosis factor receptor superfamily, member 10d, decoy with truncated death domain | 0.97 | 2.2E-07 | 5.5E-06 |
| 2832297 | <b>PCDHB2</b>    | protocadherin beta 2                                                                      | 0.97 | 5.5E-06 | 5.8E-05 |
| 2832403 | <b>PCDHB9</b>    | protocadherin beta 9                                                                      | 0.97 | 3.8E-06 | 4.3E-05 |
| 3599495 | <b>CORO2B</b>    | coronin, actin binding protein, 2B                                                        | 0.97 | 1.7E-07 | 4.5E-06 |
| 3740770 | <b>RTN4RL1</b>   | reticulon 4 receptor-like 1                                                               | 0.97 | 2.4E-03 | 6.8E-03 |
| 2352338 | <b>FAM19A3</b>   | family with sequence similarity 19 (chemokine (C-C motif)-like), member A3                | 0.97 | 2.9E-06 | 3.6E-05 |
| 3367231 | <b>BDNF</b>      | brain-derived neurotrophic factor                                                         | 0.96 | 1.0E-06 | 1.7E-05 |
| 3766960 | <b>SMURF2</b>    | SMAD specific E3 ubiquitin protein ligase 2                                               | 0.96 | 1.8E-08 | 9.9E-07 |
| 3362159 | <b>NRIP3</b>     | nuclear receptor interacting protein 3                                                    | 0.96 | 9.1E-07 | 1.6E-05 |
| 2686023 | <b>DCBLD2</b>    | discoidin, CUB and LCCL domain containing 2                                               | 0.95 | 1.3E-07 | 3.9E-06 |
| 3916527 | <b>JAM2</b>      | junctional adhesion molecule 2                                                            | 0.95 | 1.7E-06 | 2.5E-05 |
| 3886294 | <b>TOX2</b>      | TOX high mobility group box family member 2                                               | 0.95 | 2.0E-08 | 1.1E-06 |
| 3126191 | <b>PSD3</b>      | pleckstrin and Sec7 domain containing 3                                                   | 0.95 | 7.5E-06 | 7.3E-05 |
| 2665199 | <b>SATB1</b>     | SATB homeobox 1                                                                           | 0.94 | 1.8E-05 | 1.5E-04 |
| 3590239 | <b>DLL4</b>      | delta-like 4 (Drosophila)                                                                 | 0.94 | 2.9E-06 | 3.6E-05 |
| 3062738 | <b>OCM2</b>      | oncomodulin 2                                                                             | 0.94 | 3.0E-03 | 8.0E-03 |
| 3978760 | <b>MAGEH1</b>    | melanoma antigen family H, 1                                                              | 0.94 | 1.9E-06 | 2.7E-05 |
| 3756668 | <b>KRTAP3-1</b>  | keratin associated protein 3-1                                                            | 0.94 | 3.1E-06 | 3.8E-05 |
| 3650762 | <b>TMC7</b>      | transmembrane channel-like 7                                                              | 0.93 | 2.3E-02 | 4.1E-02 |
| 3260001 | <b>MARVELD1</b>  | MARVEL domain containing 1                                                                | 0.93 | 3.1E-09 | 3.1E-07 |
| 3443296 | <b>M6PR</b>      | mannose-6-phosphate receptor (cation dependent)                                           | 0.93 | 8.2E-09 | 5.8E-07 |
| 2465778 | <b>OR6F1</b>     | olfactory receptor, family 6, subfamily F, member 1                                       | 0.93 | 3.2E-04 | 1.4E-03 |
| 2832387 | <b>PCDHB8</b>    | protocadherin beta 8                                                                      | 0.93 | 4.7E-04 | 1.9E-03 |
| 2967249 | <b>BVES</b>      | blood vessel epicardial substance                                                         | 0.93 | 1.8E-05 | 1.4E-04 |
| 2832467 | <b>PCDHB18</b>   | protocadherin beta 18 pseudogene                                                          | 0.93 | 6.9E-04 | 2.5E-03 |
| 2353717 | <b>PTGFRN</b>    | prostaglandin F2 receptor negative regulator                                              | 0.92 | 3.3E-07 | 7.3E-06 |
| 3850501 | <b>LOC147727</b> | hypothetical LOC147727                                                                    | 0.92 | 1.4E-06 | 2.1E-05 |
| 3898355 | <b>FLRT3</b>     | fibronectin leucine rich transmembrane protein 3                                          | 0.92 | 1.7E-04 | 8.4E-04 |
| 2896177 | <b>JARID2</b>    | jumonji, AT rich interactive domain 2                                                     | 0.92 | 2.3E-06 | 3.1E-05 |
| 2461891 | <b>B3GALNT2</b>  | beta-1,3-N-acetylgalactosaminyltransferase 2                                              | 0.92 | 2.5E-06 | 3.3E-05 |
| 3464860 | <b>DUSP6</b>     | dual specificity phosphatase 6                                                            | 0.92 | 1.7E-07 | 4.6E-06 |

|         |                  |                                                                                        |      |         |         |
|---------|------------------|----------------------------------------------------------------------------------------|------|---------|---------|
| 3914050 | <b>STMN3</b>     | stathmin-like 3                                                                        | 0.92 | 1.1E-07 | 3.4E-06 |
| 3359121 | <b>IGF2</b>      | insulin-like growth factor 2 (somatomedin A)                                           | 0.91 | 2.0E-05 | 1.6E-04 |
| 3947227 | <b>SEPT3</b>     | septin 3                                                                               | 0.91 | 2.8E-06 | 3.6E-05 |
| 2499053 | <b>LIMS1</b>     | LIM and senescent cell antigen-like domains 1                                          | 0.91 | 2.5E-04 | 1.1E-03 |
| 3059464 | <b>SEMA3A</b>    | sema domain, immunoglobulin domain (Ig), short basic domain, secreted, (semaphorin) 3A | 0.91 | 6.3E-05 | 3.8E-04 |
| 3830277 | <b>USF2</b>      | upstream transcription factor 2, c-fos interacting                                     | 0.91 | 9.0E-08 | 2.9E-06 |
| 3048778 | <b>TMED4</b>     | transmembrane emp24 protein transport domain containing 4                              | 0.91 | 7.1E-08 | 2.5E-06 |
| 2349043 | <b>SLC30A7</b>   | solute carrier family 30 (zinc transporter), member 7                                  | 0.90 | 3.2E-06 | 3.9E-05 |
| 2434575 | <b>CTSS</b>      | cathepsin S                                                                            | 0.90 | 3.0E-04 | 1.3E-03 |
| 3801411 | <b>NPC1</b>      | Niemann-Pick disease, type C1                                                          | 0.90 | 4.0E-07 | 8.4E-06 |
| 3147286 | <b>RRM2B</b>     | ribonucleotide reductase M2 B (TP53 inducible)                                         | 0.90 | 6.9E-05 | 4.1E-04 |
| 3846316 | <b>PIP5K1C</b>   | phosphatidylinositol-4-phosphate 5-kinase, type I, gamma                               | 0.90 | 2.4E-08 | 1.2E-06 |
| 2568968 | <b>UXS1</b>      | UDP-glucuronate decarboxylase 1                                                        | 0.90 | 2.0E-05 | 1.6E-04 |
| 3449068 | <b>TMTC1</b>     | transmembrane and tetratricopeptide repeat containing 1                                | 0.89 | 6.9E-05 | 4.1E-04 |
| 3205633 | <b>MCART1</b>    | mitochondrial carrier triple repeat 1                                                  | 0.89 | 5.5E-03 | 1.3E-02 |
| 2344984 | <b>CLCA2</b>     | chloride channel accessory 2                                                           | 0.89 | 3.1E-06 | 3.8E-05 |
| 3246888 | <b>PRKG1</b>     | protein kinase, cGMP-dependent, type I                                                 | 0.89 | 2.5E-04 | 1.1E-03 |
| 3560617 | <b>SNX6</b>      | sorting nexin 6                                                                        | 0.88 | 2.0E-07 | 5.2E-06 |
| 3766651 | <b>ERN1</b>      | endoplasmic reticulum to nucleus signaling 1                                           | 0.88 | 2.4E-07 | 5.8E-06 |
| 3296046 | <b>KCNMA1</b>    | potassium large conductance calcium-activated channel, subfamily M, alpha member 1     | 0.88 | 1.3E-07 | 3.7E-06 |
| 2349402 | <b>AMY2B</b>     | amylase, alpha 2B (pancreatic)                                                         | 0.88 | 3.3E-03 | 8.7E-03 |
| 3756723 | <b>KRTAP2-4</b>  | keratin associated protein 2-4                                                         | 0.88 | 3.1E-07 | 7.0E-06 |
| 3023384 | <b>AHCYL2</b>    | adenosylhomocysteinase-like 2                                                          | 0.88 | 2.2E-06 | 2.9E-05 |
| 2879105 | <b>SPRY4</b>     | sprouty homolog 4 (Drosophila)                                                         | 0.88 | 3.0E-06 | 3.7E-05 |
| 2790062 | <b>TMEM154</b>   | transmembrane protein 154                                                              | 0.88 | 9.5E-05 | 5.2E-04 |
| 2537171 | <b>FAM150B</b>   | family with sequence similarity 150, member B                                          | 0.88 | 9.2E-08 | 3.0E-06 |
| 2726910 | <b>SPATA18</b>   | spermatogenesis associated 18 homolog (rat)                                            | 0.88 | 1.2E-06 | 1.9E-05 |
| 3410056 | <b>TSPAN11</b>   | tetraspanin 11                                                                         | 0.87 | 2.7E-03 | 7.3E-03 |
| 2417390 | <b>WLS</b>       | wntless homolog (Drosophila)                                                           | 0.87 | 5.7E-07 | 1.1E-05 |
| 3566949 | <b>C14ORF149</b> | chromosome 14 open reading frame 149                                                   | 0.87 | 1.5E-07 | 4.2E-06 |
| 2382467 | <b>CNIH3</b>     | cornichon homolog 3 (Drosophila)                                                       | 0.87 | 5.9E-06 | 6.1E-05 |
| 3389353 | <b>CASP1</b>     | caspase 1, apoptosis-related cysteine peptidase (interleukin 1, beta, convertase)      | 0.87 | 9.6E-04 | 3.2E-03 |
| 2734421 | <b>ARHGAP24</b>  | Rho GTPase activating protein 24                                                       | 0.87 | 3.3E-05 | 2.3E-04 |
| 3238962 | <b>KIAA1217</b>  | KIAA1217                                                                               | 0.87 | 1.9E-07 | 4.9E-06 |
| 2489545 | <b>HK2</b>       | hexokinase 2                                                                           | 0.87 | 1.7E-06 | 2.4E-05 |
| 3148463 | <b>ANGPT1</b>    | angiopoietin 1                                                                         | 0.87 | 1.4E-05 | 1.2E-04 |
| 2923939 | <b>SMPDL3A</b>   | sphingomyelin phosphodiesterase, acid-like 3A                                          | 0.87 | 2.3E-06 | 3.1E-05 |
| 2867836 | <b>GLRX</b>      | glutaredoxin (thioltransferase)                                                        | 0.87 | 1.7E-06 | 2.4E-05 |
| 3811459 | <b>KDSR</b>      | 3-ketodihydrospingosine reductase                                                      | 0.87 | 2.3E-07 | 5.6E-06 |
| 2832447 | <b>PCDH13</b>    | protocadherin beta 13 // protocadherin beta 13                                         | 0.86 | 2.3E-04 | 1.1E-03 |
| 2655113 | <b>KLHL24</b>    | kelch-like 24 (Drosophila)                                                             | 0.86 | 7.6E-05 | 4.4E-04 |
| 2405036 | <b>BSDC1</b>     | BSD domain containing 1                                                                | 0.86 | 7.9E-08 | 2.7E-06 |
| 3564790 | <b>ERO1L</b>     | ERO1-like (S. cerevisiae)                                                              | 0.86 | 5.4E-06 | 5.7E-05 |
| 3821159 | <b>LPPR2</b>     | lipid phosphate phosphatase-related protein type 2                                     | 0.86 | 2.4E-08 | 1.2E-06 |
| 3741456 | <b>TRPV1</b>     | transient receptor potential cation channel, subfamily V, member 1                     | 0.85 | 1.9E-03 | 5.7E-03 |
| 2727587 | <b>KIT</b>       | v-kit Hardy-Zuckerman 4 feline sarcoma viral oncogene homolog                          | 0.85 | 1.8E-05 | 1.4E-04 |
| 2834863 | <b>ABLIM3</b>    | actin binding LIM protein family, member 3                                             | 0.85 | 2.9E-07 | 6.6E-06 |
| 3814791 | <b>PARD6G</b>    | par-6 partitioning defective 6 homolog gamma (C. elegans)                              | 0.85 | 6.1E-05 | 3.7E-04 |
| 3347431 | <b>ELMOD1</b>    | ELMO/CED-12 domain containing 1                                                        | 0.85 | 4.4E-06 | 4.9E-05 |
| 3806211 | <b>PSTPIP2</b>   | proline-serine-threonine phosphatase interacting protein 2                             | 0.85 | 2.9E-06 | 3.6E-05 |
| 3174121 | <b>MAMDC2</b>    | MAM domain containing 2                                                                | 0.85 | 5.7E-06 | 5.9E-05 |
| 2960955 | <b>SLC17A5</b>   | solute carrier family 17 (anion/sugar transporter), member 5                           | 0.85 | 2.6E-06 | 3.4E-05 |
| 2964231 | <b>RRAGD</b>     | Ras-related GTP binding D                                                              | 0.85 | 2.2E-07 | 5.4E-06 |
| 3358742 | <b>TOLLIP</b>    | toll interacting protein                                                               | 0.85 | 6.6E-07 | 1.2E-05 |
| 4008427 | <b>NUDT11</b>    | nudix (nucleoside diphosphate linked moiety X)-type motif 11                           | 0.85 | 6.0E-04 | 2.3E-03 |
| 3260265 | <b>CNNM1</b>     | cyclin M1                                                                              | 0.84 | 1.7E-05 | 1.4E-04 |
| 3104260 | <b>PKIA</b>      | protein kinase (cAMP-dependent, catalytic) inhibitor alpha                             | 0.84 | 1.6E-07 | 4.3E-06 |
| 3389273 | <b>CASP4</b>     | caspase 4, apoptosis-related cysteine peptidase                                        | 0.84 | 1.7E-07 | 4.6E-06 |
| 3715512 | <b>TNFAIP1</b>   | tumor necrosis factor, alpha-induced protein 1 (endothelial)                           | 0.84 | 1.3E-07 | 3.8E-06 |
| 3671202 | <b>CDH13</b>     | cadherin 13, H-cadherin (heart)                                                        | 0.84 | 3.3E-07 | 7.3E-06 |
| 3141755 | <b>HEY1</b>      | hairly/enhancer-of-split related with YRPW motif 1                                     | 0.84 | 3.3E-07 | 7.3E-06 |
| 2359470 | <b>IVL</b>       | involucrin                                                                             | 0.83 | 3.3E-04 | 1.4E-03 |
| 3873629 | <b>SIRPA</b>     | signal-regulatory protein alpha                                                        | 0.83 | 5.1E-07 | 1.0E-05 |
| 2575949 | <b>TUBA3E</b>    | tubulin, alpha 3e                                                                      | 0.83 | 8.9E-03 | 1.9E-02 |
| 3625539 | <b>NEDD4</b>     | neural precursor cell expressed, developmentally down-regulated 4                      | 0.83 | 7.6E-05 | 4.4E-04 |
| 3186191 | <b>ATP6V1G1</b>  | ATPase, H+ transporting, lysosomal 13kDa, V1 subunit G1                                | 0.83 | 6.4E-08 | 2.3E-06 |
| 2973232 | <b>C6ORF174</b>  | chromosome 6 open reading frame 174                                                    | 0.83 | 9.3E-05 | 5.1E-04 |
| 3262509 | <b>GSTO1</b>     | glutathione S-transferase omega 1                                                      | 0.83 | 1.9E-06 | 2.7E-05 |
| 3442854 | <b>SLC2A3</b>    | solute carrier family 2 (facilitated glucose transporter), member 3                    | 0.82 | 1.5E-07 | 4.2E-06 |
| 2706791 | <b>ZMAT3</b>     | zinc finger, matrin-type 3                                                             | 0.82 | 1.2E-05 | 1.1E-04 |
| 3239380 | <b>THNSL1</b>    | threonine synthase-like 1 (S. cerevisiae)                                              | 0.82 | 4.2E-04 | 1.7E-03 |

|         |                     |                                                                                                             |      |         |         |
|---------|---------------------|-------------------------------------------------------------------------------------------------------------|------|---------|---------|
| 2979246 | <b>RAET1L</b>       | retinoic acid early transcript 1L                                                                           | 0.82 | 2.1E-02 | 3.8E-02 |
| 3892873 | <b>NTSR1</b>        | neurotensin receptor 1 (high affinity)                                                                      | 0.82 | 3.9E-06 | 4.4E-05 |
| 3355733 | <b>FLI1</b>         | Friend leukemia virus integration 1                                                                         | 0.82 | 2.1E-07 | 5.4E-06 |
| 3268274 | <b>PLEKHA1</b>      | pleckstrin homology domain containing, family A (phosphoinositide binding specific) member 1                | 0.82 | 1.1E-04 | 6.1E-04 |
| 2739755 | <b>AP1AR</b>        | adaptor-related protein complex 1 associated regulatory protein                                             | 0.82 | 1.7E-04 | 8.2E-04 |
| 3894601 | <b>FKBP1A</b>       | FK506 binding protein 1A, 12kDa                                                                             | 0.81 | 1.6E-05 | 1.3E-04 |
| 3042881 | <b>HOXA7</b>        | homeobox A7                                                                                                 | 0.81 | 2.6E-05 | 1.9E-04 |
| 2476116 | <b>SLC30A6</b>      | solute carrier family 30 (zinc transporter), member 6                                                       | 0.81 | 5.4E-05 | 3.4E-04 |
| 2414366 | <b>PPAP2B</b>       | phosphatidic acid phosphatase type 2B                                                                       | 0.80 | 7.6E-08 | 2.6E-06 |
| 3964154 | <b>CERK</b>         | ceramide kinase                                                                                             | 0.80 | 1.5E-06 | 2.2E-05 |
| 2317434 | <b>TPRG1L</b>       | tumor protein p63 regulated 1-like                                                                          | 0.80 | 7.7E-08 | 2.7E-06 |
| 3828949 | <b>DPY19L3</b>      | dpy-19-like 3 (C. elegans)                                                                                  | 0.80 | 9.2E-05 | 5.1E-04 |
| 3981959 | <b>SLC16A2</b>      | solute carrier family 16, member 2 (monocarboxylic acid transporter 8)                                      | 0.80 | 3.0E-08 | 1.3E-06 |
| 3688079 | <b>NCRNA00095</b>   | non-protein coding RNA 95                                                                                   | 0.80 | 2.4E-03 | 6.7E-03 |
| 3601051 | <b>NEO1</b>         | neogenin 1                                                                                                  | 0.80 | 3.2E-06 | 3.9E-05 |
| 3771675 | <b>ST6GALNAC2</b>   | ST6 (alpha-N-acetyl-neuraminy-2,3-beta-galactosyl-1,3)-N-acetylglactosaminide alpha-2,6-sialyltransferase 2 | 0.80 | 6.4E-08 | 2.3E-06 |
| 2841491 | <b>C5ORF41</b>      | chromosome 5 open reading frame 41                                                                          | 0.80 | 1.1E-03 | 3.6E-03 |
| 3851072 | <b>ACP5</b>         | acid phosphatase 5, tartrate resistant                                                                      | 0.79 | 3.2E-04 | 1.4E-03 |
| 3147173 | <b>NCALD</b>        | neurocalcin delta                                                                                           | 0.79 | 1.3E-06 | 2.0E-05 |
| 3867443 | <b>HSD17B14</b>     | hydroxysteroid (17-beta) dehydrogenase 14                                                                   | 0.79 | 2.1E-05 | 1.6E-04 |
| 2394817 | <b>KLHL21</b>       | kelch-like 21 (Drosophila)                                                                                  | 0.79 | 3.5E-06 | 4.2E-05 |
| 3842755 | <b>LOC100128252</b> | hypothetical LOC100128252                                                                                   | 0.79 | 3.8E-05 | 2.6E-04 |
| 2832392 | <b>PCDHB16</b>      | protocadherin beta 16                                                                                       | 0.79 | 6.8E-05 | 4.0E-04 |
| 3728571 | <b>OR4D1</b>        | olfactory receptor, family 4, subfamily D, member 1                                                         | 0.79 | 5.7E-03 | 1.3E-02 |
| 2921296 | <b>AMD1</b>         | adenosylmethionine decarboxylase 1                                                                          | 0.78 | 3.4E-06 | 4.0E-05 |
| 3218528 | <b>ABCA1</b>        | ATP-binding cassette, sub-family A (ABC1), member 1                                                         | 0.78 | 3.1E-04 | 1.3E-03 |
| 3738629 | <b>SLC16A3</b>      | solute carrier family 16, member 3 (monocarboxylic acid transporter 4)                                      | 0.78 | 2.4E-08 | 1.2E-06 |
| 3466826 | <b>CDK17</b>        | cyclin-dependent kinase 17                                                                                  | 0.78 | 8.3E-06 | 8.0E-05 |
| 3706439 | <b>RAP1GAP2</b>     | RAP1 GTPase activating protein 2                                                                            | 0.78 | 1.2E-05 | 1.0E-04 |
| 2777714 | <b>SNCA</b>         | synuclein, alpha (non A4 component of amyloid precursor)                                                    | 0.78 | 7.3E-08 | 2.6E-06 |
| 2902348 | <b>MICB</b>         | MHC class I polypeptide-related sequence B                                                                  | 0.78 | 2.6E-06 | 3.3E-05 |
| 3341539 | <b>KCTD21</b>       | potassium channel tetramerisation domain containing 21                                                      | 0.78 | 7.9E-04 | 2.8E-03 |
| 3536706 | <b>LGALS3</b>       | lectin, galactoside-binding, soluble, 3                                                                     | 0.78 | 1.4E-07 | 3.9E-06 |
| 3222170 | <b>TNC</b>          | tenascin C                                                                                                  | 0.78 | 8.3E-07 | 1.5E-05 |
| 2388525 | <b>SDCCAG8</b>      | serologically defined colon cancer antigen 8                                                                | 0.77 | 6.1E-04 | 2.3E-03 |
| 2319340 | <b>SLC25A33</b>     | solute carrier family 25, member 33                                                                         | 0.77 | 2.4E-03 | 6.8E-03 |
| 3548929 | <b>RIN3</b>         | Ras and Rab interactor 3                                                                                    | 0.77 | 8.4E-08 | 2.8E-06 |
| 3972025 | <b>PDK3</b>         | pyruvate dehydrogenase kinase, isozyme 3                                                                    | 0.77 | 1.1E-05 | 9.7E-05 |
| 2912980 | <b>OGFRL1</b>       | opioid growth factor receptor-like 1                                                                        | 0.77 | 1.7E-04 | 8.4E-04 |
| 3807474 | <b>C18ORF32</b>     | chromosome 18 open reading frame 32                                                                         | 0.77 | 1.8E-05 | 1.5E-04 |
| 2823551 | <b>MAN2A1</b>       | mannosidase, alpha, class 2A, member 1                                                                      | 0.77 | 4.2E-04 | 1.7E-03 |
| 3858285 | <b>TSHZ3</b>        | teashirt zinc finger homeobox 3                                                                             | 0.77 | 3.6E-04 | 1.5E-03 |
| 3631214 | <b>TLE3</b>         | transducin-like enhancer of split 3 (E(sp1) homolog, Drosophila)                                            | 0.77 | 7.5E-07 | 1.4E-05 |
| 3895891 | <b>ADRA1D</b>       | adrenergic, alpha-1D-, receptor                                                                             | 0.76 | 8.7E-08 | 2.9E-06 |
| 3651955 | <b>METTL9</b>       | methyltransferase like 9                                                                                    | 0.76 | 1.3E-07 | 3.8E-06 |
| 2545953 | <b>FNDC4</b>        | fibronectin type III domain containing 4                                                                    | 0.76 | 2.2E-08 | 1.1E-06 |
| 3870104 | <b>ZNF415</b>       | zinc finger protein 415                                                                                     | 0.76 | 9.4E-05 | 5.2E-04 |
| 2969886 | <b>FYN</b>          | FYN oncogene related to SRC, FGR, YES                                                                       | 0.76 | 4.5E-05 | 2.9E-04 |
| 3575567 | <b>FOXN3</b>        | forkhead box N3                                                                                             | 0.76 | 3.4E-06 | 4.0E-05 |
| 3840164 | <b>ZNF610</b>       | zinc finger protein 610                                                                                     | 0.76 | 2.6E-06 | 3.3E-05 |
| 3275042 | <b>ASB13</b>        | ankyrin repeat and SOCS box-containing 13                                                                   | 0.76 | 4.5E-07 | 9.2E-06 |
| 2864849 | <b>SSBP2</b>        | single-stranded DNA binding protein 2                                                                       | 0.76 | 9.9E-07 | 1.7E-05 |
| 2563654 | <b>EIF2AK3</b>      | eukaryotic translation initiation factor 2-alpha kinase 3                                                   | 0.75 | 7.9E-05 | 4.5E-04 |
| 3345427 | <b>ENDOD1</b>       | endonuclease domain containing 1                                                                            | 0.75 | 8.1E-07 | 1.4E-05 |
| 3151970 | <b>MTSS1</b>        | metastasis suppressor 1                                                                                     | 0.75 | 1.5E-06 | 2.2E-05 |
| 3840224 | <b>ZNF528</b>       | zinc finger protein 528                                                                                     | 0.75 | 1.2E-04 | 6.2E-04 |
| 3968512 | <b>CLCN4</b>        | chloride channel 4                                                                                          | 0.75 | 2.1E-06 | 2.9E-05 |
| 2786732 | <b>MAML3</b>        | mastermind-like 3 (Drosophila)                                                                              | 0.75 | 1.3E-05 | 1.2E-04 |
| 3829857 | <b>ZNF302</b>       | zinc finger protein 302                                                                                     | 0.75 | 5.7E-04 | 2.2E-03 |
| 2493992 | <b>KCNIP3</b>       | Kv channel interacting protein 3, calsenilin                                                                | 0.75 | 7.6E-08 | 2.6E-06 |
| 2832310 | <b>PCDHB3</b>       | protocadherin beta 3                                                                                        | 0.75 | 9.9E-03 | 2.1E-02 |
| 2660029 | <b>LMLN</b>         | leishmanolysin-like (metallopeptidase M8 family)                                                            | 0.75 | 1.6E-04 | 7.7E-04 |
| 3410384 | <b>C12ORF35</b>     | chromosome 12 open reading frame 35                                                                         | 0.75 | 3.4E-04 | 1.4E-03 |
| 2372924 | <b>TROVE2</b>       | TROVE domain family, member 2                                                                               | 0.74 | 7.5E-03 | 1.7E-02 |
| 3752709 | <b>MYO1D</b>        | myosin ID                                                                                                   | 0.74 | 2.5E-06 | 3.3E-05 |
| 3422855 | <b>GLIPR1</b>       | GLI pathogenesis-related 1                                                                                  | 0.74 | 1.7E-07 | 4.5E-06 |
| 2362394 | <b>IFI16</b>        | interferon, gamma-inducible protein 16                                                                      | 0.74 | 6.1E-05 | 3.7E-04 |
| 3218067 | <b>MRPL50</b>       | mitochondrial ribosomal protein L50                                                                         | 0.74 | 1.7E-05 | 1.4E-04 |
| 3405748 | <b>EMP1</b>         | epithelial membrane protein 1                                                                               | 0.74 | 6.1E-07 | 1.2E-05 |

|         |                 |                                                                                                                                             |      |         |         |
|---------|-----------------|---------------------------------------------------------------------------------------------------------------------------------------------|------|---------|---------|
| 2847967 | <b>SEMA5A</b>   | sema domain, seven thrombospondin repeats (type 1 and type 1-like), transmembrane domain (TM) and short cytoplasmic domain, (semaphorin) 5A | 0.74 | 5.5E-05 | 3.4E-04 |
| 3922100 | <b>MX1</b>      | myxovirus (influenza virus) resistance 1, interferon-inducible protein p78 (mouse)                                                          | 0.74 | 6.0E-04 | 2.3E-03 |
| 3654699 | <b>NUPR1</b>    | nuclear protein, transcriptional regulator, 1                                                                                               | 0.74 | 5.4E-06 | 5.7E-05 |
| 3784208 | <b>DTNA</b>     | dystrobrevin, alpha                                                                                                                         | 0.73 | 1.2E-06 | 1.9E-05 |
| 3385951 | <b>NOX4</b>     | NADPH oxidase 4                                                                                                                             | 0.73 | 5.8E-06 | 6.0E-05 |
| 3076076 | <b>SLC37A3</b>  | solute carrier family 37 (glycerol-3-phosphate transporter), member 3                                                                       | 0.73 | 1.4E-05 | 1.2E-04 |
| 2714644 | <b>C4ORF42</b>  | chromosome 4 open reading frame 42                                                                                                          | 0.73 | 5.3E-05 | 3.4E-04 |
| 2725332 | <b>TMEM33</b>   | transmembrane protein 33                                                                                                                    | 0.73 | 1.3E-05 | 1.1E-04 |
| 3852880 | <b>EMR2</b>     | egf-like module containing, mucin-like, hormone receptor-like 2                                                                             | 0.73 | 4.9E-07 | 9.8E-06 |
| 2443120 | <b>DPT</b>      | dermatopontin                                                                                                                               | 0.73 | 2.0E-05 | 1.6E-04 |
| 3802129 | <b>SS18</b>     | synovial sarcoma translocation, chromosome 18                                                                                               | 0.73 | 1.2E-04 | 6.5E-04 |
| 3421300 | <b>MDM2</b>     | Mdm2 p53 binding protein homolog (mouse)                                                                                                    | 0.73 | 2.0E-05 | 1.6E-04 |
| 3148582 | <b>EIF3E</b>    | eukaryotic translation initiation factor 3, subunit E                                                                                       | 0.72 | 6.3E-04 | 2.4E-03 |
| 3329793 | <b>SLC39A13</b> | solute carrier family 39 (zinc transporter), member 13                                                                                      | 0.72 | 3.9E-07 | 8.3E-06 |
| 2856995 | <b>ESM1</b>     | endothelial cell-specific molecule 1                                                                                                        | 0.72 | 1.0E-05 | 9.4E-05 |
| 3843275 | <b>ZNF419</b>   | zinc finger protein 419                                                                                                                     | 0.72 | 7.0E-04 | 2.5E-03 |
| 3660213 | <b>CYLD</b>     | cylindromatosis (turban tumor syndrome)                                                                                                     | 0.72 | 8.1E-06 | 7.8E-05 |
| 2626802 | <b>PTPRG</b>    | protein tyrosine phosphatase, receptor type, G                                                                                              | 0.72 | 6.1E-05 | 3.7E-04 |
| 2504328 | <b>GYPC</b>     | glycophorin C (Gerbich blood group)                                                                                                         | 0.72 | 1.4E-07 | 3.9E-06 |
| 2327391 | <b>SESN2</b>    | sestrin 2                                                                                                                                   | 0.72 | 3.7E-07 | 8.0E-06 |
| 2470165 | <b>TRIB2</b>    | tribbles homolog 2 (Drosophila)                                                                                                             | 0.72 | 9.5E-07 | 1.6E-05 |
| 2331903 | <b>ZNF643</b>   | zinc finger protein 643                                                                                                                     | 0.71 | 2.9E-03 | 7.7E-03 |
| 2378019 | <b>CAMK1G</b>   | calcium/calmodulin-dependent protein kinase IG                                                                                              | 0.71 | 2.1E-07 | 5.3E-06 |
| 3990727 | <b>RAB33A</b>   | RAB33A, member RAS oncogene family                                                                                                          | 0.71 | 7.0E-05 | 4.1E-04 |
| 3806459 | <b>ST8SIA5</b>  | ST8 alpha-N-acetyl-neuraminide alpha-2,8-sialyltransferase 5                                                                                | 0.71 | 4.5E-05 | 2.9E-04 |
| 3674199 | <b>CPNE7</b>    | copine VII                                                                                                                                  | 0.71 | 8.9E-07 | 1.5E-05 |
| 2637112 | <b>GAP43</b>    | growth associated protein 43                                                                                                                | 0.71 | 6.7E-06 | 6.8E-05 |
| 2371346 | <b>RGL1</b>     | ral guanine nucleotide dissociation stimulator-like 1                                                                                       | 0.71 | 9.0E-06 | 8.5E-05 |
| 3901041 | <b>THBD</b>     | thrombomodulin                                                                                                                              | 0.71 | 7.6E-07 | 1.4E-05 |
| 2832423 | <b>PCDHB10</b>  | protocadherin beta 10                                                                                                                       | 0.71 | 8.8E-06 | 8.3E-05 |
| 2887164 | <b>SH3PXD2B</b> | SH3 and PX domains 2B                                                                                                                       | 0.71 | 2.0E-05 | 1.6E-04 |
| 3940099 | <b>ADORA2A</b>  | adenosine A2a receptor                                                                                                                      | 0.71 | 2.8E-05 | 2.1E-04 |
| 3395464 | <b>ASAM</b>     | adipocyte-specific adhesion molecule                                                                                                        | 0.71 | 1.3E-06 | 2.0E-05 |
| 3562003 | <b>TRAPPC6B</b> | trafficking protein particle complex 6B                                                                                                     | 0.71 | 3.1E-04 | 1.3E-03 |
| 3665949 | <b>PSKH1</b>    | protein serine kinase H1                                                                                                                    | 0.71 | 1.1E-06 | 1.8E-05 |
| 3142217 | <b>PAG1</b>     | phosphoprotein associated with glycosphingolipid microdomains 1                                                                             | 0.71 | 3.1E-05 | 2.2E-04 |
| 3512874 | <b>LCP1</b>     | lymphocyte cytosolic protein 1 (L-plastin)                                                                                                  | 0.71 | 4.5E-06 | 4.9E-05 |
| 3860450 | <b>ZNF566</b>   | zinc finger protein 566                                                                                                                     | 0.71 | 2.1E-04 | 9.8E-04 |
| 3227482 | <b>FIBCD1</b>   | fibrinogen C domain containing 1                                                                                                            | 0.71 | 1.4E-06 | 2.1E-05 |
| 3782166 | <b>IMPACT</b>   | Impact homolog (mouse)                                                                                                                      | 0.71 | 6.2E-04 | 2.3E-03 |
| 3106243 | <b>RIPK2</b>    | receptor-interacting serine-threonine kinase 2                                                                                              | 0.70 | 6.9E-05 | 4.1E-04 |
| 2515276 | <b>DYNC1I2</b>  | dynein, cytoplasmic 1, intermediate chain 2                                                                                                 | 0.70 | 2.4E-02 | 4.1E-02 |
| 3419849 | <b>TBK1</b>     | TANK-binding kinase 1                                                                                                                       | 0.70 | 1.9E-03 | 5.7E-03 |
| 3788976 | <b>RAB27B</b>   | RAB27B, member RAS oncogene family                                                                                                          | 0.70 | 3.5E-04 | 1.5E-03 |
| 3189932 | <b>STXBP1</b>   | syntaxin binding protein 1                                                                                                                  | 0.70 | 3.3E-08 | 1.5E-06 |
| 3569200 | <b>ATP6V1D</b>  | ATPase, H+ transporting, lysosomal 34kDa, V1 subunit D                                                                                      | 0.70 | 1.1E-04 | 6.0E-04 |
| 3235516 | <b>CAMK1D</b>   | calcium/calmodulin-dependent protein kinase ID                                                                                              | 0.70 | 5.5E-06 | 5.8E-05 |
| 3011838 | <b>STEAP1</b>   | six transmembrane epithelial antigen of the prostate 1                                                                                      | 0.70 | 8.2E-05 | 4.7E-04 |
| 3326400 | <b>CAT</b>      | catalase                                                                                                                                    | 0.70 | 4.1E-07 | 8.5E-06 |
| 3991889 | <b>FAM127A</b>  | family with sequence similarity 127, member A                                                                                               | 0.70 | 1.3E-06 | 2.0E-05 |
| 3875423 | <b>BMP2</b>     | bone morphogenetic protein 2                                                                                                                | 0.70 | 7.0E-06 | 7.0E-05 |
| 2835848 | <b>SLC36A1</b>  | solute carrier family 36 (proton/amino acid symporter), member 1                                                                            | 0.70 | 1.1E-06 | 1.7E-05 |
| 3592401 | <b>C15ORF48</b> | chromosome 15 open reading frame 48                                                                                                         | 0.70 | 2.6E-04 | 1.2E-03 |
| 3968122 | <b>TBL1X</b>    | transducin (beta)-like 1X-linked                                                                                                            | 0.70 | 4.1E-06 | 4.6E-05 |
| 3718555 | <b>SLFN5</b>    | schlafen family member 5                                                                                                                    | 0.70 | 2.5E-05 | 1.8E-04 |
| 2577028 | <b>NCKAP5</b>   | NCK-associated protein 5                                                                                                                    | 0.70 | 3.9E-04 | 1.6E-03 |
| 2487082 | <b>ANTXR1</b>   | anthrax toxin receptor 1                                                                                                                    | 0.70 | 6.4E-06 | 6.5E-05 |
| 2960010 | <b>LMBRD1</b>   | LMBR1 domain containing 1                                                                                                                   | 0.69 | 2.4E-04 | 1.1E-03 |
| 3225855 | <b>ANGPTL2</b>  | angiopoietin-like 2                                                                                                                         | 0.69 | 3.4E-06 | 4.1E-05 |
| 3204987 | <b>OR13J1</b>   | olfactory receptor, family 13, subfamily J, member 1                                                                                        | 0.69 | 2.1E-03 | 6.1E-03 |
| 3759849 | <b>PLEKHM1</b>  | pleckstrin homology domain containing, family M (with RUN domain) member 1                                                                  | 0.69 | 6.6E-07 | 1.2E-05 |
| 2732391 | <b>CCNG2</b>    | cyclin G2                                                                                                                                   | 0.69 | 2.5E-06 | 3.3E-05 |
| 3469180 | <b>SLC41A2</b>  | solute carrier family 41, member 2                                                                                                          | 0.69 | 8.0E-04 | 2.8E-03 |
| 3528864 | <b>MMP14</b>    | matrix metalloproteinase 14 (membrane-inserted)                                                                                             | 0.69 | 3.3E-07 | 7.3E-06 |
| 2331158 | <b>AKIRIN1</b>  | akirin 1                                                                                                                                    | 0.69 | 1.3E-05 | 1.2E-04 |
| 3147726 | <b>SLC25A32</b> | solute carrier family 25, member 32                                                                                                         | 0.69 | 1.7E-05 | 1.4E-04 |
| 3591963 | <b>EIF3J</b>    | eukaryotic translation initiation factor 3, subunit J                                                                                       | 0.68 | 1.3E-04 | 6.6E-04 |
| 3839057 | <b>TBC1D17</b>  | TBC1 domain family, member 17                                                                                                               | 0.68 | 2.9E-07 | 6.7E-06 |
| 3049292 | <b>IGFBP3</b>   | insulin-like growth factor binding protein 3                                                                                                | 0.68 | 1.3E-05 | 1.2E-04 |

|         |                  |                                                                          |      |         |         |
|---------|------------------|--------------------------------------------------------------------------|------|---------|---------|
| 3984907 | <b>ARMCX1</b>    | armadillo repeat containing, X-linked 1                                  | 0.68 | 6.2E-06 | 6.4E-05 |
| 3403414 | <b>DPPA3</b>     | developmental pluripotency associated 3                                  | 0.68 | 1.2E-03 | 3.8E-03 |
| 2748061 | <b>TRIM2</b>     | tripartite motif-containing 2                                            | 0.68 | 9.8E-04 | 3.3E-03 |
| 3778504 | <b>RAB31</b>     | RAB31, member RAS oncogene family                                        | 0.68 | 1.6E-06 | 2.3E-05 |
| 3261165 | <b>BTRC</b>      | beta-transducin repeat containing                                        | 0.68 | 4.1E-06 | 4.6E-05 |
| 3711262 | <b>HS3ST3B1</b>  | heparan sulfate (glucosamine) 3-O-sulfotransferase 3B1                   | 0.68 | 1.2E-04 | 6.2E-04 |
| 3567187 | <b>DHRS7</b>     | dehydrogenase/reductase (SDR family) member 7                            | 0.68 | 1.8E-05 | 1.4E-04 |
| 2425400 | <b>EXTL2</b>     | exostoses (multiple)-like 2                                              | 0.68 | 3.2E-04 | 1.4E-03 |
| 4023467 | <b>ARHGEF6</b>   | Rac/Cdc42 guanine nucleotide exchange factor (GEF) 6                     | 0.68 | 3.6E-05 | 2.5E-04 |
| 2780099 | <b>NHEDC2</b>    | Na <sup>+</sup> /H <sup>+</sup> exchanger domain containing 2            | 0.68 | 1.0E-05 | 9.2E-05 |
| 3661152 | <b>FTO</b>       | fat mass and obesity associated                                          | 0.68 | 2.0E-07 | 5.1E-06 |
| 3989089 | <b>ZBTB33</b>    | zinc finger and BTB domain containing 33                                 | 0.68 | 1.2E-03 | 3.8E-03 |
| 3353640 | <b>GRAMD1B</b>   | GRAM domain containing 1B                                                | 0.67 | 1.1E-05 | 9.7E-05 |
| 2532272 | <b>ALPP</b>      | alkaline phosphatase, placental                                          | 0.67 | 1.3E-02 | 2.6E-02 |
| 3690154 | <b>NETO2</b>     | neuropilin (NRP) and tolloid (TLL)-like 2                                | 0.67 | 3.0E-05 | 2.1E-04 |
| 3917204 | <b>C21ORF7</b>   | chromosome 21 open reading frame 7                                       | 0.67 | 6.9E-07 | 1.3E-05 |
| 4017381 | <b>TSC22D3</b>   | TSC22 domain family, member 3                                            | 0.67 | 8.9E-06 | 8.4E-05 |
| 3551485 | <b>EML1</b>      | echinoderm microtubule associated protein like 1                         | 0.67 | 2.8E-05 | 2.1E-04 |
| 3115504 | <b>MYC</b>       | v-myc myelocytomatosis viral oncogene homolog (avian)                    | 0.67 | 5.9E-07 | 1.1E-05 |
| 3250990 | <b>UNC5B</b>     | unc-5 homolog B (C. elegans)                                             | 0.67 | 1.3E-05 | 1.1E-04 |
| 2777447 | <b>NAP1L5</b>    | nucleosome assembly protein 1-like 5                                     | 0.67 | 1.0E-04 | 5.6E-04 |
| 3645816 | <b>ZNF75A</b>    | zinc finger protein 75a                                                  | 0.67 | 4.8E-04 | 1.9E-03 |
| 2988726 | <b>FSCN1</b>     | fascin homolog 1, actin-bundling protein (Strongylocentrotus purpuratus) | 0.67 | 8.7E-07 | 1.5E-05 |
| 3652271 | <b>C16ORF52</b>  | chromosome 16 open reading frame 52                                      | 0.67 | 2.9E-05 | 2.1E-04 |
| 3326067 | <b>C11ORF41</b>  | chromosome 11 open reading frame 41                                      | 0.67 | 1.0E-03 | 3.3E-03 |
| 3815045 | <b>HCN2</b>      | hyperpolarization activated cyclic nucleotide-gated potassium channel 2  | 0.67 | 4.1E-05 | 2.7E-04 |
| 3890109 | <b>C20ORF108</b> | chromosome 20 open reading frame 108                                     | 0.66 | 2.0E-05 | 1.6E-04 |
| 3212008 | <b>FRMD3</b>     | FERM domain containing 3                                                 | 0.66 | 3.0E-06 | 3.7E-05 |
| 3418492 | <b>TSPAN31</b>   | tetraspanin 31                                                           | 0.66 | 5.8E-07 | 1.1E-05 |
| 2968652 | <b>SESN1</b>     | sestrin 1                                                                | 0.66 | 4.1E-04 | 1.7E-03 |
| 2992814 | <b>GNMB</b>      | glycoprotein (transmembrane) nmb                                         | 0.66 | 1.0E-06 | 1.7E-05 |
| 3998632 | <b>PNPLA4</b>    | patatin-like phospholipase domain containing 4                           | 0.66 | 4.5E-05 | 2.9E-04 |
| 3448152 | <b>ITPR2</b>     | inositol 1,4,5-triphosphate receptor, type 2                             | 0.66 | 1.6E-03 | 4.7E-03 |
| 3928538 | <b>KRTAP19-5</b> | keratin associated protein 19-5                                          | 0.66 | 1.6E-02 | 3.0E-02 |
| 3462816 | <b>PHLDA1</b>    | pleckstrin homology-like domain, family A, member 1                      | 0.66 | 6.7E-08 | 2.4E-06 |
| 3887635 | <b>NCOA3</b>     | nuclear receptor coactivator 3                                           | 0.66 | 5.0E-05 | 3.2E-04 |
| 3061651 | <b>BET1</b>      | blocked early in transport 1 homolog (S. cerevisiae)                     | 0.66 | 2.8E-04 | 1.2E-03 |
| 3627422 | <b>RORA</b>      | RAR-related orphan receptor A                                            | 0.66 | 8.3E-07 | 1.5E-05 |
| 3419471 | <b>RPL14</b>     | ribosomal protein L14                                                    | 0.66 | 2.6E-05 | 1.9E-04 |
| 2802696 | <b>FAM105A</b>   | family with sequence similarity 105, member A                            | 0.66 | 8.9E-04 | 3.0E-03 |
| 3283920 | <b>ARHGAP12</b>  | Rho GTPase activating protein 12                                         | 0.66 | 2.2E-03 | 6.2E-03 |
| 3911814 | <b>SLMO2</b>     | slowmo homolog 2 (Drosophila)                                            | 0.66 | 4.4E-05 | 2.9E-04 |
| 3807487 | <b>RPL17</b>     | ribosomal protein L17                                                    | 0.65 | 9.6E-05 | 5.3E-04 |
| 2972310 | <b>SERINC1</b>   | serine incorporator 1                                                    | 0.65 | 1.3E-03 | 4.0E-03 |
| 3819200 | <b>EVI5L</b>     | ecotropic viral integration site 5-like                                  | 0.65 | 4.0E-07 | 8.4E-06 |
| 3565739 | <b>ATG14</b>     | ATG14 autophagy related 14 homolog (S. cerevisiae)                       | 0.65 | 7.6E-05 | 4.4E-04 |
| 3192062 | <b>BAT2L1</b>    | HLA-B associated transcript 2-like 1                                     | 0.65 | 4.0E-05 | 2.7E-04 |
| 3250699 | <b>EIF4EBP2</b>  | eukaryotic translation initiation factor 4E binding protein 2            | 0.65 | 3.6E-07 | 7.8E-06 |
| 2913277 | <b>KCNQ5</b>     | potassium voltage-gated channel, KQT-like subfamily, member 5            | 0.65 | 9.8E-05 | 5.4E-04 |
| 3736636 | <b>C1QTNF1</b>   | C1q and tumor necrosis factor related protein 1                          | 0.65 | 3.8E-06 | 4.3E-05 |
| 3984779 | <b>HNRNPH2</b>   | heterogeneous nuclear ribonucleoprotein H2 (H')                          | 0.65 | 7.7E-05 | 4.5E-04 |
| 3214451 | <b>NFIL3</b>     | nuclear factor, interleukin 3 regulated                                  | 0.65 | 6.1E-04 | 2.3E-03 |
| 3230610 | <b>ABCA2</b>     | ATP-binding cassette, sub-family A (ABC1), member 2                      | 0.65 | 8.7E-08 | 2.9E-06 |
| 3335338 | <b>FAM89B</b>    | family with sequence similarity 89, member B                             | 0.65 | 2.8E-06 | 3.6E-05 |
| 3868963 | <b>ETFB</b>      | electron-transfer-flavoprotein, beta polypeptide                         | 0.65 | 2.9E-06 | 3.6E-05 |
| 2977265 | <b>HIVP2</b>     | human immunodeficiency virus type I enhancer binding protein 2           | 0.65 | 1.5E-03 | 4.5E-03 |
| 2915828 | <b>NT5E</b>      | 5'-nucleotidase, ecto (CD73)                                             | 0.65 | 1.2E-05 | 1.0E-04 |
| 2970985 | <b>TSPYL4</b>    | TSPY-like 4                                                              | 0.65 | 5.1E-07 | 1.0E-05 |
| 3895795 | <b>RNF24</b>     | ring finger protein 24                                                   | 0.64 | 3.4E-07 | 7.6E-06 |
| 2643592 | <b>EPHB1</b>     | EPH receptor B1                                                          | 0.64 | 7.4E-06 | 7.3E-05 |
| 3732230 | <b>PITPNC1</b>   | phosphatidylinositol transfer protein, cytoplasmic 1                     | 0.64 | 2.3E-05 | 1.7E-04 |
| 3018866 | <b>DNAJB9</b>    | DnaJ (Hsp40) homolog, subfamily B, member 9                              | 0.64 | 3.9E-04 | 1.6E-03 |
| 2949859 | <b>PBX2</b>      | pre-B-cell leukemia homeobox 2                                           | 0.64 | 1.6E-02 | 3.1E-02 |
| 2821347 | <b>ERAP2</b>     | endoplasmic reticulum aminopeptidase 2                                   | 0.64 | 8.8E-04 | 3.0E-03 |
| 3758510 | <b>ETV4</b>      | ets variant 4                                                            | 0.64 | 1.2E-05 | 1.0E-04 |
| 3368748 | <b>FBXO3</b>     | F-box protein 3                                                          | 0.64 | 1.4E-04 | 7.0E-04 |
| 3830051 | <b>SCN1B</b>     | sodium channel, voltage-gated, type I, beta                              | 0.64 | 6.7E-06 | 6.7E-05 |
| 3145801 | <b>TSPYL5</b>    | TSPY-like 5                                                              | 0.64 | 1.3E-05 | 1.1E-04 |
| 2792420 | <b>TMEM192</b>   | transmembrane protein 192                                                | 0.64 | 1.8E-04 | 8.9E-04 |
| 2649113 | <b>TIPARP</b>    | TCDD-inducible poly(ADP-ribose) polymerase                               | 0.64 | 1.3E-05 | 1.2E-04 |
| 3712062 | <b>TRPV2</b>     | transient receptor potential cation channel, subfamily V, member 2       | 0.64 | 1.4E-06 | 2.1E-05 |
| 3448975 | <b>ERGIC2</b>    | ERGIC and golgi 2                                                        | 0.64 | 2.6E-03 | 7.2E-03 |
| 3163818 | <b>SH3GL2</b>    | SH3-domain GRB2-like 2                                                   | 0.64 | 3.6E-05 | 2.5E-04 |

|         |                  |                                                                                           |      |         |         |
|---------|------------------|-------------------------------------------------------------------------------------------|------|---------|---------|
| 2934308 | <b>IGF2R</b>     | insulin-like growth factor 2 receptor                                                     | 0.64 | 2.0E-06 | 2.8E-05 |
| 3762473 | <b>TOB1</b>      | transducer of ERBB2, 1                                                                    | 0.64 | 2.2E-06 | 3.0E-05 |
| 2806468 | <b>IL7R</b>      | interleukin 7 receptor                                                                    | 0.63 | 1.6E-04 | 8.1E-04 |
| 3835467 | <b>ZNF234</b>    | zinc finger protein 234                                                                   | 0.63 | 5.5E-04 | 2.1E-03 |
| 3432514 | <b>OAS2</b>      | 2'-5'-oligoadenylate synthetase 2, 69/71kDa                                               | 0.63 | 5.7E-04 | 2.2E-03 |
| 2583602 | <b>RBMS1</b>     | RNA binding motif, single stranded interacting protein 1                                  | 0.63 | 5.2E-04 | 2.0E-03 |
| 2849469 | <b>ANKH</b>      | ankylosis, progressive homolog (mouse)                                                    | 0.63 | 6.2E-06 | 6.4E-05 |
| 2832499 | <b>PCDHB15</b>   | protocadherin beta 15 // protocadherin beta 15                                            | 0.63 | 4.0E-05 | 2.7E-04 |
| 3662650 | <b>ARL2BP</b>    | ADP-ribosylation factor-like 2 binding protein                                            | 0.63 | 1.3E-06 | 2.0E-05 |
| 3578069 | <b>C14ORF139</b> | chromosome 14 open reading frame 139                                                      | 0.63 | 7.2E-05 | 4.2E-04 |
| 2832325 | <b>PCDHB5</b>    | protocadherin beta 5                                                                      | 0.63 | 9.2E-05 | 5.1E-04 |
| 3859946 | <b>HSPB6</b>     | heat shock protein, alpha-crystallin-related, B6                                          | 0.63 | 3.1E-06 | 3.8E-05 |
| 2326496 | <b>DHDDS</b>     | dehydrodolichyl diphosphate synthase                                                      | 0.63 | 2.1E-06 | 2.9E-05 |
| 3215146 | <b>NINJ1</b>     | ninjurin 1                                                                                | 0.63 | 1.4E-05 | 1.2E-04 |
| 3188111 | <b>PTGS1</b>     | prostaglandin-endoperoxide synthase 1 (prostaglandin G/H synthase and cyclooxygenase)     | 0.63 | 2.5E-06 | 3.3E-05 |
| 3878836 | <b>RIN2</b>      | Ras and Rab interactor 2                                                                  | 0.62 | 5.2E-06 | 5.5E-05 |
| 2992963 | <b>CCDC126</b>   | coiled-coil domain containing 126                                                         | 0.62 | 2.1E-04 | 9.9E-04 |
| 3444503 | <b>TAS2R31</b>   | taste receptor, type 2, member 31                                                         | 0.62 | 5.4E-03 | 1.3E-02 |
| 3318666 | <b>SMPD1</b>     | sphingomyelin phosphodiesterase 1, acid lysosomal                                         | 0.62 | 2.6E-07 | 6.1E-06 |
| 4048764 | <b>C6ORF35</b>   | chromosome 6 open reading frame 35                                                        | 0.62 | 2.6E-03 | 7.2E-03 |
| 2887490 | <b>STC2</b>      | stanniocalcin 2                                                                           | 0.62 | 7.8E-06 | 7.6E-05 |
| 2406139 | <b>KIAA0319L</b> | KIAA0319-like                                                                             | 0.62 | 1.3E-06 | 2.0E-05 |
| 3845495 | <b>REXO1</b>     | REX1, RNA exonuclease 1 homolog (S. cerevisiae)                                           | 0.62 | 2.7E-05 | 2.0E-04 |
| 3403567 | <b>NECAP1</b>    | NECAP endocytosis associated 1                                                            | 0.62 | 2.8E-05 | 2.1E-04 |
| 3412345 | <b>TMEM117</b>   | transmembrane protein 117                                                                 | 0.62 | 6.1E-04 | 2.3E-03 |
| 3324713 | <b>METT5D1</b>   | methyltransferase 5 domain containing 1                                                   | 0.62 | 2.8E-02 | 4.8E-02 |
| 2731636 | <b>PARM1</b>     | prostate androgen-regulated mucin-like protein 1                                          | 0.62 | 3.6E-06 | 4.2E-05 |
| 2824581 | <b>KCNN2</b>     | potassium intermediate/small conductance calcium-activated channel, subfamily N, member 2 | 0.62 | 1.2E-04 | 6.4E-04 |
| 2645387 | <b>ACPL2</b>     | acid phosphatase-like 2                                                                   | 0.62 | 1.6E-05 | 1.3E-04 |
| 3496916 | <b>GPR180</b>    | G protein-coupled receptor 180                                                            | 0.62 | 1.7E-03 | 5.1E-03 |
| 3786471 | <b>SETBP1</b>    | SET binding protein 1                                                                     | 0.62 | 1.8E-06 | 2.5E-05 |
| 3214668 | <b>IARS</b>      | isoleucyl-tRNA synthetase                                                                 | 0.61 | 1.8E-07 | 4.9E-06 |
| 3364095 | <b>CYP2R1</b>    | cytochrome P450, family 2, subfamily R, polypeptide 1                                     | 0.61 | 2.1E-05 | 1.6E-04 |
| 3840883 | <b>ZNF761</b>    | zinc finger protein 761                                                                   | 0.61 | 3.3E-04 | 1.4E-03 |
| 2979267 | <b>ULBP3</b>     | UL16 binding protein 3                                                                    | 0.61 | 1.2E-04 | 6.4E-04 |
| 3021158 | <b>C7ORF58</b>   | chromosome 7 open reading frame 58                                                        | 0.61 | 2.3E-04 | 1.0E-03 |
| 3237548 | <b>ARL5B</b>     | ADP-ribosylation factor-like 5B                                                           | 0.61 | 7.7E-04 | 2.7E-03 |
| 3729014 | <b>GDPD1</b>     | glycerophosphodiester phosphodiesterase domain containing 1                               | 0.61 | 1.0E-04 | 5.5E-04 |
| 3894322 | <b>SRXN1</b>     | sulfiredoxin 1                                                                            | 0.61 | 2.1E-05 | 1.6E-04 |
| 3701297 | <b>CDYL2</b>     | chromodomain protein, Y-like 2                                                            | 0.61 | 6.1E-06 | 6.4E-05 |
| 2645275 | <b>SLC25A36</b>  | solute carrier family 25, member 36                                                       | 0.61 | 6.0E-03 | 1.4E-02 |
| 3127775 | <b>TNFRSF10A</b> | tumor necrosis factor receptor superfamily, member 10a                                    | 0.61 | 1.6E-06 | 2.4E-05 |
| 3957207 | <b>GATSL3</b>    | GATS protein-like 3                                                                       | 0.61 | 2.0E-07 | 5.2E-06 |
| 3764872 | <b>PTRH2</b>     | peptidyl-tRNA hydrolase 2                                                                 | 0.61 | 1.3E-04 | 6.5E-04 |
| 3190659 | <b>SET</b>       | SET nuclear oncogene                                                                      | 0.61 | 1.0E-06 | 1.7E-05 |
| 3843399 | <b>ZNF134</b>    | zinc finger protein 134                                                                   | 0.61 | 1.5E-04 | 7.5E-04 |
| 3432678 | <b>TPCN1</b>     | two pore segment channel 1                                                                | 0.61 | 1.4E-05 | 1.2E-04 |
| 2731757 | <b>THAP6</b>     | THAP domain containing 6                                                                  | 0.61 | 7.9E-04 | 2.8E-03 |
| 2709414 | <b>TBCCD1</b>    | TBCC domain containing 1                                                                  | 0.61 | 1.0E-03 | 3.3E-03 |
| 3294159 | <b>P4HA1</b>     | prolyl 4-hydroxylase, alpha polypeptide 1                                                 | 0.61 | 2.8E-04 | 1.2E-03 |
| 2473784 | <b>EPT1</b>      | ethanolaminephosphotransferase 1 (CDP-ethanolamine-specific)                              | 0.60 | 3.4E-04 | 1.4E-03 |
| 3352904 | <b>SC5DL</b>     | sterol-C5-desaturase (ERG3 delta-5-desaturase homolog, S. cerevisiae)-like                | 0.60 | 1.1E-03 | 3.7E-03 |
| 3542063 | <b>SLC39A9</b>   | solute carrier family 39 (zinc transporter), member 9                                     | 0.60 | 2.0E-06 | 2.8E-05 |
| 3695107 | <b>TK2</b>       | thymidine kinase 2, mitochondrial                                                         | 0.60 | 6.1E-07 | 1.2E-05 |
| 3204558 | <b>KIAA1539</b>  | KIAA1539                                                                                  | 0.60 | 4.9E-07 | 9.8E-06 |
| 3842724 | <b>ZNF583</b>    | zinc finger protein 583                                                                   | 0.60 | 2.6E-03 | 7.1E-03 |
| 2916345 | <b>SLC35A1</b>   | solute carrier family 35 (CMP-sialic acid transporter), member A1                         | 0.60 | 2.1E-03 | 6.1E-03 |
| 3837504 | <b>SEPW1</b>     | selenoprotein W, 1                                                                        | 0.60 | 1.0E-05 | 9.5E-05 |
| 4028512 | <b>RPS4Y1</b>    | ribosomal protein S4, Y-linked 1                                                          | 0.60 | 7.6E-05 | 4.4E-04 |
| 2867443 | <b>MCTP1</b>     | multiple C2 domains, transmembrane 1                                                      | 0.60 | 5.1E-05 | 3.2E-04 |
| 3449700 | <b>FAM60A</b>    | family with sequence similarity 60, member A                                              | 0.60 | 5.5E-05 | 3.5E-04 |
| 3047660 | <b>GLI3</b>      | GLI family zinc finger 3                                                                  | 0.60 | 4.3E-05 | 2.8E-04 |
| 3019793 | <b>FOXP2</b>     | forkhead box P2                                                                           | 0.60 | 6.1E-06 | 6.3E-05 |
| 2730746 | <b>SLC4A4</b>    | solute carrier family 4, sodium bicarbonate cotransporter, member 4                       | 0.60 | 2.1E-04 | 1.0E-03 |
| 3572278 | <b>NEK9</b>      | NIMA (never in mitosis gene a)- related kinase 9                                          | 0.60 | 1.4E-06 | 2.1E-05 |
| 3854756 | <b>RAB3A</b>     | RAB3A, member RAS oncogene family                                                         | 0.60 | 5.3E-05 | 3.3E-04 |
| 3429460 | <b>TXNRD1</b>    | thioredoxin reductase 1                                                                   | 0.60 | 1.6E-05 | 1.3E-04 |
| 3919033 | <b>SLC5A3</b>    | solute carrier family 5 (sodium/myo-inositol cotransporter), member 3                     | 0.60 | 6.0E-04 | 2.3E-03 |
| 3154317 | <b>NDRG1</b>     | N-myc downstream regulated 1                                                              | 0.60 | 8.1E-06 | 7.8E-05 |
| 2935475 | <b>QKI</b>       | quaking homolog, KH domain RNA binding (mouse)                                            | 0.60 | 2.6E-04 | 1.2E-03 |
| 3744410 | <b>KRBA2</b>     | KRAB-A domain containing 2                                                                | 0.59 | 1.9E-02 | 3.5E-02 |



|         |                  |                                                                                                 |       |         |         |
|---------|------------------|-------------------------------------------------------------------------------------------------|-------|---------|---------|
| 2771718 | <b>UBA6</b>      | ubiquitin-like modifier activating enzyme 6                                                     | 0.59  | 2.0E-03 | 5.8E-03 |
| 2650393 | <b>PPM1L</b>     | protein phosphatase, Mg2+/Mn2+ dependent, 1L                                                    | 0.59  | 3.8E-05 | 2.6E-04 |
| 2420615 | <b>LPAR3</b>     | lysophosphatidic acid receptor 3                                                                | 0.59  | 1.1E-03 | 3.6E-03 |
| 3230811 | <b>DPP7</b>      | dipeptidyl-peptidase 7                                                                          | 0.59  | 1.6E-06 | 2.3E-05 |
| 2492064 | <b>KDM3A</b>     | lysine (K)-specific demethylase 3A                                                              | 0.59  | 5.0E-04 | 1.9E-03 |
| 3744800 | <b>STX8</b>      | syntaxin 8                                                                                      | 0.59  | 1.8E-04 | 8.7E-04 |
| 3592023 | <b>B2M</b>       | beta-2-microglobulin                                                                            | 0.59  | 3.6E-06 | 4.2E-05 |
| 3613725 | <b>NDN</b>       | necdin homolog (mouse)                                                                          | 0.59  | 5.8E-05 | 3.6E-04 |
| 3566495 | <b>C14ORF37</b>  | chromosome 14 open reading frame 37                                                             | 0.59  | 3.9E-05 | 2.6E-04 |
| 2977621 | <b>PLAGL1</b>    | pleiomorphic adenoma gene-like 1                                                                | 0.59  | 3.0E-05 | 2.1E-04 |
| 3430776 | <b>ISCU</b>      | iron-sulfur cluster scaffold homolog (E. coli)                                                  | 0.59  | 1.6E-05 | 1.3E-04 |
| 3452231 | <b>SLC38A1</b>   | solute carrier family 38, member 1                                                              | 0.59  | 6.6E-05 | 4.0E-04 |
| 3821727 | <b>ZNF136</b>    | zinc finger protein 136                                                                         | 0.59  | 7.1E-05 | 4.2E-04 |
| 2639225 | <b>PDIA5</b>     | protein disulfide isomerase family A, member 5                                                  | 0.59  | 1.1E-05 | 9.6E-05 |
| 3058209 | <b>MAGI2</b>     | membrane associated guanylate kinase, WW and PDZ domain containing 2                            | 0.59  | 2.9E-05 | 2.1E-04 |
| 3690193 | <b>ITFG1</b>     | integrin alpha FG-GAP repeat containing 1                                                       | 0.59  | 1.3E-04 | 6.5E-04 |
| 2519294 | <b>FAM171B</b>   | family with sequence similarity 171, member B                                                   | 0.59  | 4.3E-03 | 1.1E-02 |
| 3774906 | <b>SECTM1</b>    | secreted and transmembrane 1                                                                    | 0.59  | 8.1E-06 | 7.8E-05 |
| 3924372 | <b>COL6A1</b>    | collagen, type VI, alpha 1                                                                      | 0.59  | 1.8E-06 | 2.5E-05 |
|         |                  |                                                                                                 |       |         |         |
| 2946345 | <b>HIST1H2BG</b> | histone cluster 1, H2bg                                                                         | -0.59 | 3.0E-04 | 1.3E-03 |
| 3380996 | <b>C11ORF51</b>  | chromosome 11 open reading frame 51                                                             | -0.59 | 2.2E-06 | 3.0E-05 |
| 3250093 | <b>KIAA1279</b>  | KIAA1279                                                                                        | -0.59 | 3.0E-06 | 3.7E-05 |
| 3630450 | <b>AAGAB</b>     | alpha- and gamma-adaptin binding protein                                                        | -0.59 | 5.1E-05 | 3.2E-04 |
| 3355145 | <b>ST3GAL4</b>   | ST3 beta-galactoside alpha-2,3-sialyltransferase 4                                              | -0.59 | 2.1E-05 | 1.6E-04 |
| 4019486 | <b>SEPT6</b>     | septin 6                                                                                        | -0.59 | 3.9E-06 | 4.4E-05 |
| 2591906 | <b>OSGEP1L1</b>  | O-sialoglycoprotein endopeptidase-like 1                                                        | -0.59 | 2.4E-04 | 1.1E-03 |
| 3215701 | <b>FANCC</b>     | Fanconi anemia, complementation group C                                                         | -0.59 | 1.4E-05 | 1.2E-04 |
| 3445908 | <b>EPS8</b>      | epidermal growth factor receptor pathway substrate 8                                            | -0.59 | 1.2E-05 | 1.0E-04 |
| 3436544 | <b>BRI3BP</b>    | BRI3 binding protein                                                                            | -0.59 | 1.5E-05 | 1.3E-04 |
| 2451593 | <b>CHI3L1</b>    | chitinase 3-like 1 (cartilage glycoprotein-39)                                                  | -0.59 | 2.6E-05 | 1.9E-04 |
| 3113456 | <b>MTBP</b>      | Mdm2, transformed 3T3 cell double minute 2, p53 binding protein (mouse) binding protein, 104kDa | -0.59 | 7.7E-04 | 2.7E-03 |
| 3249641 | <b>MYPN</b>      | myopalladin                                                                                     | -0.59 | 3.4E-07 | 7.5E-06 |
| 3623031 | <b>FBN1</b>      | fibrillin 1                                                                                     | -0.59 | 2.7E-05 | 2.0E-04 |
| 2601648 | <b>DOCK10</b>    | dedicator of cytokinesis 10                                                                     | -0.59 | 8.3E-04 | 2.9E-03 |
| 2713555 | <b>KIAA0226</b>  | KIAA0226                                                                                        | -0.59 | 1.3E-06 | 2.0E-05 |
| 3842264 | <b>NAT14</b>     | N-acetyltransferase 14 (GCN5-related, putative)                                                 | -0.60 | 3.1E-05 | 2.2E-04 |
| 2510884 | <b>ARL6IP6</b>   | ADP-ribosylation-like factor 6 interacting protein 6                                            | -0.60 | 2.4E-03 | 6.7E-03 |
| 2835006 | <b>GRPEL2</b>    | GrpE-like 2, mitochondrial (E. coli)                                                            | -0.60 | 2.0E-04 | 9.5E-04 |
| 2474977 | <b>FOSL2</b>     | FOS-like antigen 2                                                                              | -0.60 | 4.4E-06 | 4.8E-05 |
| 3354879 | <b>HYLS1</b>     | hydrolethalus syndrome 1                                                                        | -0.60 | 1.1E-04 | 5.8E-04 |
| 3941010 | <b>SRR</b>       | SRR1 domain containing                                                                          | -0.60 | 1.5E-06 | 2.3E-05 |
| 3178480 | <b>NXNL2</b>     | nucleoredoxin-like 2                                                                            | -0.60 | 5.1E-04 | 2.0E-03 |
| 2427074 | <b>PSMA5</b>     | proteasome (prosome, macropain) subunit, alpha type, 5                                          | -0.60 | 5.0E-05 | 3.2E-04 |
| 3028956 | <b>TAS2R39</b>   | taste receptor, type 2, member 39                                                               | -0.60 | 1.6E-02 | 3.1E-02 |
| 2903285 | <b>PSMB9</b>     | proteasome (prosome, macropain) subunit, beta type, 9 (large multifunctional peptidase 2)       | -0.60 | 2.1E-06 | 2.9E-05 |
| 3329206 | <b>CREB3L1</b>   | cAMP responsive element binding protein 3-like 1                                                | -0.60 | 1.3E-06 | 2.0E-05 |
| 3719210 | <b>DHRS11</b>    | dehydrogenase/reductase (SDR family) member 11                                                  | -0.60 | 8.8E-06 | 8.4E-05 |
| 2460325 | <b>C1ORF198</b>  | chromosome 1 open reading frame 198                                                             | -0.60 | 6.9E-06 | 6.9E-05 |
| 2523689 | <b>ABI2</b>      | abl-interactor 2                                                                                | -0.60 | 2.5E-05 | 1.9E-04 |
| 3094334 | <b>GPR124</b>    | G protein-coupled receptor 124                                                                  | -0.60 | 6.3E-06 | 6.4E-05 |
| 3703885 | <b>SLC7A5</b>    | solute carrier family 7 (cationic amino acid transporter, y+ system), member 5                  | -0.60 | 1.2E-07 | 3.6E-06 |
| 3671935 | <b>CRISPLD2</b>  | cysteine-rich secretory protein LCCL domain containing 2                                        | -0.60 | 2.8E-05 | 2.0E-04 |
| 2705748 | <b>NCEH1</b>     | neutral cholesterol ester hydrolase 1                                                           | -0.60 | 2.5E-05 | 1.8E-04 |
| 2812435 | <b>ERBB2IP</b>   | erbB2 interacting protein                                                                       | -0.60 | 4.7E-03 | 1.1E-02 |
| 2475710 | <b>LCLAT1</b>    | lysocardiolipin acyltransferase 1                                                               | -0.60 | 1.6E-05 | 1.3E-04 |
| 2427791 | <b>DENND2D</b>   | DENN/MADD domain containing 2D                                                                  | -0.60 | 5.8E-06 | 6.1E-05 |
| 3453712 | <b>RHEBL1</b>    | Ras homolog enriched in brain like 1                                                            | -0.61 | 5.0E-04 | 1.9E-03 |
| 3694657 | <b>CDH11</b>     | cadherin 11, type 2, OB-cadherin (osteoblast)                                                   | -0.61 | 6.4E-06 | 6.6E-05 |
| 2710474 | <b>LEPREL1</b>   | leprecan-like 1                                                                                 | -0.61 | 8.8E-05 | 4.9E-04 |
| 2437801 | <b>ARHGEF2</b>   | Rho/Rac guanine nucleotide exchange factor (GEF) 2                                              | -0.61 | 4.0E-06 | 4.6E-05 |
| 3485863 | <b>EXOSC8</b>    | exosome component 8                                                                             | -0.61 | 5.2E-05 | 3.3E-04 |
| 2644461 | <b>ARMC8</b>     | armadillo repeat containing 8                                                                   | -0.61 | 1.8E-04 | 8.9E-04 |
| 3042973 | <b>HOXA11</b>    | homeobox A11                                                                                    | -0.61 | 5.6E-06 | 5.8E-05 |
| 2785282 | <b>SCLT1</b>     | sodium channel and clathrin linker 1                                                            | -0.61 | 5.5E-04 | 2.1E-03 |
| 2847292 | <b>NSUN2</b>     | NOP2/Sun domain family, member 2                                                                | -0.61 | 3.2E-06 | 3.9E-05 |
| 3309755 | <b>C10ORF119</b> | chromosome 10 open reading frame 119                                                            | -0.61 | 9.3E-07 | 1.6E-05 |
| 3417184 | <b>SUOX</b>      | sulfite oxidase                                                                                 | -0.61 | 1.4E-06 | 2.2E-05 |
| 3534785 | <b>PPIL5</b>     | peptidylprolyl isomerase (cyclophilin)-like 5                                                   | -0.61 | 1.6E-05 | 1.3E-04 |

|         |                 |                                                                     |       |         |         |
|---------|-----------------|---------------------------------------------------------------------|-------|---------|---------|
| 2360206 | <b>ATP8B2</b>   | ATPase, class I, type 8B, member 2                                  | -0.61 | 1.0E-05 | 9.4E-05 |
| 2584904 | <b>SLC38A11</b> | solute carrier family 38, member 11                                 | -0.61 | 8.0E-05 | 4.6E-04 |
| 3643938 | <b>TMEM204</b>  | transmembrane protein 204                                           | -0.61 | 1.1E-06 | 1.8E-05 |
| 2752006 | <b>SAP30</b>    | Sin3A-associated protein, 30kDa                                     | -0.61 | 4.3E-05 | 2.8E-04 |
| 3390180 | <b>KDEL2</b>    | KDEL (Lys-Asp-Glu-Leu) containing 2                                 | -0.62 | 1.7E-04 | 8.2E-04 |
| 3865635 | <b>DMPK</b>     | dystrophia myotonica-protein kinase                                 | -0.62 | 6.3E-06 | 6.5E-05 |
| 2697490 | <b>CEP70</b>    | centrosomal protein 70kDa                                           | -0.62 | 7.6E-04 | 2.7E-03 |
| 3833757 | <b>SNRPA</b>    | small nuclear ribonucleoprotein polypeptide A                       | -0.62 | 4.0E-06 | 4.5E-05 |
| 3733065 | <b>MAP2K6</b>   | mitogen-activated protein kinase kinase 6                           | -0.62 | 3.0E-05 | 2.2E-04 |
| 3361531 | <b>OR10A3</b>   | olfactory receptor, family 10, subfamily A, member 3                | -0.62 | 3.6E-03 | 9.2E-03 |
| 2739792 | <b>ALPK1</b>    | alpha-kinase 1                                                      | -0.62 | 1.2E-05 | 1.1E-04 |
| 3907524 | <b>PLTP</b>     | phospholipid transfer protein                                       | -0.62 | 1.4E-07 | 4.1E-06 |
| 3505937 | <b>CENPJ</b>    | centromere protein J                                                | -0.62 | 4.1E-04 | 1.7E-03 |
| 3601511 | <b>ISLR</b>     | immunoglobulin superfamily containing leucine-rich repeat           | -0.62 | 1.8E-04 | 8.8E-04 |
| 3380901 | <b>NUMA1</b>    | nuclear mitotic apparatus protein 1                                 | -0.62 | 1.8E-07 | 4.7E-06 |
| 2791894 | <b>FSTL5</b>    | folliculin-like 5                                                   | -0.62 | 7.1E-03 | 1.6E-02 |
| 3333247 | <b>FADS2</b>    | fatty acid desaturase 2                                             | -0.63 | 1.4E-06 | 2.1E-05 |
| 3350830 | <b>TAGLN</b>    | transgelin                                                          | -0.63 | 5.3E-07 | 1.0E-05 |
| 2738723 | <b>HADH</b>     | hydroxyacyl-CoA dehydrogenase                                       | -0.63 | 2.3E-05 | 1.7E-04 |
| 3387483 | <b>MTMR2</b>    | myotubularin related protein 2                                      | -0.63 | 2.2E-05 | 1.7E-04 |
| 3744463 | <b>MYH10</b>    | myosin, heavy chain 10, non-muscle                                  | -0.63 | 2.9E-04 | 1.3E-03 |
| 3904566 | <b>DSN1</b>     | DSN1, MIND kinetochore complex component, homolog (S. cerevisiae)   | -0.63 | 7.1E-06 | 7.1E-05 |
| 3199790 | <b>PSIP1</b>    | PC4 and SFRS1 interacting protein 1                                 | -0.63 | 1.8E-04 | 8.8E-04 |
| 3754227 | <b>MYO19</b>    | myosin XIX                                                          | -0.63 | 4.4E-05 | 2.9E-04 |
| 2664452 | <b>ANKRD28</b>  | ankyrin repeat domain 28                                            | -0.63 | 6.1E-04 | 2.3E-03 |
| 2407478 | <b>FHL3</b>     | four and a half LIM domains 3                                       | -0.63 | 4.8E-06 | 5.2E-05 |
| 3976519 | <b>RBM3</b>     | RNA binding motif (RNP1, RRM) protein 3                             | -0.63 | 1.5E-07 | 4.2E-06 |
| 3251298 | <b>CHST3</b>    | carbohydrate (chondroitin 6) sulfotransferase 3                     | -0.63 | 7.2E-07 | 1.3E-05 |
| 3822195 | <b>NACC1</b>    | nucleus accumbens associated 1, BEN and BTB (POZ) domain containing | -0.63 | 1.3E-07 | 3.9E-06 |
| 2980258 | <b>MTRF1L</b>   | mitochondrial translational release factor 1-like                   | -0.63 | 2.4E-03 | 6.7E-03 |
| 3838118 | <b>RUVBL2</b>   | RuvB-like 2 (E. coli)                                               | -0.63 | 7.3E-06 | 7.3E-05 |
| 3401197 | <b>C12ORF32</b> | chromosome 12 open reading frame 32                                 | -0.63 | 1.9E-06 | 2.7E-05 |
| 3223425 | <b>CDK5RAP2</b> | CDK5 regulatory subunit associated protein 2                        | -0.63 | 1.2E-04 | 6.2E-04 |
| 3466556 | <b>NTN4</b>     | netrin 4                                                            | -0.63 | 4.0E-03 | 1.0E-02 |
| 2835576 | <b>SYNPO</b>    | synaptopodin                                                        | -0.64 | 2.4E-06 | 3.2E-05 |
| 2359764 | <b>SNAPIN</b>   | SNAP-associated protein                                             | -0.64 | 4.3E-05 | 2.8E-04 |
| 3304004 | <b>NPM3</b>     | nucleophosmin/nucleoplasmin 3                                       | -0.64 | 4.6E-06 | 5.0E-05 |
| 3355056 | <b>FOXRED1</b>  | FAD-dependent oxidoreductase domain containing 1                    | -0.64 | 1.3E-04 | 6.6E-04 |
| 3417531 | <b>COQ10A</b>   | coenzyme Q10 homolog A (S. cerevisiae)                              | -0.64 | 1.9E-05 | 1.5E-04 |
| 3281703 | <b>PRTFDC1</b>  | phosphoribosyl transferase domain containing 1                      | -0.64 | 2.1E-06 | 2.9E-05 |
| 2454935 | <b>ANGEL2</b>   | angel homolog 2 (Drosophila)                                        | -0.64 | 1.9E-05 | 1.5E-04 |
| 3845909 | <b>LMNB2</b>    | lamin B2                                                            | -0.64 | 1.2E-06 | 1.9E-05 |
| 3023149 | <b>FLNC</b>     | filamin C, gamma                                                    | -0.64 | 1.3E-06 | 2.0E-05 |
| 3065740 | <b>RELN</b>     | reelin                                                              | -0.64 | 2.6E-04 | 1.2E-03 |
| 2328868 | <b>HDAC1</b>    | histone deacetylase 1                                               | -0.64 | 2.4E-06 | 3.2E-05 |
| 3322717 | <b>GTF2H1</b>   | general transcription factor IIH, polypeptide 1, 62kDa              | -0.64 | 9.6E-06 | 8.8E-05 |
| 3373724 | <b>SSRP1</b>    | structure specific recognition protein 1                            | -0.64 | 3.5E-07 | 7.7E-06 |
| 3510066 | <b>POSTN</b>    | periostin, osteoblast specific factor                               | -0.64 | 6.6E-04 | 2.4E-03 |
| 2730714 | <b>DCK</b>      | deoxycytidine kinase                                                | -0.64 | 2.7E-03 | 7.3E-03 |
| 3633048 | <b>EDC3</b>     | enhancer of mRNA decapping 3 homolog (S. cerevisiae)                | -0.64 | 1.9E-06 | 2.7E-05 |
| 2343231 | <b>NEXN</b>     | nexilin (F actin binding protein)                                   | -0.65 | 4.8E-03 | 1.2E-02 |
| 2877314 | <b>CDC23</b>    | cell division cycle 23 homolog (S. cerevisiae)                      | -0.65 | 1.6E-05 | 1.3E-04 |
| 3388785 | <b>MMP10</b>    | matrix metalloproteinase 10 (stromelysin 2)                         | -0.65 | 1.4E-03 | 4.4E-03 |
| 2358993 | <b>TUFT1</b>    | tuftelin 1                                                          | -0.65 | 9.1E-06 | 8.6E-05 |
| 2885099 | <b>NUDCD2</b>   | NudC domain containing 2                                            | -0.65 | 1.5E-05 | 1.3E-04 |
| 3226644 | <b>ZDHHC12</b>  | zinc finger, DHHC-type containing 12                                | -0.65 | 4.8E-07 | 9.7E-06 |
| 2890148 | <b>HNRNPH1</b>  | heterogeneous nuclear ribonucleoprotein H1 (H)                      | -0.65 | 1.3E-04 | 6.6E-04 |
| 2474681 | <b>GPN1</b>     | GPN-loop GTPase 1                                                   | -0.65 | 5.7E-06 | 6.0E-05 |
| 2945741 | <b>FAM65B</b>   | family with sequence similarity 65, member B                        | -0.65 | 4.3E-05 | 2.8E-04 |
| 3405440 | <b>CDKN1B</b>   | cyclin-dependent kinase inhibitor 1B (p27, Kip1)                    | -0.65 | 1.8E-04 | 8.8E-04 |
| 3235414 | <b>SEC61A2</b>  | Sec61 alpha 2 subunit (S. cerevisiae)                               | -0.65 | 3.6E-05 | 2.5E-04 |
| 3150715 | <b>DSCC1</b>    | defective in sister chromatid cohesion 1 homolog (S. cerevisiae)    | -0.65 | 1.5E-04 | 7.3E-04 |
| 2364381 | <b>RGS4</b>     | regulator of G-protein signaling 4                                  | -0.66 | 1.7E-05 | 1.4E-04 |
| 2352804 | <b>OLFML3</b>   | olfactomedin-like 3                                                 | -0.66 | 4.9E-07 | 9.8E-06 |
| 2769947 | <b>CLOCK</b>    | clock homolog (mouse)                                               | -0.66 | 4.9E-04 | 1.9E-03 |
| 2902633 | <b>MSH5</b>     | mutS homolog 5 (E. coli)                                            | -0.66 | 5.9E-07 | 1.1E-05 |
| 3653398 | <b>TNRC6A</b>   | trinucleotide repeat containing 6A                                  | -0.66 | 4.8E-04 | 1.9E-03 |
| 2523045 | <b>FZD7</b>     | frizzled homolog 7 (Drosophila)                                     | -0.66 | 9.0E-06 | 8.5E-05 |
| 2827057 | <b>GRAMD3</b>   | GRAM domain containing 3                                            | -0.66 | 2.9E-05 | 2.1E-04 |
| 3144973 | <b>RAD54B</b>   | RAD54 homolog B (S. cerevisiae)                                     | -0.66 | 2.3E-06 | 3.1E-05 |
| 2439842 | <b>TAGLN2</b>   | transgelin 2                                                        | -0.66 | 7.9E-08 | 2.7E-06 |
| 2948564 | <b>MDC1</b>     | mediator of DNA-damage checkpoint 1                                 | -0.66 | 7.4E-07 | 1.4E-05 |

|         |                 |                                                                                                                        |       |         |         |
|---------|-----------------|------------------------------------------------------------------------------------------------------------------------|-------|---------|---------|
| 2742134 | <b>SPATA5</b>   | spermatogenesis associated 5                                                                                           | -0.66 | 2.9E-05 | 2.1E-04 |
| 3373845 | <b>SLC43A3</b>  | solute carrier family 43, member 3                                                                                     | -0.66 | 3.9E-06 | 4.4E-05 |
| 2943874 | <b>KIF13A</b>   | kinesin family member 13A                                                                                              | -0.67 | 2.6E-04 | 1.2E-03 |
| 2642887 | <b>CCRL1</b>    | chemokine (C-C motif) receptor-like 1                                                                                  | -0.67 | 2.6E-02 | 4.4E-02 |
| 3044129 | <b>GGCT</b>     | gamma-glutamylcyclotransferase                                                                                         | -0.67 | 1.7E-04 | 8.2E-04 |
| 2406064 | <b>SFPQ</b>     | splicing factor proline/glutamine-rich                                                                                 | -0.67 | 7.5E-06 | 7.4E-05 |
| 3665997 | <b>DUS2L</b>    | dihydrouridine synthase 2-like, SMM1 homolog (S. cerevisiae)                                                           | -0.67 | 9.4E-06 | 8.7E-05 |
| 3739108 | <b>FN3KRP</b>   | fructosamine 3 kinase related protein                                                                                  | -0.67 | 1.4E-05 | 1.2E-04 |
| 3991698 | <b>HPRT1</b>    | hypoxanthine phosphoribosyltransferase 1                                                                               | -0.67 | 7.8E-05 | 4.5E-04 |
| 3628832 | <b>DAPK2</b>    | death-associated protein kinase 2                                                                                      | -0.67 | 1.3E-06 | 2.0E-05 |
| 2336650 | <b>PODN</b>     | podocan                                                                                                                | -0.67 | 3.2E-06 | 3.8E-05 |
| 2961177 | <b>COL12A1</b>  | collagen, type XII, alpha 1                                                                                            | -0.67 | 7.7E-04 | 2.7E-03 |
| 2668351 | <b>UBP1</b>     | upstream binding protein 1 (LBP-1a)                                                                                    | -0.67 | 5.1E-06 | 5.5E-05 |
| 2655476 | <b>AP2M1</b>    | adaptor-related protein complex 2, mu 1 subunit                                                                        | -0.67 | 1.6E-05 | 1.3E-04 |
| 3723005 | <b>FZD2</b>     | frizzled homolog 2 (Drosophila)                                                                                        | -0.67 | 3.8E-07 | 8.2E-06 |
| 2336539 | <b>ZYG11A</b>   | zyg-11 homolog A (C. elegans)                                                                                          | -0.67 | 2.1E-05 | 1.6E-04 |
| 2491676 | <b>VAMP5</b>    | vesicle-associated membrane protein 5 (myobrevin)                                                                      | -0.67 | 1.1E-06 | 1.8E-05 |
| 3328389 | <b>EXT2</b>     | exostosin 2                                                                                                            | -0.67 | 7.8E-08 | 2.7E-06 |
| 3529951 | <b>NYNRIN</b>   | NYN domain and retroviral integrase containing                                                                         | -0.67 | 2.5E-05 | 1.9E-04 |
| 3176999 | <b>RMI1</b>     | RMI1, RecQ mediated genome instability 1, homolog (S. cerevisiae)                                                      | -0.67 | 7.8E-04 | 2.8E-03 |
| 2452405 | <b>NUAK2</b>    | NUAK family, SNF1-like kinase, 2                                                                                       | -0.68 | 2.7E-05 | 2.0E-04 |
| 3633578 | <b>CSPG4</b>    | chondroitin sulfate proteoglycan 4                                                                                     | -0.68 | 8.6E-07 | 1.5E-05 |
| 2347023 | <b>CCDC18</b>   | coiled-coil domain containing 18                                                                                       | -0.68 | 1.0E-03 | 3.4E-03 |
| 2674526 | <b>NICN1</b>    | nicolin 1                                                                                                              | -0.68 | 7.8E-06 | 7.6E-05 |
| 2379754 | <b>SMYD2</b>    | SET and MYND domain containing 2                                                                                       | -0.68 | 3.4E-06 | 4.0E-05 |
| 2531779 | <b>ARMC9</b>    | armadillo repeat containing 9                                                                                          | -0.68 | 7.0E-06 | 7.0E-05 |
| 2440476 | <b>F11R</b>     | F11 receptor                                                                                                           | -0.68 | 2.8E-05 | 2.1E-04 |
| 3947096 | <b>CCDC134</b>  | coiled-coil domain containing 134                                                                                      | -0.68 | 1.6E-06 | 2.4E-05 |
| 2856634 | <b>ARL15</b>    | ADP-ribosylation factor-like 15                                                                                        | -0.68 | 4.0E-04 | 1.6E-03 |
| 2403557 | <b>SNORA44</b>  | small nucleolar RNA, H/ACA box 44                                                                                      | -0.68 | 2.4E-05 | 1.8E-04 |
| 3428783 | <b>DRAM1</b>    | DNA-damage regulated autophagy modulator 1                                                                             | -0.68 | 2.8E-06 | 3.5E-05 |
| 3190463 | <b>ODF2</b>     | outer dense fiber of sperm tails 2                                                                                     | -0.68 | 1.0E-06 | 1.7E-05 |
| 2610707 | <b>HRH1</b>     | histamine receptor H1                                                                                                  | -0.68 | 3.7E-05 | 2.5E-04 |
| 2519577 | <b>COL3A1</b>   | collagen, type III, alpha 1                                                                                            | -0.68 | 4.7E-05 | 3.0E-04 |
| 3129465 | <b>INTS9</b>    | integrator complex subunit 9                                                                                           | -0.68 | 3.6E-06 | 4.3E-05 |
| 2949471 | <b>NEU1</b>     | sialidase 1 (lysosomal sialidase)                                                                                      | -0.68 | 9.8E-07 | 1.7E-05 |
| 2944491 | <b>MBOAT1</b>   | membrane bound O-acyltransferase domain containing 1                                                                   | -0.68 | 2.8E-06 | 3.5E-05 |
| 3860208 | <b>ALKBH6</b>   | alkB, alkylation repair homolog 6 (E. coli)                                                                            | -0.68 | 2.8E-05 | 2.1E-04 |
| 3714896 | <b>FAM27L</b>   | family with sequence similarity 27-like                                                                                | -0.68 | 1.2E-02 | 2.4E-02 |
| 3245682 | <b>MAPK8</b>    | mitogen-activated protein kinase 8                                                                                     | -0.68 | 1.8E-05 | 1.5E-04 |
| 3182781 | <b>SMC2</b>     | structural maintenance of chromosomes 2                                                                                | -0.68 | 7.0E-04 | 2.5E-03 |
| 4024160 | <b>ATP11C</b>   | ATPase, class VI, type 11C                                                                                             | -0.69 | 8.5E-04 | 2.9E-03 |
| 3432467 | <b>OAS3</b>     | 2'-5'-oligoadenylate synthetase 3, 100kDa                                                                              | -0.69 | 9.3E-06 | 8.7E-05 |
| 3855358 | <b>HOMER3</b>   | homer homolog 3 (Drosophila)                                                                                           | -0.69 | 2.4E-06 | 3.2E-05 |
| 2348757 | <b>HIAT1</b>    | hippocampus abundant transcript 1                                                                                      | -0.69 | 1.2E-05 | 1.1E-04 |
| 2723710 | <b>PGM2</b>     | phosphoglucomutase 2                                                                                                   | -0.69 | 2.3E-05 | 1.7E-04 |
| 2352743 | <b>DCLRE1B</b>  | DNA cross-link repair 1B                                                                                               | -0.69 | 4.0E-04 | 1.7E-03 |
| 3416278 | <b>HOXC11</b>   | homeobox C11                                                                                                           | -0.69 | 3.5E-05 | 2.4E-04 |
| 3962678 | <b>PACSIN2</b>  | protein kinase C and casein kinase substrate in neurons 2                                                              | -0.69 | 2.6E-07 | 6.1E-06 |
| 3708961 | <b>WRAP53</b>   | WD repeat containing, antisense to TP53                                                                                | -0.69 | 8.1E-06 | 7.8E-05 |
| 2863964 | <b>ARSB</b>     | arylsulfatase B                                                                                                        | -0.69 | 7.0E-06 | 7.0E-05 |
| 3817501 | <b>CHAF1A</b>   | chromatin assembly factor 1, subunit A (p150)                                                                          | -0.69 | 1.9E-05 | 1.5E-04 |
| 3102372 | <b>SULF1</b>    | sulfatase 1                                                                                                            | -0.69 | 2.2E-04 | 1.0E-03 |
| 3088213 | <b>SH2D4A</b>   | SH2 domain containing 4A                                                                                               | -0.70 | 2.6E-07 | 6.2E-06 |
| 2344888 | <b>CYR61</b>    | cysteine-rich, angiogenic inducer, 61                                                                                  | -0.70 | 9.9E-07 | 1.7E-05 |
| 2858023 | <b>PLK2</b>     | polo-like kinase 2                                                                                                     | -0.70 | 5.7E-05 | 3.6E-04 |
| 3858852 | <b>RHPN2</b>    | rhophilin, Rho GTPase binding protein 2                                                                                | -0.70 | 4.4E-04 | 1.8E-03 |
| 3757329 | <b>JUP</b>      | junction plakoglobin                                                                                                   | -0.70 | 1.3E-06 | 2.0E-05 |
| 2766492 | <b>C4ORF34</b>  | chromosome 4 open reading frame 34                                                                                     | -0.70 | 5.6E-05 | 3.5E-04 |
| 3232979 | <b>AKR1C1</b>   | aldo-keto reductase family 1, member C1 (dihydrodiol dehydrogenase 1; 20-alpha (3-alpha)-hydroxysteroid dehydrogenase) | -0.70 | 2.0E-03 | 5.7E-03 |
| 3236448 | <b>SUV39H2</b>  | suppressor of variegation 3-9 homolog 2 (Drosophila)                                                                   | -0.70 | 5.8E-05 | 3.6E-04 |
| 3323052 | <b>NAV2</b>     | neuron navigator 2                                                                                                     | -0.70 | 9.9E-07 | 1.7E-05 |
| 3683377 | <b>GPRC5B</b>   | G protein-coupled receptor, family C, group 5, member B                                                                | -0.70 | 2.1E-05 | 1.6E-04 |
| 2562198 | <b>TGOLN2</b>   | trans-golgi network protein 2                                                                                          | -0.70 | 1.8E-06 | 2.5E-05 |
| 3418610 | <b>XRCC6BP1</b> | XRCC6 binding protein 1                                                                                                | -0.71 | 1.4E-07 | 4.1E-06 |
| 3415368 | <b>KRT86</b>    | keratin 86                                                                                                             | -0.71 | 8.4E-05 | 4.7E-04 |
| 3896200 | <b>PCNA</b>     | proliferating cell nuclear antigen                                                                                     | -0.71 | 1.1E-05 | 1.0E-04 |
| 2389789 | <b>SCCPDH</b>   | saccharopine dehydrogenase (putative)                                                                                  | -0.71 | 6.6E-06 | 6.7E-05 |
| 2638467 | <b>GTF2E1</b>   | general transcription factor IIE, polypeptide 1, alpha 56kDa                                                           | -0.71 | 4.2E-05 | 2.8E-04 |
| 2999755 | <b>AEBP1</b>    | AE binding protein 1                                                                                                   | -0.71 | 2.2E-07 | 5.5E-06 |
| 4054204 | <b>APOD</b>     | apolipoprotein D                                                                                                       | -0.71 | 5.5E-05 | 3.5E-04 |
| 2880292 | <b>DPYSL3</b>   | dihydropyrimidinase-like 3                                                                                             | -0.71 | 5.0E-06 | 5.4E-05 |

|         |                   |                                                                                           |       |         |         |
|---------|-------------------|-------------------------------------------------------------------------------------------|-------|---------|---------|
| 3258260 | <b>EXOC6</b>      | exocyst complex component 6                                                               | -0.71 | 4.0E-05 | 2.7E-04 |
| 3707095 | <b>ARRB2</b>      | arrestin, beta 2                                                                          | -0.71 | 1.0E-05 | 9.3E-05 |
| 2688813 | <b>CCDC80</b>     | coiled-coil domain containing 80                                                          | -0.71 | 2.6E-07 | 6.2E-06 |
| 3994710 | <b>MAMLD1</b>     | mastermind-like domain containing 1                                                       | -0.71 | 5.2E-06 | 5.5E-05 |
| 3464747 | <b>KITLG</b>      | KIT ligand                                                                                | -0.72 | 4.7E-04 | 1.9E-03 |
| 3433538 | <b>RNFT2</b>      | ring finger protein, transmembrane 2                                                      | -0.72 | 4.0E-06 | 4.5E-05 |
| 3604006 | <b>ARNT2</b>      | aryl-hydrocarbon receptor nuclear translocator 2                                          | -0.72 | 1.9E-07 | 4.9E-06 |
| 2394784 | <b>NOL9</b>       | nucleolar protein 9                                                                       | -0.72 | 2.8E-06 | 3.5E-05 |
| 2458289 | <b>LBR</b>        | lamin B receptor                                                                          | -0.72 | 2.0E-04 | 9.6E-04 |
| 2902574 | <b>LY6G5B</b>     | lymphocyte antigen 6 complex, locus G5B                                                   | -0.72 | 4.9E-06 | 5.3E-05 |
| 3635125 | <b>MTHFS</b>      | 5,10-methenyltetrahydrofolate synthetase (5-formyltetrahydrofolate cyclo-ligase)          | -0.72 | 5.2E-06 | 5.5E-05 |
| 3645253 | <b>SRRM1</b>      | serine/arginine repetitive matrix 2                                                       | -0.72 | 1.3E-05 | 1.1E-04 |
| 3683037 | <b>ARL6IP1</b>    | ADP-ribosylation factor-like 6 interacting protein 1                                      | -0.72 | 2.5E-07 | 6.0E-06 |
| 3469319 | <b>APPL2</b>      | adaptor protein, phosphotyrosine interaction, PH domain and leucine zipper containing 2   | -0.72 | 5.4E-07 | 1.1E-05 |
| 2553911 | <b>SMEK2</b>      | SMEK homolog 2, suppressor of mek1 (Dictyostelium)                                        | -0.72 | 5.4E-05 | 3.4E-04 |
| 3367338 | <b>KIF18A</b>     | kinesin family member 18A                                                                 | -0.72 | 1.5E-04 | 7.4E-04 |
| 3223646 | <b>PSMD5</b>      | proteasome (prosome, macropain) 26S subunit, non-ATPase, 5                                | -0.72 | 7.7E-07 | 1.4E-05 |
| 3855596 | <b>NR2C2AP</b>    | nuclear receptor 2C2-associated protein                                                   | -0.73 | 3.6E-05 | 2.5E-04 |
| 2413519 | <b>HSPB11</b>     | heat shock protein family B (small), member 11                                            | -0.73 | 9.7E-06 | 8.9E-05 |
| 3772187 | <b>EPR1</b>       | effector cell peptidase receptor 1 (non-protein coding)                                   | -0.73 | 3.1E-04 | 1.3E-03 |
| 3010082 | <b>PHTF2</b>      | putative homeodomain transcription factor 2                                               | -0.73 | 2.8E-04 | 1.2E-03 |
| 3917563 | <b>KRTAP1-5</b>   | keratin associated protein 15-1                                                           | -0.73 | 1.4E-05 | 1.2E-04 |
| 3456081 | <b>RARG</b>       | retinoic acid receptor, gamma                                                             | -0.73 | 4.4E-07 | 9.1E-06 |
| 3205488 | <b>ZBTB5</b>      | zinc finger and BTB domain containing 5                                                   | -0.73 | 3.6E-06 | 4.2E-05 |
| 2519480 | <b>GULP1</b>      | GULP, engulfment adaptor PTB domain containing 1                                          | -0.73 | 4.6E-05 | 3.0E-04 |
| 3539499 | <b>RHOJ</b>       | ras homolog gene family, member J                                                         | -0.73 | 2.6E-06 | 3.3E-05 |
| 2929870 | <b>STXBP5</b>     | syntaxin binding protein 5 (tomosyn)                                                      | -0.74 | 1.6E-04 | 8.0E-04 |
| 2560286 | <b>LOXL3</b>      | lysyl oxidase-like 3                                                                      | -0.74 | 2.9E-08 | 1.3E-06 |
| 3929038 | <b>C21ORF45</b>   | chromosome 21 open reading frame 45                                                       | -0.74 | 8.3E-08 | 2.8E-06 |
| 2695941 | <b>TOPBP1</b>     | topoisomerase (DNA) II binding protein 1                                                  | -0.74 | 3.4E-04 | 1.4E-03 |
| 2353237 | <b>VANGL1</b>     | vang-like 1 (van gogh, Drosophila)                                                        | -0.74 | 2.3E-05 | 1.8E-04 |
| 3447694 | <b>BCAT1</b>      | branched chain amino-acid transaminase 1, cytosolic                                       | -0.74 | 3.3E-04 | 1.4E-03 |
| 3863811 | <b>PSG6</b>       | pregnancy specific beta-1-glycoprotein 6                                                  | -0.74 | 2.0E-03 | 5.9E-03 |
| 2654091 | <b>USP13</b>      | ubiquitin specific peptidase 13 (isopeptidase T-3)                                        | -0.74 | 4.9E-06 | 5.3E-05 |
| 2388794 | <b>ZNF238</b>     | zinc finger protein 238                                                                   | -0.74 | 8.2E-06 | 7.9E-05 |
| 2426951 | <b>PSRC1</b>      | proline/serine-rich coiled-coil 1                                                         | -0.75 | 4.2E-06 | 4.7E-05 |
| 2375784 | <b>NCRNA00260</b> | non-protein coding RNA 260                                                                | -0.75 | 3.7E-05 | 2.6E-04 |
| 3866276 | <b>SLC1A5</b>     | solute carrier family 1 (neutral amino acid transporter), member 5                        | -0.75 | 7.6E-07 | 1.4E-05 |
| 3904594 | <b>C20ORF117</b>  | chromosome 20 open reading frame 117                                                      | -0.75 | 2.3E-06 | 3.1E-05 |
| 2634058 | <b>FAM55C</b>     | family with sequence similarity 55, member C                                              | -0.75 | 4.1E-05 | 2.8E-04 |
| 2844709 | <b>CNOT6</b>      | CCR4-NOT transcription complex, subunit 6                                                 | -0.75 | 4.3E-05 | 2.8E-04 |
| 2884623 | <b>C1QTNF2</b>    | C1q and tumor necrosis factor related protein 2                                           | -0.76 | 8.0E-05 | 4.6E-04 |
| 3850676 | <b>KANK2</b>      | KN motif and ankyrin repeat domains 2                                                     | -0.76 | 2.9E-07 | 6.7E-06 |
| 2924330 | <b>TPD52L1</b>    | tumor protein D52-like 1                                                                  | -0.76 | 2.2E-04 | 1.0E-03 |
| 2542795 | <b>SDC1</b>       | syndecan 1                                                                                | -0.76 | 1.3E-06 | 2.0E-05 |
| 3268669 | <b>BUB3</b>       | budding uninhibited by benzimidazoles 3 homolog (yeast)                                   | -0.76 | 8.4E-07 | 1.5E-05 |
| 2609347 | <b>LMCD1</b>      | LIM and cysteine-rich domains 1                                                           | -0.76 | 3.9E-05 | 2.6E-04 |
| 3960685 | <b>DMC1</b>       | DMC1 dosage suppressor of mck1 homolog, meiosis-specific homologous recombination (yeast) | -0.76 | 1.1E-05 | 9.6E-05 |
| 3080283 | <b>XRCC2</b>      | X-ray repair complementing defective repair in Chinese hamster cells 2                    | -0.76 | 7.0E-04 | 2.5E-03 |
| 3015442 | <b>PILRB</b>      | paired immunoglobulin-like type 2 receptor beta                                           | -0.76 | 1.8E-06 | 2.5E-05 |
| 3168255 | <b>HRCT1</b>      | histidine rich carboxyl terminus 1                                                        | -0.76 | 2.9E-05 | 2.1E-04 |
| 2371547 | <b>C1ORF21</b>    | chromosome 1 open reading frame 21                                                        | -0.76 | 1.5E-05 | 1.3E-04 |
| 2684851 | <b>VGLL3</b>      | vestigial like 3 (Drosophila)                                                             | -0.76 | 3.6E-03 | 9.3E-03 |
| 3770699 | <b>MIF4GD</b>     | MIF4G domain containing                                                                   | -0.76 | 3.9E-07 | 8.4E-06 |
| 2836451 | <b>MFAP3</b>      | microfibrillar-associated protein 3                                                       | -0.76 | 2.2E-04 | 1.0E-03 |
| 3757917 | <b>PTRF</b>       | polymerase I and transcript release factor                                                | -0.76 | 4.3E-08 | 1.8E-06 |
| 2352758 | <b>HIPK1</b>      | homeodomain interacting protein kinase 1                                                  | -0.76 | 3.8E-06 | 4.4E-05 |
| 2444451 | <b>CENPL</b>      | centromere protein L                                                                      | -0.76 | 4.3E-06 | 4.8E-05 |
| 2796484 | <b>CASP3</b>      | caspase 3, apoptosis-related cysteine peptidase                                           | -0.76 | 1.8E-05 | 1.5E-04 |
| 3976797 | <b>SUV39H1</b>    | suppressor of variegation 3-9 homolog 1 (Drosophila)                                      | -0.76 | 2.7E-04 | 1.2E-03 |
| 3414846 | <b>DAZAP2</b>     | DAZ associated protein 2                                                                  | -0.77 | 1.8E-07 | 4.8E-06 |
| 2786567 | <b>C4ORF49</b>    | chromosome 4 open reading frame 49                                                        | -0.77 | 2.4E-06 | 3.2E-05 |
| 3764738 | <b>SKA2</b>       | spindle and kinetochore associated complex subunit 2                                      | -0.77 | 7.9E-06 | 7.7E-05 |
| 3625761 | <b>MNS1</b>       | meiosis-specific nuclear structural 1                                                     | -0.77 | 9.5E-05 | 5.2E-04 |
| 3901851 | <b>ABHD12</b>     | abhydrolase domain containing 12                                                          | -0.77 | 1.9E-06 | 2.7E-05 |
| 3167553 | <b>IL11RA</b>     | interleukin 11 receptor, alpha                                                            | -0.77 | 2.1E-07 | 5.3E-06 |
| 3465248 | <b>LUM</b>        | lumican                                                                                   | -0.77 | 8.1E-04 | 2.8E-03 |
| 3658925 | <b>ORC6</b>       | origin recognition complex, subunit 6                                                     | -0.77 | 2.0E-07 | 5.2E-06 |
| 3562746 | <b>C14ORF106</b>  | chromosome 14 open reading frame 106                                                      | -0.77 | 5.5E-05 | 3.5E-04 |
| 3726691 | <b>ABCC3</b>      | ATP-binding cassette, sub-family C (CFTR/MRP), member 3                                   | -0.77 | 2.2E-08 | 1.1E-06 |

|         |                 |                                                                          |       |         |         |
|---------|-----------------|--------------------------------------------------------------------------|-------|---------|---------|
| 3007438 | <b>POM121</b>   | POM121 membrane glycoprotein                                             | -0.77 | 1.8E-02 | 3.4E-02 |
| 2944068 | <b>DEK</b>      | DEK oncogene                                                             | -0.78 | 2.7E-04 | 1.2E-03 |
| 2366422 | <b>ATP1B1</b>   | ATPase, Na <sup>+</sup> /K <sup>+</sup> transporting, beta 1 polypeptide | -0.78 | 1.0E-05 | 9.4E-05 |
| 3907111 | <b>TOMM34</b>   | translocase of outer mitochondrial membrane 34                           | -0.78 | 6.8E-08 | 2.4E-06 |
| 3074857 | <b>PTN</b>      | pleiotrophin                                                             | -0.78 | 3.7E-04 | 1.6E-03 |
| 2591643 | <b>COL5A2</b>   | collagen, type V, alpha 2                                                | -0.78 | 6.6E-05 | 4.0E-04 |
| 3628498 | <b>CA12</b>     | carbonic anhydrase XII                                                   | -0.78 | 1.6E-06 | 2.3E-05 |
| 2514122 | <b>LASS6</b>    | LAG1 homolog, ceramide synthase 6                                        | -0.78 | 1.1E-05 | 9.7E-05 |
| 2857416 | <b>IL6ST</b>    | interleukin 6 signal transducer (gp130, oncostatin M receptor)           | -0.78 | 7.3E-04 | 2.6E-03 |
| 2334319 | <b>TOE1</b>     | target of EGR1, member 1 (nuclear)                                       | -0.79 | 3.5E-06 | 4.1E-05 |
| 2757319 | <b>SLBP</b>     | stem-loop binding protein                                                | -0.79 | 1.8E-05 | 1.4E-04 |
| 2829947 | <b>TGFB1</b>    | transforming growth factor, beta-induced, 68kDa                          | -0.79 | 9.8E-08 | 3.1E-06 |
| 3103293 | <b>RDH10</b>    | retinol dehydrogenase 10 (all-trans)                                     | -0.79 | 2.1E-05 | 1.6E-04 |
| 3854218 | <b>HAUS8</b>    | HAUS augmin-like complex, subunit 8                                      | -0.79 | 1.8E-04 | 8.6E-04 |
| 2836242 | <b>GRIA1</b>    | glutamate receptor, ionotropic, AMPA 1                                   | -0.79 | 2.7E-06 | 3.5E-05 |
| 3415668 | <b>TENC1</b>    | tensin like C1 domain containing phosphatase (tensin 2)                  | -0.79 | 9.3E-08 | 3.0E-06 |
| 2533493 | <b>SH3BP4</b>   | SH3-domain binding protein 4                                             | -0.79 | 2.1E-08 | 1.1E-06 |
| 2429261 | <b>NRAS</b>     | neuroblastoma RAS viral (v-ras) oncogene homolog                         | -0.80 | 4.8E-06 | 5.2E-05 |
| 3318967 | <b>OR10A2</b>   | olfactory receptor, family 10, subfamily A, member 2                     | -0.80 | 1.2E-02 | 2.4E-02 |
| 3722770 | <b>C17ORF53</b> | chromosome 17 open reading frame 53                                      | -0.80 | 2.8E-06 | 3.5E-05 |
| 3923218 | <b>RRP1B</b>    | ribosomal RNA processing 1 homolog B ( <i>S. cerevisiae</i> )            | -0.80 | 8.0E-07 | 1.4E-05 |
| 2779486 | <b>H2AFZ</b>    | H2A histone family, member Z                                             | -0.80 | 2.1E-07 | 5.3E-06 |
| 3599709 | <b>GLCE</b>     | glucuronic acid epimerase                                                | -0.80 | 2.7E-05 | 2.0E-04 |
| 3677315 | <b>PKMYT1</b>   | protein kinase, membrane associated tyrosine/threonine 1                 | -0.81 | 1.0E-06 | 1.7E-05 |
| 2904663 | <b>FANCE</b>    | Fanconi anemia, complementation group E                                  | -0.81 | 4.2E-06 | 4.7E-05 |
| 3168385 | <b>GLIPR2</b>   | GLI pathogenesis-related 2                                               | -0.81 | 1.1E-07 | 3.4E-06 |
| 3766621 | <b>ICAM2</b>    | intercellular adhesion molecule 2                                        | -0.81 | 3.6E-06 | 4.2E-05 |
| 2429466 | <b>NGF</b>      | nerve growth factor (beta polypeptide)                                   | -0.81 | 1.1E-05 | 1.0E-04 |
| 2852274 | <b>MTMR12</b>   | myotubularin related protein 12                                          | -0.82 | 3.8E-06 | 4.4E-05 |
| 2719617 | <b>BST1</b>     | bone marrow stromal cell antigen 1                                       | -0.82 | 7.7E-07 | 1.4E-05 |
| 3557791 | <b>FAM158A</b>  | family with sequence similarity 158, member A                            | -0.82 | 2.0E-06 | 2.8E-05 |
| 2340819 | <b>TCTEX1D1</b> | Tctex1 domain containing 1                                               | -0.82 | 3.0E-05 | 2.2E-04 |
| 3403168 | <b>C1S</b>      | complement component 1, s subcomponent                                   | -0.82 | 7.0E-06 | 7.0E-05 |
| 3327906 | <b>API5</b>     | apoptosis inhibitor 5                                                    | -0.82 | 1.1E-05 | 1.0E-04 |
| 2334646 | <b>RAD54L</b>   | RAD54-like ( <i>S. cerevisiae</i> )                                      | -0.82 | 5.1E-05 | 3.2E-04 |
| 3318009 | <b>RRM1</b>     | ribonucleotide reductase M1                                              | -0.83 | 7.3E-06 | 7.2E-05 |
| 4000944 | <b>RBBP7</b>    | retinoblastoma binding protein 7                                         | -0.83 | 2.2E-07 | 5.5E-06 |
| 2905069 | <b>KCTD20</b>   | potassium channel tetramerisation domain containing 20                   | -0.83 | 2.6E-05 | 1.9E-04 |
| 3593147 | <b>DUT</b>      | deoxyuridine triphosphatase                                              | -0.83 | 2.3E-05 | 1.8E-04 |
| 3279058 | <b>ACBD7</b>    | acyl-CoA binding domain containing 7                                     | -0.83 | 4.3E-05 | 2.8E-04 |
| 3708074 | <b>XAF1</b>     | XIAP associated factor 1                                                 | -0.83 | 3.7E-05 | 2.5E-04 |
| 2324341 | <b>NBPF3</b>    | neuroblastoma breakpoint family, member 3                                | -0.83 | 2.5E-06 | 3.3E-05 |
| 3308489 | <b>KIAA1598</b> | KIAA1598                                                                 | -0.83 | 5.0E-05 | 3.2E-04 |
| 3056414 | <b>RFC2</b>     | replication factor C (activator 1) 2, 40kDa                              | -0.83 | 4.0E-05 | 2.7E-04 |
| 3634811 | <b>CTSH</b>     | cathepsin H                                                              | -0.83 | 6.3E-06 | 6.5E-05 |
| 2953852 | <b>MED20</b>    | mediator complex subunit 20                                              | -0.83 | 4.3E-05 | 2.8E-04 |
| 3413278 | <b>TMEM106C</b> | transmembrane protein 106C                                               | -0.84 | 1.9E-06 | 2.7E-05 |
| 3748798 | <b>MFAP4</b>    | microfibrillar-associated protein 4                                      | -0.84 | 2.4E-08 | 1.2E-06 |
| 3012019 | <b>CLDN12</b>   | claudin 12                                                               | -0.84 | 5.1E-05 | 3.2E-04 |
| 3995633 | <b>BGN</b>      | biglycan                                                                 | -0.84 | 1.4E-07 | 4.0E-06 |
| 3907234 | <b>SDC4</b>     | syndecan 4                                                               | -0.84 | 3.8E-08 | 1.6E-06 |
| 2674808 | <b>TRAF1</b>    | TRAF interacting protein                                                 | -0.84 | 1.4E-05 | 1.2E-04 |
| 3060245 | <b>SLC25A40</b> | solute carrier family 25, member 40                                      | -0.84 | 3.4E-05 | 2.4E-04 |
| 2907671 | <b>PTK7</b>     | PTK7 protein tyrosine kinase 7                                           | -0.84 | 9.9E-09 | 6.5E-07 |
| 3645477 | <b>PAQR4</b>    | progesterin and adipoQ receptor family member IV                         | -0.84 | 5.0E-05 | 3.2E-04 |
| 2549565 | <b>SLC8A1</b>   | solute carrier family 8 (sodium/calcium exchanger), member 1             | -0.84 | 3.4E-05 | 2.4E-04 |
| 3724197 | <b>NSF</b>      | N-ethylmaleimide-sensitive factor                                        | -0.85 | 2.7E-07 | 6.3E-06 |
| 3576284 | <b>RPS6KA5</b>  | ribosomal protein S6 kinase, 90kDa, polypeptide 5                        | -0.85 | 4.3E-06 | 4.8E-05 |
| 3862273 | <b>PRR13</b>    | proline rich 13                                                          | -0.85 | 2.0E-05 | 1.6E-04 |
| 3476012 | <b>MPHOSPH9</b> | M-phase phosphoprotein 9                                                 | -0.85 | 5.4E-05 | 3.4E-04 |
| 2330075 | <b>EIF2C1</b>   | eukaryotic translation initiation factor 2C, 1                           | -0.85 | 3.8E-06 | 4.4E-05 |
| 3723071 | <b>DBF4B</b>    | DBF4 homolog B ( <i>S. cerevisiae</i> )                                  | -0.85 | 9.9E-07 | 1.7E-05 |
| 2412799 | <b>ORC1</b>     | origin recognition complex, subunit 1                                    | -0.86 | 5.5E-05 | 3.5E-04 |
| 3903146 | <b>E2F1</b>     | E2F transcription factor 1                                               | -0.86 | 7.3E-06 | 7.3E-05 |
| 2950277 | <b>HLA-DMA</b>  | major histocompatibility complex, class II, DM alpha                     | -0.86 | 4.0E-07 | 8.4E-06 |
| 3548152 | <b>TDP1</b>     | tyrosyl-DNA phosphodiesterase 1                                          | -0.86 | 4.3E-07 | 8.8E-06 |
| 2402459 | <b>STMN1</b>    | stathmin 1                                                               | -0.86 | 7.9E-08 | 2.7E-06 |
| 2350922 | <b>GSTM4</b>    | glutathione S-transferase mu 4                                           | -0.87 | 2.0E-06 | 2.8E-05 |
| 3250055 | <b>DDX21</b>    | DEAD (Asp-Glu-Ala-Asp) box polypeptide 21                                | -0.87 | 1.9E-05 | 1.5E-04 |
| 3651018 | <b>CP110</b>    | CP110 protein                                                            | -0.87 | 6.3E-04 | 2.4E-03 |
| 2361154 | <b>SYT11</b>    | synaptotagmin XI                                                         | -0.87 | 1.9E-07 | 5.1E-06 |
| 3226592 | <b>WDR34</b>    | WD repeat domain 34                                                      | -0.87 | 1.9E-06 | 2.7E-05 |
| 2327482 | <b>RCC1</b>     | regulator of chromosome condensation 1                                   | -0.88 | 3.4E-06 | 4.0E-05 |

|         |                     |                                                                                                                                                  |       |         |         |
|---------|---------------------|--------------------------------------------------------------------------------------------------------------------------------------------------|-------|---------|---------|
| 3149843 | <b>RAD21</b>        | RAD21 homolog ( <i>S. pombe</i> )                                                                                                                | -0.88 | 3.0E-06 | 3.7E-05 |
| 3274758 | <b>AKR1C2</b>       | aldo-keto reductase family 1, member C2 (dihydrodiol dehydrogenase 2; bile acid binding protein; 3-alpha hydroxysteroid dehydrogenase, type III) | -0.88 | 2.1E-04 | 9.7E-04 |
| 2750594 | <b>SC4MOL</b>       | sterol-C4-methyl oxidase-like                                                                                                                    | -0.88 | 5.7E-05 | 3.6E-04 |
| 2696309 | <b>AMOTL2</b>       | angiomin like 2                                                                                                                                  | -0.88 | 1.3E-07 | 3.8E-06 |
| 2351004 | <b>GSTM5</b>        | glutathione S-transferase mu 5                                                                                                                   | -0.88 | 1.5E-04 | 7.4E-04 |
| 2529627 | <b>KCNE4</b>        | potassium voltage-gated channel, Isk-related family, member 4                                                                                    | -0.89 | 6.1E-04 | 2.3E-03 |
| 3866898 | <b>LIG1</b>         | ligase I, DNA, ATP-dependent                                                                                                                     | -0.89 | 4.0E-06 | 4.5E-05 |
| 3261923 | <b>AS3MT</b>        | arsenic (+3 oxidation state) methyltransferase                                                                                                   | -0.89 | 4.1E-05 | 2.7E-04 |
| 2353773 | <b>TTF2</b>         | transcription termination factor, RNA polymerase II                                                                                              | -0.89 | 4.5E-06 | 5.0E-05 |
| 3556966 | <b>HAUS4</b>        | HAUS augmin-like complex, subunit 4                                                                                                              | -0.89 | 3.4E-06 | 4.0E-05 |
| 3318390 | <b>TRIM6-TRIM34</b> | TRIM6-TRIM34 readthrough                                                                                                                         | -0.89 | 8.7E-08 | 2.9E-06 |
| 3427352 | <b>NEDD1</b>        | neural precursor cell expressed, developmentally down-regulated 1                                                                                | -0.89 | 2.6E-04 | 1.2E-03 |
| 4012142 | <b>ERCC6L</b>       | excision repair cross-complementing rodent repair deficiency, complementation group 6-like                                                       | -0.89 | 9.6E-07 | 1.6E-05 |
| 3340161 | <b>PPME1</b>        | protein phosphatase methylesterase 1                                                                                                             | -0.89 | 1.1E-08 | 7.0E-07 |
| 2471316 | <b>GEN1</b>         | Gen homolog 1, endonuclease ( <i>Drosophila</i> )                                                                                                | -0.90 | 1.1E-04 | 5.8E-04 |
| 2697721 | <b>PRR23C</b>       | proline rich 23C                                                                                                                                 | -0.90 | 9.9E-04 | 3.3E-03 |
| 3439178 | <b>PXMP2</b>        | peroxisomal membrane protein 2, 22kDa                                                                                                            | -0.90 | 1.1E-06 | 1.8E-05 |
| 3435362 | <b>KNTC1</b>        | kinetochore associated 1                                                                                                                         | -0.90 | 8.3E-06 | 7.9E-05 |
| 3831062 | <b>WDR62</b>        | WD repeat domain 62                                                                                                                              | -0.90 | 3.2E-06 | 3.9E-05 |
| 4009238 | <b>SMC1A</b>        | structural maintenance of chromosomes 1A                                                                                                         | -0.91 | 3.7E-06 | 4.3E-05 |
| 3394183 | <b>H2AFX</b>        | H2A histone family, member X                                                                                                                     | -0.91 | 4.5E-07 | 9.2E-06 |
| 3479181 | <b>POLE</b>         | polymerase (DNA directed), epsilon                                                                                                               | -0.91 | 1.0E-05 | 9.3E-05 |
| 2951567 | <b>FKBP5</b>        | FK506 binding protein 5                                                                                                                          | -0.91 | 1.3E-06 | 2.0E-05 |
| 3852691 | <b>DDX39</b>        | DEAD (Asp-Glu-Ala-Asp) box polypeptide 39                                                                                                        | -0.91 | 7.9E-06 | 7.7E-05 |
| 3340269 | <b>POLD3</b>        | polymerase (DNA-directed), delta 3, accessory subunit                                                                                            | -0.91 | 2.9E-05 | 2.1E-04 |
| 3558118 | <b>DHRS1</b>        | dehydrogenase/reductase (SDR family) member 1                                                                                                    | -0.91 | 1.2E-07 | 3.5E-06 |
| 3565206 | <b>BMP4</b>         | bone morphogenetic protein 4                                                                                                                     | -0.91 | 5.2E-08 | 2.0E-06 |
| 3414885 | <b>SLC4A8</b>       | solute carrier family 4, sodium bicarbonate cotransporter, member 8                                                                              | -0.91 | 1.3E-07 | 3.8E-06 |
| 3192912 | <b>C9ORF96</b>      | chromosome 9 open reading frame 96                                                                                                               | -0.92 | 1.5E-04 | 7.4E-04 |
| 2902844 | <b>CFB</b>          | complement factor B                                                                                                                              | -0.92 | 2.1E-07 | 5.3E-06 |
| 3333358 | <b>INCENP</b>       | inner centromere protein antigens 135/155kDa                                                                                                     | -0.92 | 4.2E-06 | 4.7E-05 |
| 2840002 | <b>CCDC99</b>       | coiled-coil domain containing 99                                                                                                                 | -0.92 | 3.8E-05 | 2.6E-04 |
| 3716664 | <b>SUZ12P</b>       | suppressor of zeste 12 homolog pseudogene                                                                                                        | -0.92 | 8.7E-06 | 8.2E-05 |
| 3573994 | <b>C14ORF145</b>    | chromosome 14 open reading frame 145                                                                                                             | -0.92 | 1.1E-05 | 9.8E-05 |
| 3050367 | <b>FIGL1</b>        | figletin-like 1                                                                                                                                  | -0.92 | 3.8E-05 | 2.6E-04 |
| 2441043 | <b>OLFML2B</b>      | olfactomedin-like 2B                                                                                                                             | -0.92 | 2.1E-07 | 5.3E-06 |
| 2330687 | <b>ZC3H12A</b>      | zinc finger CCCH-type containing 12A                                                                                                             | -0.92 | 3.1E-06 | 3.8E-05 |
| 3204692 | <b>C9ORF100</b>     | chromosome 9 open reading frame 100                                                                                                              | -0.93 | 4.0E-07 | 8.4E-06 |
| 3601348 | <b>LOXL1</b>        | lysyl oxidase-like 1                                                                                                                             | -0.93 | 4.3E-08 | 1.7E-06 |
| 7385547 | <b>CCL2</b>         | chemokine (C-C motif) ligand 2                                                                                                                   | -0.93 | 5.5E-06 | 5.8E-05 |
| 3550485 | <b>VRK1</b>         | vaccinia related kinase 1                                                                                                                        | -0.93 | 6.8E-07 | 1.3E-05 |
| 3417146 | <b>CDK2</b>         | cyclin-dependent kinase 2                                                                                                                        | -0.93 | 7.8E-07 | 1.4E-05 |
| 3415576 | <b>KRT18</b>        | keratin 18                                                                                                                                       | -0.93 | 1.6E-06 | 2.3E-05 |
| 2334404 | <b>NASP</b>         | nuclear autoantigenic sperm protein (histone-binding)                                                                                            | -0.93 | 2.8E-07 | 6.4E-06 |
| 3258910 | <b>HELLS</b>        | helicase, lymphoid-specific                                                                                                                      | -0.93 | 1.9E-05 | 1.5E-04 |
| 2966587 | <b>SIM1</b>         | single-minded homolog 1 ( <i>Drosophila</i> )                                                                                                    | -0.94 | 3.1E-05 | 2.2E-04 |
| 2402416 | <b>C1ORF135</b>     | chromosome 1 open reading frame 135                                                                                                              | -0.94 | 6.3E-05 | 3.8E-04 |
| 4000370 | <b>FANCB</b>        | Fanconi anemia, complementation group B                                                                                                          | -0.94 | 1.4E-06 | 2.1E-05 |
| 3598721 | <b>ZWILCH</b>       | Zwilch, kinetochore associated, homolog ( <i>Drosophila</i> )                                                                                    | -0.94 | 2.2E-06 | 3.0E-05 |
| 2516023 | <b>CDCA7</b>        | cell division cycle associated 7                                                                                                                 | -0.95 | 2.9E-07 | 6.6E-06 |
| 2384268 | <b>HIST3H2BB</b>    | histone cluster 3, H2bb                                                                                                                          | -0.95 | 9.1E-05 | 5.1E-04 |
| 2587961 | <b>CHN1</b>         | chimerin (chimaerin) 1                                                                                                                           | -0.96 | 8.0E-07 | 1.4E-05 |
| 2948547 | <b>NRM</b>          | nurim (nuclear envelope membrane protein)                                                                                                        | -0.96 | 7.7E-07 | 1.4E-05 |
| 3850660 | <b>SPC24</b>        | SPC24, NDC80 kinetochore complex component, homolog ( <i>S. cerevisiae</i> )                                                                     | -0.96 | 4.4E-06 | 4.9E-05 |
| 3399545 | <b>NCAPD3</b>       | non-SMC condensin II complex, subunit D3                                                                                                         | -0.96 | 2.1E-06 | 2.9E-05 |
| 2948630 | <b>IER3</b>         | immediate early response 3                                                                                                                       | -0.96 | 5.1E-07 | 1.0E-05 |
| 3758317 | <b>BRCA1</b>        | breast cancer 1, early onset                                                                                                                     | -0.96 | 3.0E-06 | 3.7E-05 |
| 4019900 | <b>CUL4B</b>        | cullin 4B                                                                                                                                        | -0.96 | 1.9E-06 | 2.7E-05 |
| 3905145 | <b>TGM2</b>         | transglutaminase 2 (C polypeptide, protein-glutamine-gamma-glutamyl-transferase)                                                                 | -0.97 | 7.7E-07 | 1.4E-05 |
| 3443226 | <b>MFAP5</b>        | microfibrillar associated protein 5                                                                                                              | -0.97 | 3.4E-07 | 7.5E-06 |
| 3827218 | <b>RPSAP58</b>      | ribosomal protein SA pseudogene 58                                                                                                               | -0.97 | 3.3E-03 | 8.7E-03 |
| 3468743 | <b>NT5DC3</b>       | 5'-nucleotidase domain containing 3                                                                                                              | -0.97 | 4.0E-07 | 8.4E-06 |
| 2625907 | <b>FLNB</b>         | filamin B, beta                                                                                                                                  | -0.97 | 4.0E-08 | 1.7E-06 |
| 2373693 | <b>LHX9</b>         | LIM homeobox 9                                                                                                                                   | -0.97 | 8.3E-08 | 2.8E-06 |
| 2911413 | <b>PRIM2</b>        | primase, DNA, polypeptide 2 (58kDa)                                                                                                              | -0.98 | 2.1E-07 | 5.3E-06 |
| 2369339 | <b>RALGPS2</b>      | Ral GEF with PH domain and SH3 binding motif 2                                                                                                   | -0.98 | 1.9E-05 | 1.5E-04 |
| 2946324 | <b>HIST1H3D</b>     | histone cluster 1, H3d                                                                                                                           | -0.98 | 3.4E-06 | 4.0E-05 |
| 3013255 | <b>PEG10</b>        | paternally expressed 10                                                                                                                          | -0.98 | 1.1E-05 | 9.6E-05 |
| 3362852 | <b>MRV11</b>        | murine retrovirus integration site 1 homolog                                                                                                     | -0.98 | 2.9E-06 | 3.6E-05 |
| 3850069 | <b>DNMT1</b>        | DNA (cytosine-5)-methyltransferase 1                                                                                                             | -0.98 | 8.2E-08 | 2.8E-06 |

|         |                     |                                                                                                 |       |         |         |
|---------|---------------------|-------------------------------------------------------------------------------------------------|-------|---------|---------|
| 2732844 | <b>ANXA3</b>        | annexin A3                                                                                      | -0.99 | 8.5E-07 | 1.5E-05 |
| 3875195 | <b>MCM8</b>         | minichromosome maintenance complex component 8                                                  | -0.99 | 2.2E-05 | 1.7E-04 |
| 2888674 | <b>MXD3</b>         | MAX dimerization protein 3                                                                      | -0.99 | 5.5E-07 | 1.1E-05 |
| 3970476 | <b>SCML1</b>        | sex comb on midleg-like 1 (Drosophila)                                                          | -1.00 | 7.1E-06 | 7.1E-05 |
| 3127334 | <b>REEP4</b>        | receptor accessory protein 4                                                                    | -1.00 | 7.0E-07 | 1.3E-05 |
| 3748400 | <b>USP6</b>         | ubiquitin specific peptidase 6 (Tre-2 oncogene)                                                 | -1.00 | 7.7E-03 | 1.7E-02 |
| 3410614 | <b>FGD4</b>         | FYVE, RhoGEF and PH domain containing 4                                                         | -1.01 | 4.6E-06 | 5.0E-05 |
| 3904747 | <b>RBL1</b>         | retinoblastoma-like 1 (p107)                                                                    | -1.01 | 4.8E-06 | 5.2E-05 |
| 2743315 | <b>PHF17</b>        | PHD finger protein 17                                                                           | -1.01 | 9.1E-08 | 3.0E-06 |
| 3556990 | <b>JUB</b>          | jub, ajuba homolog (Xenopus laevis)                                                             | -1.01 | 1.5E-08 | 8.8E-07 |
| 3607698 | <b>C15ORF42</b>     | chromosome 15 open reading frame 42                                                             | -1.02 | 2.4E-07 | 5.9E-06 |
| 3204463 | <b>FANCG</b>        | Fanconi anemia, complementation group G                                                         | -1.02 | 4.0E-06 | 4.5E-05 |
| 3137875 | <b>GGH</b>          | gamma-glutamyl hydrolase (conjugase, folylpolygammaglutamyl hydrolase)                          | -1.02 | 4.3E-06 | 4.8E-05 |
| 2364155 | <b>UHMK1</b>        | U2AF homology motif (UHM) kinase 1                                                              | -1.02 | 6.6E-06 | 6.7E-05 |
| 2458338 | <b>ENAH</b>         | enabled homolog (Drosophila)                                                                    | -1.02 | 2.1E-05 | 1.6E-04 |
| 3097152 | <b>MCM4</b>         | minichromosome maintenance complex component 4                                                  | -1.02 | 4.5E-07 | 9.2E-06 |
| 3293724 | <b>C10ORF54</b>     | chromosome 10 open reading frame 54                                                             | -1.02 | 5.7E-06 | 5.9E-05 |
| 2709486 | <b>RFC4</b>         | replication factor C (activator 1) 4, 37kDa                                                     | -1.02 | 1.4E-06 | 2.1E-05 |
| 2584134 | <b>FAP</b>          | fibroblast activation protein, alpha                                                            | -1.03 | 8.7E-05 | 4.9E-04 |
| 3760268 | <b>ARL17A</b>       | ADP-ribosylation factor-like 17A                                                                | -1.03 | 1.0E-03 | 3.4E-03 |
| 3335029 | <b>POLA2</b>        | polymerase (DNA directed), alpha 2 (70kD subunit)                                               | -1.03 | 7.8E-06 | 7.7E-05 |
| 2548617 | <b>CDC42EP3</b>     | CDC42 effector protein (Rho GTPase binding) 3                                                   | -1.03 | 8.2E-07 | 1.4E-05 |
| 3145107 | <b>CNE2</b>         | cyclin E2                                                                                       | -1.04 | 8.0E-05 | 4.6E-04 |
| 3383227 | <b>GAB2</b>         | GRB2-associated binding protein 2                                                               | -1.04 | 1.2E-08 | 7.4E-07 |
| 3240012 | <b>MASTL</b>        | microtubule associated serine/threonine kinase-like                                             | -1.04 | 2.5E-07 | 6.1E-06 |
| 2571510 | <b>IL1B</b>         | interleukin 1, beta                                                                             | -1.04 | 1.8E-03 | 5.3E-03 |
| 3770632 | <b>SUMO2</b>        | SMT3 suppressor of mif two 3 homolog 2 (S. cerevisiae)                                          | -1.05 | 1.4E-05 | 1.2E-04 |
| 3203935 | <b>KIF24</b>        | kinesin family member 24                                                                        | -1.05 | 1.1E-06 | 1.8E-05 |
| 2522916 | <b>CDK15</b>        | cyclin-dependent kinase 15                                                                      | -1.05 | 9.2E-07 | 1.6E-05 |
| 2477203 | <b>VIT</b>          | vitron                                                                                          | -1.05 | 1.8E-06 | 2.6E-05 |
| 3299504 | <b>ACTA2</b>        | actin, alpha 2, smooth muscle, aorta                                                            | -1.05 | 4.0E-08 | 1.7E-06 |
| 2622696 | <b>SEMA3B</b>       | sema domain, immunoglobulin domain (Ig), short basic domain, secreted, (semaphorin) 3B          | -1.05 | 2.3E-06 | 3.1E-05 |
| 3154185 | <b>TMEM71</b>       | transmembrane protein 71                                                                        | -1.05 | 1.9E-06 | 2.7E-05 |
| 3367036 | <b>CCDC34</b>       | coiled-coil domain containing 34                                                                | -1.06 | 3.0E-06 | 3.7E-05 |
| 2511432 | <b>GPD2</b>         | glycerol-3-phosphate dehydrogenase 2 (mitochondrial)                                            | -1.06 | 8.3E-07 | 1.5E-05 |
| 2715076 | <b>WHSC1</b>        | Wolf-Hirschhorn syndrome candidate 1                                                            | -1.07 | 1.7E-08 | 9.3E-07 |
| 3920003 | <b>CHAF1B</b>       | chromatin assembly factor 1, subunit B (p60)                                                    | -1.07 | 5.1E-06 | 5.5E-05 |
| 2813442 | <b>CENPH</b>        | centromere protein H                                                                            | -1.07 | 2.3E-09 | 2.6E-07 |
| 3354210 | <b>SPA17</b>        | sperm autoantigenic protein 17                                                                  | -1.08 | 4.2E-06 | 4.7E-05 |
| 3059667 | <b>SEMA3D</b>       | sema domain, immunoglobulin domain (Ig), short basic domain, secreted, (semaphorin) 3D          | -1.08 | 6.4E-03 | 1.5E-02 |
| 3302187 | <b>ARHGAP19</b>     | Rho GTPase activating protein 19                                                                | -1.08 | 1.7E-06 | 2.5E-05 |
| 3415320 | <b>KRT7</b>         | keratin 7                                                                                       | -1.08 | 1.5E-05 | 1.3E-04 |
| 2649367 | <b>PTX3</b>         | pentraxin 3, long                                                                               | -1.08 | 2.2E-06 | 3.0E-05 |
| 3817602 | <b>TNFAIP8L1</b>    | tumor necrosis factor, alpha-induced protein 8-like 1                                           | -1.08 | 2.7E-05 | 2.0E-04 |
| 3484497 | <b>FRY</b>          | furry homolog (Drosophila)                                                                      | -1.09 | 1.2E-05 | 1.0E-04 |
| 3405515 | <b>APOLD1</b>       | apolipoprotein L domain containing 1                                                            | -1.09 | 5.9E-07 | 1.1E-05 |
| 2634027 | <b>CEP97</b>        | centrosomal protein 97kDa                                                                       | -1.09 | 1.2E-05 | 1.1E-04 |
| 3880827 | <b>GINS1</b>        | GINS complex subunit 1 (Psf1 homolog)                                                           | -1.10 | 6.0E-08 | 2.2E-06 |
| 3333226 | <b>FEN1</b>         | flap structure-specific endonuclease 1                                                          | -1.10 | 5.2E-07 | 1.0E-05 |
| 2518272 | <b>ITGA4</b>        | integrin, alpha 4 (antigen CD49D, alpha 4 subunit of VLA-4 receptor)                            | -1.10 | 7.9E-05 | 4.6E-04 |
| 3329983 | <b>PTPRJ</b>        | protein tyrosine phosphatase, receptor type, J                                                  | -1.10 | 2.2E-07 | 5.5E-06 |
| 2339414 | <b>USP1</b>         | ubiquitin specific peptidase 1                                                                  | -1.11 | 6.0E-05 | 3.7E-04 |
| 3715489 | <b>TMEM97</b>       | transmembrane protein 97                                                                        | -1.11 | 2.1E-07 | 5.3E-06 |
| 3403015 | <b>ENO2</b>         | enolase 2 (gamma, neuronal)                                                                     | -1.12 | 3.7E-07 | 8.1E-06 |
| 2802681 | <b>LOC100133299</b> | <b>GAL11870</b>                                                                                 | -1.12 | 7.7E-04 | 2.7E-03 |
| 2565902 | <b>ANKRD36B</b>     | ankyrin repeat domain 36B                                                                       | -1.14 | 1.3E-02 | 2.6E-02 |
| 3972093 | <b>POLA1</b>        | polymerase (DNA directed), alpha 1, catalytic subunit                                           | -1.14 | 4.5E-06 | 4.9E-05 |
| 3530982 | <b>G2E3</b>         | G2/M-phase specific E3 ubiquitin protein ligase                                                 | -1.14 | 1.4E-06 | 2.1E-05 |
| 2898597 | <b>GMNN</b>         | geminin, DNA replication inhibitor                                                              | -1.14 | 1.1E-07 | 3.4E-06 |
| 3464967 | <b>GALNT4</b>       | UDP-N-acetyl-alpha-D-galactosamine:polypeptide N-acetylgalactosaminyl-transferase 4 (GalNAc-T4) | -1.15 | 2.3E-07 | 5.6E-06 |
| 3563395 | <b>POLE2</b>        | polymerase (DNA directed), epsilon 2 (p59 subunit)                                              | -1.15 | 3.9E-07 | 8.4E-06 |
| 2957126 | <b>MCM3</b>         | minichromosome maintenance complex component 3                                                  | -1.15 | 7.1E-06 | 7.1E-05 |
| 2584787 | <b>COBLL1</b>       | COBL-like 1                                                                                     | -1.16 | 1.4E-05 | 1.2E-04 |
| 2652675 | <b>ECT2</b>         | epithelial cell transforming sequence 2 oncogene                                                | -1.16 | 5.1E-06 | 5.5E-05 |
| 2720584 | <b>SLIT2</b>        | slit homolog 2 (Drosophila)                                                                     | -1.16 | 2.9E-07 | 6.7E-06 |
| 2783715 | <b>MAD2L1</b>       | MAD2 mitotic arrest deficient-like 1 (yeast)                                                    | -1.16 | 3.2E-06 | 3.9E-05 |
| 2899171 | <b>HIST1H1E</b>     | histone cluster 1, H1e                                                                          | -1.16 | 3.5E-08 | 1.5E-06 |
| 3257246 | <b>IFIT1</b>        | interferon-induced protein with tetratricopeptide repeats 1                                     | -1.16 | 3.0E-07 | 6.8E-06 |
| 2406420 | <b>CLSPN</b>        | claspin                                                                                         | -1.17 | 8.1E-06 | 7.8E-05 |

|         |                  |                                                                   |       |         |         |
|---------|------------------|-------------------------------------------------------------------|-------|---------|---------|
| 3433747 | <b>RFC5</b>      | replication factor C (activator 1) 5, 36.5kDa                     | -1.17 | 1.1E-06 | 1.8E-05 |
| 3119213 | <b>LY6K</b>      | lymphocyte antigen 6 complex, locus K                             | -1.17 | 2.2E-05 | 1.7E-04 |
| 3311832 | <b>ADAM12</b>    | ADAM metalloproteinase domain 12                                  | -1.18 | 1.0E-07 | 3.2E-06 |
| 3741997 | <b>ANKFY1</b>    | ankyrin repeat and FYVE domain containing 1                       | -1.18 | 2.8E-08 | 1.3E-06 |
| 2947081 | <b>HIST1H4L</b>  | histone cluster 1, H4l                                            | -1.18 | 5.8E-07 | 1.1E-05 |
| 2674762 | <b>UBA7</b>      | ubiquitin-like modifier activating enzyme 7                       | -1.18 | 8.1E-10 | 1.5E-07 |
| 3757970 | <b>PSMC3IP</b>   | PSMC3 interacting protein                                         | -1.19 | 2.9E-07 | 6.7E-06 |
| 3319937 | <b>WEE1</b>      | WEE1 homolog (S. pombe)                                           | -1.19 | 3.3E-09 | 3.2E-07 |
| 3095766 | <b>GINS4</b>     | GINS complex subunit 4 (Sld5 homolog)                             | -1.20 | 4.3E-07 | 8.8E-06 |
| 2947077 | <b>HIST1H3I</b>  | histone cluster 1, H3i                                            | -1.20 | 3.5E-07 | 7.6E-06 |
| 3178583 | <b>CKS2</b>      | CDC28 protein kinase regulatory subunit 2                         | -1.20 | 1.4E-07 | 4.1E-06 |
| 2462160 | <b>NID1</b>      | nidogen 1                                                         | -1.20 | 4.5E-08 | 1.8E-06 |
| 4022781 | <b>FAM122B</b>   | family with sequence similarity 122B                              | -1.20 | 1.3E-06 | 2.0E-05 |
| 2928461 | <b>GPR126</b>    | G protein-coupled receptor 126                                    | -1.21 | 3.8E-06 | 4.3E-05 |
| 3704980 | <b>FANCA</b>     | Fanconi anemia, complementation group A                           | -1.21 | 9.3E-08 | 3.0E-06 |
| 2451043 | <b>LMOD1</b>     | leiomodrin 1 (smooth muscle)                                      | -1.21 | 1.3E-06 | 2.0E-05 |
| 2946353 | <b>HIST1H1D</b>  | histone cluster 1, H1d                                            | -1.21 | 5.5E-06 | 5.8E-05 |
| 2754937 | <b>TLR3</b>      | toll-like receptor 3                                              | -1.21 | 2.0E-06 | 2.8E-05 |
| 2661992 | <b>OXTR</b>      | oxytocin receptor                                                 | -1.22 | 1.1E-06 | 1.8E-05 |
| 3821908 | <b>RNASEH2A</b>  | ribonuclease H2, subunit A                                        | -1.22 | 3.2E-07 | 7.3E-06 |
| 3929775 | <b>DONSON</b>    | downstream neighbor of SON                                        | -1.22 | 9.4E-07 | 1.6E-05 |
| 2425118 | <b>SASS6</b>     | spindle assembly 6 homolog (C. elegans)                           | -1.22 | 4.7E-05 | 3.0E-04 |
| 2510464 | <b>TNFAIP6</b>   | tumor necrosis factor, alpha-induced protein 6                    | -1.22 | 3.5E-06 | 4.2E-05 |
| 3649811 | <b>NDE1</b>      | nudE nuclear distribution gene E homolog 1 (A. nidulans)          | -1.23 | 1.2E-07 | 3.6E-06 |
| 3457824 | <b>TIMELESS</b>  | timeless homolog (Drosophila)                                     | -1.23 | 1.1E-06 | 1.8E-05 |
| 3414739 | <b>METTL7A</b>   | methyltransferase like 7A                                         | -1.23 | 4.3E-09 | 3.8E-07 |
| 3331903 | <b>FAM111B</b>   | family with sequence similarity 111, member B                     | -1.23 | 2.0E-05 | 1.6E-04 |
| 2783207 | <b>PRSS12</b>    | protease, serine, 12 (neurotrypsin, motopsin)                     | -1.24 | 9.5E-08 | 3.0E-06 |
| 3415744 | <b>IGFBP6</b>    | insulin-like growth factor binding protein 6                      | -1.24 | 1.3E-08 | 7.8E-07 |
| 2780172 | <b>CENPE</b>     | centromere protein E, 312kDa                                      | -1.24 | 3.5E-05 | 2.4E-04 |
| 3455261 | <b>KRT81</b>     | keratin 81                                                        | -1.24 | 4.6E-09 | 4.0E-07 |
| 3802602 | <b>CDH2</b>      | cadherin 2, type 1, N-cadherin (neuronal)                         | -1.24 | 2.2E-08 | 1.1E-06 |
| 2326410 | <b>CCDC21</b>    | coiled-coil domain containing 21                                  | -1.24 | 5.7E-07 | 1.1E-05 |
| 3428845 | <b>C12ORF48</b>  | chromosome 12 open reading frame 48                               | -1.25 | 9.9E-09 | 6.5E-07 |
| 3810542 | <b>CCBE1</b>     | collagen and calcium binding EGF domains 1                        | -1.26 | 7.7E-08 | 2.7E-06 |
| 2686458 | <b>ABI3BP</b>    | ABI family, member 3 (NESH) binding protein                       | -1.26 | 6.8E-07 | 1.3E-05 |
| 3817698 | <b>UHRF1</b>     | ubiquitin-like with PHD and ring finger domains 1                 | -1.26 | 4.7E-08 | 1.8E-06 |
| 3944147 | <b>MCM5</b>      | minichromosome maintenance complex component 5                    | -1.27 | 8.1E-07 | 1.4E-05 |
| 3765580 | <b>BRIP1</b>     | BRCA1 interacting protein C-terminal helicase 1                   | -1.27 | 1.4E-06 | 2.1E-05 |
| 2434129 | <b>HIST2H2AB</b> | histone cluster 2, H2ab                                           | -1.27 | 2.8E-06 | 3.6E-05 |
| 2899223 | <b>HIST1H2AE</b> | histone cluster 1, H2ae                                           | -1.27 | 3.9E-06 | 4.5E-05 |
| 3000905 | <b>C7ORF69</b>   | chromosome 7 open reading frame 69                                | -1.27 | 1.2E-06 | 1.9E-05 |
| 2709606 | <b>RPL39L</b>    | ribosomal protein L39-like                                        | -1.27 | 2.5E-07 | 6.0E-06 |
| 3809826 | <b>ATP8B1</b>    | ATPase, aminophospholipid transporter, class I, type 8B, member 1 | -1.28 | 8.3E-08 | 2.8E-06 |
| 2427007 | <b>SORT1</b>     | sortilin 1                                                        | -1.28 | 3.1E-08 | 1.4E-06 |
| 3458133 | <b>PRIM1</b>     | primase, DNA, polypeptide 1 (49kDa)                               | -1.28 | 3.8E-07 | 8.2E-06 |
| 4045643 | <b>S100A16</b>   | S100 calcium binding protein A16                                  | -1.28 | 2.6E-09 | 2.7E-07 |
| 3748323 | <b>SHMT1</b>     | serine hydroxymethyltransferase 1 (soluble)                       | -1.28 | 4.8E-06 | 5.2E-05 |
| 3655628 | <b>KIF22</b>     | kinesin family member 22                                          | -1.29 | 6.2E-07 | 1.2E-05 |
| 3887049 | <b>UBE2C</b>     | ubiquitin-conjugating enzyme E2C                                  | -1.29 | 9.3E-07 | 1.6E-05 |
| 3509411 | <b>MAB21L1</b>   | mab-21-like 1 (C. elegans)                                        | -1.29 | 1.2E-08 | 7.5E-07 |
| 3598959 | <b>SMAD3</b>     | SMAD family member 3                                              | -1.30 | 2.2E-09 | 2.5E-07 |
| 2905404 | <b>PIM1</b>      | pim-1 oncogene                                                    | -1.30 | 2.3E-07 | 5.6E-06 |
| 3168409 | <b>CCIN</b>      | calicin                                                           | -1.30 | 6.5E-06 | 6.6E-05 |
| 3493391 | <b>C13ORF34</b>  | chromosome 13 open reading frame 34                               | -1.30 | 6.2E-08 | 2.3E-06 |
| 2980241 | <b>FBXO5</b>     | F-box protein 5                                                   | -1.30 | 1.1E-06 | 1.8E-05 |
| 2941784 | <b>NEDD9</b>     | neural precursor cell expressed, developmentally down-regulated 9 | -1.31 | 3.1E-09 | 3.1E-07 |
| 2700365 | <b>TM4SF1</b>    | transmembrane 4 L six family member 1                             | -1.31 | 1.9E-06 | 2.7E-05 |
| 2748163 | <b>MND1</b>      | meiotic nuclear divisions 1 homolog (S. cerevisiae)               | -1.32 | 3.1E-05 | 2.2E-04 |
| 2899102 | <b>HIST1H3C</b>  | histone cluster 1, H3c                                            | -1.33 | 1.3E-07 | 3.9E-06 |
| 2413423 | <b>TMEM48</b>    | transmembrane protein 48                                          | -1.33 | 4.8E-08 | 1.9E-06 |
| 2877257 | <b>BRD8</b>      | bromodomain containing 8                                          | -1.33 | 3.3E-08 | 1.4E-06 |
| 2902178 | <b>TCF19</b>     | transcription factor 19                                           | -1.33 | 1.5E-06 | 2.2E-05 |
| 2899768 | <b>HIST1H4I</b>  | histone cluster 1, H4i                                            | -1.34 | 7.2E-06 | 7.1E-05 |
| 2691575 | <b>POLQ</b>      | polymerase (DNA directed), theta                                  | -1.34 | 2.8E-07 | 6.5E-06 |
| 3504691 | <b>ZDHC20</b>    | zinc finger, DHHC-type containing 20                              | -1.34 | 1.9E-07 | 5.1E-06 |
| 2435005 | <b>SELENBP1</b>  | selenium binding protein 1                                        | -1.34 | 5.7E-09 | 4.5E-07 |
| 2946232 | <b>HIST1H1C</b>  | histone cluster 1, H1c                                            | -1.34 | 4.0E-07 | 8.4E-06 |
| 2640855 | <b>MCM2</b>      | minichromosome maintenance complex component 2                    | -1.35 | 5.0E-07 | 9.9E-06 |
| 3499132 | <b>ITGBL1</b>    | integrin, beta-like 1 (with EGF-like repeat domains)              | -1.35 | 2.9E-08 | 1.3E-06 |
| 3235789 | <b>MCM10</b>     | minichromosome maintenance complex component 10                   | -1.35 | 2.7E-07 | 6.3E-06 |
| 2451200 | <b>UBE2T</b>     | ubiquitin-conjugating enzyme E2T (putative)                       | -1.36 | 2.1E-08 | 1.1E-06 |
| 2879166 | <b>FGF1</b>      | fibroblast growth factor 1 (acidic)                               | -1.36 | 7.3E-09 | 5.5E-07 |



|         |                  |                                                                                                                 |       |         |         |
|---------|------------------|-----------------------------------------------------------------------------------------------------------------|-------|---------|---------|
| 3757108 | <b>KRT19</b>     | keratin 19                                                                                                      | -1.37 | 9.6E-07 | 1.6E-05 |
| 2434319 | <b>ANP32E</b>    | acidic (leucine-rich) nuclear phosphoprotein 32 family, member E                                                | -1.37 | 8.5E-06 | 8.1E-05 |
| 2946208 | <b>HIST1H4B</b>  | histone cluster 1, H4b                                                                                          | -1.38 | 1.2E-05 | 1.0E-04 |
| 3608298 | <b>BLM</b>       | Bloom syndrome, RecQ helicase-like                                                                              | -1.38 | 1.5E-07 | 4.1E-06 |
| 3485074 | <b>RFC3</b>      | replication factor C (activator 1) 3, 38kDa                                                                     | -1.38 | 1.5E-08 | 8.4E-07 |
| 2598099 | <b>BARD1</b>     | BRCA1 associated RING domain 1                                                                                  | -1.38 | 4.1E-07 | 8.5E-06 |
| 2945882 | <b>CMAH</b>      | cytidine monophosphate-N-acetylneuraminic acid hydroxylase (CMP-N-acetylneuraminic acid hydroxylase) pseudogene | -1.38 | 2.2E-07 | 5.6E-06 |
| 3257338 | <b>KIF20B</b>    | kinesin family member 20B                                                                                       | -1.38 | 1.3E-06 | 2.0E-05 |
| 2397025 | <b>DHRS3</b>     | dehydrogenase/reductase (SDR family) member 3                                                                   | -1.38 | 1.1E-08 | 6.9E-07 |
| 3452478 | <b>AMIGO2</b>    | adhesion molecule with Ig-like domain 2                                                                         | -1.39 | 1.5E-07 | 4.2E-06 |
| 3405587 | <b>GPRC5A</b>    | G protein-coupled receptor, family C, group 5, member A                                                         | -1.40 | 2.2E-09 | 2.6E-07 |
| 2946219 | <b>HIST1H2AB</b> | histone cluster 1, H2ab                                                                                         | -1.40 | 8.5E-06 | 8.1E-05 |
| 2899243 | <b>HIST1H4F</b>  | histone cluster 1, H4f                                                                                          | -1.40 | 4.7E-06 | 5.1E-05 |
| 2946364 | <b>HIST1H3F</b>  | histone cluster 1, H3f                                                                                          | -1.40 | 3.6E-06 | 4.2E-05 |
| 2900091 | <b>HIST1H2AL</b> | histone cluster 1, H2al                                                                                         | -1.41 | 7.7E-08 | 2.7E-06 |
| 2981912 | <b>EZR</b>       | ezrin                                                                                                           | -1.41 | 7.1E-08 | 2.5E-06 |
| 2858592 | <b>DEPDC1B</b>   | DEP domain containing 1B                                                                                        | -1.42 | 1.1E-07 | 3.2E-06 |
| 2946215 | <b>HIST1H3B</b>  | histone cluster 1, H3b                                                                                          | -1.42 | 1.1E-07 | 3.2E-06 |
| 2946194 | <b>HIST1H1A</b>  | histone cluster 1, H1a                                                                                          | -1.43 | 1.6E-05 | 1.4E-04 |
| 3063685 | <b>MCM7</b>      | minichromosome maintenance complex component 7                                                                  | -1.43 | 9.3E-07 | 1.6E-05 |
| 2388219 | <b>EXO1</b>      | exonuclease 1                                                                                                   | -1.44 | 2.5E-07 | 6.0E-06 |
| 3651509 | <b>ERI2</b>      | ERI1 exoribonuclease family member 2                                                                            | -1.44 | 9.3E-09 | 6.2E-07 |
| 2947040 | <b>HIST1H2AJ</b> | histone cluster 1, H2aj                                                                                         | -1.47 | 9.2E-04 | 3.1E-03 |
| 2577896 | <b>MCM6</b>      | minichromosome maintenance complex component 6                                                                  | -1.47 | 7.2E-08 | 2.5E-06 |
| 3445028 | <b>GPR19</b>     | G protein-coupled receptor 19                                                                                   | -1.47 | 2.3E-04 | 1.1E-03 |
| 2946268 | <b>HIST1H2BC</b> | histone cluster 1, H2bc                                                                                         | -1.47 | 2.5E-05 | 1.9E-04 |
| 3377423 | <b>CDCA5</b>     | cell division cycle associated 5                                                                                | -1.47 | 1.2E-06 | 1.9E-05 |
| 3874438 | <b>CDC25B</b>    | cell division cycle 25 homolog B (S. pombe)                                                                     | -1.47 | 7.6E-09 | 5.5E-07 |
| 2975655 | <b>FAM54A</b>    | family with sequence similarity 54, member A                                                                    | -1.48 | 6.6E-07 | 1.2E-05 |
| 2742985 | <b>PLK4</b>      | polo-like kinase 4                                                                                              | -1.48 | 2.1E-06 | 2.9E-05 |
| 3962165 | <b>CENPM</b>     | centromere protein M                                                                                            | -1.48 | 3.3E-06 | 4.0E-05 |
| 2899772 | <b>HIST1H2AH</b> | histone cluster 1, H2ah                                                                                         | -1.48 | 2.3E-05 | 1.7E-04 |
| 2473284 | <b>CENPO</b>     | centromere protein O                                                                                            | -1.48 | 1.2E-06 | 1.9E-05 |
| 2675936 | <b>POC1A</b>     | POC1 centriolar protein homolog A (Chlamydomonas)                                                               | -1.49 | 2.0E-06 | 2.8E-05 |
| 2900059 | <b>HIST1H2BM</b> | histone cluster 1, H2bm                                                                                         | -1.49 | 2.7E-07 | 6.3E-06 |
| 3726375 | <b>EME1</b>      | essential meiotic endonuclease 1 homolog 1 (S. pombe)                                                           | -1.49 | 2.5E-07 | 6.0E-06 |
| 3728964 | <b>PRR11</b>     | proline rich 11                                                                                                 | -1.49 | 1.2E-09 | 1.7E-07 |
| 2711034 | <b>C3ORF59</b>   | chromosome 3 open reading frame 59                                                                              | -1.50 | 3.8E-09 | 3.5E-07 |
| 2652027 | <b>CLDN11</b>    | claudin 11                                                                                                      | -1.50 | 7.7E-09 | 5.6E-07 |
| 2899206 | <b>HIST1H2BF</b> | histone cluster 1, H2bf                                                                                         | -1.51 | 9.2E-08 | 3.0E-06 |
| 3706753 | <b>GSG2</b>      | germ cell associated 2 (haspin)                                                                                 | -1.51 | 3.6E-07 | 7.9E-06 |
| 3540136 | <b>HSPA2</b>     | heat shock 70kDa protein 2                                                                                      | -1.51 | 3.1E-10 | 9.8E-08 |
| 3444043 | <b>OLR1</b>      | oxidized low density lipoprotein (lectin-like) receptor 1                                                       | -1.51 | 1.1E-06 | 1.8E-05 |
| 2411228 | <b>STIL</b>      | SCL/TAL1 interrupting locus                                                                                     | -1.52 | 2.0E-08 | 1.1E-06 |
| 3342426 | <b>C11ORF82</b>  | chromosome 11 open reading frame 82                                                                             | -1.52 | 2.0E-09 | 2.4E-07 |
| 3438061 | <b>GPR133</b>    | G protein-coupled receptor 133                                                                                  | -1.52 | 1.9E-09 | 2.4E-07 |
| 2900051 | <b>HIST1H3H</b>  | histone cluster 1, H3h                                                                                          | -1.53 | 4.0E-07 | 8.4E-06 |
| 3415857 | <b>ESPL1</b>     | extra spindle pole bodies homolog 1 (S. cerevisiae)                                                             | -1.53 | 7.1E-08 | 2.5E-06 |
| 3595979 | <b>CCNB2</b>     | cyclin B2                                                                                                       | -1.53 | 7.6E-09 | 5.5E-07 |
| 3186966 | <b>TLR4</b>      | toll-like receptor 4                                                                                            | -1.53 | 5.7E-07 | 1.1E-05 |
| 2474240 | <b>KHK</b>       | ketoheokinase (fructokinase)                                                                                    | -1.53 | 2.0E-06 | 2.8E-05 |
| 3151534 | <b>ATAD2</b>     | ATPase family, AAA domain containing 2                                                                          | -1.55 | 7.4E-07 | 1.4E-05 |
| 2600689 | <b>EPHA4</b>     | EPH receptor A4                                                                                                 | -1.55 | 5.0E-08 | 1.9E-06 |
| 2739160 | <b>CCDC109B</b>  | coiled-coil domain containing 109B                                                                              | -1.55 | 4.2E-07 | 8.7E-06 |
| 3286602 | <b>CXCL12</b>    | chemokine (C-X-C motif) ligand 12                                                                               | -1.57 | 2.0E-11 | 2.7E-08 |
| 3591704 | <b>WDR76</b>     | WD repeat domain 76                                                                                             | -1.57 | 5.0E-09 | 4.2E-07 |
| 4007689 | <b>KCND1</b>     | potassium voltage-gated channel, Shal-related subfamily, member 1                                               | -1.57 | 8.3E-09 | 5.8E-07 |
| 3044597 | <b>PDE1C</b>     | phosphodiesterase 1C, calmodulin-dependent 70kDa                                                                | -1.59 | 2.6E-08 | 1.2E-06 |
| 3703112 | <b>GINS2</b>     | GINS complex subunit 2 (Psf2 homolog)                                                                           | -1.59 | 2.0E-07 | 5.2E-06 |
| 3460467 | <b>RPSAP52</b>   | ribosomal protein SA pseudogene 52                                                                              | -1.59 | 3.7E-09 | 3.5E-07 |
| 3150289 | <b>SAMD12</b>    | sterile alpha motif domain containing 12                                                                        | -1.60 | 1.2E-06 | 1.9E-05 |
| 2946319 | <b>HIST1H4D</b>  | histone cluster 1, H4d                                                                                          | -1.61 | 3.0E-06 | 3.7E-05 |
| 3427767 | <b>TMPO</b>      | thymopoietin                                                                                                    | -1.63 | 2.1E-09 | 2.5E-07 |
| 2363852 | <b>FCRLA</b>     | Fc receptor-like A                                                                                              | -1.63 | 5.5E-07 | 1.1E-05 |
| 3401804 | <b>RAD51AP1</b>  | RAD51 associated protein 1                                                                                      | -1.63 | 2.6E-08 | 1.2E-06 |
| 2335922 | <b>CDKN2C</b>    | cyclin-dependent kinase inhibitor 2C (p18, inhibits CDK4)                                                       | -1.63 | 4.3E-07 | 8.9E-06 |
| 3078348 | <b>EZH2</b>      | enhancer of zeste homolog 2 (Drosophila)                                                                        | -1.64 | 9.7E-08 | 3.1E-06 |
| 2650199 | <b>SMC4</b>      | structural maintenance of chromosomes 4                                                                         | -1.64 | 5.7E-07 | 1.1E-05 |
| 2946369 | <b>HIST1H3G</b>  | histone cluster 1, H3g                                                                                          | -1.64 | 1.1E-07 | 3.3E-06 |
| 2899095 | <b>HIST1H4A</b>  | histone cluster 1, H4a                                                                                          | -1.65 | 8.3E-05 | 4.7E-04 |
| 3402571 | <b>NCAPD2</b>    | non-SMC condensin I complex, subunit D2                                                                         | -1.65 | 1.0E-09 | 1.6E-07 |
| 3791896 | <b>SERPINB7</b>  | serpin peptidase inhibitor, clade B (ovalbumin), member 7                                                       | -1.67 | 1.3E-08 | 7.9E-07 |

|         |                  |                                                                        |       |         |         |
|---------|------------------|------------------------------------------------------------------------|-------|---------|---------|
| 2859667 | <b>CENPK</b>     | centromere protein K                                                   | -1.67 | 1.2E-06 | 2.0E-05 |
| 3910785 | <b>AURKA</b>     | aurora kinase A                                                        | -1.67 | 2.0E-10 | 9.2E-08 |
| 2900116 | <b>HIST1H2BO</b> | histone cluster 1, H2bo                                                | -1.68 | 4.5E-08 | 1.8E-06 |
| 2522212 | <b>SGOL2</b>     | shugoshin-like 2 ( <i>S. pombe</i> )                                   | -1.68 | 1.2E-06 | 2.0E-05 |
| 3590086 | <b>RAD51</b>     | RAD51 homolog (RecA homolog, <i>E. coli</i> ) ( <i>S. cerevisiae</i> ) | -1.69 | 5.1E-08 | 1.9E-06 |
| 3454223 | <b>RACGAP1</b>   | Rac GTPase activating protein 1                                        | -1.69 | 1.5E-09 | 2.1E-07 |
| 3365776 | <b>E2F8</b>      | E2F transcription factor 8                                             | -1.69 | 2.3E-09 | 2.6E-07 |
| 4052881 | <b>FAM72D</b>    | family with sequence similarity 72, member D                           | -1.70 | 9.5E-08 | 3.0E-06 |
| 3619945 | <b>OIP5</b>      | Opa interacting protein 5                                              | -1.70 | 1.0E-09 | 1.6E-07 |
| 3710823 | <b>MYOCD</b>     | myocardin                                                              | -1.70 | 1.1E-06 | 1.8E-05 |
| 2877990 | <b>TMEM173</b>   | transmembrane protein 173                                              | -1.71 | 3.2E-10 | 9.8E-08 |
| 2720251 | <b>NCAPG</b>     | non-SMC condensin I complex, subunit G                                 | -1.71 | 3.1E-07 | 7.1E-06 |
| 2378937 | <b>DTL</b>       | denticleless homolog ( <i>Drosophila</i> )                             | -1.73 | 1.4E-07 | 4.0E-06 |
| 3936913 | <b>CDC45</b>     | cell division cycle 45 homolog ( <i>S. cerevisiae</i> )                | -1.73 | 1.1E-07 | 3.5E-06 |
| 2454444 | <b>NEK2</b>      | NIMA (never in mitosis gene a)-related kinase 2                        | -1.73 | 8.2E-09 | 5.8E-07 |
| 3984655 | <b>CENPI</b>     | centromere protein I                                                   | -1.73 | 1.5E-08 | 8.5E-07 |
| 2687979 | <b>KIAA1524</b>  | KIAA1524                                                               | -1.74 | 2.4E-07 | 5.9E-06 |
| 3934695 | <b>PTTG1</b>     | pituitary tumor-transforming 1 interacting protein                     | -1.74 | 1.6E-07 | 4.3E-06 |
| 2899146 | <b>HIST1H4C</b>  | histone cluster 1, H4c                                                 | -1.74 | 3.4E-08 | 1.5E-06 |
| 3707950 | <b>FAM64A</b>    | family with sequence similarity 64, member A                           | -1.74 | 8.3E-10 | 1.5E-07 |
| 3644764 | <b>CCNF</b>      | cyclin F                                                               | -1.74 | 1.4E-07 | 3.9E-06 |
| 3290210 | <b>ZWINT</b>     | ZW10 interactor                                                        | -1.75 | 4.2E-08 | 1.7E-06 |
| 3821263 | <b>CNN1</b>      | calponin 1, basic, smooth muscle                                       | -1.76 | 5.4E-10 | 1.3E-07 |
| 3720896 | <b>CDC6</b>      | cell division cycle 6 homolog ( <i>S. cerevisiae</i> )                 | -1.76 | 2.2E-08 | 1.1E-06 |
| 2840036 | <b>DOCK2</b>     | dedicator of cytokinesis 2                                             | -1.77 | 2.6E-09 | 2.7E-07 |
| 2571457 | <b>CKAP2L</b>    | cytoskeleton associated protein 2-like                                 | -1.78 | 1.6E-07 | 4.3E-06 |
| 2798915 | <b>TRIP13</b>    | thyroid hormone receptor interactor 13                                 | -1.78 | 8.5E-09 | 5.9E-07 |
| 3413875 | <b>TROAP</b>     | trophinin associated protein (tastin)                                  | -1.78 | 4.4E-08 | 1.8E-06 |
| 2350714 | <b>SYPL2</b>     | synaptophysin-like 2                                                   | -1.78 | 1.2E-06 | 1.9E-05 |
| 3442475 | <b>C1R</b>       | complement component 1, r subcomponent                                 | -1.79 | 7.4E-09 | 5.5E-07 |
| 3291435 | <b>RTKN2</b>     | rhotekin 2                                                             | -1.80 | 7.3E-07 | 1.3E-05 |
| 3604147 | <b>KIAA1199</b>  | KIAA1199                                                               | -1.80 | 1.0E-06 | 1.7E-05 |
| 3490655 | <b>CKAP2</b>     | cytoskeleton associated protein 2                                      | -1.80 | 1.1E-08 | 7.0E-07 |
| 2870889 | <b>C5ORF13</b>   | chromosome 5 open reading frame 13                                     | -1.81 | 3.5E-07 | 7.6E-06 |
| 2752725 | <b>NEIL3</b>     | nei endonuclease VIII-like 3 ( <i>E. coli</i> )                        | -1.82 | 6.4E-09 | 5.0E-07 |
| 2408189 | <b>PPT1</b>      | palmitoyl-protein thioesterase 1                                       | -1.82 | 1.4E-11 | 2.2E-08 |
| 3504617 | <b>SKA3</b>      | spindle and kinetochore associated complex subunit 3                   | -1.84 | 2.5E-08 | 1.2E-06 |
| 2450345 | <b>KIF14</b>     | kinesin family member 14                                               | -1.84 | 8.0E-07 | 1.4E-05 |
| 2874371 | <b>FBN2</b>      | fibrillin 2                                                            | -1.84 | 4.9E-08 | 1.9E-06 |
| 3788049 | <b>SKA1</b>      | spindle and kinetochore associated complex subunit 1                   | -1.84 | 1.1E-08 | 7.0E-07 |
| 3881443 | <b>TPX2</b>      | TPX2, microtubule-associated, homolog ( <i>Xenopus laevis</i> )        | -1.85 | 1.5E-10 | 7.6E-08 |
| 3136888 | <b>TOX</b>       | thymocyte selection-associated high mobility group box                 | -1.86 | 1.7E-08 | 9.4E-07 |
| 3607510 | <b>FANCI</b>     | Fanconi anemia, complementation group I                                | -1.86 | 2.8E-08 | 1.3E-06 |
| 3949055 | <b>GTSE1</b>     | G-2 and S-phase expressed 1                                            | -1.87 | 1.1E-08 | 7.1E-07 |
| 3886223 | <b>MYBL2</b>     | v-myb myeloblastosis viral oncogene homolog (avian)-like 2             | -1.87 | 3.5E-09 | 3.4E-07 |
| 3168508 | <b>MELK</b>      | maternal embryonic leucine zipper kinase                               | -1.87 | 5.7E-09 | 4.5E-07 |
| 3223687 | <b>PHF19</b>     | PHD finger protein 19                                                  | -1.88 | 1.8E-09 | 2.3E-07 |
| 3744263 | <b>AURKB</b>     | aurora kinase B                                                        | -1.89 | 5.3E-09 | 4.3E-07 |
| 2610241 | <b>FANCD2</b>    | Fanconi anemia, complementation group D2                               | -1.90 | 1.1E-08 | 6.9E-07 |
| 2416218 | <b>ITGB3BP</b>   | integrin beta 3 binding protein (beta3-endonexin)                      | -1.90 | 6.9E-07 | 1.3E-05 |
| 2806517 | <b>SKP2</b>      | S-phase kinase-associated protein 2 (p45)                              | -1.92 | 3.1E-10 | 9.8E-08 |
| 2914777 | <b>TTK</b>       | TTK protein kinase                                                     | -1.92 | 2.0E-07 | 5.2E-06 |
| 2877378 | <b>CDC25C</b>    | cell division cycle 25 homolog C ( <i>S. pombe</i> )                   | -1.93 | 2.5E-06 | 3.2E-05 |
| 3474104 | <b>CIT</b>       | citron (rho-interacting, serine/threonine kinase 21)                   | -1.94 | 1.1E-09 | 1.6E-07 |
| 3689880 | <b>SHCBP1</b>    | SHC SH2-domain binding protein 1                                       | -1.97 | 1.0E-09 | 1.6E-07 |
| 2947063 | <b>HIST1H2AK</b> | histone cluster 1, H2ak                                                | -1.98 | 6.4E-08 | 2.3E-06 |
| 3599811 | <b>KIF23</b>     | kinesin family member 23                                               | -1.99 | 2.5E-09 | 2.7E-07 |
| 3082181 | <b>NCAPG2</b>    | non-SMC condensin II complex, subunit G2                               | -2.00 | 3.9E-09 | 3.6E-07 |
| 3590014 | <b>CASC5</b>     | cancer susceptibility candidate 5                                      | -2.00 | 4.2E-08 | 1.7E-06 |
| 2796510 | <b>MLF1IP</b>    | MLF1 interacting protein                                               | -2.01 | 2.2E-08 | 1.1E-06 |
| 3635903 | <b>DNM1P41</b>   | DNM1 pseudogene 41                                                     | -2.01 | 1.1E-02 | 2.3E-02 |
| 3752258 | <b>EVI2B</b>     | ecotropic viral integration site 2B                                    | -2.02 | 3.4E-08 | 1.5E-06 |
| 2899090 | <b>HIST1H3A</b>  | histone cluster 1, H3a                                                 | -2.02 | 1.8E-08 | 9.8E-07 |
| 3250146 | <b>SRGN</b>      | serglycin                                                              | -2.03 | 1.5E-10 | 7.6E-08 |
| 2604254 | <b>HJURP</b>     | Holliday junction recognition protein                                  | -2.04 | 5.4E-10 | 1.3E-07 |
| 2747190 | <b>DCLK2</b>     | doublecortin-like kinase 2                                             | -2.05 | 1.1E-09 | 1.7E-07 |
| 2714955 | <b>TACC3</b>     | transforming, acidic coiled-coil containing protein 3                  | -2.05 | 6.7E-09 | 5.2E-07 |
| 2620256 | <b>KIF15</b>     | kinesin family member 15                                               | -2.07 | 1.5E-08 | 8.8E-07 |
| 3008019 | <b>ELN</b>       | elastin                                                                | -2.09 | 1.9E-09 | 2.4E-07 |
| 3593575 | <b>SLC27A2</b>   | solute carrier family 27 (fatty acid transporter), member 2            | -2.09 | 7.3E-10 | 1.5E-07 |
| 3515965 | <b>DIAPH3</b>    | diaphanous homolog 3 ( <i>Drosophila</i> )                             | -2.09 | 3.1E-08 | 1.4E-06 |
| 2947095 | <b>HIST1H3J</b>  | histone cluster 1, H3j                                                 | -2.09 | 9.3E-07 | 1.6E-05 |
| 3736290 | <b>BIRC5</b>     | baculoviral IAP repeat-containing 5                                    | -2.09 | 7.0E-09 | 5.3E-07 |

|         |                  |                                                                               |       |         |         |
|---------|------------------|-------------------------------------------------------------------------------|-------|---------|---------|
| 3772158 | <b>TK1</b>       | thymidine kinase 1, soluble                                                   | -2.10 | 5.2E-10 | 1.3E-07 |
| 2378325 | <b>SERTAD4</b>   | SERTA domain containing 4                                                     | -2.10 | 7.0E-10 | 1.4E-07 |
| 3776139 | <b>NDC80</b>     | NDC80 homolog, kinetochore complex component ( <i>S. cerevisiae</i> )         | -2.11 | 2.0E-08 | 1.1E-06 |
| 2838656 | <b>HMMR</b>      | hyaluronan-mediated motility receptor (RHAMM)                                 | -2.11 | 4.8E-08 | 1.9E-06 |
| 3248289 | <b>CDK1</b>      | cyclin-dependent kinase 1                                                     | -2.12 | 9.4E-08 | 3.0E-06 |
| 3775842 | <b>TYMS</b>      | thymidylate synthetase                                                        | -2.13 | 3.7E-09 | 3.5E-07 |
| 2665572 | <b>SGOL1</b>     | shugoshin-like 1 ( <i>S. pombe</i> )                                          | -2.13 | 4.5E-08 | 1.8E-06 |
| 3587457 | <b>ARHGAP11A</b> | Rho GTPase activating protein 11A                                             | -2.13 | 9.9E-08 | 3.1E-06 |
| 3589697 | <b>BUB1B</b>     | budding uninhibited by benzimidazoles 1 homolog beta (yeast)                  | -2.16 | 2.8E-10 | 9.8E-08 |
| 2451693 | <b>FMOD</b>      | fibromodulin                                                                  | -2.17 | 9.4E-10 | 1.6E-07 |
| 2784113 | <b>CCNA2</b>     | cyclin A2                                                                     | -2.17 | 2.2E-10 | 9.7E-08 |
| 3091475 | <b>SCARA3</b>    | scavenger receptor class A, member 3                                          | -2.17 | 4.6E-12 | 1.4E-08 |
| 3463727 | <b>LIN7A</b>     | lin-7 homolog A ( <i>C. elegans</i> )                                         | -2.18 | 5.5E-10 | 1.3E-07 |
| 3590388 | <b>NUSAP1</b>    | nucleolar and spindle associated protein 1                                    | -2.18 | 2.3E-09 | 2.6E-07 |
| 3428268 | <b>GAS2L3</b>    | growth arrest-specific 2 like 3                                               | -2.18 | 8.7E-11 | 7.6E-08 |
| 3653072 | <b>PLK1</b>      | polo-like kinase 1                                                            | -2.19 | 4.5E-10 | 1.2E-07 |
| 3756193 | <b>TOP2A</b>     | topoisomerase (DNA) II alpha 170kDa                                           | -2.19 | 1.8E-08 | 9.7E-07 |
| 2494484 | <b>NCAPH</b>     | non-SMC condensin I complex, subunit H                                        | -2.23 | 1.7E-09 | 2.2E-07 |
| 3980560 | <b>KIF4A</b>     | kinesin family member 4A                                                      | -2.23 | 7.7E-10 | 1.5E-07 |
| 3852565 | <b>ASF1B</b>     | ASF1 anti-silencing function 1 homolog B ( <i>S. cerevisiae</i> )             | -2.24 | 9.0E-09 | 6.1E-07 |
| 3023883 | <b>CPA4</b>      | carboxypeptidase A4                                                           | -2.24 | 2.7E-08 | 1.3E-06 |
| 2449559 | <b>ASPM</b>      | asp (abnormal spindle) homolog, microcephaly associated ( <i>Drosophila</i> ) | -2.25 | 7.3E-07 | 1.3E-05 |
| 3884892 | <b>FAM83D</b>    | family with sequence similarity 83, member D                                  | -2.25 | 3.8E-11 | 4.4E-08 |
| 3090697 | <b>CDCA2</b>     | cell division cycle associated 2                                              | -2.26 | 2.8E-09 | 2.8E-07 |
| 2379863 | <b>CENPF</b>     | centromere protein F, 350/400kDa (mitosin)                                    | -2.26 | 1.7E-07 | 4.5E-06 |
| 2813414 | <b>CCNB1</b>     | cyclin B1                                                                     | -2.27 | 9.0E-10 | 1.6E-07 |
| 3639031 | <b>PRC1</b>      | protein regulator of cytokinesis 1                                            | -2.28 | 6.1E-11 | 6.2E-08 |
| 3440598 | <b>FOXM1</b>     | forkhead box M1                                                               | -2.30 | 1.9E-09 | 2.4E-07 |
| 2334098 | <b>KIF2C</b>     | kinesin family member 2C                                                      | -2.31 | 1.4E-08 | 7.9E-07 |
| 2364438 | <b>NUF2</b>      | NUF2, NDC80 kinetochore complex component, homolog ( <i>S. cerevisiae</i> )   | -2.31 | 2.4E-09 | 2.6E-07 |
| 2827185 | <b>LMNB1</b>     | lamin B1                                                                      | -2.31 | 2.2E-09 | 2.6E-07 |
| 3258168 | <b>KIF11</b>     | kinesin family member 11                                                      | -2.32 | 3.5E-08 | 1.5E-06 |
| 2333136 | <b>CDC20</b>     | cell division cycle 20 homolog ( <i>S. cerevisiae</i> )                       | -2.34 | 2.5E-10 | 9.8E-08 |
| 2324084 | <b>CDA</b>       | cytidine deaminase                                                            | -2.36 | 9.5E-10 | 1.6E-07 |
| 2473991 | <b>CENPA</b>     | centromere protein A                                                          | -2.37 | 2.7E-10 | 9.8E-08 |
| 3129149 | <b>PBK</b>       | PDZ binding kinase                                                            | -2.40 | 4.4E-09 | 3.8E-07 |
| 3756911 | <b>KRT34</b>     | keratin 34                                                                    | -2.41 | 3.0E-10 | 9.8E-08 |
| 3565663 | <b>DLGAP5</b>    | discs, large ( <i>Drosophila</i> ) homolog-associated protein 5               | -2.42 | 1.4E-10 | 7.6E-08 |
| 3629103 | <b>KIAA0101</b>  | KIAA0101                                                                      | -2.42 | 1.1E-09 | 1.6E-07 |
| 2997376 | <b>ANLN</b>      | anillin, actin binding protein                                                | -2.44 | 1.5E-09 | 2.1E-07 |
| 2438282 | <b>IQGAP3</b>    | IQ motif containing GTPase activating protein 3                               | -2.45 | 5.4E-10 | 1.3E-07 |
| 3442322 | <b>CDCA3</b>     | cell division cycle associated 3                                              | -2.45 | 7.3E-09 | 5.5E-07 |
| 2947073 | <b>HIST1H1B</b>  | histone cluster 1, H1b                                                        | -2.45 | 1.9E-08 | 1.0E-06 |
| 3750785 | <b>SPAG5</b>     | sperm associated antigen 5                                                    | -2.45 | 1.6E-10 | 8.0E-08 |
| 3312490 | <b>MKI67</b>     | antigen identified by monoclonal antibody Ki-67                               | -2.50 | 6.3E-10 | 1.3E-07 |
| 2469252 | <b>RRM2</b>      | ribonucleotide reductase M2                                                   | -2.52 | 4.2E-09 | 3.7E-07 |
| 2585933 | <b>SPC25</b>     | SPC25, NDC80 kinetochore complex component, homolog ( <i>S. cerevisiae</i> )  | -2.54 | 6.4E-10 | 1.3E-07 |
| 3945545 | <b>APOBEC3B</b>  | apolipoprotein B mRNA editing enzyme, catalytic polypeptide-like 3B           | -2.56 | 2.9E-10 | 9.8E-08 |
| 2570616 | <b>BUB1</b>      | budding uninhibited by benzimidazoles 1 homolog (yeast)                       | -2.57 | 5.5E-10 | 1.3E-07 |
| 3258444 | <b>CEP55</b>     | centrosomal protein 55kDa                                                     | -2.59 | 4.3E-10 | 1.2E-07 |
| 3536336 | <b>CDKN3</b>     | cyclin-dependent kinase inhibitor 3                                           | -2.63 | 9.0E-12 | 2.1E-08 |
| 2793951 | <b>HMGB2</b>     | high-mobility group box 2                                                     | -2.63 | 5.7E-09 | 4.5E-07 |
| 2330773 | <b>CDCA8</b>     | cell division cycle associated 8                                              | -2.65 | 1.6E-09 | 2.1E-07 |
| 4041113 | <b>KPNA2</b>     | karyopherin alpha 2 (RAG cohort 1, importin alpha 1)                          | -2.72 | 4.6E-09 | 4.0E-07 |
| 2417528 | <b>DEPDC1</b>    | DEP domain containing 1                                                       | -2.72 | 5.1E-08 | 1.9E-06 |
| 2946225 | <b>HIST1H2BB</b> | histone cluster 1, H2bb                                                       | -2.81 | 2.2E-06 | 2.9E-05 |
| 3209726 | <b>ALDH1A1</b>   | aldehyde dehydrogenase 1 family, member A1                                    | -2.95 | 7.3E-09 | 5.5E-07 |
| 2830638 | <b>KIF20A</b>    | kinesin family member 20A                                                     | -2.96 | 2.8E-12 | 1.4E-08 |
| 3381817 | <b>UCP2</b>      | uncoupling protein 2 (mitochondrial, proton carrier)                          | -2.98 | 4.5E-12 | 1.4E-08 |

1153 protein coding genes (1012 up and 141 down) were identified as significantly differentially expressed in BS cells using the following cutoff: absolute expression ratio (ER)  $\geq 1.5$  and false discovery rate (FDR)  $< 0.05$ . Thus significantly differentially expressed genes have  $\log_2$  expression values of  $\geq |0.59|$ .

**Table S2C. Common significantly differentially expressed mRNAs in BS and BLM-depleted cells**

| Probe Set ID | Gene Symbol     | Gene Description                                                                        | Log <sub>2</sub> (ER) |           |
|--------------|-----------------|-----------------------------------------------------------------------------------------|-----------------------|-----------|
|              |                 |                                                                                         | BS vs NM              | BLM vs NS |
| 3299504      | <b>ACTA2</b>    | actin, alpha 2, smooth muscle, aorta                                                    | -1.46                 | -1.05     |
| 3311832      | <b>ADAM12</b>   | ADAM metallopeptidase domain 12                                                         | 0.90                  | -1.18     |
| 3927480      | <b>ADAMTS5</b>  | ADAM metallopeptidase with thrombospondin type 1 motif, 5                               | 0.93                  | 2.31      |
| 2921296      | <b>AMD1</b>     | adenosylmethionine decarboxylase 1                                                      | 0.65                  | 0.78      |
| 2664452      | <b>ANKRD28</b>  | ankyrin repeat domain 28                                                                | 0.88                  | -0.63     |
| 2997376      | <b>ANLN</b>     | anillin, actin binding protein                                                          | 1.17                  | -2.44     |
| 3638607      | <b>ANPEP</b>    | alanyl (membrane) aminopeptidase                                                        | 0.91                  | 1.18      |
| 3327906      | <b>API5</b>     | apoptosis inhibitor 5                                                                   | 0.87                  | -0.82     |
| 3469319      | <b>APPL2</b>    | adaptor protein, phosphotyrosine interaction, PH domain and leucine zipper containing 2 | 0.67                  | -0.72     |
| 3237548      | <b>ARL5B</b>    | ADP-ribosylation factor-like 5B                                                         | 0.59                  | 0.61      |
| 3683037      | <b>ARL6IP1</b>  | ADP-ribosylation factor-like 6 interacting protein 1                                    | 0.70                  | -0.72     |
| 2510884      | <b>ARL6IP6</b>  | ADP-ribosylation-like factor 6 interacting protein 6                                    | 0.74                  | -0.60     |
| 2531779      | <b>ARMC9</b>    | armadillo repeat containing 9                                                           | 0.69                  | -0.68     |
| 3395464      | <b>ASAM</b>     | adipocyte-specific adhesion molecule                                                    | 0.72                  | 0.71      |
| 3809826      | <b>ATP8B1</b>   | ATPase, aminophospholipid transporter, class I, type 8B, member 1                       | 0.89                  | -1.28     |
| 3592023      | <b>B2M</b>      | beta-2-microglobulin                                                                    | 0.64                  | 0.59      |
| 3921933      | <b>BACE2</b>    | beta-site APP-cleaving enzyme 2                                                         | -0.65                 | 1.06      |
| 3061651      | <b>BET1</b>     | blocked early in transport 1 homolog (S. cerevisiae)                                    | 1.10                  | 0.66      |
| 3807474      | <b>C18ORF32</b> | chromosome 18 open reading frame 32                                                     | 1.17                  | 0.77      |
| 2711034      | <b>C3ORF59</b>  | chromosome 3 open reading frame 59                                                      | 0.77                  | -1.50     |
| 2766492      | <b>C4ORF34</b>  | chromosome 4 open reading frame 34                                                      | 0.83                  | -0.70     |
| 2714644      | <b>C4ORF42</b>  | chromosome 4 open reading frame 42                                                      | 0.69                  | 0.73      |
| 2870889      | <b>C5ORF13</b>  | chromosome 5 open reading frame 13                                                      | 0.92                  | -1.81     |
| 3021158      | <b>C7ORF58</b>  | chromosome 7 open reading frame 58                                                      | 1.22                  | 0.61      |
| 3162529      | <b>C9ORF150</b> | chromosome 9 open reading frame 150                                                     | 0.63                  | 1.49      |
| 3781531      | <b>CABLES1</b>  | Cdk5 and Abl enzyme substrate 1                                                         | -0.59                 | 1.67      |
| 2840002      | <b>CCDC99</b>   | coiled-coil domain containing 99                                                        | 0.72                  | -0.92     |
| 7385547      | <b>CCL2</b>     | chemokine (C-C motif) ligand 2                                                          | 0.82                  | -0.93     |
| 2642887      | <b>CCRL1</b>    | chemokine (C-C motif) receptor-like 1                                                   | 0.96                  | -0.67     |
| 2913694      | <b>CD109</b>    | CD109 molecule                                                                          | 0.85                  | 1.61      |
| 2548617      | <b>CDC42EP3</b> | CDC42 effector protein (Rho GTPase binding) 3                                           | 0.95                  | -1.03     |
| 3466826      | <b>CDK17</b>    | cyclin-dependent kinase 17                                                              | 0.72                  | 0.78      |
| 3984655      | <b>CENPI</b>    | centromere protein I                                                                    | 0.59                  | -1.73     |
| 3490655      | <b>CKAP2</b>    | cytoskeleton associated protein 2                                                       | 0.73                  | -1.80     |
| 2652027      | <b>CLDN11</b>   | claudin 11                                                                              | 1.63                  | -1.50     |
| 3012019      | <b>CLDN12</b>   | claudin 12                                                                              | 1.04                  | -0.84     |
| 2769947      | <b>CLOCK</b>    | clock homolog (mouse)                                                                   | 0.68                  | -0.66     |
| 3821263      | <b>CNN1</b>     | calponin 1, basic, smooth muscle                                                        | -1.33                 | -1.76     |
| 3599495      | <b>CORO2B</b>   | coronin, actin binding protein, 2B                                                      | 0.60                  | 0.97      |
| 4019900      | <b>CUL4B</b>    | cullin 4B                                                                               | 0.62                  | -0.96     |
| 3771642      | <b>CYGB</b>     | cytoglobin                                                                              | -0.69                 | 1.47      |
| 2686023      | <b>DCBLD2</b>   | discoidin, CUB and LCCL domain containing 2                                             | 1.64                  | 0.95      |
| 2397025      | <b>DHRS3</b>    | dehydrogenase/reductase (SDR family) member 3                                           | -0.66                 | -1.38     |
| 3865635      | <b>DMPK</b>     | dystrophia myotonica-protein kinase                                                     | -0.83                 | -0.62     |
| 2601648      | <b>DOCK10</b>   | dedicator of cytokinesis 10                                                             | 0.93                  | -0.59     |
| 3812074      | <b>DSEL</b>     | dermatan sulfate epimerase-like                                                         | 1.64                  | 1.25      |
| 2515276      | <b>DYNC1I2</b>  | dynein, cytoplasmic 1, intermediate chain 2                                             | 0.64                  | 0.70      |
| 4004819      | <b>DYNLT3</b>   | dynein, light chain, Tctex-type 3                                                       | 0.84                  | 1.40      |
| 3148582      | <b>EIF3E</b>    | eukaryotic translation initiation factor 3, subunit E                                   | 0.69                  | 0.72      |
| 3591963      | <b>EIF3J</b>    | eukaryotic translation initiation factor 3, subunit J                                   | 0.65                  | 0.68      |
| 3403015      | <b>ENO2</b>     | enolase 2 (gamma, neuronal)                                                             | -0.71                 | -1.12     |
| 3445908      | <b>EPS8</b>     | epidermal growth factor receptor pathway substrate 8                                    | 1.00                  | -0.59     |
| 2812435      | <b>ERBB2IP</b>  | erb2 interacting protein                                                                | 1.00                  | -0.60     |
| 3448975      | <b>ERGIC2</b>   | ERGIC and golgi 2                                                                       | 0.82                  | 0.64      |
| 3039177      | <b>ETV1</b>     | ets variant 1                                                                           | 0.82                  | 1.41      |
| 2816459      | <b>F2R</b>      | coagulation factor II (thrombin) receptor                                               | 1.59                  | 1.04      |
| 4022781      | <b>FAM122B</b>  | family with sequence similarity 122B                                                    | 0.60                  | -1.20     |
| 2584134      | <b>FAP</b>      | fibroblast activation protein, alpha                                                    | 0.72                  | -1.03     |
| 3043936      | <b>FKBP14</b>   | FK506 binding protein 14, 22 kDa                                                        | 0.81                  | 1.27      |
| 2451693      | <b>FMOD</b>     | fibromodulin                                                                            | -1.10                 | -2.17     |
| 2545953      | <b>FNDC4</b>    | fibronectin type III domain containing 4                                                | -0.64                 | 0.76      |
| 2523045      | <b>FZD7</b>     | frizzled homolog 7 (Drosophila)                                                         | 0.75                  | -0.66     |
| 3047660      | <b>GLI3</b>     | GLI family zinc finger 3                                                                | 0.65                  | 0.60      |
| 2992814      | <b>GNMB</b>     | glycoprotein (transmembrane) nmb                                                        | 1.33                  | 0.66      |
| 3405587      | <b>GPRC5A</b>   | G protein-coupled receptor, family C, group 5, member A                                 | 0.79                  | -1.40     |
| 2351004      | <b>GSTM5</b>    | glutathione S-transferase mu 5                                                          | -1.00                 | -0.88     |
| 3151086      | <b>HAS2</b>     | hyaluronan synthase 2                                                                   | 1.86                  | 1.27      |
| 3058944      | <b>HGF</b>      | hepatocyte growth factor (hepapoietin A; scatter factor)                                | 1.18                  | 1.99      |
| 2946232      | <b>HIST1H1C</b> | histone cluster 1, H1c                                                                  | -0.96                 | -1.34     |
| 2899171      | <b>HIST1H1E</b> | histone cluster 1, H1e                                                                  | -0.67                 | -1.16     |
| 2977265      | <b>HIVEP2</b>   | human immunodeficiency virus type I enhancer binding protein 2                          | 0.60                  | 0.65      |
| 2890148      | <b>HNRNPH1</b>  | heterogeneous nuclear ribonucleoprotein H1 (H)                                          | -0.72                 | -0.65     |
| 3984779      | <b>HNRNPH2</b>  | heterogeneous nuclear ribonucleoprotein H2 (H)                                          | 0.86                  | 0.65      |

|         |                  |                                                                                                                                             |       |       |
|---------|------------------|---------------------------------------------------------------------------------------------------------------------------------------------|-------|-------|
| 3991698 | <b>HPRT1</b>     | hypoxanthine phosphoribosyltransferase 1                                                                                                    | 0.71  | -0.67 |
| 3168255 | <b>HRCT1</b>     | histidine rich carboxyl terminus 1                                                                                                          | -0.69 | -0.76 |
| 3214668 | <b>IARS</b>      | isoleucyl-tRNA synthetase                                                                                                                   | 0.89  | 0.61  |
| 2362394 | <b>IFI16</b>     | interferon, gamma-inducible protein 16                                                                                                      | 1.23  | 0.74  |
| 4018729 | <b>IL13RA2</b>   | interleukin 13 receptor, alpha 2                                                                                                            | 0.81  | 1.20  |
| 2857416 | <b>IL6ST</b>     | interleukin 6 signal transducer (gp130, oncostatin M receptor)                                                                              | 1.70  | -0.78 |
| 2806468 | <b>IL7R</b>      | interleukin 7 receptor                                                                                                                      | 1.02  | 0.63  |
| 3601511 | <b>ISLR</b>      | immunoglobulin superfamily containing leucine-rich repeat                                                                                   | -0.61 | -0.62 |
| 3690193 | <b>ITFG1</b>     | integrin alpha FG-GAP repeat containing 1                                                                                                   | 0.70  | 0.59  |
| 3630736 | <b>ITGA11</b>    | integrin, alpha 11                                                                                                                          | -1.21 | 1.04  |
| 2809245 | <b>ITGA2</b>     | integrin, alpha 2 (CD49B, alpha 2 subunit of VLA-2 receptor)                                                                                | 1.23  | 1.76  |
| 3296046 | <b>KCNMA1</b>    | potassium large conductance calcium-activated channel, subfamily M, alpha member 1                                                          | 1.62  | 0.88  |
| 3390180 | <b>KDEL2</b>     | KDEL (Lys-Asp-Glu-Leu) containing 2                                                                                                         | 0.73  | -0.62 |
| 3629103 | <b>KIAA0101</b>  | KIAA0101                                                                                                                                    | 0.66  | -2.42 |
| 2830638 | <b>KIF20A</b>    | kinesin family member 20A                                                                                                                   | 0.74  | -2.96 |
| 3464747 | <b>KITLG</b>     | KIT ligand                                                                                                                                  | 1.10  | -0.72 |
| 3756911 | <b>KRT34</b>     | keratin 34                                                                                                                                  | -1.14 | -2.41 |
| 2458289 | <b>LBR</b>       | lamin B receptor                                                                                                                            | 0.77  | -0.72 |
| 2960010 | <b>LMBRD1</b>    | LMBR1 domain containing 1                                                                                                                   | 0.66  | 0.69  |
| 2451043 | <b>LMOD1</b>     | leiomodrin 1 (smooth muscle)                                                                                                                | -0.61 | -1.21 |
| 3850501 | <b>LOC147727</b> | hypothetical LOC147727                                                                                                                      | 0.67  | 0.92  |
| 2902574 | <b>LY6G5B</b>    | lymphocyte antigen 6 complex, locus G5B                                                                                                     | 0.75  | -0.72 |
| 2823551 | <b>MAN2A1</b>    | mannosidase, alpha, class 2A, member 1                                                                                                      | 0.88  | 0.77  |
| 3097152 | <b>MCM4</b>      | minichromosome maintenance complex component 4                                                                                              | 0.76  | -1.02 |
| 3421300 | <b>MDM2</b>      | Mdm2 p53 binding protein homolog (mouse)                                                                                                    | 0.80  | 0.73  |
| 3414739 | <b>METTL7A</b>   | methyltransferase like 7A                                                                                                                   | 0.61  | -1.23 |
| 3651955 | <b>METTL9</b>    | methyltransferase like 9                                                                                                                    | 0.63  | 0.76  |
| 3443226 | <b>MFAP5</b>     | microfibrillar associated protein 5                                                                                                         | -2.09 | -0.97 |
| 2649723 | <b>MFSD1</b>     | major facilitator superfamily domain containing 1                                                                                           | 1.02  | 1.00  |
| 3143660 | <b>MMP16</b>     | matrix metalloproteinase 16 (membrane-inserted)                                                                                             | 0.97  | 1.65  |
| 3218067 | <b>MRPL50</b>    | mitochondrial ribosomal protein L50                                                                                                         | 0.96  | 0.74  |
| 2705748 | <b>NCEH1</b>     | neutral cholesterol ester hydrolase 1                                                                                                       | 0.80  | -0.60 |
| 3887635 | <b>NCOA3</b>     | nuclear receptor coactivator 3                                                                                                              | 0.74  | 0.66  |
| 2394784 | <b>NOL9</b>      | nucleolar protein 9                                                                                                                         | 0.71  | -0.72 |
| 3724197 | <b>NSF</b>       | N-ethylmaleimide-sensitive factor                                                                                                           | 0.70  | -0.85 |
| 2915828 | <b>NT5E</b>      | 5'-nucleotidase, ecto (CD73)                                                                                                                | 0.98  | 0.65  |
| 3590388 | <b>NUSAP1</b>    | nucleolar and spindle associated protein 1                                                                                                  | 0.79  | -2.18 |
| 3134922 | <b>PCMTD1</b>    | protein-L-isoaspartate (D-aspartate) O-methyltransferase domain containing 1                                                                | 0.60  | 0.99  |
| 3013255 | <b>PEG10</b>     | paternally expressed 10                                                                                                                     | 0.80  | -0.98 |
| 3462816 | <b>PHLDA1</b>    | pleckstrin homology-like domain, family A, member 1                                                                                         | 1.12  | 0.66  |
| 3010082 | <b>PHTF2</b>     | putative homeodomain transcription factor 2                                                                                                 | 0.66  | -0.73 |
| 3732230 | <b>PITPNC1</b>   | phosphatidylinositol transfer protein, cytoplasmic 1                                                                                        | 0.60  | 0.64  |
| 3252036 | <b>PLAU</b>      | plasminogen activator, urokinase                                                                                                            | 0.94  | 0.98  |
| 3728964 | <b>PRR11</b>     | proline rich 11                                                                                                                             | 0.80  | -1.49 |
| 3126191 | <b>PSD3</b>      | pleckstrin and Sec7 domain containing 3                                                                                                     | 0.90  | 0.95  |
| 2649367 | <b>PTX3</b>      | pentraxin 3, long                                                                                                                           | 1.48  | -1.08 |
| 2626167 | <b>PXK</b>       | PX domain containing serine/threonine kinase                                                                                                | 1.20  | 1.32  |
| 2935475 | <b>QKI</b>       | quaking homolog, KH domain RNA binding (mouse)                                                                                              | 0.71  | 0.60  |
| 2369339 | <b>RALGPS2</b>   | Ral GEF with PH domain and SH3 binding motif 2                                                                                              | 0.60  | -0.98 |
| 2583602 | <b>RBMS1</b>     | RNA binding motif, single stranded interacting protein 1                                                                                    | 1.13  | 0.63  |
| 2371346 | <b>RGL1</b>      | ral guanine nucleotide dissociation stimulator-like 1                                                                                       | 0.65  | 0.71  |
| 2614120 | <b>RPL15</b>     | ribosomal protein L15                                                                                                                       | 0.77  | 1.06  |
| 3318009 | <b>RRM1</b>      | ribonucleotide reductase M1                                                                                                                 | 0.60  | -0.83 |
| 2752006 | <b>SAP30</b>     | Sin3A-associated protein, 30kDa                                                                                                             | 0.64  | -0.61 |
| 2750594 | <b>SC4MOL</b>    | sterol-C4-methyl oxidase-like                                                                                                               | 1.26  | -0.88 |
| 3352904 | <b>SC5DL</b>     | sterol-C5-desaturase (ERG3 delta-5-desaturase homolog, S. cerevisiae)-like                                                                  | 0.70  | 0.60  |
| 2389789 | <b>SCCPDH</b>    | saccharopine dehydrogenase (putative)                                                                                                       | 0.64  | -0.71 |
| 3907234 | <b>SDC4</b>      | syndecan 4                                                                                                                                  | 0.59  | -0.84 |
| 3774906 | <b>SECTM1</b>    | secreted and transmembrane 1                                                                                                                | 1.26  | 0.59  |
| 3059464 | <b>SEMA3A</b>    | sema domain, immunoglobulin domain (Ig), short basic domain, secreted, (semaphorin) 3A                                                      | 1.28  | 0.91  |
| 2847967 | <b>SEMA5A</b>    | sema domain, seven thrombospondin repeats (type 1 and type 1-like), transmembrane domain (TM) and short cytoplasmic domain, (semaphorin) 5A | 1.08  | 0.74  |
| 3592755 | <b>SEMA6D</b>    | sema domain, transmembrane domain (TM), and cytoplasmic domain, (semaphorin) 6D                                                             | 0.62  | 1.10  |
| 3936951 | <b>SEPT5</b>     | septin 5                                                                                                                                    | -0.62 | 1.19  |
| 2972310 | <b>SERINC1</b>   | serine incorporator 1                                                                                                                       | 0.84  | 0.65  |
| 3190659 | <b>SET</b>       | SET nuclear oncogene                                                                                                                        | 1.18  | 0.61  |
| 2406064 | <b>SFPQ</b>      | splicing factor proline/glutamine-rich                                                                                                      | 1.19  | -0.67 |
| 3764738 | <b>SKA2</b>      | spindle and kinetochore associated complex subunit 2                                                                                        | 1.09  | -0.77 |
| 3768412 | <b>SLC16A6</b>   | solute carrier family 16, member 6 (monocarboxylic acid transporter 7)                                                                      | 0.85  | 3.66  |
| 2960955 | <b>SLC17A5</b>   | solute carrier family 17 (anion/sugar transporter), member 5                                                                                | 0.84  | 0.85  |
| 3147726 | <b>SLC25A32</b>  | solute carrier family 25, member 32                                                                                                         | 0.67  | 0.69  |
| 2319340 | <b>SLC25A33</b>  | solute carrier family 25, member 33                                                                                                         | 0.86  | 0.77  |
| 3060245 | <b>SLC25A40</b>  | solute carrier family 25, member 40                                                                                                         | 0.73  | -0.84 |
| 2476116 | <b>SLC30A6</b>   | solute carrier family 30 (zinc transporter), member 6                                                                                       | 0.65  | 0.81  |
| 2349043 | <b>SLC30A7</b>   | solute carrier family 30 (zinc transporter), member 7                                                                                       | 0.92  | 0.90  |
| 2701927 | <b>SLC33A1</b>   | solute carrier family 33 (acetyl-CoA transporter), member 1                                                                                 | 0.80  | 0.60  |

|         |                 |                                                                                 |       |       |
|---------|-----------------|---------------------------------------------------------------------------------|-------|-------|
| 3919033 | <b>SLC5A3</b>   | solute carrier family 5 (sodium/myo-inositol cotransporter), member 3           | 2.59  | 0.60  |
| 2786322 | <b>SLC7A11</b>  | solute carrier family 7, (cationic amino acid transporter, y+ system) member 11 | 1.76  | 2.01  |
| 3718555 | <b>SLFN5</b>    | schlafen family member 5                                                        | 1.23  | 0.70  |
| 2720584 | <b>SLIT2</b>    | slit homolog 2 (Drosophila)                                                     | 1.49  | -1.16 |
| 3598959 | <b>SMAD3</b>    | SMAD family member 3                                                            | 0.64  | -1.30 |
| 3766960 | <b>SMURF2</b>   | SMAD specific E3 ubiquitin protein ligase 2                                     | 1.45  | 0.96  |
| 2403557 | <b>SNORA44</b>  | small nucleolar RNA, H/ACA box 44                                               | 0.59  | -0.68 |
| 3560617 | <b>SNX6</b>     | sorting nexin 6                                                                 | 0.82  | 0.88  |
| 3519309 | <b>SPRY2</b>    | sprouty homolog 2 (Drosophila)                                                  | 1.00  | 1.81  |
| 2879105 | <b>SPRY4</b>    | sprouty homolog 4 (Drosophila)                                                  | 0.83  | 0.88  |
| 3802129 | <b>SS18</b>     | synovial sarcoma translocation, chromosome 18                                   | 0.70  | 0.73  |
| 3355145 | <b>ST3GAL4</b>  | ST3 beta-galactoside alpha-2,3-sialyltransferase 4                              | -0.76 | -0.59 |
| 2402459 | <b>STMN1</b>    | stathmin 1                                                                      | 0.59  | -0.86 |
| 3770632 | <b>SUMO2</b>    | SMT3 suppressor of mif two 3 homolog 2 (S. cerevisiae)                          | 1.88  | -1.05 |
| 3716664 | <b>SUZ12P</b>   | suppressor of zeste 12 homolog pseudogene                                       | 0.71  | -0.92 |
| 2361154 | <b>SYT11</b>    | synaptotagmin XI                                                                | 0.89  | -0.87 |
| 3350830 | <b>TAGLN</b>    | transgelin                                                                      | -1.10 | -0.63 |
| 2649113 | <b>TIPARP</b>   | TCDD-inducible poly(ADP-ribose) polymerase                                      | 0.95  | 0.64  |
| 2925590 | <b>TMEM200A</b> | transmembrane protein 200A                                                      | 0.61  | 1.33  |
| 2725332 | <b>TMEM33</b>   | transmembrane protein 33                                                        | 0.73  | 0.73  |
| 3427767 | <b>TMPO</b>     | thymopoietin                                                                    | 0.65  | -1.63 |
| 3449068 | <b>TMTC1</b>    | transmembrane and tetratricopeptide repeat containing 1                         | 1.63  | 0.89  |
| 3653398 | <b>TNRC6A</b>   | trinucleotide repeat containing 6A                                              | 0.71  | -0.66 |
| 3762473 | <b>TOB1</b>     | transducer of ERBB2, 1                                                          | 0.63  | 0.64  |
| 3145149 | <b>TP53INP1</b> | tumor protein p53 inducible nuclear protein 1                                   | 0.72  | 1.06  |
| 3429460 | <b>TXNRD1</b>   | thioredoxin reductase 1                                                         | 0.63  | 0.60  |
| 3775842 | <b>TYMS</b>     | thymidylate synthetase                                                          | 0.66  | -2.13 |
| 2364155 | <b>UHMK1</b>    | U2AF homology motif (UHM) kinase 1                                              | 0.91  | -1.02 |
| 2491676 | <b>VAMP5</b>    | vesicle-associated membrane protein 5 (myobrevin)                               | -0.71 | -0.67 |
| 2477203 | <b>VIT</b>      | vitrin                                                                          | 0.73  | -1.05 |
| 3319937 | <b>WEE1</b>     | WEE1 homolog (S. pombe)                                                         | 0.60  | -1.19 |
| 2417390 | <b>WLS</b>      | wntless homolog (Drosophila)                                                    | 0.99  | 0.87  |
| 3708074 | <b>XAF1</b>     | XIAP associated factor 1                                                        | -0.86 | -0.83 |
| 3075531 | <b>ZC3HAV1L</b> | zinc finger CCCH-type, antiviral 1-like                                         | 0.93  | 1.06  |
| 3801943 | <b>ZNF521</b>   | zinc finger protein 521                                                         | 0.79  | 1.61  |

Cutoff for significantly differentially expressed mRNAs: absolute expression ratio (ER)  $\geq 1.5$  and false discovery rate (FDR)  $< 0.05$ . Thus significantly differentially expressed genes have  $\log_2$  expression values of  $\geq |0.59|$ .

Up-regulated mRNAs are highlighted in red and down-regulated mRNAs are highlighted in green.

**Table S3. Gene Set Enrichment Analysis (GESA) detail**

| <b>C2: CGP (chemical and genetic perturbations, 3402 gene sets):<br/>cut-off p-value (intersect) &lt; 10E-8</b> | <b>BS vs. NM</b>               |                           | <b>BLM vs. NS</b>              |                           |
|-----------------------------------------------------------------------------------------------------------------|--------------------------------|---------------------------|--------------------------------|---------------------------|
|                                                                                                                 | <b>p-value<br/>(intersect)</b> | <b>p-value<br/>(GSEA)</b> | <b>p-value<br/>(intersect)</b> | <b>p-value<br/>(GSEA)</b> |
| <b>RODRIGUES_THYROID_CARCINOMA_ANAPLASTIC_UP</b>                                                                | 3.6E-45                        | 8.4E-03                   | 4.4E-24                        | 6.4E-03                   |
| <b>SENESE_HDAC3_TARGETS_UP</b>                                                                                  | 9.4E-39                        | 6.0E-04                   | 3.5E-12                        | 1.0E-04                   |
| <b>CHARAFE_BREAST_CANCER_LUMINAL_VS_MESENCHYMAL_DN</b>                                                          | 2.2E-38                        | 3.1E-03                   | 1.3E-22                        | 1.0E-04                   |
| <b>SENESE_HDAC1_TARGETS_UP</b>                                                                                  | 1.4E-29                        | 3.0E-04                   | 7.2E-11                        | 1.0E-04                   |
| <b>ONKEN_UVEAL_MELANOMA_UP</b>                                                                                  | 4.5E-23                        | 5.5E-03                   | n.s.                           | 1.0E-04                   |
| <b>NUYTEN_NIPP1_TARGETS_DN</b>                                                                                  | 6.1E-23                        | 1.0E-04                   | 6.5E-13                        | 1.0E-04                   |
| <b>ACEVEDO_LIVER_CANCER_UP</b>                                                                                  | 8.6E-22                        | 8.0E-03                   | n.s.                           | 4.0E-04                   |
| <b>BORCZUK_MALIGNANT_MESOTHELIOMA_UP</b>                                                                        | 7.3E-21                        | 6.1E-03                   | n.s.                           | 1.0E-04                   |
| <b>JIANG_HYPOXIA_NORMAL</b>                                                                                     | 1.4E-19                        | 7.0E-04                   | n.s.                           | 1.0E-04                   |
| <b>KIM_ALL_DISORDERS_CALB1_CORR_UP</b>                                                                          | 1.7E-19                        | 9.1E-03                   | n.s.                           | 1.0E-04                   |
| <b>GENTILE_UV_HIGH_DOSE_DN</b>                                                                                  | 5.3E-17                        | 3.7E-03                   | 5.8E-12                        | 1.0E-04                   |
| <b>GRUETZMANN_PANCREATIC_CANCER_UP</b>                                                                          | 9.2E-17                        | 4.1E-03                   | 1.1E-11                        | 1.0E-04                   |
| <b>BUYTAERT_PHOTODYNAMIC_THERAPY_STRESS_UP</b>                                                                  | 3.3E-16                        | 4.7E-03                   | n.s.                           | 1.0E-04                   |
| <b>LAIHO_COLORECTAL_CANCER_SERRATED_UP</b>                                                                      | 3.7E-16                        | 6.3E-03                   | n.s.                           | 1.0E-04                   |
| <b>FORTSCHEGGER_PHF8_TARGETS_DN</b>                                                                             | 7.1E-16                        | 3.3E-03                   | n.s.                           | 1.0E-04                   |
| <b>THUM_SYSTOLIC_HEART_FAILURE_UP</b>                                                                           | 4.2E-15                        | 2.2E-03                   | n.s.                           | 1.0E-04                   |
| <b>MARTINEZ_RESPONSE_TO TRABECTEDIN_DN</b>                                                                      | 5.0E-14                        | 5.3E-03                   | n.s.                           | 3.3E-03                   |
| <b>MARTINEZ_RB1_AND_TP53_TARGETS_UP</b>                                                                         | 5.1E-14                        | 3.0E-04                   | n.s.                           | 1.0E-04                   |
| <b>WANG_TUMOR_INVASIVENESS_DN</b>                                                                               | 1.6E-13                        | 1.2E-03                   | n.s.                           | 1.0E-04                   |
| <b>MARTINEZ_TP53_TARGETS_UP</b>                                                                                 | 1.7E-13                        | 4.0E-04                   | n.s.                           | 1.0E-04                   |
| <b>DURCHDEWALD_SKIN_CARCINOGENESIS_DN</b>                                                                       | 3.3E-13                        | 7.0E-04                   | n.s.                           | 1.0E-04                   |
| <b>NAKAMURA_TUMOR_ZONE_PERIPHERAL_VS_CENTRAL_DN</b>                                                             | 3.7E-13                        | 9.6E-03                   | n.s.                           | 1.0E-04                   |
| <b>FLECHNER_BIOPSY_KIDNEY_TRANSPLANT_REJECTED_VS_OK_DN</b>                                                      | 1.2E-12                        | 5.5E-03                   | n.s.                           | 1.0E-04                   |
| <b>TOOKER_GEMCITABINE_RESISTANCE_DN</b>                                                                         | 4.1E-12                        | 9.0E-04                   | n.s.                           | 1.0E-04                   |
| <b>JI_RESPONSE_TO_FSH_DN</b>                                                                                    | 5.9E-12                        | 2.1E-03                   | n.s.                           | 3.7E-03                   |
| <b>WANG_LMO4_TARGETS_UP</b>                                                                                     | 1.3E-11                        | 5.0E-03                   | n.s.                           | 5.9E-03                   |
| <b>RODRIGUES_THYROID_CARCINOMA_DN</b>                                                                           | 1.6E-11                        | 2.3E-03                   | n.s.                           | 1.0E-04                   |
| <b>ONDER_CDH1_TARGETS_1_DN</b>                                                                                  | 2.9E-11                        | 1.2E-03                   | n.s.                           | 1.0E-03                   |
| <b>MARTINEZ_RB1_TARGETS_UP</b>                                                                                  | 4.0E-11                        | 2.9E-03                   | n.s.                           | 1.0E-04                   |
| <b>ALONSO_METASTASIS_UP</b>                                                                                     | 7.7E-11                        | 6.1E-03                   | n.s.                           | 1.0E-04                   |
| <b>BROWNE_HCMV_INFECTION_14HR_DN</b>                                                                            | 3.5E-10                        | 3.0E-03                   | n.s.                           | 1.0E-04                   |
| <b>CREIGHTON_ENDOCRINE_THERAPY_RESISTANCE_3</b>                                                                 | 4.3E-10                        | 7.1E-03                   | n.s.                           | 8.0E-04                   |
| <b>LU_EZH2_TARGETS_DN</b>                                                                                       | 2.0E-09                        | 4.3E-03                   | 8.3E-09                        | 2.0E-04                   |
| <b>DAZARD_RESPONSE_TO_UV_SCC_UP</b>                                                                             | 2.1E-09                        | 4.6E-03                   | n.s.                           | 2.0E-04                   |
| <b>HEDENFALK_BREAST_CANCER_BRCA1_VS_BRCA2</b>                                                                   | 2.8E-09                        | 5.5E-03                   | n.s.                           | 1.0E-04                   |
| <b>BENPORATH_NANOG_TARGETS</b>                                                                                  | 3.3E-09                        | 5.6E-03                   | 1.7E-11                        | 1.0E-04                   |
| <b>KYNG_WERNER_SYNDROM_AND_NORMAL_AGING_DN</b>                                                                  | 3.8E-09                        | 3.2E-03                   | n.s.                           | 1.0E-04                   |
| <b>JIANG_HYPOXIA_VIA_VHL</b>                                                                                    | 4.7E-09                        | 1.0E-03                   | n.s.                           | 1.6E-03                   |
| <b>SCHAEFFER_PROSTATE_DEVELOPMENT_6HR_DN</b>                                                                    | 1.1E-08                        | 6.4E-03                   | n.s.                           | 1.0E-04                   |
| <b>BENPORATH_NOS_TARGETS</b>                                                                                    | n.s.                           | 1.0E-04                   | 5.3E-11                        | 1.0E-04                   |

  

| <b>C2: CP (canonical pathways, 1320 gene sets): cut-off p-value (intersect) &lt; 0.05</b> | <b>BS vs. NM</b>               |                           | <b>BLM vs. NS</b>              |                           |
|-------------------------------------------------------------------------------------------|--------------------------------|---------------------------|--------------------------------|---------------------------|
|                                                                                           | <b>p-value<br/>(intersect)</b> | <b>p-value<br/>(GSEA)</b> | <b>p-value<br/>(intersect)</b> | <b>p-value<br/>(GSEA)</b> |
| <b>PID_ERBB1_DOWNSTREAM_PATHWAY</b>                                                       | 5.2E-07                        | 2.3E-03                   | n.s.                           | 1.0E-04                   |
| <b>BIOCARTA_TEL_PATHWAY</b>                                                               | 9.0E-06                        | 1.0E-03                   | n.s.                           | 1.0E-04                   |
| <b>PID_RET_PATHWAY</b>                                                                    | 1.4E-05                        | 2.0E-04                   | n.s.                           | 1.0E-04                   |
| <b>PID_TGFBRPATHWAY</b>                                                                   | 4.0E-05                        | 3.5E-03                   | n.s.                           | 6.7E-03                   |
| <b>PID_MET_PATHWAY</b>                                                                    | 4.6E-05                        | 2.1E-03                   | n.s.                           | 1.0E-04                   |
| <b>REACTOME_PRE_NOTCH_EXPRESSION_AND_PROCESSING</b>                                       | 5.4E-05                        | 1.7E-03                   | 3.5E-02                        | 6.3E-03                   |
| <b>REACTOME_ACTIVATION_OF_RAC</b>                                                         | 9.8E-05                        | 2.6E-03                   | n.s.                           | 4.0E-04                   |
| <b>REACTOME_SIGNALING_BY_TGF_BETA_RECEPTOR_COMPLEX</b>                                    | 1.1E-04                        | 3.0E-04                   | 3.5E-02                        | 1.0E-04                   |
| <b>BIOCARTA_AT1R_PATHWAY</b>                                                              | 1.3E-04                        | 3.5E-03                   | n.s.                           | 1.0E-04                   |
| <b>REACTOME_SIGNALING_BY_NOTCH</b>                                                        | 1.6E-04                        | 8.2E-03                   | 1.4E-02                        | 1.0E-04                   |
| <b>PID_EPHBFWDPATHWAY</b>                                                                 | 1.8E-04                        | 3.3E-03                   | n.s.                           | 3.6E-03                   |
| <b>REACTOME_SEMAPHORIN_INTERACTIONS</b>                                                   | 1.8E-04                        | 6.7E-03                   | 4.7E-02                        | 1.0E-04                   |
| <b>REACTOME_DOWNREGULATION_OF_TGF_BETA_RECEPTOR_SIGNALING</b>                             | 2.0E-04                        | 8.6E-03                   | n.s.                           | 1.0E-04                   |
| <b>REACTOME_PRE_NOTCH_TRANSCRIPTION_AND_TRANSLATION</b>                                   | 2.7E-04                        | 3.0E-04                   | 1.5E-02                        | 1.0E-04                   |
| <b>BIOCARTA_AGR_PATHWAY</b>                                                               | 3.6E-04                        | 6.7E-03                   | n.s.                           | 4.0E-04                   |
| <b>REACTOME_SIGNALING_BY_EGFR_IN_CANCER</b>                                               | 4.3E-04                        | 6.2E-03                   | n.s.                           | 2.0E-04                   |

|                                           |         |         |         |         |
|-------------------------------------------|---------|---------|---------|---------|
| PID_ILK_PATHWAY                           | 5.1E-04 | 7.5E-03 | n.s.    | 1.0E-04 |
| PID_NFAT_3PATHWAY                         | 5.2E-04 | 4.0E-04 | n.s.    | 1.0E-04 |
| <b>BIOCARTA_ARF_PATHWAY</b>               | 5.6E-04 | 1.6E-03 | 3.7E-02 | 1.0E-04 |
| BIOCARTA_SPRY_PATHWAY                     | 5.6E-04 | 2.0E-04 | n.s.    | 1.0E-04 |
| PID_A6B1_A6B4_INTEGRIN_PATHWAY            | 6.2E-04 | 4.8E-03 | n.s.    | 1.0E-04 |
| PID_FGF_PATHWAY                           | 2.7E-03 | 4.1E-03 | n.s.    | 2.0E-04 |
| REACTOME_SPRY_REGULATION_OF_FGF_SIGNALING | 4.4E-03 | 2.0E-03 | n.s.    | 2.4E-03 |
| KEGG_CHRONIC_MYELOID_LEUKEMIA             | 7.8E-03 | 9.3E-03 | n.s.    | 1.0E-04 |
| ST_DIFFERENTIATION_PATHWAY_IN_PC12_CELLS  | 8.9E-03 | 5.4E-03 | n.s.    | 5.3E-03 |
| PID_P53REGULATIONPATHWAY                  | 1.4E-02 | 1.2E-03 | n.s.    | 1.0E-04 |
| BIOCARTA_PTDINS_PATHWAY                   | 1.6E-02 | 2.8E-03 | n.s.    | 1.0E-04 |
| PID_INTEGRIN_A4B1_PATHWAY                 | 1.7E-02 | 3.9E-03 | n.s.    | 1.0E-04 |
| REACTOME_METABOLISM_OF_CARBOHYDRATES      | 2.1E-02 | 5.0E-03 | n.s.    | 1.0E-04 |
| <b>PID_P38GAMMADELTAPATHWAY</b>           | 3.2E-02 | 5.8E-03 | 4.7E-02 | 1.0E-04 |
| PID_ERBB1_INTERNALIZATION_PATHWAY         | 4.7E-02 | 6.0E-04 | n.s.    | 1.0E-04 |
| REACTOME_SIGNALLING_BY_NGF                | n.s.    | 8.8E-03 | 1.6E-02 | 1.0E-04 |

| <b>C3: MIR (microRNA targets, 221 gene sets): cut-off p-value (intersect) &lt; 0.05</b>                                 | <b>BS vs. NM</b>           |                       | <b>BLM vs. NS</b>          |                       |
|-------------------------------------------------------------------------------------------------------------------------|----------------------------|-----------------------|----------------------------|-----------------------|
|                                                                                                                         | <b>p-value (intersect)</b> | <b>p-value (GSEA)</b> | <b>p-value (intersect)</b> | <b>p-value (GSEA)</b> |
| <b>MIR-224</b>                                                                                                          | 5.1E-14                    | 1.0E-04               | 5.8E-05                    | 1.0E-04               |
| <b>MIR-17-5P,MIR-20A,MIR-106A,MIR-106B,MIR-20B,MIR-519D</b>                                                             | 9.6E-11                    | 1.2E-03               | 2.7E-05                    | 1.0E-04               |
| MIR-124A                                                                                                                | 1.2E-10                    | 1.7E-03               | n.s.                       | 2.9E-03               |
| <b>MIR-1,MIR-206</b>                                                                                                    | 2.4E-10                    | 9.0E-04               | 6.2E-04                    | 1.0E-04               |
| <b>MIR-9</b>                                                                                                            | 1.0E-09                    | 7.0E-04               | 4.0E-04                    | 1.0E-04               |
| <b>MIR-320</b>                                                                                                          | 5.4E-09                    | 1.9E-03               | 1.7E-02                    | 9.0E-04               |
| <b>MIR-409-3P</b>                                                                                                       | 2.6E-07                    | 6.0E-03               | 1.7E-02                    | 1.0E-04               |
| <b>MIR-520F</b>                                                                                                         | 8.0E-06                    | 2.8E-03               | 6.7E-04                    | 1.0E-04               |
| <b>MIR-520G,MIR-520H</b>                                                                                                | 8.0E-05                    | 2.6E-03               | 4.3E-04                    | 1.0E-04               |
| MIR-518C                                                                                                                | 8.6E-05                    | 6.8E-03               | n.s.                       | 1.0E-04               |
| MIR-365                                                                                                                 | 1.8E-04                    | 2.7E-03               | n.s.                       | 8.5E-03               |
| <b>MIR-519E</b>                                                                                                         | 3.2E-04                    | 3.7E-03               | 3.9E-02                    | 6.2E-03               |
| MIR-221,MIR-222                                                                                                         | 5.8E-04                    | 1.7E-03               | n.s.                       | 4.0E-04               |
| MIR-199A,MIR-199B                                                                                                       | 6.1E-04                    | 3.5E-03               | n.s.                       | 1.1E-03               |
| <b>MIR-93,MIR-302A,MIR-302B,MIR-302C,MIR-302D,MIR-372,MIR-373,MIR-520E,MIR-520A,MIR-526B,MIR-520B,MIR-520C,MIR-520D</b> | 2.3E-03                    | 7.0E-04               | 4.2E-03                    | 1.0E-04               |
| MIR-212,MIR-132                                                                                                         | 3.4E-03                    | 7.2E-03               | n.s.                       | 1.0E-04               |
| MIR-136                                                                                                                 | 9.5E-03                    | 2.9E-03               | n.s.                       | 4.0E-04               |
| MIR-150                                                                                                                 | 1.2E-02                    | 1.9E-03               | n.s.                       | 1.0E-04               |

| <b>C3: TFT (transcriptional factor targets, 615 gene sets): cut-off p-value (intersect) &lt; 0.05</b> | <b>BS vs. NM</b>           |                       | <b>BLM vs. NS</b>          |                       |
|-------------------------------------------------------------------------------------------------------|----------------------------|-----------------------|----------------------------|-----------------------|
|                                                                                                       | <b>p-value (intersect)</b> | <b>p-value (GSEA)</b> | <b>p-value (intersect)</b> | <b>p-value (GSEA)</b> |
| MGGAAGTG_V\$GABP_B                                                                                    | 3.4E-06                    | 6.4E-03               | n.s.                       | 3.0E-04               |
| <b>TTANTCA_UNKNOWN</b>                                                                                | 1.2E-05                    | 5.0E-04               | 1.6E-05                    | 7.0E-04               |
| <b>SMTTTTGT_UNKNOWN</b>                                                                               | 6.5E-05                    | 1.6E-03               | 2.6E-03                    | 1.0E-04               |
| <b>V\$MYB_Q5_01</b>                                                                                   | 2.2E-04                    | 3.1E-03               | 4.7E-03                    | 1.0E-04               |
| V\$SRF_C                                                                                              | 1.2E-03                    | 4.2E-03               | n.s.                       | 1.0E-04               |
| V\$USF_Q6                                                                                             | 1.3E-03                    | 3.9E-03               | n.s.                       | 1.0E-04               |
| <b>GCTNWTGK_UNKNOWN</b>                                                                               | 1.4E-03                    | 6.1E-03               | 7.6E-03                    | 1.0E-04               |
| V\$CHOP_01                                                                                            | 1.7E-03                    | 5.2E-03               | n.s.                       | 1.2E-03               |
| <b>TGCGCANK_UNKNOWN</b>                                                                               | 2.3E-03                    | 9.0E-03               | 4.6E-02                    | 1.0E-04               |
| YGCGYRCGC_UNKNOWN                                                                                     | 3.2E-03                    | 3.8E-03               | n.s.                       | 1.0E-04               |
| <b>V\$FOXO1_02</b>                                                                                    | 3.3E-03                    | 5.8E-03               | 2.9E-06                    | 1.0E-04               |
| <b>V\$E4BP4_01</b>                                                                                    | 3.6E-03                    | 7.0E-04               | 2.0E-02                    | 7.6E-03               |
| <b>ATGGYGGA_UNKNOWN</b>                                                                               | 6.4E-03                    | 1.6E-03               | 4.3E-02                    | 1.8E-03               |
| V\$CREB_Q2_01                                                                                         | 7.2E-03                    | 1.0E-04               | n.s.                       | 1.0E-04               |
| V\$E4F1_Q6                                                                                            | 1.0E-02                    | 5.1E-03               | n.s.                       | 1.0E-04               |
| <b>V\$HTF_01</b>                                                                                      | 1.6E-02                    | 4.7E-03               | 6.0E-03                    | 1.0E-04               |
| V\$NRF1_Q6                                                                                            | 3.2E-02                    | 1.7E-03               | n.s.                       | 1.0E-04               |
| <b>V\$HIF1_Q3</b>                                                                                     | 4.0E-02                    | 7.0E-04               | 2.1E-02                    | 1.0E-04               |
| V\$BRN2_01                                                                                            | n.s.                       | 9.7E-03               | 3.1E-03                    | 6.1E-03               |
| V\$FREAC7_01                                                                                          | n.s.                       | 9.0E-04               | 3.8E-03                    | 1.0E-03               |
| V\$LXR_Q3                                                                                             | n.s.                       | 4.2E-03               | 1.3E-02                    | 1.0E-04               |



| <b>C4: CM (cancer modules, 431 gene sets): cut-off p-value (intersect) &lt; 0.05</b> | <b>BS vs. NM</b>           |                       | <b>BLM vs. NS</b>          |                       |
|--------------------------------------------------------------------------------------|----------------------------|-----------------------|----------------------------|-----------------------|
|                                                                                      | <b>p-value (intersect)</b> | <b>p-value (GSEA)</b> | <b>p-value (intersect)</b> | <b>p-value (GSEA)</b> |
| <b>MODULE_15</b>                                                                     | 9.3E-04                    | 1.8E-03               | 2.9E-09                    | 1.0E-04               |
| MODULE_56                                                                            | 1.7E-02                    | 5.6E-03               | n.s.                       | 3.7E-03               |
| MODULE_147                                                                           | 3.4E-06                    | 7.3E-03               | n.s.                       | 1.0E-04               |
| MODULE_166                                                                           | 1.5E-02                    | 3.5E-03               | n.s.                       | 9.1E-03               |
| MODULE_256                                                                           | 3.1E-02                    | 2.0E-04               | n.s.                       | 1.0E-04               |
| MODULE_69                                                                            | n.s.                       | 9.5E-03               | 9.2E-03                    | 1.0E-04               |
| MODULE_136                                                                           | n.s.                       | 9.2E-03               | 4.5E-02                    | 1.0E-04               |

| <b>C4: CGN (cancer gene neighborhoods, 427 gene sets): cut-off p-value (intersect) &lt; 0.05</b> | <b>BS vs. NM</b>           |                       | <b>BLM vs. NS</b>          |                       |
|--------------------------------------------------------------------------------------------------|----------------------------|-----------------------|----------------------------|-----------------------|
|                                                                                                  | <b>p-value (intersect)</b> | <b>p-value (GSEA)</b> | <b>p-value (intersect)</b> | <b>p-value (GSEA)</b> |
| MORF_RAB6A                                                                                       | 8.0E-10                    | 9.1E-03               | n.s.                       | 5.2E-03               |
| GCM_BCL2L1                                                                                       | 1.7E-02                    | 2.7E-03               | n.s.                       | 1.0E-04               |

| <b>C5: BP (GO Biological Process Ontology, 825 gene sets): cut-off p-value (intersect) &lt; 0.05</b> | <b>BS vs. NM</b>           |                       | <b>BLM vs. NS</b>          |                       |
|------------------------------------------------------------------------------------------------------|----------------------------|-----------------------|----------------------------|-----------------------|
|                                                                                                      | <b>p-value (intersect)</b> | <b>p-value (GSEA)</b> | <b>p-value (intersect)</b> | <b>p-value (GSEA)</b> |
| MACROMOLECULAR_COMPLEX_ASSEMBLY                                                                      | 1.2E-06                    | 2.2E-03               | n.s.                       | 1.0E-04               |
| REGULATION_OF_METABOLIC_PROCESS                                                                      | 4.4E-06                    | 3.0E-03               | n.s.                       | 1.4E-03               |
| CELLULAR_COMPONENT_ASSEMBLY                                                                          | 6.1E-06                    | 2.5E-03               | n.s.                       | 1.0E-04               |
| REGULATION_OF_CELLULAR_METABOLIC_PROCESS                                                             | 7.9E-06                    | 2.7E-03               | n.s.                       | 2.7E-03               |
| TRANSFORMING_GROWTH_FACTOR_BETA_RECEPTOR_SIGNALING_PATHWAY                                           | 8.5E-05                    | 6.0E-03               | n.s.                       | 2.0E-04               |
| REGULATION_OF_CELLULAR_COMPONENT_ORGANIZATION_AND_BIOGENESIS                                         | 8.6E-05                    | 2.5E-03               | n.s.                       | 1.0E-04               |
| POSITIVE_REGULATION_OF_CELLULAR_PROCESS                                                              | 9.8E-05                    | 6.9E-03               | n.s.                       | 1.0E-04               |
| PROTEIN_KINASE_CASCADE                                                                               | 1.4E-04                    | 9.4E-03               | n.s.                       | 1.0E-04               |
| REGULATION_OF_TRANSFORMING_GROWTH_FACTOR_BETA_RECEPTOR_SIGNALING_PATHWAY                             | 1.6E-04                    | 8.3E-03               | 3.0E-03                    | 1.0E-04               |
| ENZYME_LINKED_RECEPTOR_PROTEIN_SIGNALING_PATHWAY                                                     | 3.1E-04                    | 1.0E-04               | 1.9E-02                    | 1.0E-04               |
| BIOPOLYMER_MODIFICATION                                                                              | 4.9E-04                    | 5.5E-03               | n.s.                       | 1.0E-04               |
| NEGATIVE_REGULATION_OF_TRANSCRIPTION                                                                 | 7.5E-04                    | 5.3E-03               | n.s.                       | 1.0E-04               |
| NEGATIVE_REGULATION_OF_CELLULAR_COMPONENT_ORGANIZATION_AND_BIOGENESIS                                | 1.2E-03                    | 6.8E-03               | n.s.                       | 1.0E-04               |
| VESICLE_MEDIATED_TRANSPORT                                                                           | 1.5E-03                    | 5.8E-03               | n.s.                       | 1.0E-04               |
| NEGATIVE_REGULATION_OF_NUCLEOBASENUCLEOSIDENUCLEOTIDE_AND_NUCLEIC_ACID_METABOLIC_PROCESS             | 1.9E-03                    | 8.4E-03               | 3.6E-02                    | 1.0E-04               |
| REGULATION_OF_I_KAPPAB_KINASE_NF_KAPPAB_CASCADE                                                      | 5.9E-03                    | 8.6E-03               | 4.0E-02                    | 1.0E-04               |
| POSITIVE_REGULATION_OF_I_KAPPAB_KINASE_NF_KAPPAB_CASCADE                                             | 8.6E-03                    | 9.7E-03               | 2.5E-02                    | 1.0E-04               |
| REGULATION_OF_TRANSFERASE_ACTIVITY                                                                   | 1.9E-02                    | 2.5E-03               | 3.7E-02                    | 1.0E-04               |
| REGULATION_OF_PROTEIN_KINASE_ACTIVITY                                                                | 2.6E-02                    | 2.4E-03               | n.s.                       | 1.0E-04               |
| REGULATION_OF_KINASE_ACTIVITY                                                                        | 2.9E-02                    | 2.5E-03               | n.s.                       | 1.0E-04               |
| REGULATION_OF_CYCLIN_DEPENDENT_PROTEIN_KINASE_ACTIVITY                                               | n.s.                       | 9.7E-03               | n.s.                       | 1.0E-04               |
| NEGATIVE_REGULATION_OF_CELL_ADHESION                                                                 | n.s.                       | 9.2E-03               | n.s.                       | 1.0E-04               |

| <b>C5: CC (GO cellular component, 233 gene sets): cut-off p-value (intersect) &lt; 0.05</b> | <b>BS vs. NM</b>           |                       | <b>BLM vs. NS</b>          |                       |
|---------------------------------------------------------------------------------------------|----------------------------|-----------------------|----------------------------|-----------------------|
|                                                                                             | <b>p-value (intersect)</b> | <b>p-value (GSEA)</b> | <b>p-value (intersect)</b> | <b>p-value (GSEA)</b> |
| ER_GOLGI_INTERMEDIATE_COMPARTMENT                                                           | 1.3E-06                    | 4.0E-04               | n.s.                       | 1.0E-04               |

| <b>C5: MF (GO molecular function, 396 gene sets): cut-off p-value (intersect) &lt; 0.05</b> | <b>BS vs. NM</b>           |                       | <b>BLM vs. NS</b>          |                       |
|---------------------------------------------------------------------------------------------|----------------------------|-----------------------|----------------------------|-----------------------|
|                                                                                             | <b>p-value (intersect)</b> | <b>p-value (GSEA)</b> | <b>p-value (intersect)</b> | <b>p-value (GSEA)</b> |
| GTPASE_ACTIVITY                                                                             | 1.6E-04                    | 8.2E-03               | n.s.                       | 1.0E-04               |
| SMAD_BINDING                                                                                | 6.3E-03                    | 4.6E-03               | n.s.                       | 1.0E-04               |
| <b>PROTEIN_KINASE_ACTIVITY</b>                                                              | 7.2E-03                    | 2.8E-03               | 1.7E-02                    | 1.0E-04               |
| TRANSITION_METAL_ION_BINDING                                                                | 1.2E-02                    | 7.6E-03               | n.s.                       | 1.0E-04               |
| <b>NUCLEOTIDE_BINDING</b>                                                                   | 2.8E-02                    | 1.0E-03               | 4.0E-02                    | 1.0E-04               |
| PURINE_NUCLEOTIDE_BINDING                                                                   | 2.8E-02                    | 1.2E-03               | n.s.                       | 1.0E-04               |
| PURINE_RIBONUCLEOTIDE_BINDING                                                               | 4.1E-02                    | 1.5E-03               | n.s.                       | 1.0E-04               |
| S_ADENOSYLMETHIONINE_DEPENDENT_METHYLTRANSFERASE_ACTIVITY                                   | n.s.                       | 3.9E-03               | 6.6E-03                    | 9.1E-03               |

| C6: Oncogenic signatures (189 gene sets): cut-off p-value (intersect) < 0.05 | BS vs. NM           |                | BLM vs. NS          |                |
|------------------------------------------------------------------------------|---------------------|----------------|---------------------|----------------|
|                                                                              | p-value (intersect) | p-value (GSEA) | p-value (intersect) | p-value (GSEA) |
| CAMP_UP.V1_DN                                                                | 2.1E-10             | 2.0E-04        | 1.3E-02             | 8.0E-04        |
| STK33_UP                                                                     | 2.3E-09             | 3.8E-03        | 2.3E-08             | 1.0E-04        |

| C7: Immunologic signatures (1910 gene sets): cut-off p-value (intersect) < 0.05 | BS vs. NM           |                | BLM vs. NS          |                |
|---------------------------------------------------------------------------------|---------------------|----------------|---------------------|----------------|
|                                                                                 | p-value (intersect) | p-value (GSEA) | p-value (intersect) | p-value (GSEA) |
| GSE17721_12H_VS_24H_POLYIC_BMDM_UP                                              | 1.0E-13             | 2.6E-03        | 9.2E-03             | 1.0E-04        |
| GSE9006_HEALTHY_VS_TYPE_1_DIABETES_PBMC_AT_DX_UP                                | 2.8E-11             | 1.8E-03        | n.s.                | 2.0E-04        |
| GSE22886_NAIVE_VS_MEMORY_TCELL_DN                                               | 2.8E-11             | 1.0E-03        | 1.8E-04             | 1.0E-04        |
| GSE17721_CTRL_VS_GARDIQUIMOD_0.5H_BMDM_UP                                       | 3.9E-11             | 7.0E-04        | n.s.                | 1.0E-04        |
| GSE17721_0.5H_VS_4H_PAM3CSK4_BMDM_DN                                            | 4.6E-11             | 5.5E-03        | 3.4E-02             | 7.0E-04        |
| GSE10239_MEMORY_VS_KLRG1HIGH_EFF_CD8_TCELL_DN                                   | 7.7E-11             | 9.6E-03        | 1.6E-07             | 1.0E-04        |
| GSE20715_WT_VS_TLR4_KO_LUNG_UP                                                  | 4.8E-09             | 8.8E-03        | n.s.                | 4.0E-04        |
| GSE17721_POLYIC_VS_PAM3CSK4_4H_BMDM_DN                                          | 7.4E-09             | 1.0E-03        | n.s.                | 1.0E-04        |
| GSE39820_TGFBETA3_IL6_VS_TGFBETA3_IL6_IL23A_TREATED_CD4_TCELL_UP                | 1.1E-08             | 9.1E-03        | 3.3E-03             | 9.0E-04        |
| GSE22886_NAIVE_BCELL_VS_DC_DN                                                   | 4.4E-08             | 7.6E-03        | n.s.                | 1.0E-04        |
| GSE27786_BCELL_VS_NKCELL_DN                                                     | 9.6E-08             | 3.2E-03        | n.s.                | 4.4E-03        |
| GSE339_EX_VIVO_VS_IN_CULTURE_CD4POS_DC_DN                                       | 9.6E-08             | 3.7E-03        | n.s.                | 3.2E-03        |
| GSE9006_HEALTHY_VS_TYPE_1_DIABETES_PBMC_4MONTH_POST_DX_UP                       | 9.6E-08             | 4.2E-03        | 1.9E-02             | 1.0E-04        |
| GSE22886_NAIVE_CD8_TCELL_VS_MEMORY_TCELL_DN                                     | 1.2E-07             | 7.0E-04        | 5.8E-05             | 1.0E-04        |
| GSE17721_LPS_VS_POLYIC_16H_BMDM_UP                                              | 1.8E-07             | 4.2E-03        | 4.7E-02             | 7.0E-03        |
| GSE17721_POLYIC_VS_CPG_16H_BMDM_DN                                              | 1.8E-07             | 3.9E-03        | n.s.                | 1.0E-04        |
| GSE3982_MAST_CELL_VS_NKCELL_UP                                                  | 1.8E-07             | 9.1E-03        | n.s.                | 1.0E-04        |
| GSE17721_POLYIC_VS_GARDIQUIMOD_1H_BMDM_DN                                       | 2.4E-07             | 4.0E-03        | n.s.                | 2.0E-04        |
| GSE22886_NAIVE_TCELL_VS_NEUTROPHIL_UP                                           | 2.4E-07             | 8.5E-03        | n.s.                | 4.4E-03        |
| GSE39820_TGFBETA1_IL6_VS_TGFBETA1_IL6_IL23A_TREATED_CD4_TCELL_UP                | 4.4E-07             | 3.0E-04        | n.s.                | 1.0E-04        |
| GSE7460_CTRL_VS_TGFB_TREATED_ACT_FOXP3_HET_TCONV_UP                             | 4.4E-07             | 1.0E-04        | n.s.                | 1.0E-04        |
| GSE17721_LPS_VS_GARDIQUIMOD_24H_BMDM_DN                                         | 6.4E-07             | 1.6E-03        | 2.0E-04             | 1.0E-04        |
| GSE17721_POLYIC_VS_GARDIQUIMOD_4H_BMDM_DN                                       | 6.4E-07             | 1.9E-03        | n.s.                | 1.0E-04        |
| GSE17721_POLYIC_VS_CPG_2H_BMDM_DN                                               | 9.3E-07             | 9.8E-03        | n.s.                | 6.0E-04        |
| GSE3982_EOSINOPHIL_VS_NKCELL_UP                                                 | 1.2E-06             | 6.7E-03        | 6.6E-03             | 1.0E-04        |
| GSE3982_BASOPHIL_VS_CENT_MEMORY_CD4_TCELL_UP                                    | 1.7E-06             | 1.5E-03        | 2.0E-03             | 1.0E-04        |
| GSE339_EX_VIVO_VS_IN_CULTURE_CD8POS_DC_UP                                       | 2.2E-06             | 1.0E-03        | 1.7E-02             | 1.0E-04        |
| GSE13484_UNSTIM_VS_YF17D_VACCINE_STIM_PBMC_UP                                   | 2.4E-06             | 3.9E-03        | n.s.                | 3.0E-03        |
| GSE17721_LPS_VS_GARDIQUIMOD_16H_BMDM_DN                                         | 2.7E-06             | 5.4E-03        | 6.1E-04             | 1.0E-04        |
| GSE17721_CTRL_VS_LPS_4H_BMDM_UP                                                 | 4.5E-06             | 8.6E-03        | 4.5E-02             | 1.0E-04        |
| GSE9037_CTRL_VS_LPS_4H_STIM_BMDM_UP                                             | 5.0E-06             | 9.5E-03        | n.s.                | 1.0E-04        |
| GSE11057_NAIVE_VS_CENT_MEMORY_CD4_TCELL_DN                                      | 5.6E-06             | 9.7E-03        | n.s.                | 1.0E-04        |
| GSE12845_IGD_NEG_BLOOD_VS_DARKZONE_GC_TONSIL_BCELL_DN                           | 6.2E-06             | 7.5E-03        | n.s.                | 2.0E-04        |
| GSE17580_UNINFECTED_VS_S_MANSONI_INF_TREG_DN                                    | 7.7E-06             | 9.0E-04        | 5.4E-03             | 1.0E-04        |
| GSE29618_BCELL_VS_PDC_DAY7_FLU_VACCINE_DN                                       | 1.7E-05             | 4.6E-03        | 4.7E-03             | 1.0E-04        |
| GSE11057_NAIVE_VS_EFF_MEMORY_CD4_TCELL_DN                                       | 1.8E-05             | 7.3E-03        | 5.0E-03             | 1.0E-04        |
| GSE14308_TH17_VS_NAIVE_CD4_TCELL_UP                                             | 2.0E-05             | 2.5E-03        | 2.6E-03             | 2.7E-03        |
| GSE20366_TREG_VS_NAIVE_CD4_TCELL_UP                                             | 2.0E-05             | 3.6E-03        | 2.1E-06             | 1.0E-04        |
| GSE13484_12H_UNSTIM_VS_YF17D_VACCINE_STIM_PBMC_UP                               | 2.1E-05             | 6.7E-03        | n.s.                | 8.5E-03        |
| GSE17721_CPG_VS_GARDIQUIMOD_6H_BMDM_DN                                          | 2.1E-05             | 6.1E-03        | n.s.                | 1.0E-04        |
| GSE17721_LPS_VS_PAM3CSK4_16H_BMDM_DN                                            | 2.8E-05             | 1.9E-03        | 1.6E-03             | 1.0E-04        |
| GSE360_L_DONOVANI_VS_B_MALAYI_LOW_DOSE_MAC_UP                                   | 3.7E-05             | 1.8E-03        | 4.7E-02             | 3.9E-03        |
| GSE7764_NKCELL_VS_SPLENOCYTE_UP                                                 | 5.5E-05             | 7.6E-03        | 1.9E-02             | 1.0E-04        |
| GSE39820_CTRL_VS_IL1B_IL6_CD4_TCELL_DN                                          | 8.0E-05             | 2.6E-03        | 6.3E-05             | 1.0E-04        |
| GSE7764_IL15_NK_CELL_24H_VS_SPLENOCYTE_DN                                       | 9.7E-05             | 6.5E-03        | 2.0E-03             | 1.0E-04        |
| GSE13484_UNSTIM_VS_3H_YF17D_VACCINE_STIM_PBMC_DN                                | 1.1E-04             | 6.8E-03        | n.s.                | 1.3E-03        |
| GSE9037_WT_VS_IRAK4_KO_LPS_4H_STIM_BMDM_UP                                      | 1.2E-04             | 9.3E-03        | 9.2E-03             | 4.0E-04        |
| GSE17721_POLYIC_VS_GARDIQUIMOD_16H_BMDM_UP                                      | 1.5E-04             | 7.8E-03        | n.s.                | 2.3E-03        |
| GSE13229_MATURE_VS_INTMATURE_NKCELL_DN                                          | 1.5E-04             | 3.3E-03        | n.s.                | 9.6E-03        |
| GSE39820_CTRL_VS_IL1B_IL6_CD4_TCELL_UP                                          | 1.5E-04             | 1.0E-04        | n.s.                | 1.0E-04        |
| GSE37416_CTRL_VS_12H_F_TULARENSIS_LVS_NEUTROPHIL_UP                             | 2.2E-04             | 3.0E-03        | 7.6E-03             | 1.0E-04        |
| GSE36476_CTRL_VS_TSST_ACT_72H_MEMORY_CD4_TCELL_YOUNG_UP                         | 2.4E-04             | 8.0E-04        | n.s.                | 1.0E-04        |
| GSE3982_MAST_CELL_VS_CENT_MEMORY_CD4_TCELL_UP                                   | 2.6E-04             | 7.2E-03        | 4.4E-03             | 1.0E-04        |
| GSE17721_LPS_VS_PAM3CSK4_6H_BMDM_UP                                             | 2.9E-04             | 1.4E-03        | n.s.                | 1.0E-04        |
| GSE27786_CD4_TCELL_VS_NKCELL_DN                                                 | 2.9E-04             | 6.0E-04        | n.s.                | 1.0E-04        |
| GSE16522_MEMORY_VS_NAIVE_ANTI_CD3CD28_STIM_CD8_TCELL_UP                         | 3.4E-04             | 2.8E-03        | n.s.                | 1.0E-04        |

|                                                                  |         |         |         |         |
|------------------------------------------------------------------|---------|---------|---------|---------|
| <b>GSE9650_NAIVE_VS_EXHAUSTED_CD8_TCELL_DN</b>                   | 3.4E-04 | 5.9E-03 | 2.7E-03 | 1.0E-04 |
| <b>GSE24634_NAIVE_CD4_TCELL_VS_DAY10_IL4_CONV_TREG_DN</b>        | 4.0E-04 | 1.0E-03 | 1.1E-10 | 1.0E-04 |
| GSE3982_MAC_VS_TH2_UP                                            | 4.0E-04 | 3.5E-03 | n.s.    | 2.8E-03 |
| <b>GSE24142_ADULT_VS_FETAL_DN3_THYMOCYTE_UP</b>                  | 4.7E-04 | 5.0E-03 | 7.1E-03 | 5.0E-04 |
| <b>GSE20366_CD103_KLRG1_DP_VS_DN_TREG_DN</b>                     | 5.3E-04 | 6.9E-03 | 1.7E-04 | 1.0E-04 |
| GSE360_CTRL_VS_M_TUBERCULOSIS_MAC_UP                             | 5.7E-04 | 1.9E-03 | n.s.    | 1.0E-04 |
| GSE17721_LPS_VS_GARDIQUIMOD_12H_BMDM_DN                          | 6.2E-04 | 3.1E-03 | n.s.    | 1.0E-04 |
| GSE27786_NKTCELL_VS_MONO_MAC_UP                                  | 6.4E-04 | 8.6E-03 | n.s.    | 1.0E-04 |
| GSE3982_EOSINOPHIL_VS_MAC_DN                                     | 6.7E-04 | 2.6E-03 | n.s.    | 1.0E-04 |
| GSE27786_ERYTHROBLAST_VS_NEUTROPHIL_DN                           | 8.5E-04 | 9.0E-04 | n.s.    | 1.0E-04 |
| <b>GSE12845_IGD_POS_BLOOD_VS_NAIVE_TONSIL_BCELL_DN</b>           | 9.1E-04 | 5.1E-03 | 2.1E-02 | 3.3E-03 |
| <b>GSE17721_LPS_VS_PAM3CSK4_4H_BMDM_UP</b>                       | 9.9E-04 | 3.7E-03 | 1.3E-02 | 1.0E-04 |
| GSE360_CTRL_VS_B_MALAYI_LOW_DOSE_DC_UP                           | 1.0E-03 | 4.0E-04 | n.s.    | 2.0E-04 |
| GSE17721_12H_VS_24H_GARDIQUIMOD_BMDM_DN                          | 1.5E-03 | 4.2E-03 | n.s.    | 1.3E-03 |
| <b>GSE9650_EFFECTOR_VS_EXHAUSTED_CD8_TCELL_DN</b>                | 2.0E-03 | 2.2E-03 | 7.2E-04 | 1.0E-04 |
| GSE27786_NKTCELL_VS_ERYTHROBLAST_UP                              | 2.1E-03 | 2.6E-03 | n.s.    | 1.0E-04 |
| <b>GSE24634_TREG_VS_TCONV_POST_DAY3_IL4_CONVERSION_DN</b>        | 2.2E-03 | 3.2E-03 | 3.4E-03 | 1.0E-04 |
| GSE17721_PAM3CSK4_VS_GADIQUIMOD_1H_BMDM_DN                       | 3.2E-03 | 7.2E-03 | n.s.    | 2.5E-03 |
| GSE27786_ERYTHROBLAST_VS_MONO_MAC_DN                             | 3.2E-03 | 8.3E-03 | n.s.    | 1.0E-04 |
| GSE3982_MAST_CELL_VS_MAC_DN                                      | 3.2E-03 | 8.3E-03 | n.s.    | 2.0E-04 |
| GSE3982_CTRL_VS_PMA_STIM_EOSINOPHIL_UP                           | 3.5E-03 | 6.5E-03 | n.s.    | 2.0E-04 |
| <b>GSE32423_IL7_VS_IL4_MEMORY_CD8_TCELL_UP</b>                   | 4.2E-03 | 8.0E-04 | 1.1E-04 | 1.0E-04 |
| <b>GSE17721_LPS_VS_CPG_12H_BMDM_UP</b>                           | 4.5E-03 | 9.1E-03 | 3.9E-02 | 1.0E-04 |
| GSE13484_12H_VS_3H_YF17D_VACCINE_STIM_PBMC_UP                    | 5.9E-03 | 2.0E-04 | n.s.    | 1.0E-04 |
| <b>GSE17721_LPS_VS_GARDIQUIMOD_8H_BMDM_UP</b>                    | 5.9E-03 | 3.5E-03 | 4.7E-02 | 1.0E-04 |
| <b>GSE39820_CTRL_VS_IL1B_IL6_IL23A_CD4_TCELL_UP</b>              | 5.9E-03 | 6.8E-03 | 1.8E-04 | 1.0E-04 |
| GSE360_CTRL_VS_B_MALAYI_HIGH_DOSE_MAC_UP                         | 6.2E-03 | 2.0E-04 | n.s.    | 2.0E-04 |
| GSE360_DC_VS_MAC_B_MALAYI_LOW_DOSE_UP                            | 7.1E-03 | 3.7E-03 | n.s.    | 4.0E-04 |
| <b>GSE32423_IL7_VS_IL7_IL4_MEMORY_CD8_TCELL_UP</b>               | 7.2E-03 | 1.1E-03 | 2.3E-03 | 1.0E-04 |
| GSE17721_LPS_VS_POLYIC_16H_BMDM_DN                               | 7.5E-03 | 1.3E-03 | n.s.    | 1.0E-04 |
| <b>GSE5463_CTRL_VS_DEXAMETHASONE_TREATED_THYMOCYTE_DN</b>        | 8.0E-03 | 4.7E-03 | 2.9E-03 | 6.8E-03 |
| GSE3982_NEUTROPHIL_VS_BASOPHIL_UP                                | 8.6E-03 | 1.9E-03 | n.s.    | 2.0E-04 |
| <b>GSE30962_ACUTE_VS_CHRONIC_LCMV_SECONDARY_INF_CD8_TCELL_UP</b> | 9.2E-03 | 8.1E-03 | 1.2E-02 | 1.0E-04 |
| GSE17721_LPS_VS_CPG_4H_BMDM_DN                                   | 9.8E-03 | 5.1E-03 | n.s.    | 2.0E-04 |
| GSE36476_YOUNG_VS_OLD_DONOR_MEMORY_CD4_TCELL_72H_TSST_ACT_DN     | 1.0E-02 | 9.5E-03 | n.s.    | 1.0E-03 |
| GSE360_HIGH_VS_LOW_DOSE_B_MALAYI_DC_UP                           | 1.1E-02 | 5.4E-03 | n.s.    | 1.8E-03 |
| GSE11864_CSF1_VS_CSF1_IFNG_PAM3CYS_IN_MAC_UP                     | 1.1E-02 | 1.5E-03 | n.s.    | 1.0E-04 |
| GSE24142_EARLY_THYMIC_PROGENITOR_VS_DN3_THYMOCYTE_FETAL_UP       | 1.2E-02 | 7.0E-04 | n.s.    | 1.0E-04 |
| <b>GSE36476_CTRL_VS_TSST_ACT_40H_MEMORY_CD4_TCELL_YOUNG_UP</b>   | 1.4E-02 | 2.0E-03 | 1.8E-02 | 8.0E-04 |
| GSE17721_LPS_VS_PAM3CSK4_8H_BMDM_DN                              | 1.6E-02 | 9.1E-03 | n.s.    | 5.0E-04 |
| <b>GSE27786_CD8_TCELL_VS_MONO_MAC_DN</b>                         | 2.0E-02 | 7.0E-04 | 3.6E-04 | 1.0E-04 |
| GSE17974_0.5H_VS_72H_UNTREATED_IN_VITRO_CD4_TCELL_UP             | 2.8E-02 | 4.6E-03 | n.s.    | 1.0E-04 |
| GSE37416_CTRL_VS_6H_F_TULARENSIS_LVS_NEUTROPHIL_UP               | 4.2E-02 | 1.1E-03 | n.s.    | 3.8E-03 |
| GSE360_DC_VS_MAC_UP                                              | 4.8E-02 | 6.8E-03 | n.s.    | 3.3E-03 |
| GSE17721_CTRL_VS_POLYIC_1H_BMDM_UP                               | 5.0E-02 | 6.3E-03 | n.s.    | 1.0E-04 |

Note:

p-value (intersect) is the p-value of a hypergeometric test for genes that were in common between BS-NM and BLM-NS data and were represented in statistically significant genesets.

p-value (GSEA) is the p-value of the Gene Set Enrichment Analysis (GSEA).

n.s.: not significant at the cut-off p-value (intersect). Common genesets between BS vs. NM and BLM vs. NS are highlighted in bold type.

**Table S4. Significantly differentially expressed miRNAs identified in BS or BLM-depleted fibroblasts**

| miRBase ID             | BS vs. NM |          |                  | BLM vs. NS |          |                  |
|------------------------|-----------|----------|------------------|------------|----------|------------------|
|                        | p-value   | FDR      | Expression Ratio | p-value    | FDR      | Expression Ratio |
| hsa-miR-181a-5p        | 5.85E-03  | 3.34E-02 | 2.60             | 3.42E-02   | n.s.     | n.s.             |
| hsa-miR-595            | 8.04E-04  | 1.03E-02 | 2.13             | n.s.       | n.s.     | n.s.             |
| <b>hsa-miR-30a-5p</b>  | 1.93E-03  | 1.76E-02 | 2.12             | n.s.       | n.s.     | n.s.             |
| <b>hsa-miR-30d-5p</b>  | 2.43E-03  | 2.00E-02 | 1.90             | n.s.       | n.s.     | n.s.             |
| <b>hsa-miR-155-5p</b>  | 1.67E-02  | 6.62E-02 | 1.90             | 3.99E-02   | n.s.     | n.s.             |
| hsa-miR-29b-3p         | 2.90E-02  | 9.94E-02 | 1.85             | n.s.       | n.s.     | n.s.             |
| hsa-miR-412            | 2.21E-03  | 1.89E-02 | 1.83             | n.s.       | n.s.     | n.s.             |
| <b>hsa-miR-130a-3p</b> | 5.19E-03  | 3.16E-02 | 1.79             | 4.70E-03   | 9.23E-02 | n.s.             |
| <b>hsa-miR-320a</b>    | 5.32E-04  | 7.67E-03 | 1.75             | n.s.       | n.s.     | n.s.             |
| <b>hsa-miR-484</b>     | 3.17E-03  | 2.12E-02 | 1.73             | n.s.       | n.s.     | n.s.             |
| <b>hsa-miR-29c-3p</b>  | 1.44E-02  | 6.06E-02 | 1.72             | n.s.       | n.s.     | n.s.             |
| hsa-miR-634            | 2.77E-03  | 2.05E-02 | 1.68             | 1.22E-02   | n.s.     | n.s.             |
| <b>hsa-miR-26b-5p</b>  | 6.29E-03  | 3.39E-02 | 1.68             | n.s.       | n.s.     | n.s.             |
| <b>hsa-miR-34a-5p</b>  | 1.10E-02  | 4.93E-02 | 1.67             | n.s.       | n.s.     | n.s.             |
| hsa-miR-199a-5p        | 2.14E-02  | 8.25E-02 | 1.63             | 1.52E-05   | 3.04E-03 | -1.68            |
| <b>hsa-miR-328</b>     | 1.66E-02  | 6.62E-02 | 1.63             | n.s.       | n.s.     | n.s.             |
| <b>hsa-miR-29a-3p</b>  | 2.38E-02  | 8.67E-02 | 1.62             | 4.43E-02   | n.s.     | n.s.             |
| <b>hsa-miR-130b-3p</b> | 2.69E-02  | 9.34E-02 | 1.56             | n.s.       | n.s.     | n.s.             |
| hsa-miR-103a-3p        | 5.81E-03  | 3.34E-02 | 1.51             | n.s.       | n.s.     | n.s.             |
| <b>hsa-miR-143-3p</b>  | 7.17E-03  | 3.64E-02 | -2.35            | 5.93E-04   | 3.16E-02 | -1.68            |
| <b>hsa-miR-499a-5p</b> | 2.50E-03  | 2.00E-02 | -2.05            | n.s.       | n.s.     | n.s.             |
| <b>hsa-miR-92b-3p</b>  | 3.14E-03  | 2.12E-02 | -1.92            | n.s.       | n.s.     | n.s.             |
| <b>hsa-miR-145-5p</b>  | 8.59E-04  | 1.03E-02 | -1.89            | 3.96E-03   | 8.55E-02 | -2.22            |
| <b>hsa-let-7c</b>      | 6.76E-05  | 2.65E-03 | -1.88            | n.s.       | n.s.     | n.s.             |
| <b>hsa-let-7b-5p</b>   | 5.27E-07  | 1.44E-04 | -1.88            | 3.27E-02   | n.s.     | n.s.             |
| <b>hsa-miR-632</b>     | 5.12E-04  | 7.67E-03 | -1.87            | n.s.       | n.s.     | n.s.             |
| <b>hsa-let-7e-5p</b>   | 2.55E-05  | 1.40E-03 | -1.86            | 5.01E-03   | 9.23E-02 | n.s.             |
| hsa-miR-129-5p         | 6.51E-03  | 3.43E-02 | -1.85            | n.s.       | n.s.     | n.s.             |
| hsa-miR-636            | 1.88E-05  | 1.29E-03 | -1.73            | n.s.       | n.s.     | n.s.             |
| <b>hsa-let-7d-5p</b>   | 7.92E-05  | 2.67E-03 | -1.71            | 3.51E-03   | 7.79E-02 | 1.80             |
| <b>hsa-let-7g-5p</b>   | 3.48E-03  | 2.22E-02 | -1.71            | n.s.       | n.s.     | n.s.             |
| <b>hsa-miR-638</b>     | 2.77E-03  | 2.05E-02 | -1.71            | n.s.       | n.s.     | n.s.             |
| <b>hsa-miR-365a-3p</b> | 9.65E-03  | 4.48E-02 | -1.70            | n.s.       | n.s.     | n.s.             |
| <b>hsa-let-7a-5p</b>   | 6.86E-06  | 9.40E-04 | -1.70            | n.s.       | n.s.     | n.s.             |
| <b>hsa-miR-99a-5p</b>  | 9.30E-03  | 4.39E-02 | -1.66            | 1.50E-03   | 5.03E-02 | 1.59             |
| <b>hsa-let-7f-5p</b>   | 9.91E-04  | 1.10E-02 | -1.61            | n.s.       | n.s.     | n.s.             |
| <b>hsa-miR-193a-5p</b> | 4.69E-04  | 7.67E-03 | -1.57            | n.s.       | n.s.     | n.s.             |
| <b>hsa-miR-152</b>     | 1.48E-02  | 6.14E-02 | -1.55            | n.s.       | n.s.     | n.s.             |
| <b>hsa-miR-221-3p</b>  | 4.04E-02  | n.s.     | n.s.             | 6.18E-05   | 7.06E-03 | 2.50             |
| <b>hsa-miR-107</b>     | 2.27E-02  | 8.48E-02 | n.s.             | 2.61E-05   | 3.48E-03 | 2.37             |
| <b>hsa-miR-495</b>     | n.s.      | n.s.     | n.s.             | 1.51E-03   | 5.03E-02 | 2.03             |
| hsa-miR-24-3p          | n.s.      | n.s.     | n.s.             | 2.97E-04   | 1.83E-02 | 1.83             |
| <b>hsa-let-7i-5p</b>   | 1.36E-03  | 1.43E-02 | n.s.             | 2.40E-05   | 3.48E-03 | 1.67             |
| <b>hsa-miR-409-3p</b>  | n.s.      | n.s.     | n.s.             | 5.79E-03   | 9.53E-02 | 1.56             |
| hsa-miR-382-5p         | n.s.      | n.s.     | n.s.             | 2.59E-03   | 6.91E-02 | 1.53             |
| <b>hsa-miR-210</b>     | 3.16E-04  | 6.00E-03 | n.s.             | 3.16E-03   | 7.44E-02 | -3.38            |
| <b>hsa-miR-15a-5p</b>  | n.s.      | n.s.     | n.s.             | 5.01E-03   | 9.23E-02 | -2.69            |
| hsa-miR-629-5p         | n.s.      | n.s.     | n.s.             | 5.08E-03   | 9.23E-02 | -2.51            |
| <b>hsa-miR-15b-5p</b>  | n.s.      | n.s.     | n.s.             | 1.09E-05   | 3.04E-03 | -2.26            |
| hsa-miR-196a-5p        | 3.59E-02  | n.s.     | n.s.             | 2.48E-03   | 6.83E-02 | -1.72            |
| <b>hsa-miR-16-5p</b>   | n.s.      | n.s.     | n.s.             | 1.15E-05   | 3.04E-03 | -1.70            |
| <b>hsa-miR-25-3p</b>   | n.s.      | n.s.     | n.s.             | 9.48E-04   | 4.21E-02 | -1.59            |

A total of 38 (19 up and 19 down) miRNAs were identified as significantly differentially expressed in BS fibroblasts, and 19 (9 up and 10 down) miRNAs in BLM-depleted human fibroblasts using the following cut-off: absolute expression ratio  $\geq 1.5$  and false discovery rate (FDR)  $< 0.1$ .

Cancer/disease associated miRNAs annotated in MalaCards: The Human Malady Compendium (<http://www.malacards.org/>) are highlighted in bold italic font.

**Table S5: Experimentally validated targets of miRNAs significantly altered in BS or BLM-depleted cells.**

| miRBase ID      | change in miRNA expression |           | Validated Targets    |          |          |           |          |         |          |           |
|-----------------|----------------------------|-----------|----------------------|----------|----------|-----------|----------|---------|----------|-----------|
|                 | BS vs NM                   | BLM vs NS |                      |          |          |           |          |         |          |           |
| hsa-miR-143-3p  | ↓ down                     | ↓ down    | AKT1                 | BCL2     | COL1A1   | DNMT3A    | FHIT     | FNDC3B  | FSCN1    | HK2       |
| hsa-miR-145-5p  | ↓ down                     | ↓ down    | HRAS                 | KRAS     | MACC1    | MAPK7     | MDM2     | MMP13   | MYO6     | SERPINE1  |
|                 |                            |           | ADAM17               | BNIP3    | CDHF2    | CDK4      | CDKN1A   | CLINT1  | CPEB4    |           |
|                 |                            |           | CTGF                 | DDX17    | EIF4E    | ERG       | F11R     | FLI1    | FSCN1    | FZD7      |
|                 |                            |           | HDAC2                | HOXA9    | IFNB1    | IGF1R     | ILK      | IRS1    | IRS2     | ITGB8     |
|                 |                            |           | KLF4                 | KRT7     | MDM2     | MUC1      | MYC      | MYO5A   | MYO6     | MYRF      |
|                 |                            |           | NANOG                | NEDD9    | NRAS     | PAK4      | POU5F1   | PPM1D   | PPP3CA   | ROBO2     |
| RTKN            | SERPINE1                   | SOC57     | SOX2                 | STAT1    | SWAP70   | TIRAP     | TMOD3    |         |          |           |
| VEGFA           | YES1                       |           |                      |          |          |           |          |         |          |           |
| hsa-miR-199a-5p | ↑ up                       | ↓ down    | CAV1                 | DDR1     | EDN1     | ERBB2     | EZH2     | GPR78   | IKBKB    | LIF       |
|                 |                            |           | MAP3K11              | SIRT1    | SMAD4    | SMARCA2   | SULT1E1  | UNG     |          |           |
| hsa-let-7d-5p   | ↓ down                     | ↑ up      | APP                  | DICER1   | HMG2A    | IL13      | MPL      | PDGFA   | SLC11A2  |           |
| hsa-miR-99a-5p  | ↓ down                     | ↑ up      | FGFR3                | IGR1R    | MTOR     | RAVER2    | SERPINE1 |         |          |           |
| hsa-miR-181a-5p | ↑ up                       | n.s.      | ATM                  | BCL2     | BCL2L11  | CDKN1B    | CDX2     | DDIT4   | DUSP5    | DUSP6     |
|                 |                            |           | FOS                  | GATA6    | GPR78    | HIPK2     | HRAS     | KAT2B   | KLF6     | MCL1      |
|                 |                            |           | MTMR3                | NLK      | NOTCH1   | PLAG1     | PRAP1    | PROX1   | PTPN11   | PTPN22    |
|                 |                            |           | RALA                 | SIRT1    | XIAP     | ZNF763    |          |         |          |           |
| hsa-miR-595     | ↑ up                       | n.s.      | PARD6A               |          |          |           |          |         |          |           |
| hsa-miR-30a-5p  | ↑ up                       | n.s.      | ABL1                 | AVEN     | BECN1    | DTL       | FOXD1    | NEUROD1 | NOTCH1   | PIK3CD    |
|                 |                            |           | PRDM1                | RUNX2    | SEPT7    | SMAD1     | TNRC6A   | TUBB4B  |          |           |
| hsa-miR-30d-5p  | ↑ up                       | n.s.      | CASP3                | EZH2     | GNAI2    | GPR78     | RUNX2    | SMAD1   | TP53     |           |
| hsa-miR-155-5p  | ↑ up                       | n.s.      | ACTR2                | AGO4     | AGTR1    | ANAPC16   | APAF1    | APC     | ARFIP1   | ARID2     |
|                 |                            |           | ARL15                | ARL6IP5  | ARMC2    | ARPC3     | BACH1    | BCL6    | C16orf62 | C17orf80  |
|                 |                            |           | C3orf18              | CAB39    | CARD11   | CARHSP1   | CBR4     | CCDC41  | CCDC82   | CD68      |
|                 |                            |           | CDC40                | CEBPB    | CEP41    | CHD9      | CIAPIN1  | CLUAP1  | CSNK1A1  | CYP2U1    |
|                 |                            |           | CYR61                | DCUN1D2  | DET1     | DHX40     | E2F2     | EDN1    | ETS1     | EXOSC2    |
|                 |                            |           | FAM135A              | FAM177A1 | FAM199X  | FAM91A1   | FGF7     | FLI1    | FOXO3    | GABARAPL1 |
|                 |                            |           | GATM                 | GCFC2    | GCSAM    | GOLT1B    | GPM6B    | HAL     | HBP1     | HERC4     |
|                 |                            |           | HIVEP2               | ICAM1    | IFNGR1   | IGJ       | IKBKE    | IL13RA1 | IL17RB   | IL8       |
|                 |                            |           | INPP5D               | INPP5F   | INTS6    | JARID2    | JUN      | KBTD2   | KDM3A    | KIAA0430  |
|                 |                            |           | KLHL5                | KRAS     | KRCC1    | LCORL     | LDOC1    | LIN7C   | LNX2     | LRIF1     |
|                 |                            |           | LRRC59               | MAP3K10  | MAP3K14  | MASTL     | MATR3    | MBNL3   | MCM8     | MECP2     |
|                 |                            |           | MEF2A                | MEI51    | MITF     | MLH1      | MORC3    | MPP5    | MRPL18   | MRPS27    |
|                 |                            |           | MSH2                 | MSH6     | MSI2     | MYB       | MYBL1    | MYD88   | MYO10    | MYO1D     |
|                 |                            |           | NARS                 | NFATC2IP | NOS3     | NOVA1     | OLR1     | PAK2    | PALD1    | PBRM1     |
|                 |                            |           | PCDH9                | PDLIM5   | PHC2     | PHF14     | PHF17    | PICALM  | PKIA     | PKN2      |
|                 |                            |           | PLS1                 | POLE3    | PRKAR1A  | RAB11FIP2 | RAC1     | RAPGEF2 | RBAK     | RHEB      |
|                 |                            |           | RHOA                 | RUNX2    | SAP30L   | SDCBP     | SECISBP2 | SELE    | SKI      | SLC33A1   |
|                 |                            |           | SLC35F2              | SMAD1    | SMAD2    | SMAD3     | SMAD4    | SMAD5   | SMARCA4  | SOCS1     |
|                 |                            |           | SPI1                 | SSX2IP   | TAB2     | TAF5L     | TBC1D14  | TBC1D8B | TBCA     | TCF12     |
|                 |                            |           | TLE4                 | TM6SF1   | TOMM20   | TP53INP1  | TRAK1    | TRIP13  | TSHZ3    | TSPAN14   |
| TTF1            | UBQLN1                     | UBTD2     | UPF2                 | UQCRCF51 | VPS18    | WBP1L     | WEE1     |         |          |           |
| WHSC1L1         | WWC1                       | YWHAZ     | ZIC3                 | ZNF248   | ZNF254   | ZNF28     | ZNF493   |         |          |           |
| ZNF561          | ZNF611                     | ZNF652    | ZNF83                |          |          |           |          |         |          |           |
| hsa-miR-29b-3p  | ↑ up                       | n.s.      | ADAM12               | BACE1    | BCL2     | BMP1      | CDC42    | CDK6    | COL1A1   | COL3A1    |
|                 |                            |           | COL4A1               | COL5A3   | CTNNBIP1 | DNAJB11   | DNMT1    | DNMT3A  | DNMT3B   | DUSP2     |
|                 |                            |           | ESR1                 | FGA      | FGB      | FGG       | FOS      | GRN     | HDAC4    | IFNG      |
|                 |                            |           | IMPDH1               | MCL1     | MMP15    | MMP2      | MMP24    | MYCN    | NASP     | NCOA3     |
|                 |                            |           | NID1                 | NKIRAS2  | PPP1R13B | PTEN      | RAX      | S100B   | SFPQ     | SP1       |
| TBX21           | TCL1A                      | TET1      | VEGFA                |          |          |           |          |         |          |           |
| hsa-miR-412     | ↑ up                       | n.s.      | ACVR1C               |          |          |           |          |         |          |           |
| hsa-miR-130a-3p | ↑ up                       | n.s.      | APP                  | ATG2B    | ATXN1    | CSF1      | DICER1   | ESR1    | HOXA10   | HOXA5     |
|                 |                            |           | IFITM1               | KLF4     | MAFB     | MEOX2     | PPARG    | RUNX3   | SMAD4    | TAC1      |
| hsa-miR-320a    | ↑ up                       | n.s.      | AQP1                 | AQP4     | HSPB6    | MAPK1     | MCL1     | NPR1    | TAC1     | TFRC      |
| hsa-miR-484     | ↑ up                       | n.s.      | FIS1                 |          |          |           |          |         |          |           |
| hsa-miR-29c-3p  | ↑ up                       | n.s.      | BACE1                | BCL2     | CDC42    | CDK6      | COL15A1  | COL1A1  | COL1A2   | COL21A1   |
|                 |                            |           | COL3A1               | COL4A1   | COL4A2   | COL7A1    | DNMT3A   | DNMT3B  | FBN1     | FGA       |
|                 |                            |           | FGB                  | FGG      | GAPDH    | IGFBP1    | LAMC1    | MCL1    | MMP15    | MMP24     |
| MYCN            | PPP1R13B                   | SPARC     | SRSF10               | TDG      | TFAP2C   | WNT4      |          |         |          |           |
| hsa-miR-634     | ↑ up                       | n.s.      | not available (n.a.) |          |          |           |          |         |          |           |
| hsa-miR-26b-5p  | ↑ up                       | n.s.      | ABCA1                | ARL4C    | CCNE1    | CDK6      | EPHA2    | PTGS2   |          |           |
| hsa-miR-34a-5p  | ↑ up                       | n.s.      | ACSL1                | ACSL4    | AXIN2    | AXL       | BCL2     | BMP7    | CCL22    | CCND1     |
|                 |                            |           | CCND3                | CCNE2    | CD44     | CDC25A    | CDK4     | CDK6    | CDKN2A   | CDKN2C    |
|                 |                            |           | CEBPB                | DLL1     | E2F1     | E2F3      | EPHA5    | FOSL1   | FOXP1    | GRM7      |
|                 |                            |           | HDAC1                | HNF4A    | IFNB1    | IMPA1     | IMPDH2   | JAG1    | KLB      | LDHA      |
|                 |                            |           | LEF1                 | MAGEA12  | MAGEA2   | MAGEA3    | MAGEA6   | MAP2K1  | MAP3K9   | MET       |
|                 |                            |           | MTA2                 | MYB      | MYC      | MYCN      | NANOG    | NOTCH1  | NOTCH2   | PDGFRA    |
|                 |                            |           | PEA15                | PPP1R10  | SIRT1    | SOX2      | SPI1     | STX1A   | SYT1     | TP53      |
|                 |                            |           | ULBP2                | VAMP2    | VEGFA    | WNT1      | YY1      | ZAP70   |          |           |
| hsa-miR-328     | ↑ up                       | n.s.      | ABCG2                | BACE1    | CD44     | H2AFX     | PTPRJ    |         |          |           |
| hsa-miR-29a-3p  | ↑ up                       | n.s.      | ABL1                 | ADAMTS9  | BACE1    | BCL2      | BCL7A    | CD276   | CDC42    | CDK6      |
|                 |                            |           | COL4A1               | COL4A2   | CPEB3    | CPEB4     | DICER1   | DKK1    | DNMT3A   | DNMT3B    |
|                 |                            |           | FGA                  | FGB      | FGG      | GLUL      | HBP1     | IMPDH1  | ITGA11   | ITIH5     |
|                 |                            |           | KREMEN2              | LPL      | MCL1     | MYCN      | NASP     | NAV3    | PIK3R1   | PPM1D     |
|                 |                            |           | PPP1R13B             | PTEN     | PXDN     | RAN       | S100B    | SFRP2   | TNFAIP3  |           |

|                 |        |        |                                                       |                                                   |                                                     |                                                      |                                                  |                                                     |                                                    |                                            |
|-----------------|--------|--------|-------------------------------------------------------|---------------------------------------------------|-----------------------------------------------------|------------------------------------------------------|--------------------------------------------------|-----------------------------------------------------|----------------------------------------------------|--------------------------------------------|
| hsa-miR-130b-3p | ↑ up   | n.s.   | CSF1                                                  | DICER1                                            | PPARG                                               | RUNX3                                                | TP53INP1                                         | UVRAG                                               | ZEB1                                               |                                            |
| hsa-miR-103a-3p | ↑ up   | n.s.   | CAV1<br>ID2                                           | CCNE1<br>KLF4                                     | CDK2<br>PTEN                                        | CREB1<br>TIMP3                                       | CYP2C8                                           | DAPK1                                               | DICER1                                             | GPD1                                       |
| hsa-miR-499a-5p | ↓ down | n.s.   | FOXO4                                                 | PDCD4                                             | SOX6                                                |                                                      |                                                  |                                                     |                                                    |                                            |
| hsa-miR-92b-3p  | ↓ down | n.s.   | CDKN1C                                                | NLK                                               | PRMT5                                               | SLC15A1                                              |                                                  |                                                     |                                                    |                                            |
| hsa-let-7c-5p   | ↓ down | n.s.   | BCL2L1<br>NRAS                                        | COPS6<br>TGFBR1                                   | COPS8<br>TRIM71                                     | DICER1                                               | GPS1                                             | HMGA2                                               | MPL                                                | MYC                                        |
| hsa-let-7b-5p   | ↓ down | n.s.   | ACTG1<br>DICER1<br>RPIA                               | CCNA1<br>HMGA2                                    | CCNA2<br>IFNB1                                      | CCND1<br>LIN28A                                      | CCND2<br>LIN28B                                  | CDC34<br>MTPN                                       | CDK6<br>NR2E1                                      | CYP2J2<br>PRDM1                            |
| hsa-miR-632     | ↓ down | n.s.   | PRDX6                                                 |                                                   |                                                     |                                                      |                                                  |                                                     |                                                    |                                            |
| hsa-let-7e-5p   | ↓ down | n.s.   | EIF3J                                                 | HMGA2                                             | MPL                                                 | MYCN                                                 | SMC1A                                            | WNT1                                                |                                                    |                                            |
| hsa-miR-129-5p  | ↓ down | n.s.   | FMR1                                                  | NOTCH1                                            | UBE2F                                               |                                                      |                                                  |                                                     |                                                    |                                            |
| hsa-miR-636     | ↓ down | n.s.   | n.a.                                                  |                                                   |                                                     |                                                      |                                                  |                                                     |                                                    |                                            |
| hsa-let-7g-5p   | ↓ down | n.s.   | BCL2L1<br>MYC                                         | BMI1                                              | CDKN2A                                              | COL1A2                                               | HMGA2                                            | IGF2BP1                                             | IL13                                               | KRAS                                       |
| hsa-miR-638     | ↓ down | n.s.   | OSCP1                                                 |                                                   |                                                     |                                                      |                                                  |                                                     |                                                    |                                            |
| hsa-miR-365a-3p | ↓ down | n.s.   | BCL2                                                  | CCND1                                             | IL6                                                 |                                                      |                                                  |                                                     |                                                    |                                            |
| hsa-let-7a-5p   | ↓ down | n.s.   | AGO4<br>E2F1<br>IGF2<br>NKIRAS2<br>VDR                | APP<br>E2F2<br>IL6<br>NR1I2                       | CASP3<br>EGFR<br>ITGB3<br>NRAS                      | CASP8<br>FOXA1<br>KRAS<br>PRDM1                      | CASP9<br>HAS2<br>LIN28A<br>RAVER2                | CCND2<br>HMGA1<br>MPL<br>TMED7                      | CDKN1A<br>HMGA2<br>MYC<br>TRIM71                   | DICER1<br>HRAS<br>NF2<br>UHRF2             |
| hsa-let-7f-5p   | ↓ down | n.s.   | COPS6<br>PRDM1                                        | COPS8<br>SLC5A5                                   | CYP19A1                                             | GPS1                                                 | IL13                                             | KLK6                                                | KLK10                                              | MPL                                        |
| hsa-miR-193a-5p | ↓ down | n.s.   | TP73                                                  |                                                   |                                                     |                                                      |                                                  |                                                     |                                                    |                                            |
| hsa-miR-152     | ↓ down | n.s.   | DMNT1                                                 | HLA-G                                             | IGF1R                                               | IRS1                                                 | TGFA                                             |                                                     |                                                    |                                            |
| hsa-miR-221-3p  | n.s.   | ↑ up   | ARIH2<br>CERS2<br>FMR1<br>NAIP<br>TNFSF10             | BBC3<br>CORO1A<br>FOS<br>PTEN<br>TP53             | BMF<br>CREBZF<br>FOXO3<br>SELE<br>USP18             | BNIP3<br>DDIT4<br>HMGXB4<br>TBK1<br>ZEB2             | BNIP3L<br>DICER1<br>ICAM1<br>TCEAL1              | BRAP<br>DKK2<br>KIT<br>TICAM1                       | CDKN1B<br>DVL2<br>MEOX2<br>TIMP3                   | CDKN1C<br>ESR1<br>MYBL1<br>TMED7           |
| hsa-miR-107     | n.s.   | ↑ up   | ARNT<br>DAPK1<br>NOTCH2                               | BACE1<br>DICER1<br>PLAG1                          | CCNE1<br>FBXW7<br>PTEN                              | CDCA4<br>GRN<br>RAB1B                                | CDK6<br>HIF1A<br>VEGFA                           | CHRM1<br>KLF4                                       | CRKL<br>MYB                                        | CYP2C8<br>NFIA                             |
| hsa-miR-495     | n.s.   | ↑ up   | MEIS1                                                 | PBX3                                              |                                                     |                                                      |                                                  |                                                     |                                                    |                                            |
| hsa-miR-24-3p   | n.s.   | ↑ up   | ACVR1B<br>CDKN1B<br>DND1<br>MCM10<br>PTPN9<br>ZNF217  | ARHGAP19<br>CDKN2A<br>E2F2<br>MCM4<br>PTPRF       | AURKB<br>CHEK1<br>FAF1<br>MLEC<br>SH3PXD2A          | BCL2L1<br>CNDP2<br>FEN1<br>MYC<br>ST7L               | BRCA1<br>CORO1A<br>FURIN<br>PAK4<br>STX16        | CCNA2<br>DEDD<br>H2AFX<br>PAK4<br>TGFB1             | CDK1<br>DHFR<br>HNF4A<br>PCNA<br>TMED7             | CDK4<br>DHFRP1<br>MAPK14<br>POLD1<br>TRIB3 |
| hsa-let-7i-5p   | n.s.   | ↑ up   | COPS6                                                 | COPS8                                             | GPS1                                                | IL13                                                 | SOCS1                                            | TLR4                                                |                                                    |                                            |
| hsa-miR-409-3p  | n.s.   | ↑ up   | ANG                                                   | FGA                                               | FGB                                                 | FGG                                                  | IFNG                                             | PHF10                                               |                                                    |                                            |
| hsa-miR-382-5p  | n.s.   | ↑ up   | n.a.                                                  |                                                   |                                                     |                                                      |                                                  |                                                     |                                                    |                                            |
| hsa-miR-210     | n.s.   | ↓ down | ABCB9<br>CDK10<br>ELK3<br>KIAA1161<br>NPTX1<br>SMCHD1 | ACVR1B<br>CHD9<br>FGFR1<br>MDGA1<br>P4HB<br>TNPO1 | AIFM3<br>CLASP2<br>GPD1L<br>MIB1<br>PIM1<br>TP53I11 | APC<br>CPEB2<br>HECTD1<br>MID1IP1<br>PTAR1<br>UBQLN1 | ATP11C<br>DDAH1<br>HOXA1<br>MNT<br>PTPN1<br>VMP1 | BDNF<br>DENND6A<br>HOXA3<br>MRE11A<br>RAD52<br>XIST | CASP8AP2<br>E2F3<br>HOXA9<br>NCAM1<br>SEH1L<br>XPA | CBX1<br>EFNA3<br>ISCU<br>NIPBL<br>SERTAD2  |
| hsa-miR-15a-5p  | n.s.   | ↓ down | AKT3<br>CCND2<br>RECK                                 | APP<br>CCNE1<br>TMEM184B                          | BACE1<br>CDC25A<br>TP53                             | BCL2<br>CHUK<br>TSPYL2                               | BMI1<br>DMTF1<br>UCP2                            | BRCA1<br>IFNG<br>VEGFA                              | CADM1<br>MYB<br>WNT3A                              | CCND1<br>PURA                              |
| hsa-miR-629-5p  | n.s.   | ↓ down | HNF4A                                                 |                                                   |                                                     |                                                      |                                                  |                                                     |                                                    |                                            |
| hsa-miR-15b-5p  | n.s.   | ↓ down | BCL2                                                  | CCND1                                             | CCNE1                                               | EIF4A1                                               | IFNG                                             | PURA                                                | RECK                                               | VEGFA                                      |
| hsa-miR-196a-5p | n.s.   | ↓ down | ANXA1<br>HOXC8                                        | BACH1<br>HOXD8                                    | CDKN1B<br>KRT5                                      | HMOX1<br>S100A9                                      | HOXA5<br>SPRR2C                                  | HOXA7                                               | HOXB7                                              | HOXB8                                      |
| hsa-miR-16-5p   | n.s.   | ↓ down | ACVR2A<br>CCND1<br>MYB<br>UNG                         | AKT3<br>CCND3<br>NCOR2<br>VEGFA                   | ARL2<br>CCNE1<br>PIM1<br>WNT3A                      | BCL2<br>CCNT2<br>PPM1D<br>ZYG                        | BMI1<br>CDK6<br>PTGS2                            | BRCA1<br>CHUK<br>PURA                               | CADM1<br>HMGA1<br>TP53                             | CAPRIN1<br>IFNG<br>TPPP3                   |
| hsa-miR-25-3p   | n.s.   | ↓ down | BCL2L1<br>PRMT5                                       | CCL26<br>SMAD7                                    | CDH1<br>TP53                                        | CDKN1C                                               | EZH2                                             | KAT2B                                               | KLF4                                               | MDM2                                       |

Validated miRNA target search was performed on miRNAs significantly changed in BS or BLM-depleted human fibroblasts (Table S5) using miRTarBase (v4.4, <http://mirtarbase.mbc.nctu.edu.tw/>)(16). Only target genes validated by strong experimental assays such as reporter assay or Western blot were listed.

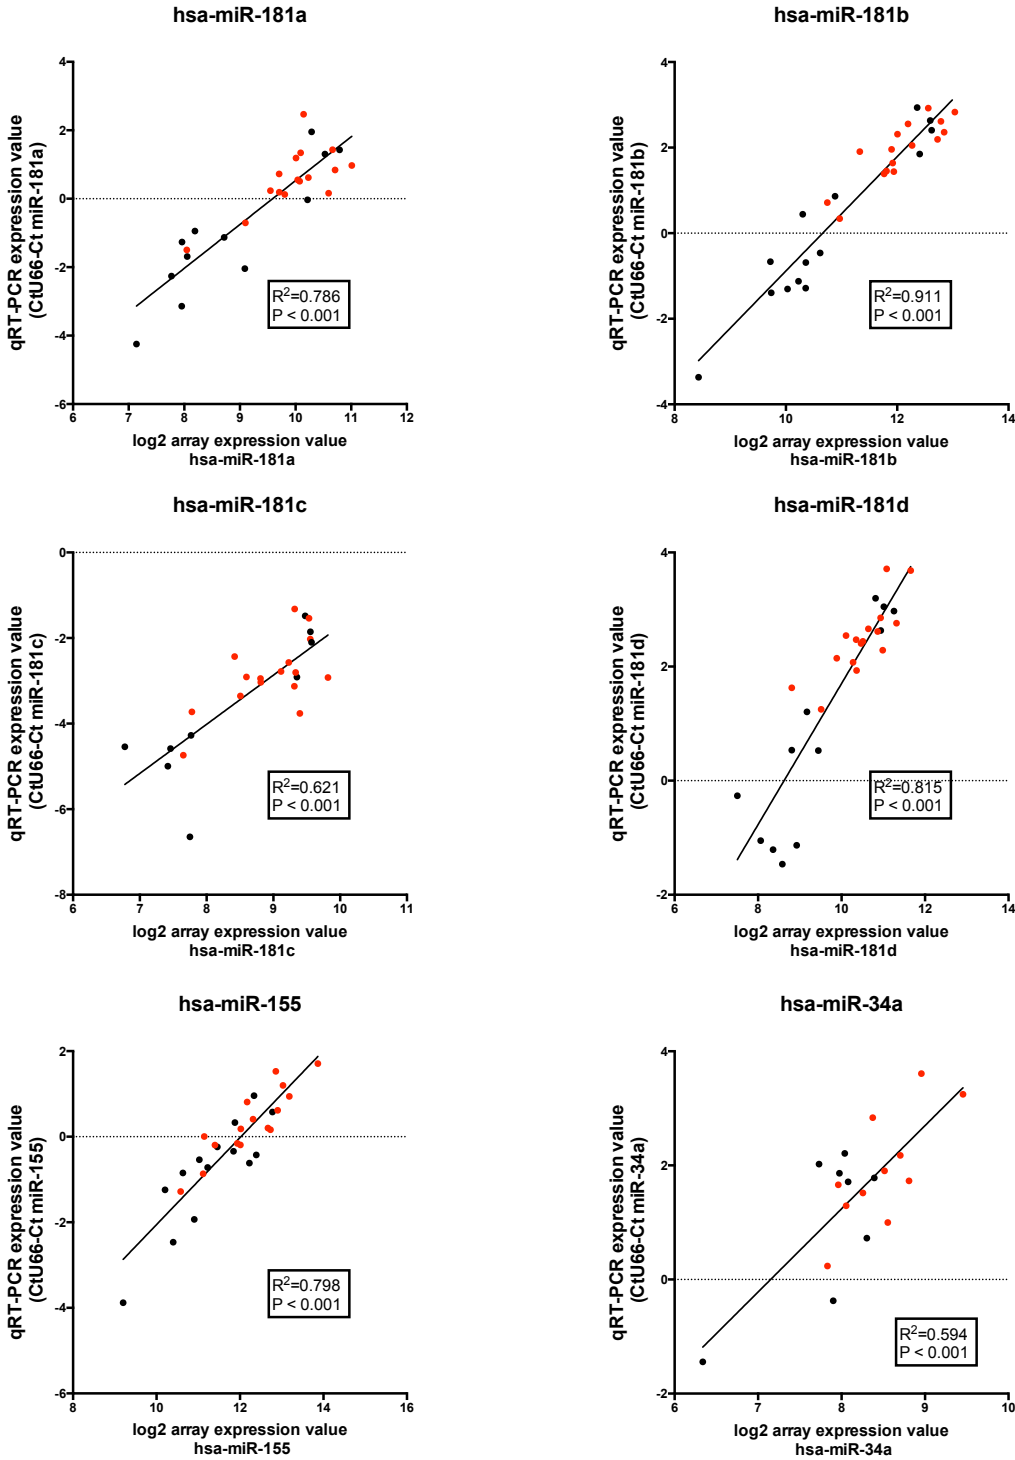

**Figure S5: qPCR verification of miRNA expression levels determined by microarray.** The log<sub>2</sub> expression values for indicated microRNAs are plotted against the qRT-PCR  $-\Delta Ct$  values ( $\Delta Ct = Ct_{miRNA} - Ct_{RNU66}$ ). Each dot represents a primary fibroblast cell line (red = BS, black = NM). Shown are the regression line as well as the P- and R<sup>2</sup> values (coefficient of determination) for the correlation. Methodological details are in the Supplementary materials.

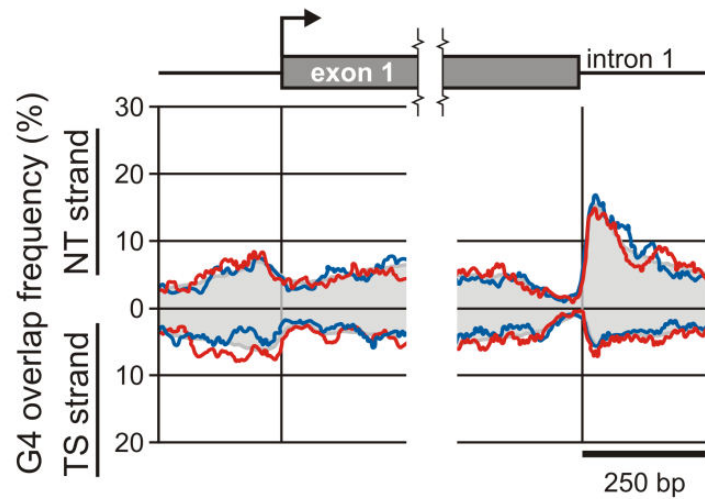

up-regulated genes (n = 547)

| G4 strand | -250 bp to TSS | TSS to +250 bp | first 250 bp of intron 1 |
|-----------|----------------|----------------|--------------------------|
| NT        | ns             | ns             | ns                       |
| TS        | ns             | ns             | ns                       |

down-regulated genes (n = 520)

| G4 strand | -250 bp to TSS | TSS to +250 bp | first 250 bp of intron 1 |
|-----------|----------------|----------------|--------------------------|
| NT        | ns             | ns             | +(0.017)                 |
| TS        | ns             | ns             | ns                       |

**Supplementary Figure S6: G4 motif frequencies and enrichment near transcription start sites and intron 1 boundaries of genes with altered expression in BLMdepleted cells.** (A) G4 motif frequencies as a function of location in genes up- and down-regulated in BLM-depleted cells. G4 motif counts are shown for non-transcribed strands (NT) and transcribed strands (TS) over the 250 bp  $\pm$  gene transcription start sites (TSSs) and exon 1/intron 1 5' boundaries for genes whose expression was up- or downregulated (red and blue curves, respectively) versus the comparable distributions for 1,000 randomly-selected gene sets of equal size drawn from the pool of all genes on expression arrays. Gray areas indicate average G4 motif frequencies among all genes surveyed on expression arrays. (B) False Discovery Rates (FDR) of observed G4 motif frequencies compared to 1,000 randomly selected gene sets. ns: non-significant (FDR >0.05)



**Table S6. Hypergeometric test of miRNA targeting vs. significantly altered mRNA expression**

| miRBase ID                                | BS-NM miR direction | BLM-NS miR direction | num validated targets | DEG targets DOWN in BS-NM | total DEG DOWN in BS-NM | fraction altered as predicted | p-value   | intersect genes                                                                  |
|-------------------------------------------|---------------------|----------------------|-----------------------|---------------------------|-------------------------|-------------------------------|-----------|----------------------------------------------------------------------------------|
| hsa-miR-199a-5p                           | up                  | down                 | 15                    | 0                         | 141                     |                               | 1         |                                                                                  |
| hsa-miR-181a-5p                           | up                  | n.s.                 | 28                    | 0                         | 141                     |                               | 1         |                                                                                  |
| hsa-miR-595                               | up                  | n.s.                 | 1                     | 0                         | 141                     |                               | 1         |                                                                                  |
| hsa-miR-30a-5p                            | up                  | n.s.                 | 14                    | 0                         | 141                     |                               | 1         |                                                                                  |
| hsa-miR-30d-5p                            | up                  | n.s.                 | 7                     | 0                         | 141                     |                               | 1         |                                                                                  |
| hsa-miR-155-5p                            | up                  | n.s.                 | 183                   | 0                         | 141                     |                               | 1         |                                                                                  |
| hsa-miR-29b-3p                            | up                  | n.s.                 | 44                    | 1                         | 141                     | 0.023                         | 4.985E-02 | MMP24                                                                            |
| hsa-miR-412                               | up                  | n.s.                 | 1                     | 0                         | 141                     |                               | 1         |                                                                                  |
| hsa-miR-130a-3p                           | up                  | n.s.                 | 23                    | 0                         | 141                     |                               | 1         |                                                                                  |
| hsa-miR-320a                              | up                  | n.s.                 | 8                     | 0                         | 141                     |                               | 1         |                                                                                  |
| hsa-miR-484                               | up                  | n.s.                 | 1                     | 1                         | 141                     | 1.000                         | 0         | FIS1                                                                             |
| hsa-miR-29c-3p                            | up                  | n.s.                 | 31                    | 1                         | 141                     | 0.032                         | 2.623E-02 | MMP24                                                                            |
| hsa-miR-26b-5p                            | up                  | n.s.                 | 6                     | 0                         | 141                     |                               | 1         |                                                                                  |
| hsa-miR-34a-5p                            | up                  | n.s.                 | 63                    | 0                         | 141                     |                               | 1         |                                                                                  |
| hsa-miR-328                               | up                  | n.s.                 | 5                     | 0                         | 141                     |                               | 1         |                                                                                  |
| hsa-miR-29a-3p                            | up                  | n.s.                 | 47                    | 1                         | 141                     | 0.021                         | 5.608E-02 | ITGA11                                                                           |
| hsa-miR-130b-3p                           | up                  | n.s.                 | 7                     | 0                         | 141                     |                               | 1         |                                                                                  |
| hsa-miR-103a-3p                           | up                  | n.s.                 | 12                    | 0                         | 141                     |                               | 1         |                                                                                  |
| <b>UP in BS-NM      UP in BS-NM</b>       |                     |                      |                       |                           |                         |                               |           |                                                                                  |
| hsa-miR-143-3p                            | down                | down                 | 15                    | 2                         | 1012                    | 0.133                         | 5.346E-02 | FNDC3B, MDM2                                                                     |
| hsa-let-7d-5p                             | down                | up                   | 7                     | 0                         | 1012                    |                               | 1         |                                                                                  |
| hsa-miR-99a-5p                            | down                | up                   | 5                     | 0                         | 1012                    |                               | 1         |                                                                                  |
| hsa-miR-499a-5p                           | down                | n.s.                 | 3                     | 0                         | 1012                    |                               | 1         |                                                                                  |
| hsa-miR-92b-3p                            | down                | n.s.                 | 4                     | 0                         | 1012                    |                               | 1         |                                                                                  |
| hsa-let-7c-5p                             | down                | n.s.                 | 11                    | 0                         | 1012                    |                               | 1         |                                                                                  |
| hsa-let-7b-5p                             | down                | n.s.                 | 24                    | 2                         | 1012                    | 0.083                         | 1.625E-01 | BIRC6, PDGFRA                                                                    |
| hsa-miR-632                               | down                | n.s.                 | 1                     | 0                         | 1012                    |                               | 1         |                                                                                  |
| hsa-let-7e-5p                             | down                | n.s.                 | 6                     | 1                         | 1012                    | 0.167                         | 4.372E-02 | EIF3J                                                                            |
| hsa-miR-129-5p                            | down                | n.s.                 | 7                     | 1                         | 1012                    | 0.143                         | 5.888E-02 | BMPR2                                                                            |
| hsa-let-7g-5p                             | down                | n.s.                 | 10                    | 0                         | 1012                    |                               | 1         |                                                                                  |
| hsa-miR-638                               | down                | n.s.                 | 1                     | 0                         | 1012                    |                               | 1         |                                                                                  |
| hsa-miR-365a-3p                           | down                | n.s.                 | 3                     | 0                         | 1012                    |                               | 1         |                                                                                  |
| hsa-let-7a-5p                             | down                | n.s.                 | 44                    | 4                         | 1012                    | 0.091                         | 1.122E-01 | EGFR, HAS2, SLC20A1, TMED7                                                       |
| hsa-let-7f-5p                             | down                | n.s.                 | 15                    | 0                         | 1012                    |                               | 1         |                                                                                  |
| hsa-miR-193a-5p                           | down                | n.s.                 | 1                     | 0                         | 1012                    |                               | 1         |                                                                                  |
| hsa-miR-152                               | down                | n.s.                 | 5                     | 1                         | 1012                    | 0.200                         | 3.031E-02 | IRS1                                                                             |
| hsa-miR-145-5p                            | down                | down                 | 50                    | 10                        | 1012                    | 0.200                         | 1.169E-04 | CLINT1, DDX17, FZD7, HDAC2, HOXA9, IRS1, MDM2, MYO5A,                            |
| <b>DOWN in BLM-NS      DOWN in BLM-NS</b> |                     |                      |                       |                           |                         |                               |           |                                                                                  |
| hsa-let-7d-5p                             | down                | up                   | 7                     | 0                         | 752                     |                               | 1         |                                                                                  |
| hsa-miR-99a-5p                            | down                | up                   | 5                     | 0                         | 752                     |                               | 1         |                                                                                  |
| hsa-miR-221-3p                            | n.s.                | up                   | 38                    | 1                         | 752                     | 0.026                         | 4.959E-01 | CDKN1B                                                                           |
| hsa-miR-107                               | n.s.                | up                   | 21                    | 0                         | 752                     |                               | 1         |                                                                                  |
| hsa-miR-495                               | n.s.                | up                   | 2                     | 0                         | 752                     |                               | 1         |                                                                                  |
| hsa-let-7i-5p                             | n.s.                | up                   | 6                     | 1                         | 752                     | 0.167                         | 2.514E-02 | TLR4                                                                             |
| hsa-miR-409-3p                            | n.s.                | up                   | 6                     | 0                         | 752                     |                               | 1         |                                                                                  |
| hsa-miR-24-3p                             | n.s.                | up                   | 54                    | 12                        | 752                     | 0.222                         | 3.747E-07 | ARHGAP19, AURKB, BRCA1, CDK1, CDKN1B, E2F1, FEN1, H2AFX, MCM10, MCM4, PCNA, RRM2 |
| <b>UP in BLM-NS      UP in BLM-NS</b>     |                     |                      |                       |                           |                         |                               |           |                                                                                  |
| hsa-miR-143-3p                            | down                | down                 | 15                    | 2                         | 580                     | 0.133                         | 1.259E-02 | FSCN1, MDM2                                                                      |
| hsa-miR-145-5p                            | down                | down                 | 50                    | 4                         | 580                     | 0.080                         | 2.542E-02 | FLI1, FSCN1, MDM2, MYC                                                           |
| hsa-miR-199a-5p                           | up                  | down                 | 15                    | 0                         | 580                     |                               | 1         |                                                                                  |
| hsa-miR-210                               | n.s.                | down                 | 47                    | 2                         | 580                     | 0.043                         | 2.079E-01 | BDNF, ISCU                                                                       |
| hsa-miR-15a-5p                            | n.s.                | down                 | 29                    | 2                         | 580                     | 0.069                         | 7.176E-02 | CADM1, CCND2                                                                     |
| hsa-miR-629-5p                            | n.s.                | down                 | 1                     | 0                         | 580                     |                               | 1         |                                                                                  |
| hsa-miR-15b-5p                            | n.s.                | down                 | 8                     | 0                         | 580                     |                               | 1         |                                                                                  |
| hsa-miR-196a-5p                           | n.s.                | down                 | 14                    | 2                         | 580                     | 0.143                         | 1.032E-02 | BACH1, HOXA7                                                                     |
| hsa-miR-16-5p                             | n.s.                | down                 | 34                    | 2                         | 580                     | 0.059                         | 1.042E-01 | CADM1, PTGS2                                                                     |
| hsa-miR-25-3p                             | n.s.                | down                 | 11                    | 1                         | 580                     | 0.091                         | 5.041E-02 | MDM2                                                                             |

**Table S6a: Selected target genes differentially expressed in BS and BLM depleted cells**

**BS cells**

|                                        | <b>Gene</b> | <b>Function</b>                                                                           | <b>mRNA expression</b> |
|----------------------------------------|-------------|-------------------------------------------------------------------------------------------|------------------------|
| <b>Apoptosis</b>                       | BIRC6       | anti-apoptotic                                                                            | up                     |
|                                        | FIS1        | pro-apoptotic                                                                             | down                   |
| <b>p53 pathway</b>                     | MDM2        | negative regulator of p53                                                                 | up                     |
| <b>Growth factor receptor/oncogene</b> | EGFR        | EGF receptor                                                                              | up                     |
|                                        | PDGFRA      | PDGF receptor                                                                             | up                     |
|                                        | FZD7        | Wnt signaling component                                                                   | up                     |
|                                        | MYC         | plays an important role in cell cycle progression, apoptosis and cellular transformation. | up                     |
|                                        | FLI1        | proto-oncogene                                                                            | up                     |
| <b>Insulin signaling</b>               | IRS1        | insulin receptor signaling                                                                | up                     |

**BLM depleted cells**

|                                                  | <b>Gene</b> | <b>Function</b>                                                                           | <b>mRNA expression</b> |
|--------------------------------------------------|-------------|-------------------------------------------------------------------------------------------|------------------------|
| <b>p53 pathway</b>                               | MDM2        | negative regulator of p53                                                                 | up                     |
| <b>Oncogene</b>                                  | MYC         | plays an important role in cell cycle progression, apoptosis and cellular transformation. | up                     |
|                                                  | FLI1        | proto-oncogene?                                                                           | up                     |
| <b>DNA replication &amp; DNA damage response</b> | BRCA1       | DNA damage response and repair                                                            | down                   |
|                                                  | FEN1        | DNA replication and repair                                                                | down                   |
|                                                  | H2AFX       | DNA damage response and repair                                                            | down                   |
|                                                  | MCM4        | DNA replication                                                                           | down                   |
|                                                  | MCM10       | DNA replication and repair                                                                | down                   |
|                                                  | PCNA        | DNA replication                                                                           | down                   |
|                                                  | RRM2        | DNA replication                                                                           | down                   |
| <b>Cell cycle control</b>                        | CDK1        | Regulation of cell cycle progression.                                                     | down                   |
|                                                  | CDKN1B      | Inhibition of cell cycle progression.                                                     | down                   |
|                                                  | E2F1        | Involved in cell cycle regulation or in DNA replication.                                  | down                   |

**Table 7A: Differentially Expressed Genes in BS patients vs NM that have at least one G4 motif in each region**

| Region       | -250 bp to TSS |           |          |          |          |          | TSS to +250 bp |          |           |          |          |          | First 250bp of Intron 1 |          |           |          |          |         |
|--------------|----------------|-----------|----------|----------|----------|----------|----------------|----------|-----------|----------|----------|----------|-------------------------|----------|-----------|----------|----------|---------|
| Regulation   | Up             |           |          | Down     |          |          | Up             |          |           | Down     |          |          | Up                      |          |           | Down     |          |         |
| G4 Strand    | Either         | NT        | T        | Either   | NT       | T        | Either         | NT       | T         | Either   | NT       | T        | Either                  | NT       | T         | Either   | NT       | T       |
| Gene Symbols | AAK1           | ACBD3     | ACSL3    | ACAN     | ADA      | ACAN     | AAK1           | AAK1     | ACTR10    | ACAN     | ADA      | ACAN     | AAK1                    | AAK1     | ACBD3     | ADA      | ADA      | ADARB1  |
|              | ACBD3          | ACTR10    | ADAM10   | ACTC1    | ADARB1   | ACTC1    | ACTR10         | ACTR3    | ACVR1     | ADA      | ADARB1   | ADAMTSL1 | ACBD3                   | ACSL3    | ACTR10    | ADARB1   | ADARB1   | AKR1B1  |
|              | ACSL3          | ACTR3     | ADAMTSS5 | ADA      | ADD2     | ADAMTSL1 | ACTR3          | ADAM10   | ADD3      | ADAMTSL1 | ALOX12   | AKR1B1   | ACSL3                   | ACTR3    | ACTR3     | ADD2     | ADD2     | ALOX12  |
|              | ACTR10         | ADAMTSS5  | ADNP     | ADAMTSL1 | ALDH1B1  | AIP      | ACVR1          | ADD3     | ADNP      | ADARB1   | ATP6V0B  | BAD      | ACTR10                  | ADD3     | ADAM10    | AKR1B1   | AKR1B1   | BAD     |
|              | ACTR3          | ADD3      | AFF4     | ADARB1   | ALDOC    | ALOX12   | ADAM10         | AGPAT3   | AGFG1     | AKR1B1   | BACE2    | C10orf10 | ACTR3                   | AFF4     | ADNP      | ALOX12   | ALOX12   | C1QTNF5 |
|              | ADAM10         | AGPAT3    | AGPAT3   | ADD2     | ALOX12   | BAD      | ADD3           | AHDC1    | AGPAT3    | ALOX12   | BAD      | CABLES1  | ADAM10                  | AGFG1    | AGPAT3    | ATP6V0B  | ATP6V0B  | CABLES1 |
|              | ADD3           | AHDC1     | ANKRD13A | AIP      | BAD      | C10orf10 | ADNP           | AHNAK2   | AHNAK2    | ATP6V0B  | C12orf57 | CRLF1    | ADD3                    | AGPAT3   | AHNAK2    | BACE2    | BACE2    | CALB2   |
|              | ADNP           | AHNAK2    | ANKRD36B | ALDH1B1  | C10orf10 | CABLES1  | AGFG1          | ANKRD13A | ANKRD13A  | BACE2    | C1QTNF5  | CYGB     | ADNP                    | AHDC1    | AHR       | BAD      | C12orf57 | CRLF1   |
|              | AFF4           | AHR       | ANXA7    | ALDOC    | CD24     | CALB2    | AGPAT3         | ANPEP    | ANXA7     | BAD      | C1B1     | CYP4A22  | AFF4                    | AHNAK2   | ANKRD13A  | C12orf57 | CABLES1  | ENO2    |
|              | AGFG1          | AK3       | AP1G1    | ALOX12   | COMP     | C1B1     | AHDC1          | ANXA7    | APH1B     | C10orf10 | CRLF1    | DMPK     | AGFG1                   | AK3      | APH1B     | C1QTNF5  | C1B1     | FDXACB1 |
|              | AGPAT3         | ANKRD36B  | APBB2    | BAD      | CRLF1    | CYGB     | AHNAK2         | APPBP2   | ARCN1     | C12orf57 | EIF6     | ENO2     | AGPAT3                  | ANKRD13A | APPL2     | CABLES1  | CNN1     | FUOM    |
|              | AHDC1          | ANKRD50   | APH1B    | C10orf10 | DMPK     | DMPK     | ANKRD13A       | ARHGAP21 | ARHGEF12  | C1QTNF5  | FAM101A  | FNDC4    | AHDC1                   | ANKRD36B | ARL6IP1   | CALB2    | CRLF1    | GPC4    |
|              | AHNAK2         | ANLN      | API5     | CABLES1  | FNDC4    | ENO2     | ANPEP          | ARHGAP29 | ARL6IP1   | CABLES1  | FIS1     | FUOM     | AHNAK2                  | ANKRD50  | ARL6IP6   | C1B1     | CYGB     | KCNK6   |
|              | AHR            | ANPEP     | ARCN1    | CALB2    | GSTM5    | FMOD     | ANXA7          | ARL5B    | ASAP1     | C1B1     | FSTL3    | IDH2     | AHR                     | ANPEP    | ASAP2     | CNN1     | CYP4A22  | LRRC3   |
|              | AK3            | ARL5B     | ARHGAP18 | CD24     | GUK1     | FNDC4    | APH1B          | ARL6IP6  | ASAP2     | CRLF1    | FUOM     | LMOD1    | AK3                     | ANXA7    | ATMIN     | CRLF1    | DHRS3    | MEI1    |
|              | ANKRD13A       | ARL6IP6   | ARHGAP29 | C1B1     | IFI30    | FSTL3    | APPBP2         | ARPP19   | ATG3      | CYGB     | FXYD1    | LRRC3    | ANKRD13A                | AP3B1    | ATP1B3    | CYGB     | DMPK     | MRSP11  |
|              | ANKRD36B       | ARPP19    | ARHGEF12 | COMP     | LBH      | FUOM     | ARCN1          | ASAP1    | ATP6AP2   | CYP4A22  | GSTM5    | NPAS1    | ANKRD36B                | APH1B    | ATP8B1    | CYP4A22  | EIF6     | MSRB2   |
|              | ANKRD50        | ARRDC3    | ARL6IP6  | CRLF1    | MANBAL   | GADD45B  | ARHGAP21       | ASAP2    | ATP6V1A   | DMPK     | HAPLN3   | RASD2    | ANKRD50                 | APPL2    | AZIN1     | DHRS3    | FAM101A  | NPAS1   |
|              | ANPEP          | ASAP2     | ASAP2    | CYGB     | MCAM     | GJD2     | ARHGAP29       | ASPH     | ATP8B1    | EIF6     | ID3      | RHOD     | ANPEP                   | ARHGAP21 | BCAP29    | DMPK     | FIS1     | NPR3    |
|              | ANXA7          | ASH1L     | ATF2     | DMPK     | MMP24    | GPC4     | ARHGEF12       | ATMIN    | BAG2      | ENO2     | IFI30    | SCARF2   | ANXA7                   | ARHGAP29 | BMPR2     | EIF6     | FMOD     | NTMT1   |
|              | AP3B1          | ASPH      | ATG3     | ENO2     | MSRB1    | IDH2     | ARL5B          | ATP2C1   | BCAP29    | FAM101A  | IRF6     | SDHC     | AP3B1                   | ARL6IP5  | BTBD1     | ENO2     | FNDC4    | NXPH3   |
|              | APH1B          | ATF2      | ATP6V1A  | FMOD     | MSRB2    | ITGA11   | ARL6IP1        | ATP5L    | BICC1     | FIS1     | KCNK6    | SELM     | APH1B                   | ASAP1    | BTF3L4    | FAM101A  | FSTL3    | PGK1    |
|              | APPL2          | ATMIN     | AZIN1    | FNDC4    | MYL6     | KRT34    | ARL6IP6        | ATP6AP2  | BIRC6     | FNDC4    | LRRC3    | SEPT5    | APPL2                   | ASH1L    | C12orf23  | FDXACB1  | FUOM     | RASD2   |
|              | ARHGAP21       | ATP1B3    | BICC1    | FSTL3    | NDRG2    | LIMK2    | ARPP19         | ATP8B1   | BMPR2     | FSTL3    | MANBAL   | SLC38A5  | ARHGAP21                | ASPH     | CAB39     | FIS1     | FXYD1    | SDHC    |
|              | ARHGAP29       | ATP2A2    | BIRC2    | FUOM     | NOTCH3   | LRRC3    | ASAP1          | BAG2     | BZW1      | FUOM     | MMP24    | SNTA1    | ARHGAP29                | ATMIN    | CACHD1    | FMOD     | GADD45B  | SEL1L3  |
|              | ARL6IP1        | ATP2C1    | BIRC6    | GADD45B  | NPAS1    | MCAM     | ASAP2          | BCAP29   | C12orf75  | FXYD1    | MSRB1    | ST3GAL4  | ARL6IP1                 | ATP1B3   | CALCOCO2  | FNDC4    | GSTM5    | SELM    |
|              | ARL6IP5        | ATP8B1    | BMP2K    | GJD2     | NPR3     | MMP24    | ASPH           | BET1     | C3orf58   | GSTM5    | MSRB2    | TAGLN    | ARL6IP5                 | ATP2A2   | CAMK2D    | FSTL3    | GUK1     | SEPT5   |
|              | ARL6IP6        | AZIN1     | BRCC3    | GPC4     | NXPH3    | MYL6     | ATG3           | BIRC2    | CACHD1    | HAPLN3   | MYL6     | TMEM141  | ARL6IP6                 | ATP5L    | CAMSAP2   | FUOM     | HAPLN3   | SLC4A3  |
|              | ASAP1          | BAG2      | BZW1     | GSTM5    | POLR2G   | NDRG2    | ATMIN          | BMP2K    | CACNA2D1  | ID3      | NDRG2    | TMEM9    | ASAP1                   | ATP6AP2  | CAPRIN1   | FXYD1    | HSPB7    | TMEM9   |
|              | ASAP2          | BICC1     | C12orf75 | GUK1     | PTPRN    | NPAS1    | ATP2C1         | BTBD1    | CALCOCO2  | IDH2     | NDUFA13  | UXT      | ASAP2                   | AZIN1    | CAPZ2     | GADD45B  | IFI30    | YBX1    |
|              | ASH1L          | BMPR2     | C3orf17  | IDH2     | RPS4X    | NPR3     | ATP5L          | C12orf23 | CAMSAP2   | IFI30    | NOTCH3   | YBX1     | ASH1L                   | B2M      | CAV2      | GPC4     | IRF6     |         |
|              | ASPH           | BOD1      | C3orf58  | IFI30    | SCARF2   | PODNL1   | ATP6AP2        | C12orf75 | CAST      | IRF6     | NXPH3    |          | ASPH                    | BCAP29   | CCDC6     | GSTM5    | ISLR     |         |
|              | ATMIN          | C12orf23  | CACHD1   | ITGA11   | SEL1L3   | POLE4    | ATP6V1A        | C3orf17  | CAV1      | KCNK6    | ORMDL2   |          | ATMIN                   | BET1     | CCT6A     | GUK1     | LMOD1    |         |
|              | ATP1B3         | C12orf75  | CACNA2D1 | KRT34    | SELM     | PTPRN    | ATP8B1         | C5orf51  | CCDC6     | LMOD1    | PGK1     |          | ATP1B3                  | BIRC2    | CEP170    | HAPLN3   | LRRC3    |         |
|              | ATP2A2         | C5orf51   | CAMSAP2  | LBH      | SEPT5    | RASD2    | BAG2           | CASB     | CD44      | LRRC3    | PODNL1   |          | ATP2A2                  | BIRC6    | CHAMP1    | HSPB7    | MMP24    |         |
|              | ATP5L          | CA5B      | CANX     | LIMK2    | SLC4A3   | RHOD     | BCAP29         | CAB39    | CD9       | MANBAL   | POLR2G   |          | ATP5L                   | BLOC1S6  | CLIC4     | IFI30    | MSRB1    |         |
|              | ATP6AP2        | CALCOCO2  | CCDC25   | LRRC3    | SPRYD3   | SCARF2   | BET1           | CALCOCO2 | CDC42EP3  | MMP24    | RNASE3   |          | ATP6AP2                 | BMS1     | CLINT1    | IRF6     | MYL6     |         |
|              | ATP8B1         | CAMSAP2   | CCDC6    | MANBAL   | ST3GAL4  | SDF2     | BICC1          | CAMK2D   | CDV3      | MSRB1    | RPS4X    |          | ATP8B1                  | BTBD1    | CLOCK     | ISLR     | NDRG2    |         |
|              | AZIN1          | CANX      | CCT6A    | MCAM     |          | SEPT5    | BIRC2          | CAMSAP2  | CFL2      | MSRB2    | SCARF2   |          | AZIN1                   | BZW1     | CMTM6     | KCNK6    | NDUFA13  |         |
|              | B2M            | CAPZ2     | CD46     | MMP24    |          | SGCA     | BIRC6          | CANX     | CLIC4     | MYL6     | SGCA     |          | B2M                     | C12orf23 | CNEP1R1   | LMOD1    | NOTCH3   |         |
|              | BCAP29         | CAST      | CDC42EP3 | MSRB1    |          | SLC38A5  | BMP2K          | CAST     | CLMP      | NDRG2    | SLC4A3   |          | BCAP29                  | C12orf75 | CNOT4     | LRRC3    | NPR3     |         |
|              | BET1           | CAV2      | CDK17    | MSRB2    |          | SLC4A3   | BMPR2          | CAV1     | CLOCK     | NDUFA13  | SNTA1    |          | BET1                    | C3orf17  | COPB1     | MEI1     | NXPH3    |         |
|              | BIRC2          | CD47      | CDV3     | MYL6     |          | SNTA1    | BTBD1          | CAV2     | CMPK1     | NOTCH3   | SPRYD3   |          | BIRC2                   | C3orf58  | COPS2     | MMP24    | ORMDL2   |         |
|              | BIRC6          | CD9       | CFL2     | NDRG2    |          | ST3GAL4  | BZW1           | CD44     | CNEP1R1   | NPAS1    | ST3GAL4  |          | BIRC6                   | C5orf15  | COX16     | MRSP11   | PODNL1   |         |
|              | BLOC1S6        | CDK17     | CHAMP1   | NOTCH3   |          | TAGLN    | C12orf23       | CD47     | CPEB2     | NXPH3    | TMEM141  |          | BLOC1S6                 | C5orf51  | CREBBP    | MSRB1    | POLE4    |         |
|              | BMPR2          | CLMP      | CHIC2    | NPAS1    |          | TMEM141  | C12orf75       | CDK12    | CNEP3     | ORMDL2   | TMEM9    |          | BMPR2                   | C9orf47  | CSNK2A1   | MSRB2    | POLR2G   |         |
|              | BMS1           | CLOCK     | CLDN11   | NPR3     |          | UXT      | C3orf17        | CEP170   | CREBBP    | PGK1     | UQCRCQ   |          | BMS1                    | CA5B     | CTBP1-AS2 | MYL6     | PSMB5    |         |
|              | BTBD1          | CNEP1R1   | CLIC4    | NXPH3    |          | VAMP5    | C3orf58        | CFL2     | CTBP1-AS2 | PODNL1   | UXT      |          | BTBD1                   | CACNA2D1 | CUL3      | NDRG2    | PTPRN    |         |
|              | BTF3L4         | COLEC12   | CLMP     | PODNL1   |          |          | C5orf51        | CHAMP1   | CUL4B     | POLR2G   | VAMP5    |          | BTF3L4                  | CAMK2D   | DCUN1D1   | NDUFA13  | RG516    |         |
|              | BZW1           | CORO2B    | CLOCK    | POLE4    |          |          | CA5B           | CLOCK    | CYBRD1    | RASD2    |          |          | BZW1                    | CAPN2    | DCUN1D5   | NOTCH3   | RHOD     |         |
|              | C12orf23       | COX20     | CNOT11   | POLR2G   |          |          | CAB39          | CMTM6    | DCTN6     | RHOD     |          |          | C12orf23                | CAST     | DDX1      | NPAS1    | RNASE3   |         |
|              | C12orf75       | CREBBP    | CNOT4    | PTPRN    |          |          | CACHD1         | CNEP1R1  | DCUN1D1   | RNASE3   |          |          | C12orf75                | CAV1     | DDX17     | NPR3     | RPS4X    |         |
|              | C3orf17        | CST4      | CNOT7    | RASD2    |          |          | CACNA2D1       | CNOT1    | DDX3X     | RPS4X    |          |          | C3orf17                 | CCAR1    | DDX3X     | NTMT1    | SCARF2   |         |
|              | C3orf58        | CTBP1-AS2 | CPNE3    | RHOD     |          |          | CALCOCO2       | CNOT11   | DNAJC10   | SCARF2   |          |          | C3orf58                 | CCDC6    | DHX9      | NXPH3    | SDF2     |         |
|              | C5orf15        | CTHRC1    | CRK      | RPS4X    |          |          | CAMK2D         | CNOT4    | DNAJC3    | SDHC     |          |          | C5orf15                 | CCNG1    | DNAJC3    | ORMDL2   | SEL1L3   |         |
|              | C5orf51        | CUL1      | CUL3     | SCARF2   |          |          | CAMSAP2        | CNOT7    | PPP4      | SELM     |          |          | C5orf51                 | CCNT1    | DYNC1H1   | PGK1     | SGCA     |         |
|              | C9orf47        | DARS      | CUL4B    | SDF2     |          |          | CANX           | COLEC12  | DPYD      | SEPT5    |          |          | C9orf47                 | CCT6A    | DYNLT3    | PODNL1   | SLC4A3   |         |
|              | CA5B           | DCBLD1    | CYP1B1   | SEL1L3   |          |          | CAST           | COPB1    | DSTNP2    | SGCA     |          |          | CA5B                    | CD109    | EDEM1     | POLE4    | SNTA1    |         |

|           |          |          |         |
|-----------|----------|----------|---------|
| CAB39     | DCTN4    | DCTN6    | SELM    |
| CACHED1   | DDX5     | DCUN1D1  | SEPT5   |
| CACNA2D1  | DEGS1    | DDX3X    | SGCA    |
| CALCOCO2  | DERL2    | DHX9     | SLC38A5 |
| CAMK2D    | DNAJC13  | DIRC2    | SLC4A3  |
| CAMSAP2   | DNMBP    | DNAJC10  | SNTA1   |
| CAPN2     | DPYD     | DOCK10   | SPRYD3  |
| CAPRIN1   | DR1      | DPYD     | ST3GAL4 |
| CAPZA2    | DTX3L    | DSEL     | TAGLN   |
| CAST      | DYNLL1   | DTX3L    | TMEM141 |
| CAV1      | EDA2R    | EFNA5    | UXT     |
| CAV2      | EDEM1    | EGFR     | VAMP5   |
| CCAR1     | EGR1     | EIF2AK2  |         |
| CCDC6     | EHBP1    | EIF2S3   |         |
| CCNG1     | EIF2AK2  | EIF3A    |         |
| CCNT1     | EIF3A    | EIF3J    |         |
| CCT6A     | EIF5     | EIF3M    |         |
| CD109     | ELK3     | EIF5     |         |
| CD47      | EPB41L2  | EPS8     |         |
| CD9       | F2R      | ERBB2IP  |         |
| CDC42EP3  | F3       | ERP44    |         |
| CDK17     | FAM208A  | FAM13B   |         |
| CDV3      | FAM35A   | FAM208A  |         |
| CEP170    | FAM91A1  | FAM86C1  |         |
| CFL2      | FBXO30   | FASN     |         |
| CHAMP1    | FERMT2   | FBXL3    |         |
| CHIC2     | FGF2     | FERMT2   |         |
| CKAP2     | FNDC3A   | FGF2     |         |
| CKAP5     | FOXJ3    | FST      |         |
| CLIC4     | GFPT1    | FUBP3    |         |
| CLINT1    | GLI3     | GDAP2    |         |
| CLOCK     | GMFB     | GFPT1    |         |
| CLTC      | GMPS     | GLI3     |         |
| CMPK1     | GNAQ     | GLUD1    |         |
| CMTM6     | GNG12    | GNAQ     |         |
| CNEP1R1   | GPR39    | GNPNAT1  |         |
| CNIH1     | GSK3B    | GNPTAB   |         |
| CNOT1     | GSPT1    | GNS      |         |
| CNOT4     | HEATR1   | GSPT1    |         |
| CNOT7     | HELZ     | HAS2     |         |
| COLEC12   | HERC4    | HBS1L    |         |
| COPB1     | HGF      | HECTD1   |         |
| COPB2     | HHIPL2   | HERC4    |         |
| COPS2     | HIVEP2   | HIVEP2   |         |
| COX16     | HPRT1    | HNRNPK   |         |
| COX20     | HS2ST1   | HNRNPR   |         |
| CPEB2     | HSD17B12 | HP1BP3   |         |
| CREBBP    | HSP90AA1 | HSP90AA1 |         |
| CRK       | IDH3A    | IARS2    |         |
| CSNK2A1   | IGF2BP2  | IKBIP    |         |
| CTBP1-AS2 | IL6ST    | IMPAD1   |         |
|           | CUL3     | INPP4B   |         |
|           | CYB5B    | INSIG1   |         |
|           | CYBRD1   | IQGAP1   |         |
|           | CYP1B1   | ITGA2    |         |
|           | DARS     | ITM2B    |         |
|           | DCAF6    | JUN      |         |
|           | DCBLD1   | KCMF1    |         |
|           | DCBLD2   | KCNMA1   |         |
|           | DCTN6    | KDEL2    |         |
|           | DCUN1D1  | LARP4B   |         |
|           | DCUN1D5  | LBR      |         |

|           |         |           |         |
|-----------|---------|-----------|---------|
| CAV1      | COX20   | DTX3L     | SLC38A5 |
| CAV2      | CRK     | EFNA5     | SLC4A3  |
| CCDC6     | CSNK2A1 | EGR1      | SNTA1   |
| CD44      | CTHRC1  | EIF2S1    | SPRYD3  |
| CD47      | CUL1    | EIF4G2    | ST3GAL4 |
| CD9       | DARS    | ERP44     | TAGLN   |
| CDC42EP3  | DCBLD2  | F2R       | TMEM141 |
| CDK12     | DCUN1D5 | F3        | TMEM9   |
| CDV3      | DDX6    | FAM208A   | UQCRCQ  |
| CEP170    | DEGS1   | FBXO28    | UXT     |
| CFL2      | DERL2   | G3BP1     | VAMP5   |
| CHAMP1    | DHX15   | GDI2      | YBX1    |
| CLIC4     | DHX9    | GFPT1     |         |
| CLMP      | DIRC2   | GLUD1     |         |
| CLOCK     | DNAJC13 | GNAQ      |         |
| CMPK1     | DNMBP   | GNG11     |         |
| CMTM6     | DOCK10  | GNS       |         |
| CNEP1R1   | DPYD    | GOLT1B    |         |
| CNOT1     | DSEL    | GPBP1     |         |
| CNOT11    | DYNLL1  | GSPT1     |         |
| CNOT4     | EDEM1   | GSR       |         |
| CNOT7     | EHBP1   | HDAC2     |         |
| COLEC12   | EIF2AK2 | HECTD1    |         |
| COPB1     | EIF2S3  | HELZ      |         |
| COX20     | EIF5    | HERC4     |         |
| CPEB2     | EPB41L2 | HIF1A     |         |
| CPNE3     | ERLIN1  | IARS      |         |
| CREBBP    | ERRF1   | IARS2     |         |
| CRK       | ETV1    | INSIG1    |         |
| CSNK2A1   | F3      | ISCA1     |         |
| CTBP1-AS2 | FAM122B | ITGB1     |         |
|           | FAM208A | ITM2B     |         |
|           | FAM35A  | KCMF1     |         |
|           | FAM86C1 | KCNMA1    |         |
|           | FAM91A1 | KIAA0196  |         |
|           | FASN    | KIAA1430  |         |
|           | FBXL3   | KIF5B     |         |
|           | FBXO10  | KPNA3     |         |
|           | FBXO30  | KPNB1     |         |
|           | FERMT2  | LARP4B    |         |
|           | FGF2    | LBR       |         |
|           | FOXJ3   | LHFPL2    |         |
|           | FUBP3   | LIPA      |         |
|           | FZD6    | LMAN1     |         |
|           | G3BP1   | LMBRD1    |         |
|           | GDAP2   | LPIN1     |         |
|           | GFPT1   | LRPPRC    |         |
|           | GJ1     | LY6G5B    |         |
|           | GMFB    | MAN1A1    |         |
|           | GNAQ    | MAP3K7    |         |
|           | GNG12   | MAPK1     |         |
|           | GNPNAT1 | MAPK11P1L |         |
|           | GPR39   | MB21D2    |         |
|           | HDHD1   | ME1       |         |
|           | HELZ    | MET       |         |
|           | HEXB    | MMD       |         |
|           | HHIPL2  | MRGPRF    |         |
|           | HMGCR   | MRPL45    |         |
|           | HNRNPH2 | MRPS6     |         |
|           | HNRNPK  | MSL2      |         |
|           | HOXA9   | MTDH      |         |
|           | HPRT1   | MYO1B     |         |

|           |          |           |         |         |
|-----------|----------|-----------|---------|---------|
| CAB39     | CD47     | EGFR      | POLR2G  | SPRYD3  |
| CACHED1   | CD9      | EGR1      | PSMB5   | ST3GAL4 |
| CACNA2D1  | CDC42EP3 | EIF2AK2   | PTPRN   | TMEM141 |
| CALCOCO2  | CDK17    | EIF2S1    | RASD2   | TMEM9   |
| CAMK2D    | CDV3     | ENY2      | RGS16   | TRAPPC4 |
| CAMSAP2   | CEP170   | EPB41L2   | RHOD    | UQCRCQ  |
| CAPN2     | CFL2     | ERBB2IP   | RNASE3  | VAMP5   |
| CAPRIN1   | CHAMP1   | F3        | RPS4X   | WFDC1   |
| CAPZA2    | CHIC2    | FERMT2    | SCARF2  | YBX1    |
| CAST      | CKAP2    | FGF2      | SDF2    |         |
| CAV1      | CKAP5    | FNDC3A    | SDHC    |         |
| CAV2      | CLIC4    | FNDC3B    | SEL1L3  |         |
| CCAR1     | CLOCK    | G3BP1     | SELM    |         |
| CCDC6     | CLTC     | GBE1      | SEPT5   |         |
| CCNG1     | CMPK1    | GJC1      | SGCA    |         |
| CCNT1     | CMTM6    | GLT8D1    | SLC4A3  |         |
| CCT6A     | CNIH1    | GLUD1     | SNTA1   |         |
| CD109     | CNOT1    | GMPS      | SPRYD3  |         |
| CD47      | CNOT4    | GNAQ      | ST3GAL4 |         |
| CD9       | CNOT7    | GNPTAB    | TMEM141 |         |
| CDC42EP3  | COLEC12  | GNS       | TMEM9   |         |
| CDK17     | COPB1    | GSK3B     | TRAPPC4 |         |
| CDV3      | COPB2    | GSPT1     | UQCRCQ  |         |
| CEP170    | COX20    | HELZ      | VAMP5   |         |
| CFL2      | CPEB2    | HERPUD2   | WFDC1   |         |
| CHAMP1    | CREBBP   | HGF       | YBX1    |         |
| CHIC2     | CRK      | HIBADH    |         |         |
| CKAP2     | CSNK2A1  | HIF1A     |         |         |
| CKAP5     | CUL3     | HNRNPA2B1 |         |         |
| CLIC4     | CYB5B    | HNRNPH2   |         |         |
| CLINT1    | CYBRD1   | HNRNPR    |         |         |
| CLOCK     | CYP1B1   | IDE       |         |         |
| CLTC      | DARS     | IL6ST     |         |         |
| CMPK1     | DCAF6    | ITFG1     |         |         |
| CMTM6     | DCBLD1   | JKAMP     |         |         |
| CNEP1R1   | DCBLD2   | KCMF1     |         |         |
| CNIH1     | DCTN6    | KCNMA1    |         |         |
| CNOT1     | DCUN1D1  | KDEL2     |         |         |
| CNOT4     | DDX1     | KHDRBS1   |         |         |
| CNOT7     | DDX3X    | KIAA0196  |         |         |
| COLEC12   | DDX47    | KIAA0430  |         |         |
| COPB1     | DDX5     | KPNB1     |         |         |
| COPB2     | DDX6     | LARP4B    |         |         |
| COPS2     | DEGS1    | LBR       |         |         |
| COX16     | DERL2    | LMAN1     |         |         |
| COX20     | DHX15    | LMBRD1    |         |         |
| CPEB2     | DHX9     | LRPPRC    |         |         |
| CREBBP    | DIP2B    | LRR8C8    |         |         |
| CRK       | DNAJC10  | LY6G5B    |         |         |
| CSNK2A1   | DNAJC13  | MAN1A1    |         |         |
| CTBP1-AS2 | DNAJC3   | MAN2A1    |         |         |
|           | CUL3     | DNMBP     |         |         |
|           | CYB5B    | DPYD      |         |         |
|           | CYBRD1   | DYNC112   |         |         |
|           | CYP1B1   | DYNLT3    |         |         |
|           | DARS     | EDEM1     |         |         |
|           | DCAF6    | EFNA5     |         |         |
|           | DCBLD1   | EGR1      |         |         |
|           | DCBLD2   | EHBP1     |         |         |
|           | DCTN6    | EIF2AK2   |         |         |
|           | DCUN1D1  | EIF2S3    |         |         |
|           | DCUN1D5  | EIF3H     |         |         |

|         |           |           |          |           |          |         |          |          |
|---------|-----------|-----------|----------|-----------|----------|---------|----------|----------|
| DDX1    | LHFP      | KIAA1715  | EIF2AK2  | HPS3      | MYO5A    | DDX1    | EIF3J    | MMADHC   |
| DDX17   | LHFPL2    | KITLG     | EIF2S1   | HS2ST1    | NAMPT    | DDX17   | EIF5     | MMD      |
| DDX3X   | LINC00152 | KPNA4     | EIF2S3   | HSD17B12  | NCKAP1   | DDX17X  | ELK3     | MOB1B    |
| DDX47   | LOC150381 | KPNB1     | EIF4G2   | HSP90AA1  | NCOA4    | DDX47   | ELOVL5   | MYO1B    |
| DDX5    | LPAR1     | LAMB1     | EIF5     | IDH3A     | NF1      | DDX5    | EPB41L2  | NABP1    |
| DDX6    | LPP       | LAPTM4A   | EPB41L2  | IGF2BP2   | NFAT5    | DDX6    | EPS8     | NARS     |
| DEGS1   | LRRC8C    | LHFP      | ERLIN1   | IKBIP     | NNT      | DEGS1   | ERRF1    | NCOA4    |
| DERL2   | MAN2A1    | LHFPL2    | ERP44    | IMPAD1    | NONO     | DERL2   | EXOC5    | NPTX1    |
| DHX15   | MAP1LC3B  | LIMA1     | ERRF1    | INSIG1    | NPEPPS   | DHX15   | F2R      | NR1D2    |
| DHX9    | MDFIC     | MAN1      | ETV1     | IQGAP1    | NPTN     | DHX9    | F3       | NREP     |
| DIP2B   | MED13     | LOC150381 | F2R      | ITCH      | NR1D2    | DIP2B   | FAM126A  | NRP1     |
| DNAJC10 | MET       | LPIN1     | F3       | ITFG1     | NR3C1    | DNAJC10 | FAM35A   | NSF      |
| DNAJC13 | METTL7A   | LYSMD3    | FAM122B  | ITGB1     | NREP     | DNAJC13 | FAM86C1  | NT5C2    |
| DNAJC3  | MFN1      | MALAT1    | FAM208A  | JUN       | NRP1     | DNAJC3  | FAM91A1  | NT5E     |
| DNMBP   | MFSD1     | MAML2     | FAM35A   | KCMF1     | NT5C2    | DNMBP   | FAM96A   | NUCKS1   |
| DPYD    | MGST1     | MAN1A1    | FAM86C1  | KIAA0430  | NUP98    | DPYD    | FASN     | NUP98    |
| DYNC1H1 | MMD       | MAP1B     | FAM91A1  | KIAA1033  | OCIAD1   | DYNC1H1 | FBXL3    | PAPOLA   |
| DYNC1I2 | MOB1A     | MAP1LC3B  | FASN     | KIAA1430  | OSMR     | DYNC1I2 | FBXO10   | PATL1    |
| DYNLT3  | MOB1B     | MAP4K4    | FBXL3    | KIAA1715  | PAK2     | DYNLT3  | FBXO28   | PAXBP1   |
| EDEM1   | MRGPRF    | MAP4K5    | FBXO10   | KITLG     | PANK3    | EDEM1   | FERMT2   | PBX3     |
| EFNA5   | MRPS6     | MARCH7    | FBXO28   | KPNA4     | PANX1    | EFNA5   | FNDC3A   | PCNX     |
| EGFR    | MYO5A     | MCL1      | FBXO30   | LDHB      | PAPOLA   | EGFR    | FNDC3B   | PDCD6IP  |
| EGR1    | NABP1     | MCM4      | FERMT2   | LHFPL2    | PATL1    | EGR1    | FOXJ3    | PITPNB   |
| EHBP1   | NF1       | MDFIC     | FGF2     | LIMA1     | PBX1     | EHBP1   | FUBP3    | PITPNC1  |
| EIF2AK2 | NMT2      | MDM2      | FOXJ3    | LOC150381 | PDGFC    | EIF2AK2 | FZD6     | PKN2     |
| EIF2S1  | NR1D2     | ME1       | FUBP3    | LPAR1     | PITPNB   | EIF2S1  | G3BP1    | PPP3CA   |
| EIF2S3  | NR3C1     | MED13     | FZD6     | LPIN1     | PITPNC1  | EIF2S3  | GBE1     | PPP6C    |
| EIF3H   | NREP      | MED13L    | G3BP1    | LRPPRC    | PLS3     | EIF3H   | GDAP2    | PPP6R3   |
| EIF3J   | NRP1      | MET       | GDAP2    | LRRC37BP1 | PPP1CC   | EIF3J   | GDI2     | PREPL    |
| EIF5    | NT5C2     | METAP2    | GDI2     | LRRC8C    | PPP1R12A | EIF5    | GFPT1    | PRKAR1A  |
| ELK3    | NTNG1     | METTL9    | GFPT1    | LY6G5B    | PPP2CA   | ELK3    | GJC1     | PRKCA    |
| ELOVL5  | OCIAD1    | MKLN1     | GJC1     | MAN2A1    | PPP2R2A  | ELOVL5  | GMFB     | PRR14L   |
| ENY2    | OSBP1L8   | MMADHC    | GLUD1    | MAP4K4    | PPP2R5E  | ENY2    | GNG12    | PSMD1    |
| EPB41L2 | OSMR      | MMD       | GMFB     | MAPK1IP1L | PPP3CA   | EPB41L2 | GNPNAT1  | PTBP1    |
| EPS8    | PABPN1    | MMGT1     | GNAQ     | MB21D2    | PPP6R3   | EPS8    | GOLT1B   | PXN      |
| ERBB2IP | PAK2      | MOB1B     | GNG11    | MCFD2     | PREPL    | ERBB2IP | GPRC5A   | PYGL     |
| ERRF1   | PANK3     | MRPL45    | GNG12    | MED1      | PRICKLE1 | ERRF1   | GSPT1    | QKI      |
| EXOC5   | PAPD4     | MRPL50    | GNPNAT1  | MED13     | PRKAR1A  | EXOC5   | HDAC2    | RAB14    |
| F2R     | PBX1      | MSL2      | GNS      | MED13L    | PRKCA    | F2R     | HDHD1    | RAB23    |
| F3      | PCYOX1    | MTDH      | GOLT1B   | MKLN1     | PRR14L   | F3      | HELZ     | RAB3GAP2 |
| FAM126A | PDGFC     | MYO1B     | GPBP1    | MMD       | PRRC2C   | FAM126A | HERC4    | RAB7A    |
| FAM35A  | PERP      | PERP      | GPR39    | MMP16     | PSCMA4   | FAM35A  | HERPUD2  | RANBP9   |
| FAM86C1 | PGRMC1    | NAMPT     | GSPT1    | MOB1A     | PTBP1    | FAM86C1 | HHIPL2   | RARS     |
| FAM91A1 | PHLDA1    | NF1       | GSR      | MRGPRF    | PTBP3    | FAM91A1 | HIATL1   | RASSF8   |
| FAM96A  | PIGX      | NFAT5     | HDAC2    | MSL2      | PTP4A1   | FAM96A  | HMGCR    | REV3L    |
| FASN    | PIK3R1    | NNT       | HDHD1    | MTRR      | PTPN14   | FASN    | HNRNPH2  | RNF130   |
| FBXL3   | PLAG1     | NPEPPS    | HECTD1   | NAE1      | PTPRK    | FBXL3   | HNRNPK   | ROBO1    |
| FBXO10  | PPP1R12A  | NUDT21    | HELZ     | NAMPT     | RAB10    | FBXO10  | HNRNPR   | RRAGC    |
| FBXO28  | PPP3CA    | NUP155    | HERC4    | NCKAP1    | RAB3B    | FBXO28  | HOXA9    | RTN4     |
| FERMT2  | PPP6C     | NUP98     | HEXB     | NFE2L2    | RAB7A    | FERMT2  | HPRT1    | RYK      |
| FGF2    | PPP6R3    | ORC3      | HHIPL2   | NOL9      | RAB8B    | FGF2    | HSP90AA1 | S100A10  |
| FNDC3A  | PRKDC     | PAIP2     | HIF1A    | NR1D2     | RAC1     | FNDC3A  | HSP90B1  | SAP30    |
| FNDC3B  | PRR14L    | PAK2      | HMGCR    | NRD1      | RAP2A    | FNDC3B  | HSPH1    | SCAF8    |
| FOXJ3   | PRRC1     | PDGFC     | HNRNPH2  | NSF       | RCN1     | FOXJ3   | IDE      | SCAMP1   |
| FUBP3   | PSD3      | PEG10     | HNRNPK   | NT5C2     | RCN2     | FUBP3   | IDH3A    | SCCPDH   |
| FZD6    | PSMD1     | PERP      | HOXA9    | NTNG1     | REEP3    | FZD6    | IFI16    | SEC63    |
| G3BP1   | PSME4     | PGM3      | HPRT1    | NUCKS1    | REV3L    | G3BP1   | IFNAR1   | SEPT10   |
| GBE1    | PTBP1     | PHTF2     | HPS3     | NXF1      | RGMB     | GBE1    | INPP4B   | SERINC1  |
| GDAP2   | PTBP3     | PIGX      | HS2ST1   | OSBP1L    | RNF11    | GDAP2   | INSIG1   | SERPINE2 |
| GDI2    | PTP4A2    | PKN2      | HSD17B12 | PABPN1    | RNF130   | GDI2    | IQGAP1   | SERTAD2  |
| GFPT1   | PUM2      | PLAG1     | HSP90AA1 | PAIP2     | RPS27L   | GFPT1   | ITCH     | SFT2D1   |
| GJC1    | PVRL3     | PLS3      | IARS     | PANK3     | RTN4     | GJC1    | ITGA2    | SFT2D2   |

|           |          |          |
|-----------|----------|----------|
| GLT8D1    | PXN      | PPCS     |
| GLUD1     | PYGL     | PPP1CC   |
| GMFB      | QKI      | PPP2CA   |
| GMPS      | RAB10    | PPP2R2A  |
| GNAQ      | RAB1A    | PPP2R5E  |
| GNG12     | RAB23    | PRDM8    |
| GNPNAT1   | RAB2A    | PRICKLE1 |
| GNPTAB    | RAB5A    | PRKAA1   |
| GNS       | RAB8B    | PRKCA    |
| GOLT1B    | RAC1     | PSD3     |
| GPRC5A    | RALGPS2  | PSMA4    |
| GSK3B     | RAP2A    | PTPN14   |
| GSPT1     | RAP2B    | PTX3     |
| HDAC2     | RASSF8   | PXN      |
| HDHD1     | RBFOX2   | PYGL     |
| HELZ      | REEP3    | QKI      |
| HERC4     | RGL1     | RAB1A    |
| HERPUD2   | RHOBTB3  | RAB21    |
| HGF       | ROBO1    | RAB23    |
| HHIPL2    | RRAGC    | RAB2A    |
| HIATL1    | RSPRY1   | RAB5A    |
| HIBADH    | RYBP     | RANBP9   |
| HIF1A     | SAP30    | RAP2B    |
| HMGCR     | SAR1B    | RBMS1    |
| HNRNPA2B1 | SBF2     | RBPJ     |
| HNRNPH2   | SCAF8    | RCN1     |
| HNRNPK    | SCARB2   | REEP3    |
| HNRNPR    | SDC4     | REV3L    |
| HOXA9     | SDCBP    | RFX7     |
| HPRT1     | SEC63    | RPS27L   |
| HSP90AA1  | SEL1L    | RTN4     |
| HSP90B1   | SEMA5A   | RYBP     |
| HSPH1     | SERPINE2 | RYK      |
| IDE       | SERTAD2  | SAMD8    |
| IDH3A     | SET      | SDCBP    |
| IFI16     | SETD5    | SDCCAG3  |
| IFNAR1    | SFT2D1   | SEC22B   |
| IL6ST     | SFT2D2   | SEC23A   |
| INPP4B    | SFXN1    | SECTM1   |
| INSIG1    | SGCB     | SEMA5A   |
| IQGAP1    | SGCE     | SEMA6D   |
| ITCH      | SHOC2    | SEPT10   |
| ITFG1     | SLAIN2   | SEPT11   |
| ITGA2     | SLC16A6  | SEPT7    |
| ITGB1     | SLC20A1  | SERBP1   |
| ITM2B     | SLC35A5  | SF3B14   |
| JKAMP     | SLC38A2  | SFT2D2   |
| KCMF1     | SLC44A1  | SLAIN2   |
| KCNMA1    | SLC5A3   | SLC17A5  |
| KDEL2     | SMAD2    | SLC25A33 |
| KHDRBS1   | SMAD3    | SLC30A1  |
| KIAA0196  | SMARCA1  | SLC30A7  |
| KIAA0430  | SOAT1    | SLC9A6   |
| KIAA1033  | SOCS6    | SLC9A7   |
| KIAA1715  | SPSB1    | SMAD2    |
| KIF5B     | SQLE     | SMAD3    |
| KITLG     | SRSF2    | SMAD5    |
| KMT2E     | SSB      | SMURF2   |
| KPNA3     | STK17A   | SNX6     |
| KPNA4     | STK38    | SOCS5    |
| KPNB1     | STMN1    | SOCS6    |
| LAMP2     | STOM     | SPATS2L  |

|            |          |           |
|------------|----------|-----------|
| IARS2      | PANX1    | SCAF8     |
| IDH3A      | PAPOLA   | SCARB2    |
| IGF2BP2    | PATL1    | SCCPDH    |
| IKBIP      | PBX1     | SDCCAG3   |
| IMPAD1     | PCNX     | SEMA3C    |
| INSIG1     | PIGX     | SEMA5A    |
| IQGAP1     | PITPNB   | SEMA6D    |
| ISCA1      | PITPNC1  | SEPT10    |
| ITCH       | POLR2B   | SERINC1   |
| ITFG1      | POMK     | SERTAD2   |
| ITGB1      | PPP1CB   | SETD5     |
| ITM2B      | PPP1CC   | SFPQ      |
| JUN        | PPP1R12A | SFT2D1    |
| KCMF1      | PPP6C    | SFT2D2    |
| KCNMA1     | PPP6R3   | SKAP2     |
| KIAA0196   | PRKDC    | SLC20A1   |
| KIAA0430   | PROS1    | SLC35F5   |
| KIAA1033   | PRR14L   | SLC5A3    |
| KIAA1430   | PSD3     | SLC9A1    |
| KIAA1715   | PSMD1    | SLC9A6    |
| KIF5B      | PSME4    | SLC9A7    |
| KITLG      | PTBP1    | SLFN5     |
| KPNA3      | PTBP3    | SMAD2     |
| KPNA4      | PUM2     | SMAD3     |
| KPNB1      | PVRL3    | SMARCA1   |
| LARP4B     | PXK      | SMNDC1    |
| LBR        | PXN      | SNX6      |
| LDHB       | RAB10    | SOCS5     |
| LHFPL2     | RAB21    | SPRED1    |
| LIMA1      | RAB8B    | SSFA2     |
| LIPA       | RAP2A    | SSR1      |
| LMAN1      | RAP2B    | STARD3NL  |
| LMBRD1     | RASA1    | STK38     |
| LOC150381  | RASSF8   | STMN1     |
| LPAR1      | RBMS1    | STOM      |
| LPIN1      | REEP3    | SUB1      |
| LRPPRC     | RFX7     | SUCLG2    |
| LRRRC37BP1 | RNF11    | SUPT20H   |
| LRRRC8C    | RNF146   | SUZ12     |
| LY6G5B     | ROBO1    | SYPL1     |
| MAN1A1     | RPF2     | TAB2      |
| MAN2A1     | RRAGC    | TCEB3     |
| MAP3K7     | RRM1     | TCF12     |
| MAP4K4     | RSPRY1   | TEAD1     |
| MAPK1      | RUNX1    | TFDP1     |
| MAPK11P1L  | RYK      | TGFBR3    |
| MB21D2     | S100A10  | TIMP2     |
| MCFD2      | SAMD8    | TIPARP    |
| ME1        | SAR1A    | TM9SF2    |
| MED1       | SBF2     | TMED5     |
| MED13      | SC5D     | TMED7     |
| MED13L     | SCAF8    | TMEM123   |
| MET        | SCARB2   | TMEM14B   |
| MKLN1      | SDC4     | TMEM19    |
| MMD        | SDCCAG3  | TMEM243   |
| MMP16      | SEC23A   | TMEM30A   |
| MOB1A      | SEC62    | TMEM55A   |
| MRGPRF     | SEC63    | TMEM87B   |
| MRPL45     | SEPT7    | TMEM9B    |
| MRPS6      | SET      | TNFAIP3   |
| MSL2       | SFT2D1   | TNFRSF11B |
| MTDH       | SFXN1    | TOB1      |

|           |            |          |
|-----------|------------|----------|
| GLT8D1    | ITGB1      | SFXN1    |
| GLUD1     | ITM2B      | SGCE     |
| GMFB      | KCMF1      | SH3BGRL  |
| GMPS      | KIAA0196   | SKAP2    |
| GNAQ      | KIAA1033   | SLC25A33 |
| GNG12     | KIAA1715   | SLC30A1  |
| GNPNAT1   | KIF5B      | SLC30A5  |
| GNPTAB    | KITLG      | SLC44A1  |
| GNS       | KMT2E      | SLC9A6   |
| GOLT1B    | KPNA3      | SLC9A7   |
| GPRC5A    | KPNA4      | SLFN5    |
| GSK3B     | KPNB1      | SMAD3    |
| GSPT1     | LAMP2      | SMAD4    |
| HDAC2     | LAPTM4A    | SMAD5    |
| HDHD1     | LARP4B     | SNX3     |
| HELZ      | LBR        | SNX6     |
| HERC4     | LHFPL2     | SOCS5    |
| HERPUD2   | LIMA1      | SPATS2L  |
| HGF       | LMBRD1     | SPIN1    |
| HHIPL2    | LOC150381  | SPPL2A   |
| HIATL1    | LPAR1      | SPRED1   |
| HIBADH    | LPCAT2     | SPRY2    |
| HIF1A     | LPIN1      | SRGAP1   |
| HMGCR     | LRCH3      | STK38    |
| HNRNPA2B1 | LRPPRC     | STMN1    |
| HNRNPH2   | LRRRC37BP1 | STOM     |
| HNRNPK    | LRRRC8C    | STT3B    |
| HNRNPR    | LSM6       | SUB1     |
| HOXA9     | LUC7L2     | SUMO2    |
| HPRT1     | LURAP1L    | SUPT16H  |
| HSP90AA1  | LUZP6      | SUZ12P1  |
| HSP90B1   | LY6G5B     | SYPL1    |
| HSPH1     | MAN2A1     | TBL1XR1  |
| IDE       | MAP1LC3B   | TCEB3    |
| IDH3A     | MAP4K4     | TCP1     |
| IFI16     | MAP4K5     | TEAD1    |
| IFNAR1    | MAPK1      | TFDP1    |
| IL6ST     | MAPK11P1L  | TFRC     |
| INPP4B    | MASP1      | TGFBR3   |
| INSIG1    | MATR3      | TIMP2    |
| IQGAP1    | MCM4       | TM9SF3   |
| ITCH      | MDFC       | TMED2    |
| ITFG1     | MDM2       | TMEM260  |
| ITGA2     | MED1       | TMEM50B  |
| ITGB1     | MED13      | TMEM9B   |
| ITM2B     | MED13L     | TMPO     |
| JKAMP     | MEIS2      | TNPO1    |
| KCMF1     | MET        | TOP1     |
| KCNMA1    | METTL9     | TPBG     |
| KDEL2     | MKLN1      | TRA2A    |
| KHDRBS1   | MOB1A      | TRAM1    |
| KIAA0196  | MRGPRF     | UACA     |
| KIAA0430  | MRPS6      | UBE2R2   |
| KIAA1033  | MTMR6      | UBXN4    |
| KIAA1715  | MTRR       | UBXN7    |
| KIF5B     | MYO1B      | UGDH     |
| KITLG     | MYO5A      | UHMK1    |
| KMT2E     | NAA50      | VAPA     |
| KPNA3     | NAE1       | VEZF1    |
| KPNA4     | NAMPT      | VPS35    |
| KPNB1     | NARS       | VTA1     |
| LAMP2     | NCKAP1     | WBP11    |

|           |         |           |
|-----------|---------|-----------|
| LAPTM4A   | STX2    | SPIN1     |
| LARP4B    | STYX    | SPRY2     |
| LBR       | SUCLG2  | SPSB1     |
| LHFPL2    | SUZ12   | SQLE      |
| LIMA1     | SYPL1   | SRPK1     |
| LMAN1     | SYT14   | SS18      |
| LMBRD1    | TAB2    | SFFA2     |
| LOC150381 | TAF9    | STK17B    |
| LPAR1     | TAOK1   | STOM      |
| LPCAT2    | TCEB3   | STX2      |
| LPIN1     | TCF12   | SUCLG2    |
| LRCH3     | TFAP2C  | SUPT16H   |
| LRPPRC    | TIMP2   | SUPT20H   |
| LRRC37BP1 | TMEM165 | SUZ12P1   |
| LRRC8C    | TMEM243 | SYT14     |
| LSM6      | TMTC1   | TAB2      |
| LUC7L2    | TNFAIP3 | TAF9      |
| LURAP1L   | TOB1    | TAOK1     |
| LUZP6     | TOP1    | TBL1XR1   |
| LY6G5B    | TPBG    | TBX3      |
| MAN1A1    | TRIP12  | TCEB3     |
| MAN2A1    | TRPS1   | TCF12     |
| MAP1LC3B  | TSPAN5  | TFDP1     |
| MAP3K7    | TUBB4A  | TFRC      |
| MAP4K4    | TWIST1  | TGFBR3    |
| MAP4K5    | UACA    | TMED7     |
| MAPK1     | UBE2D1  | TMEM123   |
| MAPK1IP1L | UBE2R2  | TMEM14B   |
| MASP1     | UBXN7   | TMEM50B   |
| MATR3     | UGCG    | TMEM55A   |
| MCFD2     | USO1    | TMEM87B   |
| MCM4      | USP53   | TMEM9B    |
| MDFIC     | VEZF1   | TNFRSF11B |
| MDM2      | VPS35   | TPP2      |
| ME1       | WEE1    | TPT1      |
| MED1      | WLS     | TSPAN5    |
| MED13     | WNK1    | TUBB4A    |
| MED13L    | YAP1    | UACA      |
| MEIS2     | ZBTB2   | UBE2R2    |
| MET       | ZC3HAV1 | UBL3      |
| METTL9    | ZDHHC2  | UGDH      |
| MINPP1    | ZIC1    | UHMK1     |
| MKLN1     | ZNF655  | USP14     |
| MMADHC    | ZYG11B  | USP34     |
| MMD       |         | VEZF1     |
| MOB1A     |         | WDR26     |
| MOB1B     |         | WDR82     |
| MRGPRF    |         | WNK1      |
| MRPS6     |         | XPO1      |
| MTMR6     |         | YTHDF1    |
| MTRR      |         | YWHAB     |
| MYO1B     |         | ZC3H11A   |
| MYO5A     |         | ZC3HAV1L  |
| NAA50     |         | ZDHHC2    |
| NABP1     |         | ZFAND5    |
| NAE1      |         | ZFP36L2   |
| NAMPT     |         | ZFR       |
| NARS      |         | ZMYM4     |
| NCKAP1    |         |           |
| NCL       |         |           |
| NCOA4     |         |           |
| NF1       |         |           |

|          |          |         |
|----------|----------|---------|
| MTRR     | SGCB     | TPP2    |
| MYO1B    | SGCE     | TRPS1   |
| MYO5A    | SHOC2    | TUSC3   |
| NAE1     | SLC16A6  | TWIST1  |
| NAMPT    | SLC17A5  | TXNL1   |
| NCKAP1   | SLC20A1  | UBE2D1  |
| NCOA4    | SLC25A32 | UBE2R2  |
| NF1      | SLC25A46 | UBE3C   |
| NFAT5    | SLC30A5  | UGCG    |
| NFE2L2   | SLC35A5  | USP14   |
| NNT      | SLC35F5  | VHL     |
| NOL9     | SMAD2    | VPS35   |
| NONO     | SMAD4    | WBP11   |
| NPEPPS   | SMARCA1  | WDR82   |
| NPTN     | SNAPC3   | WNK1    |
| NR1D2    | SNX6     | WSB1    |
| NR3C1    | SOCS5    | YTHDC1  |
| NRD1     | SOCS6    | ZBED5   |
| NREP     | SPATS2L  | ZBTB2   |
| NRP1     | SPIN1    | ZC3H7A  |
| NSF      | SPRED1   | ZDHHC2  |
| NT5C2    | SPSB1    | ZFAND5  |
| NTNG1    | SRPK1    | ZFP36L2 |
| NUCKS1   | SS18     | ZFR     |
| NUP98    | SSFA2    | ZMIZ1   |
| NXF1     | STAM2    | ZNF148  |
| OCIA1    | STARD3NL | ZNF521  |
| OSBPL8   | STK17A   | ZYG11B  |
| OSMR     | STMN1    |         |
| PABPN1   | STOM     |         |
| PAIP2    | STX2     |         |
| PAK2     | STYX     |         |
| PANK3    | SUPT16H  |         |
| PANX1    | SUZ12    |         |
| PAPOLA   | SUZ12P1  |         |
| PATL1    | TAB2     |         |
| PBX1     | TACC1    |         |
| PCNX     | TAF9     |         |
| PDGFC    | TAOK1    |         |
| PIGX     | TBL1XR1  |         |
| PITPNB   | TCEB3    |         |
| PITPNC1  | TCP1     |         |
| PLS3     | TFDP1    |         |
| POLR2B   | TFRC     |         |
| POMK     | TGFBR3   |         |
| PPP1CB   | TIMP2    |         |
| PPP1CC   | TIPRL    |         |
| PPP1R12A | TMEM165  |         |
| PPP2CA   | TMEM19   |         |
| PPP2R2A  | TMEM248  |         |
| PPP2R5E  | TMEM260  |         |
| PPP3CA   | TMX3     |         |
| PPP6C    | TNPO1    |         |
| PPP6R3   | TNRC6A   |         |
| PREPL    | TOB1     |         |
| PRICKLE1 | TPBG     |         |
| PRKAR1A  | TRIP12   |         |
| PRKCA    | TSPAN5   |         |
| PRKDC    | TTPAL    |         |
| PROS1    | TUBB4A   |         |
| PRR14L   | UBE3C    |         |
| PRRC2C   | UBXN7    |         |

|           |          |          |
|-----------|----------|----------|
| LAPTM4A   | NCL      | WDR82    |
| LARP4B    | NF1      | WEE1     |
| LBR       | NFAT5    | XRCC5    |
| LHFPL2    | NMT2     | YME1L1   |
| LIMA1     | NNT      | YTHDF1   |
| LMAN1     | NPEPPS   | ZBTB2    |
| LMBRD1    | NPTN     | ZC3H11A  |
| LOC150381 | NR3C1    | ZC3H7A   |
| LPAR1     | NRP1     | ZC3HAV1L |
| LPCAT2    | NSF      | ZDHHC2   |
| LPIN1     | NSMAF    | ZFR      |
| LRCH3     | NT5C2    | ZNF521   |
| LRPPRC    | NTNG1    | ZNF655   |
| LRRC37BP1 | NUFIP2   | ZYG11B   |
| LRRC8C    | NUP98    |          |
| LSM6      | NUSAP1   |          |
| LUC7L2    | NXF1     |          |
| LURAP1L   | PABPN1   |          |
| LUZP6     | PANK3    |          |
| LY6G5B    | PAPOLA   |          |
| MAN1A1    | PATL1    |          |
| MAN2A1    | PCMTD1   |          |
| MAP1LC3B  | PCYOX1   |          |
| MAP3K7    | PDCD6IP  |          |
| MAP4K4    | PDS5A    |          |
| MAP4K5    | PGM3     |          |
| MAPK1     | PGRMC1   |          |
| MAPK1IP1L | PHLDA1   |          |
| MASP1     | PIGK     |          |
| MATR3     | PIGX     |          |
| MCFD2     | PITPNC1  |          |
| MCM4      | PLS3     |          |
| MDFIC     | POLR2B   |          |
| MDM2      | POMK     |          |
| ME1       | PPP1CB   |          |
| MED1      | PPP1CC   |          |
| MED13     | PPP1R12A |          |
| MED13L    | PPP2R2A  |          |
| MEIS2     | PPP2R5E  |          |
| MET       | PPP6R3   |          |
| METTL9    | PRICKLE1 |          |
| MINPP1    | PRKAA1   |          |
| MKLN1     | PRNP     |          |
| MMADHC    | PRRC2C   |          |
| MMD       | PSD3     |          |
| MOB1A     | PSMA4    |          |
| MOB1B     | PSMD1    |          |
| MRGPRF    | PSME4    |          |
| MRPS6     | PTBP1    |          |
| MTMR6     | PTP4A1   |          |
| MTRR      | PTP4A2   |          |
| MYO1B     | PTPN14   |          |
| MYO5A     | PTPRK    |          |
| NAA50     | PUM1     |          |
| NABP1     | PUM2     |          |
| NAE1      | PVRL3    |          |
| NAMPT     | PXK      |          |
| NARS      | PXN      |          |
| NCKAP1    | PYGL     |          |
| NCL       | QKI      |          |
| NCOA4     | RAB14    |          |
| NF1       | RAB1A    |          |

NFAT5  
NMT2  
NNT  
NPEPPS  
NPTN  
NPTX1  
NR1D2  
NR3C1  
NREP  
NRP1  
NSF  
NSMAF  
NT5C2  
NT5E  
NTNG1  
NUCKS1  
NUFIP2  
NUP98  
NUSAP1  
NXF1  
PABPN1  
PANK3  
PAPOLA  
PATL1  
PAXBP1  
PBX3  
PCMTD1  
PCNX  
PCYOX1  
PDCC6IP  
PDS5A  
PGM3  
PGRMC1  
PHLDA1  
PIGK  
PIGX  
PITPNB  
PITPNC1  
PKN2  
PLS3  
POLR2B  
POMK  
PPP1CB  
PPP1CC  
PPP1R12A  
PPP2R2A  
PPP2R5E  
PPP3CA  
PPP6C  
PPP6R3  
PREPL  
PRICKLE1  
PRKAA1  
PRKAR1A  
PRKCA  
PRNP  
PRR14L  
PRRC2C  
PSD3  
PSMA4  
PSMD1  
PSME4

PSD3  
PSMA4  
PSMD1  
PSME4  
PTBP1  
PTBP3  
PTP4A1  
PTPN14  
PTPRK  
PUM2  
PVRL3  
PXK  
PXN  
RAB10  
RAB21  
RAB3B  
RAB7A  
RAB8B  
RAC1  
RAP2A  
RAP2B  
RASA1  
RASSF8  
RBMS1  
RCN1  
RCN2  
REEP3  
REV3L  
RFX7  
RGMB  
RNF11  
RNF130  
RNF146  
ROBO1  
RPF2  
RPS27L  
RRAGC  
RRM1  
RSPRY1  
RTN4  
RUNX1  
RYK  
S100A10  
SAMD8  
SAR1A  
SBF2  
SC5D  
SCAF8  
SCARB2  
SCCPDH  
SDC4  
SDCCAG3  
SEC23A  
SEC62  
SEC63  
SEMA3C  
SEMA5A  
SEMA6D  
SEPT10  
SEPT7  
SERINC1  
SERTAD2

UCHL3  
UFD1L  
UGDH  
UGP2  
USP34  
USP53  
VEZF1  
VPS35  
WLS  
YAP1  
YTHDF1  
ZBTB2  
ZC3H11A  
ZC3H7A  
ZDHHC2  
ZFP36L2  
ZFR  
ZMIZ1  
ZMPSTE24  
ZMYM4  
ZNF655  
ZSCAN20

NFAT5  
NMT2  
NNT  
NPEPPS  
NPTN  
NPTX1  
NR1D2  
NR3C1  
NREP  
NRP1  
NSF  
NSMAF  
NT5C2  
NT5E  
NTNG1  
NUCKS1  
NUFIP2  
NUP98  
NUSAP1  
NXF1  
PABPN1  
PANK3  
PAPOLA  
PATL1  
PAXBP1  
PBX3  
PCMTD1  
PCNX  
PCYOX1  
PDCC6IP  
PDS5A  
PGM3  
PGRMC1  
PHLDA1  
PIGK  
PIGX  
PITPNB  
PITPNC1  
PKN2  
PLS3  
POLR2B  
POMK  
PPP1CB  
PPP1CC  
PPP1R12A  
PPP2R2A  
PPP2R5E  
PPP3CA  
PPP6C  
PPP6R3  
PREPL  
PRICKLE1  
PRKAA1  
PRKAR1A  
PRKCA  
PRNP  
PRR14L  
PRRC2C  
PSD3  
PSMA4  
PSMD1  
PSME4

RAB21  
RAB23  
RAB2A  
RAB3B  
RAB5A  
RAB8B  
RAC1  
RALGPS2  
RANBP9  
RAP2A  
RB1  
RBFOX2  
RBMS1  
RCN2  
REEP3  
RFX7  
RGL1  
RNF146  
RPF2  
RPS24  
RRAGC  
RSPRY1  
RUNX1  
RYK  
S100A10  
SAMD8  
SAP30  
SAR1A  
SBF2  
SC5D  
SCAF8  
SCCPDH  
SDAD1  
SDC4  
SDCBP  
SEC23A  
SEC24D  
SEC62  
SECTM1  
SEPT11  
SEPT7  
SERBP1  
SERPINE2  
SERTAD2  
SET  
SETD5  
SF3B14  
SFPQ  
SFT2D1  
SFXN1  
SGCB  
SGMS2  
SHOC2  
SKA2  
SLAIN2  
SLC17A5  
SLC20A1  
SLC25A33  
SLC25A40  
SLC25A46  
SLC30A7  
SLC35F5



PTBP1  
PTP4A1  
PTP4A2  
PTPN14  
PTPRK  
PUM1  
PUM2  
PVRL3  
PXK  
PXN  
PYGL  
QKI  
RAB14  
RAB1A  
RAB21  
RAB23  
RAB2A  
RAB3B  
RAB3GAP2  
RAB5A  
RAB7A  
RAB8B  
RAC1  
RALGPS2  
RANBP9  
RAP2A  
RARS  
RASSF8  
RB1  
RBFOX2  
RBMS1  
RCN2  
REEP3  
REV3L  
RFX7  
RGL1  
RNF130  
RNF146  
ROBO1  
RPF2  
RPS24  
RRAGC  
RSPRY1  
RTN4  
RUNX1  
RYK  
S100A10  
SAMD8  
SAP30  
SAR1A  
SBF2  
SC5D  
SCAF8  
SCAMP1  
SCCPDH  
SDAD1  
SDC4  
SDCBP  
SEC23A  
SEC24D  
SEC62  
SEC63

SET  
SETD5  
SFPQ  
SFT2D1  
SFT2D2  
SFXN1  
SGCB  
SGCE  
SHOC2  
SKAP2  
SLC16A6  
SLC17A5  
SLC20A1  
SLC25A32  
SLC25A46  
SLC30A5  
SLC35A5  
SLC35F5  
SLC5A3  
SLC9A1  
SLC9A6  
SLC9A7  
SLFN5  
SMAD2  
SMAD3  
SMAD4  
SMARCA1  
SMNDC1  
SNAPC3  
SNX6  
SOCS5  
SOCS6  
SPATS2L  
SPIN1  
SPRED1  
SPSB1  
SRPK1  
SS18  
SSFA2  
SSR1  
STAM2  
STARD3NL  
STK17A  
STK38  
STMN1  
STOM  
STX2  
STYX  
SUB1  
SUCLG2  
SUPT16H  
SUPT20H  
SUZ12  
SUZ12P1  
SYPL1  
TAB2  
TACC1  
TAF9  
TAOK1  
TBL1XR1  
TCEB3  
TCF12

PTBP1  
PTP4A1  
PTP4A2  
PTPN14  
PTPRK  
PUM1  
PUM2  
PVRL3  
PXK  
PXN  
PYGL  
QKI  
RAB14  
RAB1A  
RAB21  
RAB23  
RAB2A  
RAB3B  
RAB3GAP2  
RAB5A  
RAB7A  
RAB8B  
RAC1  
RALGPS2  
RANBP9  
RAP2A  
RARS  
RASSF8  
RB1  
RBFOX2  
RBMS1  
RCN2  
REEP3  
REV3L  
RFX7  
RGL1  
RNF130  
RNF146  
ROBO1  
RPF2  
RPS24  
RRAGC  
RSPRY1  
RTN4  
RUNX1  
RYK  
S100A10  
SAMD8  
SAP30  
SAR1A  
SBF2  
SC5D  
SCAF8  
SCAMP1  
SCCPDH  
SDAD1  
SDC4  
SDCBP  
SEC23A  
SEC24D  
SEC62  
SEC63

SLC38A2  
SLC39A6  
SLC5A3  
SLIT2  
SMAD2  
SMAD3  
SMARCA1  
SMNDC1  
SMURF2  
SNX6  
SOAT1  
SOCS5  
SOCS6  
SPATS2L  
SPDL1  
SPIN1  
SPPL2A  
SPSB1  
SRPK1  
SRSF2  
SRSF3  
SRSF5  
SS18  
SSFA2  
STAT1  
STEAP1B  
STK17A  
STMN1  
STX2  
SUB1  
SUZ12P1  
SYT11  
TAB2  
TAF9  
TAOK1  
TBL1XR1  
TCEB3  
TCF12  
TCP1  
TEAD1  
TERF1  
TFDP1  
TFG  
TFRC  
TIPARP  
TM9SF2  
TMED2  
TMEM106B  
TMEM165  
TMEM209  
TMEM248  
TMEM33  
TMPO  
TMTC1  
TMX3  
TNFAIP3  
TNPO1  
TNRC6A  
TOB1  
TPP2  
TPT1  
TRAK2

SECTM1  
SEPT10  
SEPT11  
SEPT7  
SERBP1  
SERINC1  
SERPINE2  
SERTAD2  
SET  
SETD5  
SF3B14  
SFPQ  
SFT2D1  
SFT2D2  
SFXN1  
SGCB  
SGCE  
SGMS2  
SH3BGRL  
SHOC2  
SKA2  
SKAP2  
SLAIN2  
SLC17A5  
SLC20A1  
SLC25A33  
SLC25A40  
SLC25A46  
SLC30A1  
SLC30A5  
SLC30A7  
SLC35F5  
SLC38A2  
SLC39A6  
SLC44A1  
SLC5A3  
SLC9A6  
SLC9A7  
SLFN5  
SLIT2  
SMAD2  
SMAD3  
SMAD4  
SMAD5  
SMARCA1  
SMNDC1  
SMURF2  
SNX3  
SNX6  
SOAT1  
SOCS5  
SOCS6  
SPATS2L  
SPDL1  
SPIN1  
SPPL2A  
SPRED1  
SPRY2  
SPSB1  
SRGAP1  
SRPK1  
SRSF2

TCP1  
TEAD1  
TFDP1  
TFRC  
TGFBR3  
TIMP2  
TIPARP  
TIPRL  
TM9SF2  
TMED5  
TMED7  
TMEM123  
TMEM14B  
TMEM165  
TMEM19  
TMEM243  
TMEM248  
TMEM260  
TMEM30A  
TMEM55A  
TMEM87B  
TMEM9B  
TMX3  
TNFAIP3  
TNFRSF11B  
TNPO1  
TNRC6A  
TOB1  
TPBG  
TPP2  
TRIP12  
TRPS1  
TSPAN5  
TTPAL  
TUBB4A  
TUSC3  
TWIST1  
TXNL1  
UBE2D1  
UBE2R2  
UBE3C  
UBXN7  
UCHL3  
UFD1L  
UGCG  
UGDH  
UGP2  
USP14  
USP34  
USP53  
VEZF1  
VHL  
VPS35  
WBP11  
WDR82  
WLS  
WNK1  
WSB1  
YAP1  
YTHDC1  
YTHDF1  
ZBED5

SECTM1  
SEPT10  
SEPT11  
SEPT7  
SERBP1  
SERINC1  
SERPINE2  
SERTAD2  
SET  
SETD5  
SF3B14  
SFPQ  
SFT2D1  
SFT2D2  
SFXN1  
SGCB  
SGCE  
SGMS2  
SH3BGRL  
SHOC2  
SKA2  
SKAP2  
SLAIN2  
SLC17A5  
SLC20A1  
SLC25A33  
SLC25A40  
SLC25A46  
SLC30A1  
SLC30A5  
SLC30A7  
SLC35F5  
SLC38A2  
SLC39A6  
SLC44A1  
SLC5A3  
SLC9A6  
SLC9A7  
SLFN5  
SLIT2  
SMAD2  
SMAD3  
SMAD4  
SMAD5  
SMARCA1  
SMNDC1  
SMURF2  
SNX3  
SNX6  
SOAT1  
SOCS5  
SOCS6  
SPATS2L  
SPDL1  
SPIN1  
SPPL2A  
SPRED1  
SPRY2  
SPSB1  
SRGAP1  
SRPK1  
SRSF2

TRAM1  
TRIP12  
TRPM7  
TRPS1  
TUBB4A  
TUSC3  
TYMS  
UBE2D1  
UBE2R2  
UBE3C  
UBQLN1  
UBXN7  
UCHL3  
UFD1L  
UGCG  
UGDH  
USO1  
USP14  
USP34  
USP9X  
VAPA  
VEZF1  
VPS35  
WAC  
WDR26  
WRB  
WSB1  
XPO1  
XRCC5  
YAP1  
YTHDC1  
YTHDF1  
ZBTB2  
ZC3H11A  
ZC3H7A  
ZC3HAV1  
ZC3HAV1L  
ZFAND5  
ZFR  
ZMIZ1  
ZMYM4  
ZNF148  
ZNF706  
ZSCAN20

SRSF3  
SRSF5  
SS18  
SSFA2  
STAT1  
STEAP1B  
STK17A  
STK38  
STMN1  
STOM  
STT3B  
STX2  
SUB1  
SUMO2  
SUPT16H  
SUZ12P1  
SYPL1  
SYT11  
TAB2  
TAF9  
TAOK1  
TBL1XR1  
TCEB3  
TCF12  
TCP1  
TEAD1  
TERF1  
TFDP1  
TFG  
TFRC  
TGFBR3  
TIMP2  
TIPARP  
TM9SF2  
TM9SF3  
TMED2  
TMEM106B  
TMEM165  
TMEM209  
TMEM248  
TMEM260  
TMEM33  
TMEM50B  
TMEM9B  
TMPO  
TMTC1  
TMX3  
TNFAIP3  
TNPO1  
TNRC6A  
TOB1  
TOP1  
TPBG  
TPP2  
TPT1  
TRA2A  
TRAK2  
TRAM1  
TRIP12  
TRPM7  
TRPS1  
TUBB4A

ZBTB2  
ZC3H11A  
ZC3H7A  
ZDHHC2  
ZFAND5  
ZFP36L2  
ZFR  
ZMIZ1  
ZMPSTE24  
ZMYM4  
ZNF148  
ZNF521  
ZNF655  
ZSCAN20  
ZYG11B

SRSF3  
SRSF5  
SS18  
SSFA2  
STAT1  
STEAP1B  
STK17A  
STK38  
STMN1  
STOM  
STT3B  
STX2  
SUB1  
SUMO2  
SUPT16H  
SUZ12P1  
SYPL1  
SYT11  
TAB2  
TAF9  
TAOK1  
TBL1XR1  
TCEB3  
TCF12  
TCP1  
TEAD1  
TERF1  
TFDP1  
TFG  
TFRC  
TGFBR3  
TIMP2  
TIPARP  
TM9SF2  
TM9SF3  
TMED2  
TMEM106B  
TMEM165  
TMEM209  
TMEM248  
TMEM260  
TMEM33  
TMEM50B  
TMEM9B  
TMPO  
TMTC1  
TMX3  
TNFAIP3  
TNPO1  
TNRC6A  
TOB1  
TOP1  
TPBG  
TPP2  
TPT1  
TRA2A  
TRAK2  
TRAM1  
TRIP12  
TRPM7  
TRPS1  
TUBB4A





|          |           |           |          |          |            |          |          |           |          |          |            |          |           |            |         |          |          |
|----------|-----------|-----------|----------|----------|------------|----------|----------|-----------|----------|----------|------------|----------|-----------|------------|---------|----------|----------|
| DTNA     | GLI3      | IGF2      | DRAM1    | HSPB11   | HAUS8      | ERO1L    | KCNIP3   | ITGA6     | CXCL12   | GIN52    | LBR        | DTNA     | FAM89B    | LMBRD1     | CHAF1A  | DMPK     | NID1     |
| DUSP6    | GPR137B   | IGF2R     | E2F1     | IGFBP6   | HOMER3     | ETFB     | KCNQ5    | ITGA6     | CYR61    | GIN54    | LCLAT1     | DUSP6    | FBXO3     | LPPR2      | CHN1    | DNMT1    | NREP     |
| DYNC112  | GRB10     | IGFBP3    | ELN      | ITGA4    | HOXC11     | ETV1     | KCTD21   | JAM2      | DAPK2    | GLIPR2   | LMBN1      | DYNC112  | FIBCD1    | LTBP1      | CHST3   | DOCK2    | NSF      |
| DYNLT3   | GSTO1     | IMPACT    | ENAH     | KANK2    | HRH1       | ETV4     | KDM3A    | KCNC4     | DBF4B    | GSTM4    | LMOD1      | DYNLT3   | FKBP1A    | MAN2A1     | CIT     | DRAM1    | NUDCD2   |
| E2F7     | HCN2      | INA       | ENO2     | KCND1    | IGFBP6     | EVISL    | KIAA1217 | KCNJ15    | DDX21    | GSTM5    | LOXL1      | E2F7     | FLI1      | MAPRE3     | CKS2    | DUT      | NXNL2    |
| EIF1AX   | HEY1      | ISCU      | EPS8     | KHK      | JADE1      | F2R      | KIAA1551 | KCNMA1    | DDX39A   | GTF2H1   | LY6G5B     | EIF1AX   | FNDC4     | MTTL9      | CNN1    | E2F1     | ORC6     |
| EIF2AK3  | HGF       | ITGA11    | EZR      | KIAA0226 | KIAA1199   | FAM105A  | LCE2A    | KCNQ5     | DHRS11   | GTSE1    | MB21D2     | EIF2AK3  | FRMD3     | MICB       | CNOT6   | ENAH     | PAC5IN2  |
| EIF3J    | HIST1H4H  | ITGA2     | FADS2    | KIAA1199 | KIF13A     | FAM150B  | LGALS3   | KDSR      | DMPK     | HADH     | MCM7       | EIF3J    | FYN       | MTSS1      | COL12A1 | EPS8     | PAQR4    |
| EIF4EBP2 | HIVEP2    | ITPR2     | FAM27L   | KIF22    | KPNA2      | FAM171A2 | LMNL     | KIAA1217  | DNMT1    | HAUS4    | MIF4GD     | EIF4EBP2 | GATSL3    | NEK9       | CREB3L1 | ER12     | PGM2     |
| EML1     | HMG2A     | KCNC4     | FAM65B   | KRT19    | KRT34      | FAM171B  | LPAR3    | KLHDC3    | DOCK2    | HDAC1    | MRV11      | EML1     | GCOM1     | NETO2      | SGPG4   | ESPL1    | PHF19    |
| EPHA5    | HOXA7     | KCNMA1    | FAM83D   | KRT7     | KRT7       | FAM210B  | LPHN2    | KLHL21    | DONSON   | HIST1H4L | MYBL2      | EPHA5    | GDPD1     | NOX4       | CTSH    | EXT2     | PKMYT1   |
| EPT1     | IGF2R     | KCNN2     | FANCA    | LBR      | LIG1       | FAM89B   | LTBP1    | LAMA1     | DRAM1    | HJURP    | NACC1      | EPT1     | GLRX      | NT5E       | CYR61   | FAM64A   | PLK2     |
| EREG     | IL1RN     | KIAA0319L | FANCC    | LMCD1    | LMCD1      | FBXO3    | LYPLA1   | LMBRD1    | ELN      | HLA-DMA  | NAT14      | EREG     | GPR137B   | PARD6G     | DAPK2   | FANCA    | PLTP     |
| ETFB     | ITGA2     | KLHDC3    | FANCE    | LOXL3    | LOXL1      | FEZ1     | M6PR     | LPAR3     | ENO2     | HMG2B    | NAV2       | ETFB     | GRB10     | PBX2       | DAZAP2  | FANCC    | PODN     |
| ETV4     | ITGA6     | KLHL21    | FBN1     | MCM2     | MCM2       | FIBCD1   | MAN2A1   | LPPR2     | ERI2     | HOMER3   | NREP       | ETV4     | GSTO1     | PITPNC1    | DBF4B   | FBN1     | POLA2    |
| EVISL    | ITGA8     | KLHL24    | FBN2     | METTL7A  | MCM4       | FKBP1A   | MAPRE3   | LTBP1     | ESPL1    | HPRT1    | NT5DC3     | EVISL    | GTF2B     | PLEKHM1    | DDX21   | FBN2     | PPME1    |
| F2R      | JARID2    | LAMA1     | FEN1     | MIF4GD   | MCM7       | FLI1     | MCTP1    | LYPLA1    | EZR      | HSPA2    | NTN4       | F2R      | HCN2      | PNPLA4     | DDX39A  | FEN1     | PTRF     |
| F2RL1    | KCNIP3    | LGALS3    | FHL3     | MTHFS    | MCMBP      | FNDC4    | MICB     | M6PR      | F11R     | HSPB11   | NYNRIN     | F2RL1    | HIPK2     | PODXL      | DHRS11  | FHL3     | PXMP2    |
| FAM105A  | KCNMA1    | LONRF1    | FLNB     | MTMR12   | MTHFS      | FOXP2    | MME      | MAP3K7CL  | FADS2    | IGFBP6   | OLFML2B    | FAM105A  | HMG2A     | POPDC3     | DHRS3   | FLNB     | RDH10    |
| FAM150B  | KCNQ5     | LPPR2     | FLNC     | MYH10    | MTRF1L     | GAP43    | MMP16    | MAPRE3    | FAM65B   | INCENP   | ORC6       | FAM150B  | HNRNP2    | PPAP2B     | DMPK    | FLNC     | SAMD12   |
| FAM171A2 | KIAA0319L | LTBP1     | FMOD     | NACC1    | MXD3       | GCOM1    | MTURN    | MCTP1     | FANCA    | IQGAP3   | PACSIN2    | FAM171A2 | HOXA7     | PPAP2C     | DNMT1   | FMOD     | SAP30    |
| FAM171B  | KIT       | M6PR      | FN3KRP   | NCAPD3   | MYBL2      | GFPT2    | MYC      | MSC       | FBN1     | ITGA4    | PHF19      | FAM171B  | HSPB6     | PSTPIP2    | DOCK2   | FN3KRP   | SCCPDH   |
| FAM210B  | KLHL21    | MAGEH1    | FOSL2    | NDE1     | MYOCD      | GM2A     | NCALD    | MTURN     | FEN1     | KANK2    | PIM1       | FAM210B  | IF16      | PTGS1      | DRAM1   | FOXM1    | SELENBP1 |
| FAM89B   | LAMA1     | MAGI2     | FOXM1    | NEU1     | NAT14      | GPR137B  | NEDD4    | NF2       | FGD4     | KHK      | PKMYT1     | FAM89B   | IGF2      | QKI        | DUT     | GAB2     | SHCBP1   |
| FBXO3    | LONRF1    | MDM2      | FOXRED1  | NGF      | NDE1       | GRB10    | NEK9     | NFIL3     | FHL3     | KIAA0226 | PLTP       | FBXO3    | IGFBP3    | QPCT       | GK1     | GIN52    | SLBP     |
| FIBCD1   | LPAR3     | METTL9    | FZD2     | NID1     | NID1       | GSTO1    | NEO1     | NUDT11    | FLNC     | KIF22    | PRC1       | FIBCD1   | INA       | RAB31      | ELN     | GIN54    | SLC4A8   |
| FKBP1A   | LYPLA1    | MRPL5C    | GAB2     | NPM3     | NT5DC3     | GTF2B    | NETO2    | OGFRL1    | FN3KRP   | KIF4A    | PRR23C     | FKBP1A   | ITGA2     | REXO1      | ENAH    | GLCE     | SMAD3    |
| FL1      | MAN2A1    | MSC       | GALNT4   | NRAS     | NYNRIN     | HCN2     | NF2      | P2RX5     | FOSL2    | KPNA2    | PRSS12     | FL1      | ITPR2     | RGS2       | ENO2    | GLIPR2   | SNRPA    |
| FNDC4    | MARVELD1  | MTURN     | GIN52    | NREP     | OLFML2B    | HEY1     | NKIRAS2  | PARD6G    | FOXM1    | KRT18    | RARG       | FNDC4    | IVL       | RIN3       | EPS8    | GPR124   | SORT1    |
| FRMD3    | MFSD1     | MX1       | GLIPR2   | NSUN2    | PCNA       | HIPK2    | NPC1     | PARM1     | FOXRED1  | LMNB1    | RDH10      | FRMD3    | KCNC4     | RORA       | ER12    | GPRC5A   | SPA17    |
| FSCN1    | MICB      | MYC       | GPR124   | NT5DC3   | PEG10      | HMG2A    | NTSR1    | PIP5K1C   | FRY      | LOXL3    | RPL39L     | FSCN1    | KCNIP3    | RRAGD      | ESPL1   | GPRC5B   | SRM2     |
| FYN      | MME       | MYO1D     | GPR126   | NTN4     | PIM1       | HNRNP2   | NUPR1    | PITPNC1   | FSTL5    | LY6G5B   | RRM2       | FYN      | KCNN2     | SCN1B      | EXT2    | GSTM4    | STMN1    |
| GATSL3   | MX1       | NDN       | GPRC5B   | NUAK2    | POC1A      | HSD17B10 | OCM2     | PLEKHM1   | FZD2     | MB21D2   | SAMD12     | GATSL3   | KCTD21    | SEMA6A     | FAM64A  | GSTM5    | SUMO2    |
| GCOM1    | NAP1L5    | NEDD4     | GSG2     | NUMA1    | POLE       | IARS     | OSBPL1A  | PODXL     | GAB2     | MCM2     | SCCPDH     | GCOM1    | KDM3A     | SEPT5      | FANCA   | GTF2H1   | SUZ12P1  |
| GDPD1    | NCALD     | NEK9      | GSTM5    | NXNL2    | PRC1       | IGF2     | PARD6G   | PPARG     | GIN52    | MCM5     | SCML1      | GDPD1    | KIAA0319L | SEPW1      | FANCC   | GTSE1    | SYPL2    |
| GLRX     | NETO2     | NEO1      | H2AFZ    | NYNRIN   | PTK7       | IGF2R    | PBX2     | PPM1L     | GIN54    | MDC1     | SDC1       | GLRX     | KIAA1551  | SERINC1    | FBN1    | HAUS4    | TACC3    |
| GPR137B  | NF2       | NETO2     | HAUS8    | PCNA     | PTRF       | IMPACT   | PDIAS    | PRSS35    | GLIPR2   | MIF4GD   | SELENBP1   | GPR137B  | KIT       | SESN2      | FBN2    | HDAC1    | TGOLN2   |
| GRB10    | NFIL3     | NFIL3     | HDAC1    | PDE1C    | RAD54L     | ISCU     | PDP2     | PTPRG     | GS2      | MTRF2    | SFPQ       | GRB10    | KLHDC3    | FRP1       | FEN1    | HIPK1    | TK1      |
| GSTO1    | NINJ1     | NUDT11    | HIAT1    | PHF19    | RARG       | ITFG1    | PIP5K1C  | RAB31     | GSTM4    | MTHFS    | SH2D4A     | GSTO1    | KLHL21    | SH3PX2D2B  | FHL3    | HJURP    | TMEM204  |
| GTF2B    | NKIRAS2   | PAG1      | HOMER3   | PKMYT1   | RBBP7      | ITGA6    | PITPNC1  | RGS2      | GSTM5    | MTMR12   | SLC1A5     | GTF2B    | LAMA4     | SLC16A2    | FLNB    | HMGB2    | TMEM97   |
| HCN2     | NOG       | PARD6G    | HOXC11   | PRSS12   | RNF22      | ITGA8    | PNPLA4   | RIN3      | GTF2H1   | MXD3     | SLC4A8     | HCN2     | LCE2A     | SLC16A3    | FLNC    | HOMER3   | TOMM34   |
| HGF      | NPC1      | PBX2      | HRP1     | PTK7     | SAMD12     | IVL      | POPDC3   | RRAGD     | GTSE1    | MYH10    | SMAD3      | HGF      | LIMS1     | SLC25A33   | FMOD    | HOXC11   | TPD52L1  |
| HIPK2    | NRIP3     | PDP2      | HRH1     | PTPRJ    | SCARA3     | JAM2     | PPAP2C   | SCN1B     | GADH     | NACC1    | SSRP1      | HIPK2    | LMBRD1    | SLC25A51   | FN3KRP  | HPRT1    | TRIP13   |
| HMG2A    | NTSR1     | PIP5K1C   | HSPB11   | PTRF     | SCML1      | KCNC4    | PPARG    | SEMA5A    | HAUS4    | NAT14    | ST3GAL4    | HMG2A    | LMLN      | SLC26A2    | FOSL2   | HRH1     | UCP2     |
| HNRNP2   | OSBPL1A   | PLAGL1    | IGFBP6   | PXMP2    | SDC1       | KCNIP3   | PRKG2    | SEMA6A    | HDAC1    | NCAPH    | STMN1      | HNRNP2   | LONRF1    | SLC35F3    | FOXM1   | HSPB11   | UHK1     |
| HOXA7    | P4HA1     | PLEKHM1   | ITGA4    | RARG     | SEC61A2    | KCNJ15   | PSD3     | SEMA6D    | HIAT1    | NDC1     | STXBP5     | HOXA7    | LPAR3     | SLC37A2    | GAB2    | IGFBP6   | VANGL1   |
| HSPB6    | PAPPA     | PMAIP1    | JADE1    | RDH10    | SEMA3B     | KCNMA1   | PTGFRN   | SEPT5     | HIST1H4L | NDE1     | TACC3      | HSPB6    | LPHN2     | SLC37A3    | GIN52   | INTS9    | WDR62    |
| IF16     | PARD6G    | PODXL     | KANK2    | RHPN2    | SH3BP4     | KCNQ5    | PTGS1    | SEPW1     | HJURP    | NEK2     | TAGLN      | IF16     | LPPR2     | SLC39A13   | GIN54   | IQGAP3   | WEE1     |
| IGF2     | PARM1     | POPDC3    | KCND1    | RPL39L   | SHMT1      | KCTD21   | PTPRU    | SERINC1   | HLA-DMA  | NEU1     | TGFB1      | IGF2     | LTBP1     | SLFV5      | GLCE    | ISLR     | ZDHHC12  |
| IGFBP3   | PHLDA1    | PPAP2C    | KHK      | RRM2     | SLBP       | KDM3A    | PXK      | SESN2     | HMG2B    | NGF      | TK1        | IGFBP3   | LURAP1L   | SNX6       | GLIPR2  | JADE1    |          |
| INA      | PMAIP1    | PPARG     | KIAA0226 | S100A16  | SLC1A5     | KDSR     | QPCT     | SFRP1     | HOMER3   | NID1     | TNFAP8L1   | INA      | LYPLA1    | SPRY2      | GPR124  | JUP      |          |
| ISCU     | PODXL     | PPP1R3C   | KIAA1199 | SAP30    | SLC4A8     | KIAA1217 | RAB27B   | SH3GL2    | HOXA11   | NOL9     | TOE1       | ISCU     | MAGI2     | ST6GALNAC2 | GPR126  | KANK2    |          |
| ITFG1    | PPM1L     | PRKG2     | KIF13A   | SCARA3   | SAMD3      | KIAA1551 | RAP1GAP2 | SH3PX2D2B | HPRT1    | NPM3     | RIM6-TRIM3 | ITFG1    | MAML3     | STEAP3     | GPRC5A  | KIAA0226 |          |
| ITGA2    | PRKG1     | PRSS35    | KIF22    | SDC4     | SOGA1      | KLHDC3   | RBMS1    | SIRPA     | HSPA2    | NSF      | UCP2       | ITGA2    | MAN2A1    | STXBP1     | GPRC5B  | KIAA1598 |          |
| ITGA6    | PSD3      | PSD3      | KPNA2    | SEC61A2  | ST3GAL4    | KLHL21   | REXO1    | SLC16A3   | HSPB11   | NSF      | VANGL1     | ITGA6    | MAPRE3    | SULF2      | GSTM4   | KIF23    |          |
| ITGA8    | PSTPIP2   | PSKH1     | KRT19    | SEPT6    | 5P-PVRIG2F | LAMA1    | RIN3     | SLC37A3   | ICAM2    | NT5DC3   | ZDHHC12    | ITGA8    | MCTP1     | TBC1D17    | GSTM5   | KPNA2    |          |
| ITPR2    | PTGFRN    | QKI       | KRT34    | SERTAD4  | SUZ12P1    | LCE2A    | RPS6KA3  | SLC38A1   | IER3     | NXNL2    |            | ITPR2    | MDM2      | TBCCD1     | GTF2H1  | KRT18    |          |
| IVL      | PTGS1     | RBMS1     | KRT7     | SHCBP1   | SYPL2      | LGALS3   | RRAGD    | SLC39A13  | IGFBP6   | NXP2     |            | IVL      | METTL9    | TK2        | GTSE1   | KRT19    |          |
| KCNC4    | PTGS2     | REXO1     | LBR      | SKP2     | TAGLN      | LMBRD1   | RRM2B    | SLC5A3    | INCENP   | NYNRIN   |            | KCNC4    | MICB      | TLE3       | HADH    | LBR      |          |
| KCNIP3   | PTPRU     | RIN3      | LIG1     | SLC38A11 | TAGLN2     | LMLN     | RTN4RL1  | SLC6A15   | IQGAP3   | ORC6     |            | KCNIP3   | MSC       | TMED4      | HAUS4   | LMBN2    |          |
| KCNJ15   | QKI       | RIPK2     | LMCD1    | SLC43A3  | TGFB1      | LPAR3    | SATB1    | SLFN5     | ITGA4    | PGM2     |            | KCNJ15   | MTSS1     | TMEM117    | HDAC1   | LMOD1    |          |
| KCNMA1   | QPCT      | RNF24     | LOXL1    | SLC7A5   | TGM2       | LPHN2    | SC5D     | SNX6      | JADE1    | PKMYT1   |            | KCNMA1   | MTURN     | TOX2       | HIAT1   | LOXL3    |          |

|           |          |          |         |         |             |          |          |            |          |          |           |          |          |          |          |
|-----------|----------|----------|---------|---------|-------------|----------|----------|------------|----------|----------|-----------|----------|----------|----------|----------|
| KCNN2     | RAB31    | SATB1    | LOXL3   | SMAD3   | TK1         | LPPR2    | SCN1B    | SRXN1      | JUP      | POC1A    | KCNN2     | MYO1D    | TPRG1L   | HIPK1    | LY6G5B   |
| KCTD21    | RAB33A   | SATB2    | MCM2    | SNRPA   | TRIM6-TRIM3 | LTBP1    | SEPT3    | ST6GALNAC2 | KANK2    | PODN     | KCTD21    | NCALD    | TRAPPC6B | HJURP    | MCM2     |
| KDM3A     | RAP1GAP2 | SCN1B    | MCM4    | SOGA1   | UCP2        | LYPLA1   | SEPW1    | STEAP3     | KCND1    | PRC1     | KDM3A     | NEDD4    | TSHZ3    | HMG2     | MCM4     |
| KDSR      | RASGRF2  | SECTM1   | MCM7    | SORT1   | UHMK1       | M6PR     | SET      | STMN3      | KHK      | PSMA5    | KDSR      | NEO1     | TUBA3E   | HOMER3   | MCM5     |
| KIAA0319L | RGL1     | SEMA5A   | MCMBP   | SPA17   | VAMP5       | MAN2A1   | SLC16A2  | STXBP1     | KIAA0226 | PSMB9    | KIAA0319L | NETO2    | USF2     | HOXA11   | MCM7     |
| KIAA1551  | RNF24    | SEMA6D   | METTL7A | SPAG5   | XRCC6BP1    | MAP3K7CL | SLC16A6  | TIPARP     | KIAA1598 | PSMC3IP  | KIAA1551  | NFIL3    | UXS1     | HOXC11   | MCMBP    |
| KIT       | RPS6KA3  | SEPT5    | MIF4GD  | ST3GAL4 | ZBTB5       | MAPRE3   | SLC17A5  | TMED4      | KIF22    | PSRC1    | KIT       | NINJ1    | ZC3HAV1L | HPRT1    | MDC1     |
| KLHDC3    | SEMA5A   | SEPW1    | MTHFS   | STMN1   | ZC3H12A     | MCTP1    | SLC25A32 | TMEM158    | KIF4A    | PTK7     | KLHDC3    | NPC1     | ZNF521   | HRH1     | MIF4GD   |
| KLHL21    | SEPT3    | SETBP1   | MTMR12  | SUV39H1 | ZDHHC12     | MICB     | SLC25A51 | TOB1       | KPNA2    | PTPRJ    | KLHL21    | NTM      | ZNF610   | HSPB11   | MTMR12   |
| LAMA1     | SEPT5    | SIRPA    | SYNPO   | MME     |             | MMP16    | SLC2A3   | TOX2       | KRT18    | PTTG11P  | LAMA1     | OCM2     |          | IER3     | MXD3     |
| LAMA4     | SEPW1    | SLC17A5  | MXD3    | TACC3   |             | MSC      | SLC35A1  | TSHZ3      | KRT7     | PXMP2    | LAMA4     | P2RX5    |          | IGFBP6   | MYBL2    |
| LCE2A     | SET      | SLC25A33 | MYBL2   | TDP1    |             | TGFBI    | SLC37A2  | TSPAN11    | LBR      | RACGAP1  | LCE2A     | PAPPA    |          | INCENP   | MYH10    |
| LIMS1     | SETBP1   | SLC30A7  | MYH10   | TGFBI   |             | TM2      | SLC37A3  | TUBA3E     | LCLAT1   | RAD51    | LIMS1     | PCMTD1   |          | INTS9    | NACC1    |
| LMBRD1    | SH3PXD2B | SLC35F3  | MYOCD   | TGM2    |             |          | SLC38A1  | UBA6       | LMNB1    | RARG     | LMBRD1    | PDIA5    |          | IQGAP3   | NASP     |
| LMLN      | SLC16A2  | SLC38A1  | NACC1   | TMEM204 |             |          | NCALD    | USF2       | LMOD1    | RBBP7    | LMLN      | PDK3     |          | ISLR     | NAT14    |
| LONRF1    | SLC16A3  | SLC39A13 | NAT14   | UBP1    |             |          | NEDD4    | UST        | LOXL1    | RHPN2    | LONRF1    | PDP2     |          | JADE1    | NAV2     |
| LPAR3     | SLC16A6  | SLC4A4   | NCAPD3  | VANGL1  |             |          | NEK9     | SLMO2      | LOXL3    | RNASEH2A | LPAR3     | PHLDA1   |          | JUP      | NBPF3    |
| LPHN2     | SLC5A3   | SLC6A15  | NDE1    | WEE1    |             |          | NEO1     | SMPD1      | VLDLR    | LY6G5B   | LPHN2     | PIP5K1C  |          | KANK2    | NCAPD3   |
| LPPR2     | SLC6A15  | SMPD1    | NEU1    | ZDHHC12 |             |          | NETO2    | SNX6       | ZNF460   | MB21D2   | LPPR2     | PITPNC1  |          | KIAA0226 | NCAPH    |
| LTBP1     | SLMO2    | SMURF2   | NGF     |         |             |          | NF2      | SRXN1      | ZNF521   | MCM2     | LTBP1     | PMAIP1   |          | KIAA1598 | NDC1     |
| LURAP1L   | SMPD1    | SNCA     | NID1    |         |             |          | NFIL3    | SS18       | ZNF583   | MCM5     | LURAP1L   | PNPLA4   |          | NGF      |          |
| LYPLA1    | SOGA3    | SNX6     | NPM3    |         |             |          | NKIRAS2  | SSBP2      |          | MCM7     | LYPLA1    | PPAP2C   |          | KPNA2    | NID1     |
| MAGI2     | SSBP2    | SPRY2    | NRAS    |         |             |          | NPC1     | ST6GALNAC2 |          | MDC1     | MAGI2     | PPARG    |          | KRT18    | NPM3     |
| MAML3     | STC2     | SRXN1    | NREP    |         |             |          | NTSR1    | STEAP3     |          | MIF4GD   | MAML3     | PRKG2    |          | KRT19    | NSF      |
| MAN2A1    | STEAP3   | SS18     | NSUN2   |         |             |          | NUDT11   | ULF2       |          | SEC61A2  | MAN2A1    | PSD3     |          | KRT7     | NSUN2    |
| MAPRE3    | TBK1     | ST8SIA5  | NT5DC3  |         |             |          | NUPR1    | TAPBP      |          | SEMA3B   | MAPRE3    | PTGFR    |          | LBR      | NTN4     |
| MCTP1     | THBD     | STC2     | NTN4    |         |             |          | OCM2     | TCP11L2    |          | SEPT6    | MCTP1     | PTGFRN   |          | LMNB2    | NUMA1    |
| MDM2      | TMED4    | STMN3    | NUAK2   |         |             |          | OGFRL1   | TMCT7      |          | SERTAD4  | MDM2      | PTPRG    |          | LMOD1    | NUSAP1   |
| METTL9    | TMEM117  | STXBP1   | NUMA1   |         |             |          | OSBPL1A  | TMED4      |          | SH2D4A   | METTL9    | PXK      |          | LOXL1    | NXNL2    |
| MICB      | TMEM158  | TAPBP    | NXNL2   |         |             |          | P2RX5    | TMEM117    |          | SH3BP4   | MICB      | QKI      |          | LOXL3    | OIP5     |
| MSC       | TMEM192  | TBCCD1   | NYNRIN  |         |             |          | PARD6G   | TMOD2      |          | SHCBP1   | MSC       | RAB33A   |          | LY6G5B   | ORC6     |
| MTSS1     | TMOD2    | THBD     | OLFML2B |         |             |          | PARM1    | TOB1       |          | SHMT1    | MTSS1     | RAB3A    |          | LY6K     | OCTR     |
| MTURN     | TMTC1    | TLE3     | PCNA    |         |             |          | PBX2     | TOLLIP     |          | SLBP     | MTURN     | RAET1L   |          | MCM2     | PAQR4    |
| MYO1D     | TNC      | TMEM158  | PDE1C   |         |             |          | PDIA5    | TPRG1L     |          | SNMYD2   | MYO1D     | RAP1GAP2 |          | MCM4     | PDE1C    |
| NCALD     | TOB1     | TMOD2    | PEG10   |         |             |          | PDP2     | TRIB2      |          | SNAPIN   | NCALD     | RBMS1    |          | MCM5     | PGM2     |
| NEDD4     | TPRG1L   | TNFAIP1  | PHF19   |         |             |          | PIP5K1C  | TSPAN11    |          | SOGA1    | NEDD4     | RGL1     |          | MCM7     | PHF19    |
| NEK9      | TRIB2    | TSC22D3  | PIM1    |         |             |          | PITPNC1  | TUBA3E     |          | SORT1    | NEK9      | RIN3     |          | MCMBP    | PIM1     |
| NEO1      | TSC22D3  | TSHZ3    | PKMYT1  |         |             |          | PLEKHM1  | UBA6       |          | ST3GAL4  | NEO1      | RPL17    |          | MDC1     | PLK2     |
| NETO2     | TSPAN11  | TSPAN11  | POC1A   |         |             |          | PNPLA4   | ULBP3      |          | STMN1    | NETO2     | RPS6KA3  |          | MIF4GD   | POC1A    |
| NFIL3     | TXNIP    | UBA6     | POLE    |         |             |          | PODXL    | UST        |          | SUOX     | NFIL3     | RRAGD    |          | MSH5     | PODN     |
| NINJ1     | ULBP3    | UNC5B    | PRC1    |         |             |          | POPCD3   | VLDLR      |          | SUV39H1  | NINJ1     | RTN4RL1  |          | MTMR12   | POLE     |
| NOX4      | USF2     | VLDLR    | PRSS12  |         |             |          | PPAP2C   | VSTM4      |          | SUZ12P1  | NOX4      | SC5D     |          | PRC1     |          |
| NPC1      | VSTM4    | ZBTB33   | PTK7    |         |             |          | PPARG    | WLS        |          | SYPL2    | NPC1      | SCN1B    |          | MYBL2    | PRSS12   |
| NT5E      | WLS      | ZC3HAV1L | PTPRJ   |         |             |          | PPM1L    | ZMAT3      |          | TENC1    | NT5E      | SECTM1   |          | MYH10    | PSMA5    |
| NTM       |          | ZNF528   | PTRF    |         |             |          | PRKG2    | ZNF136     |          | TGM2     | NTM       | SEPW1    |          | NACC1    | PSMB9    |
| OCM2      |          | ZNF583   | PXMP2   |         |             |          | PRSS35   | ZNF566     |          | TNRC6A   | OCM2      | SET      |          | NASP     | PSMC3IP  |
| P2RX5     |          | ZNF610   | RAD54L  |         |             |          | PSD3     |            |          | TROAP    | P2RX5     | SFXN3    |          | NAT14    | PSRC1    |
| PAPPA     |          |          | RARG    |         |             |          | PTGFRN   |            |          | UBP1     | PAPPA     | SIRPA    |          | NAV2     | PTK7     |
| PARD6G    |          |          | RBBP7   |         |             |          | PTGS1    |            |          | USP6     | PARD6G    | SLC16A2  |          | NBPF3    | PTPRJ    |
| PBX2      |          |          | RDH10   |         |             |          | PTPRG    |            |          | VAMP5    | PBX2      | SLC16A3  |          | NCAPD3   | PTRF     |
| PCMTD1    |          |          | RHPN2   |         |             |          | PTPRU    |            |          | ZBTB5    | PCMTD1    | SLC17A5  |          | NCAPH    | PTTG11P  |
| PDIA5     |          |          | RNFT2   |         |             |          | PXK      |            |          | ZC3H12A  | PDIA5     | SLC25A33 |          | NDC1     | PXMP2    |
| PDK3      |          |          | RPL39L  |         |             |          | QPCT     |            |          | ZDHHC12  | PDK3      | SLC25A36 |          | NEU1     | RACGAP1  |
| PDP2      |          |          | RRM2    |         |             |          | RAB27B   |            |          | ZWINT    | PDP2      | SLC25A51 |          | NGF      | RAD54L   |
| PHLDA1    |          |          | S100A16 |         |             |          | RAB31    |            |          | ZYG11A   | PHLDA1    | SLC26A2  |          | NID1     | RBBP7    |
| PIP5K1C   |          |          | SAMD12  |         |             |          | RAP1GAP2 |            |          |          | PIP5K1C   | SLC30A7  |          | NPM3     | RDH10    |
| PITPNC1   |          |          | SAP30   |         |             |          | RBMS1    |            |          |          | PITPNC1   | SLC35A1  |          | NREP     | RFC2     |
| PLEKHM1   |          |          | SCARA3  |         |             |          | REXO1    |            |          |          | PLEKHM1   | SLC35F3  |          | NSF      | RHPN2    |
| PMAIP1    |          |          | SCML1   |         |             |          | RGS2     |            |          |          | PMAIP1    | SLC37A2  |          | NSUN2    | RNASEH2A |
| PNPLA4    |          |          | SDC1    |         |             |          | RIN3     |            |          |          | PNPLA4    | SLC37A3  |          | NTN4     | RPS6KA5  |
| PODXL     |          |          | SDC4    |         |             |          | RPS6KA3  |            |          |          | PODXL     | SLC38A1  |          | NUDCD2   | RPSAP52  |
| POPCD3    |          |          | SEC61A2 |         |             |          | RRAGD    |            |          |          | POPCD3    | SLC4A4   |          | NUMA1    | RPSAP58  |

|          |                        |            |           |          |            |          |          |
|----------|------------------------|------------|-----------|----------|------------|----------|----------|
| PPAP2B   | SEMA3B                 | RRM2B      | PRR23C    | PPAP2B   | SLC5A3     | NUSAP1   | RRM2     |
| PPAP2C   | SEPT6                  | RTN4RL1    | PRSS12    | PPAP2C   | SLC6A15    | NXNL2    | RRP1B    |
| PPARG    | SERTAD4                | SATB1      | PSMA5     | PPARG    | SMPDL3A    | OIP5     | RUVBL2   |
| PRKG2    | SH3BP4                 | SC5D       | PSMB9     | PRKG2    | SMURF2     | ORC6     | S100A16  |
| PSD3     | SHCBP1                 | SCN1B      | PSMC3IP   | PSD3     | SNX6       | OXTR     | SAP30    |
| PSTPIP2  | SHMT1                  | SEMA5A     | PSRC1     | PSTPIP2  | SOGA3      | PACSIN2  | SCCPDH   |
| PTGFR    | SKP2                   | SEMA6A     | PTK7      | PTGFR    | SRPX       | PAQR4    | SDC1     |
| PTGFRN   | SLBP                   | SEMA6D     | PTPRJ     | PTGFRN   | SS18       | PDE1C    | SDC4     |
| PTGS1    | SLC1A5                 | SEPT3      | PTTG1IP   | PTGS1    | SSBP2      | PGM2     | SEC61A2  |
| PTPRG    | SLC38A11               | SEPT5      | PXMP2     | PTPRG    | ST6GALNAC2 | PHF19    | SEMA3B   |
| PXK      | SLC43A3                | SEPW1      | RACGAP1   | PXK      | STEAP1     | PIM1     | SEPT6    |
| QKI      | SLC4A8                 | SERINC1    | RAD51     | QKI      | STMN2      | PKMYT1   | SERTAD4  |
| QPCT     | SLC7A5                 | SES2       | RARG      | QPCT     | STMN3      | PLK2     | SFPQ     |
| RAB31    | SMAD3                  | SET        | RBBP7     | RAB31    | TIPARP     | PLTP     | SH2D4A   |
| RAB33A   | SNRPA                  | SFRP1      | RDH10     | RAB33A   | TMC7       | POC1A    | SH3BP4   |
| RAB3A    | SOGA1                  | SH3GL2     | RHPN2     | RAB3A    | TMEM117    | PODN     | SHCBP1   |
| RAET1L   | SORT1                  | SH3PXD2B   | RNASEH2A  | RAET1L   | TMEM192    | POLA2    | SHMT1    |
| RAP1GAP2 | SPA17                  | SIRPA      | RPL39L    | RAP1GAP2 | TMEM33     | POLE     | SLBP     |
| RBMS1    | SPAG5                  | SLC16A2    | RPSAP52   | RBMS1    | TMOD2      | PPME1    | SLC1A5   |
| REXO1    | ST3GAL4                | SLC16A3    | RPSAP58   | REXO1    | TMTC1      | PRC1     | SLC43A3  |
| RGL1     | STAG3L5P-PVRIG2P-PILRB | SLC16A6    | RRM2      | RGL1     | TNFAIP1    | PRSS12   | SLC4A8   |
| RGS2     | STMN1                  | SLC17A5    | RUVBL2    | RGS2     | TNFRSF10A  | PSMA5    | SLC7A5   |
| RIN3     | SUV39H1                | SLC25A32   | S100A16   | RIN3     | TNFRSF21   | PSMB9    | SLIT2    |
| RORA     | SUZ12P1                | SLC25A51   | SAMD12    | RORA     | TOB1       | PSMC3IP  | SMAD3    |
| RPL17    | SYNPO                  | SLC2A3     | SCCPDH    | RPL17    | TOLLIP     | PSRC1    | SMYD2    |
| RPS6KA3  | SYPL2                  | SLC35A1    | SCML1     | RPS6KA3  | TPRG1L     | PTK7     | SNAPIN   |
| RRAGD    | TACC3                  | SLC37A2    | SDC1      | RRAGD    | TRIB2      | PTPRJ    | SOGA1    |
| RTN4RL1  | TAGLN                  | SLC37A3    | SDC4      | RTN4RL1  | TSPAN31    | PTRF     | SORT1    |
| SC5D     | TAGLN2                 | SLC38A1    | SEC61A2   | SC5D     | TUBA3E     | PTTG1IP  | SPAG5    |
| SCN1B    | TDP1                   | SLC39A13   | SELENBP1  | SCN1B    | UBA6       | PXMP2    | SRRM2    |
| SECTM1   | TGFBI                  | SLC4A4     | SEMA3B    | SECTM1   | ULBP3      | RACGAP1  | SSRP1    |
| SEMA6A   | TGM2                   | SLC5A3     | SEPT6     | SEMA6A   | UNC5B      | RAD54L   | ST3GAL4  |
| SEPT5    | TK1                    | SLC6A15    | SERTAD4   | SEPT5    | USF2       | RBBP7    | STMN1    |
| SEPW1    | TMEM204                | SLFN5      | SFPQ      | SEPW1    | VLDLR      | RDH10    | STXBP5   |
| SERINC1  | TRIM6-TRIM34           | SLMO2      | SH2D4A    | SERINC1  | VSTM4      | RFC2     | SUOX     |
| SES2     | UBP1                   | SMPD1      | SH3BP4    | SES2     | ZBTB33     | RHPN2    | SUV39H1  |
| SET      | UCP2                   | SNX6       | SHCBP1    | SET      | ZC3HAV1L   | RNASEH2A | SUZ12P1  |
| SFRP1    | UHMK1                  | SRXN1      | SHMT1     | SFRP1    | ZNF136     | RPS6KA5  | SYT11    |
| SFXN3    | VAMP5                  | SS18       | SLBP      | SFXN3    | ZNF234     | RPSAP52  | TENC1    |
| SH3PXD2B | VANGL1                 | SSBP2      | SLC1A5    | SH3PXD2B | ZNF566     | RPSAP58  | TGFBI    |
| SIRPA    | WEE1                   | ST6GALNAC2 | SLC4A8    | SIRPA    |            | RRM2     | TGM2     |
| SLC16A2  | XRCC6BP1               | STEAP3     | SMAD3     | SLC16A2  |            | RRP1B    | TIMELESS |
| SLC16A3  | ZBTB5                  | STMN3      | SMYD2     | SLC16A3  |            | RUVBL2   | TNRC6A   |
| SLC17A5  | ZC3H12A                | STXBP1     | SNAPIN    | SLC17A5  |            | S100A16  | TROAP    |
| SLC25A33 | ZDHHC12                | SULF2      | SOGA1     | SLC25A33 |            | SAMD12   | TYMS     |
| SLC25A36 |                        | TAPBP      | SORT1     | SLC25A36 |            | SAP30    | VAMP5    |
| SLC25A51 |                        | TCP11L2    | SSRP1     | SLC25A51 |            | SCCPDH   | WDR34    |
| SLC26A2  |                        | TIPARP     | ST3GAL4   | SLC26A2  |            | SDC1     | XRCC6BP1 |
| SLC30A7  |                        | TMC7       | STMN1     | SLC30A7  |            | SDC4     | ZC3H12A  |
| SLC35A1  |                        | TMED4      | STXBP5    | SLC35A1  |            | SEC61A2  | ZWINT    |
| SLC35F3  |                        | TMEM117    | SUOX      | SLC35F3  |            | SELENBP1 |          |
| SLC37A2  |                        | TMEM158    | SUV39H1   | SLC37A2  |            | SEMA3B   |          |
| SLC37A3  |                        | TMOD2      | SUZ12P1   | SLC37A3  |            | SEPT6    |          |
| SLC38A1  |                        | TOB1       | SYPL2     | SLC38A1  |            | SERTAD4  |          |
| SLC39A13 |                        | TOLLIP     | TACC3     | SLC39A13 |            | SFPQ     |          |
| SLC4A4   |                        | TOX2       | TAGLN     | SLC4A4   |            | SH2D4A   |          |
| SLC5A3   |                        | TPRG1L     | TENC1     | SLC5A3   |            | SH3BP4   |          |
| SLC6A15  |                        | TRIB2      | TGFBI     | SLC6A15  |            | SHCBP1   |          |
| SLFN5    |                        | TSHZ3      | TGM2      | SLFN5    |            | SHMT1    |          |
| SMPDL3A  |                        | TSPAN11    | TK1       | SMPDL3A  |            | SLBP     |          |
| SMURF2   |                        | TUBA3E     | TNFAIP8L1 | SMURF2   |            | SLC1A5   |          |
| SNX6     |                        | UBA6       | TNRC6A    | SNX6     |            | SLC43A3  |          |



|            |  |  |  |  |        |  |              |  |            |  |          |
|------------|--|--|--|--|--------|--|--------------|--|------------|--|----------|
| SOGA3      |  |  |  |  | ULBP3  |  | TOE1         |  | SOGA3      |  | SLC4A8   |
| SPRY2      |  |  |  |  | USF2   |  | TRIM6-TRIM34 |  | SPRY2      |  | SLC7A5   |
| SRPX       |  |  |  |  | UST    |  | TROAP        |  | SRPX       |  | SLIT2    |
| SS18       |  |  |  |  | UXS1   |  | UBP1         |  | SS18       |  | SMAD3    |
| SSBP2      |  |  |  |  | VLDLR  |  | UCP2         |  | SSBP2      |  | SMYD2    |
| ST6GALNAC2 |  |  |  |  | VSTM4  |  | USP6         |  | ST6GALNAC2 |  | SNAPIN   |
| STEAP1     |  |  |  |  | WLS    |  | VAMP5        |  | STEAP1     |  | SNRPA    |
| STEAP3     |  |  |  |  | ZMAT3  |  | VANGL1       |  | STEAP3     |  | SOGA1    |
| STMN2      |  |  |  |  | ZNF136 |  | ZBTB5        |  | STMN2      |  | SORT1    |
| STMN3      |  |  |  |  | ZNF460 |  | ZC3H12A      |  | STMN3      |  | SPA17    |
| STXBP1     |  |  |  |  | ZNF521 |  | ZDHHC12      |  | STXBP1     |  | SPAG5    |
| SULF2      |  |  |  |  | ZNF566 |  | ZWINT        |  | SULF2      |  | SRRM2    |
| TBC1D17    |  |  |  |  | ZNF583 |  | ZYG11A       |  | TBC1D17    |  | SSRP1    |
| TBCCD1     |  |  |  |  |        |  |              |  | TBCCD1     |  | ST3GAL4  |
| TIPARP     |  |  |  |  |        |  |              |  | TIPARP     |  | STMN1    |
| TK2        |  |  |  |  |        |  |              |  | TK2        |  | STXBP5   |
| TLE3       |  |  |  |  |        |  |              |  | TLE3       |  | SUMO2    |
| TMC7       |  |  |  |  |        |  |              |  | TMC7       |  | SUOX     |
| TMED4      |  |  |  |  |        |  |              |  | TMED4      |  | SUV39H1  |
| TMEM117    |  |  |  |  |        |  |              |  | TMEM117    |  | SUZ12P1  |
| TMEM192    |  |  |  |  |        |  |              |  | TMEM192    |  | SYPL2    |
| TMEM33     |  |  |  |  |        |  |              |  | TMEM33     |  | SYT11    |
| TMOD2      |  |  |  |  |        |  |              |  | TMOD2      |  | TACC3    |
| TMTC1      |  |  |  |  |        |  |              |  | TMTC1      |  | TENC1    |
| TNFAIP1    |  |  |  |  |        |  |              |  | TNFAIP1    |  | TGFB1    |
| TNFRSF10A  |  |  |  |  |        |  |              |  | TNFRSF10A  |  | TGM2     |
| TNFRSF21   |  |  |  |  |        |  |              |  | TNFRSF21   |  | TGOLN2   |
| TOB1       |  |  |  |  |        |  |              |  | TOB1       |  | TIMELESS |
| TOLLIP     |  |  |  |  |        |  |              |  | TOLLIP     |  | TK1      |
| TOX2       |  |  |  |  |        |  |              |  | TOX2       |  | TMEM204  |
| TPRG1L     |  |  |  |  |        |  |              |  | TPRG1L     |  | TMEM97   |
| TRAPPC6B   |  |  |  |  |        |  |              |  | TRAPPC6B   |  | TNRC6A   |
| TRIB2      |  |  |  |  |        |  |              |  | TRIB2      |  | TOMM34   |
| TSHZ3      |  |  |  |  |        |  |              |  | TSHZ3      |  | TPD52L1  |
| TSPAN31    |  |  |  |  |        |  |              |  | TSPAN31    |  | TRIP13   |
| TUBA3E     |  |  |  |  |        |  |              |  | TUBA3E     |  | TROAP    |
| UBA6       |  |  |  |  |        |  |              |  | UBA6       |  | TYMS     |
| ULBP3      |  |  |  |  |        |  |              |  | ULBP3      |  | UCP2     |
| UNC5B      |  |  |  |  |        |  |              |  | UNC5B      |  | UHK1     |
| USF2       |  |  |  |  |        |  |              |  | USF2       |  | VAMP5    |
| UXS1       |  |  |  |  |        |  |              |  | UXS1       |  | VANGL1   |
| VLDLR      |  |  |  |  |        |  |              |  | VLDLR      |  | VANG1    |
| VSTM4      |  |  |  |  |        |  |              |  | VSTM4      |  | WDR34    |
| ZBTB33     |  |  |  |  |        |  |              |  | ZBTB33     |  | WDR62    |
| ZC3HAV1L   |  |  |  |  |        |  |              |  | ZC3HAV1L   |  | WEE1     |
| ZNF136     |  |  |  |  |        |  |              |  | ZNF136     |  | XRCC6BP1 |
| ZNF234     |  |  |  |  |        |  |              |  | ZNF234     |  | ZC3H12A  |
| ZNF521     |  |  |  |  |        |  |              |  | ZNF521     |  | ZDHHC12  |
| ZNF566     |  |  |  |  |        |  |              |  | ZNF566     |  | ZWINT    |
| ZNF610     |  |  |  |  |        |  |              |  | ZNF610     |  |          |

**Table S8: G4 statistic for genes significantly altered in BS and BLM-depleted cells**

**Extended G4 Statistics for genes regulated in BS patients compared to Normal control**

| Region          | -250bp to TSS     |             |              |           |             |              |           |             |              |
|-----------------|-------------------|-------------|--------------|-----------|-------------|--------------|-----------|-------------|--------------|
| Regulation      | Up or Down N=1138 |             |              |           |             |              |           |             |              |
| G4 Motif Strand | Either            |             |              | T         |             |              | NT        |             |              |
| Statistics      | # With G4         | Total # G4s | G4s per gene | # With G4 | Total # G4s | G4s per gene | # With G4 | Total # G4s | G4s per gene |
| Regulated Genes | 575               | 870         | 1.51         | 350       | 442         | 1.26         | 326       | 428         | 1.31         |
| Random Genes    | 531.78            | 807.26      | 1.52         | 322.23    | 407.13      | 1.26         | 310.25    | 398.93      | 1.29         |
| SD(Random)      | 16.41             | 30.03       | 0.03         | 15.33     | 20.99       | 0.03         | 14.5      | 21.39       | 0.03         |
| FDR Rand > Reg  | 0.006             | 0.021       | 0.57         | 0.045     | 0.05        | 0.495        | 0.147     | 0.081       | 0.18         |
| FDR Rand < Reg  | 0.994             | 0.982       | 0.43         | 0.962     | 0.955       | 0.506        | 0.871     | 0.922       | 0.821        |

| Region          | -250bp to TSS |             |              |           |             |              |           |             |              |
|-----------------|---------------|-------------|--------------|-----------|-------------|--------------|-----------|-------------|--------------|
| Regulation      | Up N=1000     |             |              |           |             |              |           |             |              |
| G4 Motif Strand | Either        |             |              | T         |             |              | NT        |             |              |
| Statistics      | # With G4     | Total # G4s | G4s per gene | # With G4 | Total # G4s | G4s per gene | # With G4 | Total # G4s | G4s per gene |
| Regulated Genes | 505           | 741         | 1.47         | 302       | 371         | 1.23         | 288       | 370         | 1.28         |
| Random Genes    | 467.86        | 710.25      | 1.52         | 282.76    | 356.71      | 1.26         | 273.63    | 351.42      | 1.28         |
| SD(Random)      | 15.44         | 27.7        | 0.03         | 14.12     | 20.38       | 0.03         | 13.54     | 19.34       | 0.03         |
| FDR Rand > Reg  | 0.004         | 0.145       | 0.935        | 0.087     | 0.228       | 0.855        | 0.164     | 0.189       | 0.491        |
| FDR Rand < Reg  | 0.998         | 0.864       | 0.065        | 0.919     | 0.785       | 0.145        | 0.854     | 0.828       | 0.509        |

| Region          | -250bp to TSS |             |              |           |             |              |           |             |              |
|-----------------|---------------|-------------|--------------|-----------|-------------|--------------|-----------|-------------|--------------|
| Regulation      | Down N=138    |             |              |           |             |              |           |             |              |
| G4 Motif Strand | Either        |             |              | T         |             |              | NT        |             |              |
| Statistics      | # With G4     | Total # G4s | G4s per gene | # With G4 | Total # G4s | G4s per gene | # With G4 | Total # G4s | G4s per gene |
| Regulated Genes | 70            | 129         | 1.84         | 48        | 71          | 1.48         | 38        | 58          | 1.53         |
| Random Genes    | 64.52         | 98.06       | 1.52         | 38.68     | 48.74       | 1.26         | 37.66     | 48.42       | 1.29         |
| SD(Random)      | 5.73          | 10.31       | 0.09         | 5.03      | 7.24        | 0.09         | 5.27      | 7.42        | 0.09         |
| FDR Rand > Reg  | 0.188         | 0.001       | 0.001        | 0.042     | 0.003       | 0.004        | 0.514     | 0.109       | 0.003        |
| FDR Rand < Reg  | 0.844         | 0.999       | 0.999        | 0.972     | 0.998       | 0.996        | 0.562     | 0.918       | 0.997        |

| Region          | TSS to +250       |             |              |           |             |              |           |             |              |
|-----------------|-------------------|-------------|--------------|-----------|-------------|--------------|-----------|-------------|--------------|
| Regulation      | Up or Down N=1138 |             |              |           |             |              |           |             |              |
| G4 Motif Strand | Either            |             |              | T         |             |              | NT        |             |              |
| Statistics      | # With G4         | Total # G4s | G4s per gene | # With G4 | Total # G4s | G4s per gene | # With G4 | Total # G4s | G4s per gene |
| Regulated Genes | 577               | 829         | 1.44         | 303       | 359         | 1.18         | 377       | 470         | 1.25         |
| Random Genes    | 536.45            | 771.84      | 1.44         | 262.73    | 319.64      | 1.22         | 365.46    | 454.18      | 1.24         |
| SD(Random)      | 16.32             | 27.08       | 0.03         | 13.37     | 17.71       | 0.03         | 16.06     | 21.57       | 0.02         |
| FDR Rand > Reg  | 0.007             | 0.019       | 0.525        | 0.001     | 0.013       | 0.868        | 0.256     | 0.243       | 0.424        |
| FDR Rand < Reg  | 0.993             | 0.982       | 0.475        | 0.999     | 0.989       | 0.132        | 0.76      | 0.776       | 0.577        |

| Region          | TSS to +250 |             |              |           |             |              |           |             |              |
|-----------------|-------------|-------------|--------------|-----------|-------------|--------------|-----------|-------------|--------------|
| Regulation      | Up N=1000   |             |              |           |             |              |           |             |              |
| G4 Motif Strand | Either      |             |              | T         |             |              | NT        |             |              |
| Statistics      | # With G4   | Total # G4s | G4s per gene | # With G4 | Total # G4s | G4s per gene | # With G4 | Total # G4s | G4s per gene |
| Regulated Genes | 507         | 721         | 1.42         | 272       | 319         | 1.17         | 328       | 402         | 1.23         |
| Random Genes    | 472.1       | 679.64      | 1.44         | 231.06    | 280.98      | 1.22         | 320.73    | 398.9       | 1.24         |
| SD(Random)      | 15.58       | 26.87       | 0.03         | 12.95     | 17.77       | 0.03         | 14.35     | 19.57       | 0.03         |
| FDR Rand > Reg  | 0.015       | 0.068       | 0.724        | 0.001     | 0.024       | 0.912        | 0.329     | 0.458       | 0.767        |
| FDR Rand < Reg  | 0.987       | 0.934       | 0.276        | 0.999     | 0.978       | 0.088        | 0.692     | 0.564       | 0.233        |

| Region          | TSS to +250 |             |              |           |             |              |           |             |              |
|-----------------|-------------|-------------|--------------|-----------|-------------|--------------|-----------|-------------|--------------|
| Regulation      | Down N=138  |             |              |           |             |              |           |             |              |
| G4 Motif Strand | Either      |             |              | T         |             |              | NT        |             |              |
| Statistics      | # With G4   | Total # G4s | G4s per gene | # With G4 | Total # G4s | G4s per gene | # With G4 | Total # G4s | G4s per gene |
| Regulated Genes | 70          | 108         | 1.54         | 31        | 40          | 1.29         | 49        | 68          | 1.39         |
| Random Genes    | 64.94       | 93.33       | 1.44         | 31.73     | 38.61       | 1.22         | 44.41     | 55.15       | 1.24         |
| SD(Random)      | 5.75        | 9.83        | 0.08         | 4.83      | 6.58        | 0.09         | 5.5       | 7.59        | 0.07         |
| FDR Rand > Reg  | 0.222       | 0.084       | 0.089        | 0.599     | 0.429       | 0.183        | 0.235     | 0.06        | 0.031        |
| FDR Rand < Reg  | 0.825       | 0.938       | 0.913        | 0.477     | 0.636       | 0.824        | 0.818     | 0.953       | 0.969        |

| Region          | First 250bp of Intron 1 |             |              |           |             |              |           |             |              |
|-----------------|-------------------------|-------------|--------------|-----------|-------------|--------------|-----------|-------------|--------------|
| Regulation      | Up or Down N=1117       |             |              |           |             |              |           |             |              |
| G4 Motif Strand | Either                  |             |              | T         |             |              | NT        |             |              |
| Statistics      | # With G4               | Total # G4s | G4s per gene | # With G4 | Total # G4s | G4s per gene | # With G4 | Total # G4s | G4s per gene |
| Regulated Genes | 689                     | 1110        | 1.61         | 288       | 355         | 1.23         | 541       | 755         | 1.4          |
| Random Genes    | 621.33                  | 958.77      | 1.54         | 251.32    | 314.89      | 1.25         | 476.63    | 645.96      | 1.36         |
| SD(Random)      | 16.11                   | 30.78       | 0.03         | 13.42     | 18.83       | 0.03         | 16.55     | 26          | 0.03         |
| FDR Rand > Reg  | 0.001                   | <0.001      | 0.013        | 0.002     | 0.015       | 0.735        | <0.001    | <0.001      | 0.076        |
| FDR Rand < Reg  | 1                       | 1           | 0.987        | 0.999     | 0.986       | 0.265        | 1         | 1           | 0.924        |

| Region          | TSS to +250 |             |              |           |             |              |           |             |              |
|-----------------|-------------|-------------|--------------|-----------|-------------|--------------|-----------|-------------|--------------|
| Regulation      | Up N=987    |             |              |           |             |              |           |             |              |
| G4 Motif Strand | Either      |             |              | T         |             |              | NT        |             |              |
| Statistics      | # With G4   | Total # G4s | G4s per gene | # With G4 | Total # G4s | G4s per gene | # With G4 | Total # G4s | G4s per gene |
| Regulated Genes | 605         | 973         | 1.61         | 258       | 317         | 1.23         | 474       | 656         | 1.38         |
| Random Genes    | 548.96      | 847.84      | 1.54         | 222.21    | 278.74      | 1.25         | 421.25    | 570.87      | 1.36         |
| SD(Random)      | 15.21       | 29.55       | 0.03         | 13.23     | 18.25       | 0.03         | 14.84     | 23.96       | 0.03         |
| FDR Rand > Reg  | 0.001       | <0.001      | 0.018        | 0.002     | 0.021       | 0.76         | <0.001    | <0.001      | 0.177        |
| FDR Rand < Reg  | 0.999       | 1           | 0.982        | 0.998     | 0.983       | 0.24         | 1         | 1           | 0.823        |

| Region          | TSS to +250 |             |              |           |             |              |           |             |              |
|-----------------|-------------|-------------|--------------|-----------|-------------|--------------|-----------|-------------|--------------|
| Regulation      | Down N=130  |             |              |           |             |              |           |             |              |
| G4 Motif Strand | Either      |             |              | T         |             |              | NT        |             |              |
| Statistics      | # With G4   | Total # G4s | G4s per gene | # With G4 | Total # G4s | G4s per gene | # With G4 | Total # G4s | G4s per gene |
| Regulated Genes | 84          | 137         | 1.63         | 30        | 38          | 1.27         | 67        | 99          | 1.48         |
| Random Genes    | 72.45       | 112.03      | 1.55         | 29.49     | 36.99       | 1.25         | 55.78     | 75.7        | 1.36         |
| SD(Random)      | 5.78        | 11.18       | 0.09         | 4.75      | 6.66        | 0.1          | 5.5       | 8.7         | 0.08         |
| FDR Rand > Reg  | 0.027       | 0.018       | 0.177        | 0.489     | 0.447       | 0.438        | 0.02      | 0.002       | 0.083        |
| FDR Rand < Reg  | 0.981       | 0.986       | 0.823        | 0.599     | 0.6         | 0.57         | 0.985     | 0.999       | 0.917        |

**Extended G4 Statistics for genes with altered regulation in BLM-depleted compared to NS shRNA depleted human fibroblasts filtered to remove NS shRNA vs Control**

| Region          | -250bp to TSS     |             |              |           |             |              |           |             |              |
|-----------------|-------------------|-------------|--------------|-----------|-------------|--------------|-----------|-------------|--------------|
| Regulation      | Up or Down N=1067 |             |              |           |             |              |           |             |              |
| G4 Motif Strand | Either            |             |              | T         |             |              | NT        |             |              |
| Statistics      | # With G4         | Total # G4s | G4s per gene | # With G4 | Total # G4s | G4s per gene | # With G4 | Total # G4s | G4s per gene |
| Regulated Genes | 508               | 777         | 1.53         | 296       | 381         | 1.29         | 303       | 396         | 1.31         |
| Random Genes    | 498.04            | 756.25      | 1.52         | 302.94    | 382         | 1.26         | 292.01    | 375.44      | 1.29         |
| SD(Random)      | 15.93             | 28.62       | 0.03         | 14.61     | 20.8        | 0.03         | 13.61     | 20.13       | 0.03         |
| FDR Rand > Reg  | 0.286             | 0.231       | 0.357        | 0.701     | 0.538       | 0.187        | 0.218     | 0.146       | 0.247        |
| FDR Rand < Reg  | 0.734             | 0.776       | 0.644        | 0.32      | 0.492       | 0.813        | 0.806     | 0.866       | 0.754        |

| Region          | -250bp to TSS |             |              |           |             |              |           |             |              |
|-----------------|---------------|-------------|--------------|-----------|-------------|--------------|-----------|-------------|--------------|
| Regulation      | Up N=547      |             |              |           |             |              |           |             |              |
| G4 Motif Strand | Either        |             |              | T         |             |              | NT        |             |              |
| Statistics      | # With G4     | Total # G4s | G4s per gene | # With G4 | Total # G4s | G4s per gene | # With G4 | Total # G4s | G4s per gene |
| Regulated Genes | 281           | 425         | 1.51         | 167       | 216         | 1.29         | 164       | 209         | 1.27         |
| Random Genes    | 255.3         | 387.14      | 1.52         | 155.32    | 195.94      | 1.26         | 150.09    | 193.22      | 1.29         |
| SD(Random)      | 11.22         | 20.47       | 0.05         | 10.27     | 13.87       | 0.04         | 10.06     | 14.39       | 0.04         |
| FDR Rand > Reg  | 0.007         | 0.034       | 0.533        | 0.137     | 0.088       | 0.213        | 0.087     | 0.144       | 0.626        |
| FDR Rand < Reg  | 0.996         | 0.971       | 0.467        | 0.884     | 0.92        | 0.787        | 0.924     | 0.874       | 0.377        |

| Region          | -250bp to TSS |             |              |           |             |              |           |             |              |
|-----------------|---------------|-------------|--------------|-----------|-------------|--------------|-----------|-------------|--------------|
| Regulation      | Down N=520    |             |              |           |             |              |           |             |              |
| G4 Motif Strand | Either        |             |              | T         |             |              | NT        |             |              |
| Statistics      | # With G4     | Total # G4s | G4s per gene | # With G4 | Total # G4s | G4s per gene | # With G4 | Total # G4s | G4s per gene |
| Regulated Genes | 227           | 352         | 1.55         | 129       | 165         | 1.28         | 139       | 187         | 1.35         |
| Random Genes    | 243.04        | 369.82      | 1.52         | 147.49    | 186.43      | 1.26         | 142.16    | 182.93      | 1.29         |
| SD(Random)      | 11.06         | 20.1        | 0.05         | 10.65     | 14.55       | 0.04         | 10.12     | 14.51       | 0.05         |
| FDR Rand > Reg  | 0.928         | 0.823       | 0.258        | 0.962     | 0.942       | 0.35         | 0.643     | 0.395       | 0.113        |
| FDR Rand < Reg  | 0.081         | 0.188       | 0.742        | 0.049     | 0.066       | 0.651        | 0.39      | 0.624       | 0.887        |

| Region          | TSS to +250       |             |              |           |             |              |           |             |              |
|-----------------|-------------------|-------------|--------------|-----------|-------------|--------------|-----------|-------------|--------------|
| Regulation      | Up or Down N=1067 |             |              |           |             |              |           |             |              |
| G4 Motif Strand | Either            |             |              | T         |             |              | NT        |             |              |
| Statistics      | # With G4         | Total # G4s | G4s per gene | # With G4 | Total # G4s | G4s per gene | # With G4 | Total # G4s | G4s per gene |
| Regulated Genes | 515               | 722         | 1.4          | 256       | 307         | 1.2          | 341       | 415         | 1.22         |
| Random Genes    | 504.37            | 726.39      | 1.44         | 246.26    | 299.79      | 1.22         | 342.37    | 425.46      | 1.24         |
| SD(Random)      | 15.1              | 26.31       | 0.03         | 13.76     | 17.88       | 0.03         | 15.25     | 21.14       | 0.03         |
| FDR Rand > Reg  | 0.233             | 0.564       | 0.906        | 0.259     | 0.334       | 0.742        | 0.55      | 0.692       | 0.84         |
| FDR Rand < Reg  | 0.786             | 0.449       | 0.094        | 0.767     | 0.68        | 0.261        | 0.48      | 0.325       | 0.16         |

| Region          | TSS to +250 |             |              |           |             |              |           |             |              |
|-----------------|-------------|-------------|--------------|-----------|-------------|--------------|-----------|-------------|--------------|
| Regulation      | Up N=547    |             |              |           |             |              |           |             |              |
| G4 Motif Strand | Either      |             |              | T         |             |              | NT        |             |              |
| Statistics      | # With G4   | Total # G4s | G4s per gene | # With G4 | Total # G4s | G4s per gene | # With G4 | Total # G4s | G4s per gene |
| Regulated Genes | 258         | 369         | 1.43         | 142       | 174         | 1.23         | 166       | 195         | 1.17         |
| Random Genes    | 257.97      | 372.22      | 1.44         | 126.71    | 154.17      | 1.22         | 175.93    | 219.15      | 1.25         |
| SD(Random)      | 11.16       | 19.37       | 0.04         | 10.3      | 13.18       | 0.04         | 11.18     | 14.93       | 0.03         |
| FDR Rand > Reg  | 0.531       | 0.586       | 0.625        | 0.079     | 0.072       | 0.414        | 0.828     | 0.952       | 0.983        |
| FDR Rand < Reg  | 0.501       | 0.439       | 0.378        | 0.933     | 0.931       | 0.586        | 0.197     | 0.054       | 0.017        |

| Region          | TSS to +250 |             |              |           |             |              |           |             |              |
|-----------------|-------------|-------------|--------------|-----------|-------------|--------------|-----------|-------------|--------------|
| Regulation      | Down N=520  |             |              |           |             |              |           |             |              |
| G4 Motif Strand | Either      |             |              | T         |             |              | NT        |             |              |
| Statistics      | # With G4   | Total # G4s | G4s per gene | # With G4 | Total # G4s | G4s per gene | # With G4 | Total # G4s | G4s per gene |
| Regulated Genes | 257         | 353         | 1.37         | 114       | 133         | 1.17         | 175       | 220         | 1.26         |
| Random Genes    | 245.38      | 353.43      | 1.44         | 120.16    | 146.26      | 1.22         | 166.94    | 207.55      | 1.24         |
| SD(Random)      | 11.27       | 19.18       | 0.04         | 9.95      | 13.11       | 0.04         | 10.56     | 14.49       | 0.04         |
| FDR Rand > Reg  | 0.167       | 0.523       | 0.943        | 0.742     | 0.854       | 0.885        | 0.242     | 0.213       | 0.361        |
| FDR Rand < Reg  | 0.861       | 0.501       | 0.057        | 0.283     | 0.16        | 0.122        | 0.783     | 0.81        | 0.643        |

| Region          | First 250bp of Intron 1 |             |              |           |             |              |           |             |              |
|-----------------|-------------------------|-------------|--------------|-----------|-------------|--------------|-----------|-------------|--------------|
| Regulation      | Up or Down N=997        |             |              |           |             |              |           |             |              |
| G4 Motif Strand | Either                  |             |              | T         |             |              | NT        |             |              |
| Statistics      | # With G4               | Total # G4s | G4s per gene | # With G4 | Total # G4s | G4s per gene | # With G4 | Total # G4s | G4s per gene |
| Regulated Genes | 586                     | 900         | 1.54         | 236       | 294         | 1.25         | 454       | 606         | 1.33         |
| Random Genes    | 554.75                  | 858.11      | 1.55         | 224.01    | 280.62      | 1.25         | 424.97    | 575.54      | 1.35         |
| SD(Random)      | 15.56                   | 29.17       | 0.03         | 12.86     | 17.74       | 0.03         | 14.98     | 23.61       | 0.03         |
| FDR Rand > Reg  | 0.024                   | 0.074       | 0.642        | 0.193     | 0.237       | 0.569        | 0.029     | 0.094       | 0.748        |
| FDR Rand < Reg  | 0.98                    | 0.928       | 0.358        | 0.83      | 0.779       | 0.432        | 0.975     | 0.915       | 0.253        |

| Region          | TSS to +250 |             |              |           |             |              |           |             |              |
|-----------------|-------------|-------------|--------------|-----------|-------------|--------------|-----------|-------------|--------------|
| Regulation      | Up N=514    |             |              |           |             |              |           |             |              |
| G4 Motif Strand | Either      |             |              | T         |             |              | NT        |             |              |
| Statistics      | # With G4   | Total # G4s | G4s per gene | # With G4 | Total # G4s | G4s per gene | # With G4 | Total # G4s | G4s per gene |
| Regulated Genes | 294         | 451         | 1.53         | 129       | 162         | 1.26         | 222       | 289         | 1.3          |
| Random Genes    | 286.33      | 442.69      | 1.55         | 115.36    | 144.55      | 1.25         | 220.07    | 298.6       | 1.36         |
| SD(Random)      | 10.52       | 19.96       | 0.04         | 9.33      | 12.77       | 0.05         | 11.01     | 17.38       | 0.04         |
| FDR Rand > Reg  | 0.237       | 0.35        | 0.602        | 0.082     | 0.095       | 0.463        | 0.445     | 0.729       | 0.932        |
| FDR Rand < Reg  | 0.79        | 0.667       | 0.398        | 0.932     | 0.917       | 0.538        | 0.582     | 0.293       | 0.069        |

| Region          | TSS to +250 |             |              |           |             |              |           |             |              |
|-----------------|-------------|-------------|--------------|-----------|-------------|--------------|-----------|-------------|--------------|
| Regulation      | Down N=483  |             |              |           |             |              |           |             |              |
| G4 Motif Strand | Either      |             |              | T         |             |              | NT        |             |              |
| Statistics      | # With G4   | Total # G4s | G4s per gene | # With G4 | Total # G4s | G4s per gene | # With G4 | Total # G4s | G4s per gene |
| Regulated Genes | 292         | 449         | 1.54         | 107       | 132         | 1.23         | 232       | 317         | 1.37         |
| Random Genes    | 268.24      | 414.51      | 1.55         | 109.12    | 136.8       | 1.25         | 206.07    | 278.79      | 1.35         |
| SD(Random)      | 10.81       | 21.07       | 0.05         | 8.7       | 12.28       | 0.05         | 10.64     | 16.86       | 0.04         |
| FDR Rand > Reg  | 0.012       | 0.048       | 0.558        | 0.627     | 0.664       | 0.656        | 0.007     | 0.017       | 0.373        |
| FDR Rand < Reg  | 0.99        | 0.955       | 0.442        | 0.419     | 0.361       | 0.346        | 0.994     | 0.986       | 0.627        |
